# Supplementary material
Source: PubMed Central journal article supplement (PMC8634550)
Supplement: NIHMS1737820-supplement-Supplementary.pdf [file NIHMS1737820-supplement-Supplementary.pdf]

**SUPPLEMENT TO “ASYMPTOTICALLY INDEPENDENT  
U-STATISTICS IN HIGH DIMENSIONAL ADAPTIVE  
TESTING”\***

BY YINQIU HE<sup>†</sup>, GONGJUN XU<sup>†</sup> CHONG WU<sup>‡</sup> AND WEI PAN<sup>§</sup>

*University of Michigan<sup>†</sup>, Florida State University<sup>‡</sup>, and University of  
Minnesota<sup>§</sup>*

CONTENTS

|   |                                                                       |     |
|---|-----------------------------------------------------------------------|-----|
| A | Proofs and Supplementary Results . . . . .                            | 2   |
|   | A.1 Proof of Proposition 2.1 . . . . .                                | 2   |
|   | A.2 Proof of Theorem 2.1 . . . . .                                    | 3   |
|   | A.3 Proof of Theorem 2.3 . . . . .                                    | 6   |
|   | A.4 Proof of Theorem 2.4 . . . . .                                    | 8   |
|   | A.5 Proof of Theorem 2.5 . . . . .                                    | 8   |
|   | A.6 Proof of Proposition 2.3 . . . . .                                | 11  |
|   | A.7 Proof of Proposition 2.4 . . . . .                                | 12  |
|   | A.8 Conditions of Theorems 4.1–4.5 . . . . .                          | 17  |
|   | A.9 Proof of Theorems 4.1 and 4.2 . . . . .                           | 18  |
|   | A.10 Proof of Theorem 4.3 . . . . .                                   | 20  |
|   | A.11 Proof of Theorem 4.4 . . . . .                                   | 21  |
|   | A.12 Proof of Theorem 4.5 . . . . .                                   | 21  |
|   | A.13 Proof of Theorem 4.6 . . . . .                                   | 23  |
|   | A.14 Proof of Theorem 4.7 . . . . .                                   | 26  |
|   | A.15 Proof of Proposition 4.2 . . . . .                               | 29  |
|   | A.16 Results on the Generalized Linear Model in Section 4.3 . . . . . | 31  |
| B | Assisted Lemmas . . . . .                                             | 35  |
|   | B.1 Lemmas for the proof of Theorem 2.1 . . . . .                     | 36  |
|   | B.2 Lemmas for the proof of Theorem 2.3 . . . . .                     | 74  |
|   | B.3 Lemmas for the proof of Theorem 2.4 . . . . .                     | 99  |
|   | B.4 Lemmas for the proof of Theorem 2.5 . . . . .                     | 101 |
|   | B.5 Lemmas for the proof of Theorem 4.1 . . . . .                     | 123 |
|   | B.6 Lemmas for the proof of Theorem 4.3 . . . . .                     | 127 |
|   | B.7 Lemmas for the proof of Theorem 4.4 . . . . .                     | 133 |

---

\*This research is supported by NSF grants DMS-1711226, DMS-1712717, SES-1659328, CAREER SES-1846747, and NIH grants R01GM113250, R01GM126002, R01HL105397 and R01HL116720.

|      |                                              |     |
|------|----------------------------------------------|-----|
| B.8  | Lemmas for the proof of Theorem 4.5          | 135 |
| B.9  | Lemmas for the proof of Theorem 4.6          | 138 |
| B.10 | Lemmas for the proof of Theorem 4.7          | 156 |
| B.11 | Proof of Remark 2.4                          | 159 |
| B.12 | Proof of Corollary 4.1                       | 160 |
| C    | Computation & Supplementary Simulations      | 160 |
| C.1  | Computation                                  | 160 |
| C.2  | Simulations on One-Sample Covariance Testing | 170 |
| C.3  | Simulations on Other Testing Examples        | 183 |
|      | References                                   | 188 |

We give proofs of the main results and additional simulations in this supplementary material. For simplicity, we use  $C$  to represent some generic positive constant, which does not change with  $(n, p)$  and may represent different values from place to place.

## APPENDIX A: PROOFS AND SUPPLEMENTARY RESULTS

**A.1. Proof of Proposition 2.1.** To prove  $\mathcal{U}(a)$  in (2.3) is location invariant, we examine the equivalent form,

$$\mathcal{U}(a) = (P_{2a}^n)^{-1} \sum_{1 \leq j_1 \neq j_2 \leq p} \sum_{1 \leq i_1 \neq \dots \neq i_{2a} \leq n} \prod_{k=1}^a (x_{i_{2k-1}, j_1} x_{i_{2k-1}, j_2} - x_{i_{2k-1}, j_1} x_{i_{2k}, j_2}).$$

We consider  $\Delta = (\Delta_1, \dots, \Delta_p)^\top \in \mathbb{R}^p$ , and examine  $a = 1$  first. For each  $(j_1, j_2)$ , since

$$\begin{aligned} & (x_{i_1, j_1} + \Delta_{j_1})(x_{i_1, j_2} + \Delta_{j_2}) - (x_{i_1, j_1} + \Delta_{j_1})(x_{i_2, j_2} + \Delta_{j_2}) \\ &= (x_{i_1, j_1} x_{i_1, j_2} - x_{i_1, j_1} x_{i_2, j_2}) + \Delta_{j_1}(x_{i_1, j_2} - x_{i_2, j_2}), \end{aligned}$$

then it follows that

$$\begin{aligned} & \sum_{1 \leq i_1 \neq i_2 \leq n} [(x_{i_1, j_1} + \Delta_{j_1})(x_{i_1, j_2} + \Delta_{j_2}) - (x_{i_1, j_1} + \Delta_{j_1})(x_{i_2, j_2} + \Delta_{j_2})] \\ & \quad - \sum_{1 \leq i_1 \neq i_2 \leq n} (x_{i_1, j_1} x_{i_1, j_2} - x_{i_1, j_1} x_{i_2, j_2}) \\ &= \sum_{1 \leq i_1 \neq i_2 \leq n} \Delta_{j_1}(x_{i_1, j_2} - x_{i_2, j_2}) + \sum_{i=1}^n \Delta_{j_1}(x_{i, j_2} - x_{i, j_2}) \\ &= \Delta_{j_1} \sum_{i_1=1}^n \sum_{i_2=1}^n (x_{i_1, j_2} - x_{i_2, j_2}) \\ &= 0. \end{aligned}$$

That is,  $\mathcal{U}(1)$  is location invariant. For  $a = 2$ , given  $(j_1, j_2)$ , following a similar analysis to  $\mathcal{U}(1)$ , we have

$$\begin{aligned}
\text{(A.1.1)} \quad & \sum_{1 \leq i_1 \neq \dots \neq i_4 \leq n} \left\{ [(x_{i_1, j_1} + \Delta_{j_1})(x_{i_1, j_2} + \Delta_{j_2}) - (x_{i_1, j_1} + \Delta_{j_1})(x_{i_2, j_2} + \Delta_{j_2})] \right. \\
& \quad \times [(x_{i_3, j_1} + \Delta_{j_1})(x_{i_3, j_2} + \Delta_{j_2}) - (x_{i_3, j_1} + \Delta_{j_1})(x_{i_4, j_2} + \Delta_{j_2})] \left. \right\} \\
& - \sum_{1 \leq i_1 \neq \dots \neq i_4 \leq n} \left\{ (x_{i_1, j_1} x_{i_1, j_2} - x_{i_1, j_1} x_{i_2, j_2}) \right. \\
& \quad \times [(x_{i_3, j_1} + \Delta_{j_1})(x_{i_3, j_2} + \Delta_{j_2}) - (x_{i_3, j_1} + \Delta_{j_1})(x_{i_4, j_2} + \Delta_{j_2})] \left. \right\} \\
& = 0.
\end{aligned}$$

Similarly, we also have

$$\begin{aligned}
\text{(A.1.2)} \quad & \sum_{1 \leq i_1 \neq \dots \neq i_4 \leq n} \left\{ (x_{i_1, j_1} x_{i_1, j_2} - x_{i_1, j_1} x_{i_2, j_2}) \right. \\
& \quad \times [(x_{i_3, j_1} + \Delta_{j_1})(x_{i_3, j_2} + \Delta_{j_2}) - (x_{i_3, j_1} + \Delta_{j_1})(x_{i_4, j_2} + \Delta_{j_2})] \left. \right\} \\
& - \sum_{1 \leq i_1 \neq \dots \neq i_4 \leq n} [(x_{i_1, j_1} x_{i_1, j_2} - x_{i_1, j_1} x_{i_2, j_2})(x_{i_3, j_1} x_{i_3, j_2} - x_{i_3, j_1} x_{i_4, j_2})] \\
& = 0.
\end{aligned}$$

Combining (A.1.1) and (A.1.2), we know  $\mathcal{U}(2)$  is location invariant. Following the argument above similarly, by induction, we obtain that  $\mathcal{U}(a)$  is location invariant for a general integer  $a \geq 3$ .

**A.2. Proof of Theorem 2.1.** For the covariance testing example in Section 2,  $\mathcal{U}(a)$  is location invariant by Proposition 2.1, and  $\mathcal{U}(\infty)$  is also location invariant straightforwardly by its expression in (2.8). Then we assume without loss of generality that  $E(\mathbf{x}) = \mathbf{0}$  in this section. To prove Theorem 2.1, we first derive the variances and the covariances of the U-statistics, and then prove the asymptotic joint normality of the U-statistics.

In particular, the next Lemma A.2.1 derives the asymptotic form of variance  $\sigma^2(a)$  in (2.7).

**LEMMA A.2.1.** *Under the conditions of Theorem 2.1, for any finite integer  $a$ , following the notation in (2.2),*

$$\sigma^2(a) = \frac{a!}{P_a^n} \sum_{\substack{1 \leq j_1 \neq j_2 \leq p; \\ 1 \leq j_3 \neq j_4 \leq p}} (\Pi_{j_1, j_2, j_3, j_4})^a \{1 + o(1)\},$$

which is of order  $\Theta(p^2n^{-a})$ . In addition, for  $\tilde{\mathcal{U}}(a)$  defined in (2.5) and  $\tilde{\mathcal{U}}^*(a) := \mathcal{U}(a) - \tilde{\mathcal{U}}(a)$ , we have  $\text{var}\{\mathcal{U}(a)\} = \text{var}\{\tilde{\mathcal{U}}(a)\}\{1+o(1)\}$ ,  $\text{var}\{\tilde{\mathcal{U}}^*(a)\} = o(1) \times \text{var}\{\tilde{\mathcal{U}}(a)\}$ , and  $\tilde{\mathcal{U}}^*(a)/\sigma(a) \xrightarrow{P} 0$ .

PROOF. See Section B.1.1 on Page 36.  $\square$

Moreover, the following Lemma A.2.2 shows that the covariances between different  $\mathcal{U}(a)$ 's asymptotically converge to 0.

LEMMA A.2.2. Under the conditions of Theorem 2.1, for finite integers  $a \neq b$ ,  $\text{cov}\{\mathcal{U}(a)/\sigma(a), \mathcal{U}(b)/\sigma(b)\} \rightarrow 0$ , as  $n, p \rightarrow \infty$ .

PROOF. See Section B.1.2 on Page 50.  $\square$

Lemmas A.2.1 and A.2.2 together show that the covariance matrix of  $[\mathcal{U}(a_1)/\sigma(a_1), \dots, \mathcal{U}(a_m)/\sigma(a_m)]^\top$  converges to  $I_m$  asymptotically. To finish the proof of Theorem 2.1, it remains to show that the joint limiting distribution of the U-statistics is normal.

For finite integers  $a_1, \dots, a_m$ , to obtain the joint asymptotic normality of  $[\mathcal{U}(a_1)/\sigma(a_1), \dots, \mathcal{U}(a_m)/\sigma(a_m)]^\top$ , by the Cramér-Wold theorem, it is equivalent to prove that any fixed linear combination of  $[\mathcal{U}(a_1)/\sigma(a_1), \dots, \mathcal{U}(a_m)/\sigma(a_m)]^\top$  converges to normal. Recall that Lemma A.2.1 shows that  $\tilde{\mathcal{U}}^*(a)/\sigma(a) \xrightarrow{P} 0$  for any finite integer  $a$ . Thus by Slutsky's theorem, it suffices to prove that any fixed linear combination of  $[\tilde{\mathcal{U}}(a_1)/\sigma(a_1), \dots, \tilde{\mathcal{U}}(a_m)/\sigma(a_m)]^\top$  converges to normal. To be specific, we show that for constants  $t_1, \dots, t_m$  satisfying  $\sum_{r=1}^m t_r^2 = 1$ ,

$$(A.2.1) \quad Z_n := \sum_{r=1}^m t_r \tilde{\mathcal{U}}(a_r)/\sigma(a_r) \xrightarrow{D} \mathcal{N}(0, 1).$$

To prove (A.2.1), we apply the martingale central limit theorem in Heyde and Brown [14] (similar arguments can date back to Bai and Saranadasa [1]). Let  $\mathcal{F}_0 = \{\emptyset, \Omega\}$ ,  $\mathcal{F}_k = \sigma\{\mathbf{x}_1, \dots, \mathbf{x}_k\}$ , and  $\mathbb{E}_k(\cdot)$  denote the conditional expectation given  $\mathcal{F}_k$  for  $k = 1, \dots, n$ . Define  $D_{n,k} = (\mathbb{E}_k - \mathbb{E}_{k-1})Z_n$  and  $\pi_{n,k}^2 = \mathbb{E}_{k-1}(D_{n,k}^2)$ . Note that  $\mathbb{E}_0(\cdot) = \mathbb{E}(\cdot)$ , and  $\mathbb{E}(Z_n) = 0$  as  $\mathbb{E}(\mathbf{x}) = \mathbf{0}$ . It follows that  $Z_n = \sum_{k=1}^n D_{n,k}$ . By martingale central limit theorem, to prove (A.2.1), it is sufficient to show

$$(A.2.2) \quad \sum_{k=1}^n \pi_{n,k}^2 / \text{var}(Z_n) \xrightarrow{P} 1, \quad \sum_{k=1}^n \mathbb{E}(D_{n,k}^4) / \text{var}^2(Z_n) \rightarrow 0.$$

Here  $\text{var}(Z_n) \rightarrow \sum_{r=1}^m t_r^2 = 1$  by Lemmas A.2.1 and A.2.2, and  $\mathbb{E}(\sum_{k=1}^n \pi_{n,k}^2) = \text{var}(Z_n)$  by the following Lemma A.2.3.

LEMMA A.2.3. *Under the conditions of Theorem 2.1,  $\mathbb{E}(\sum_{k=1}^n \pi_{n,k}^2) = \text{var}(Z_n)$ .*

PROOF. *See Section B.1.3 on Page 51.*  $\square$

Therefore to prove (A.2.2), it suffices to show

$$(A.2.3) \quad \text{var}\left(\sum_{k=1}^n \pi_{n,k}^2\right) \rightarrow 0 \quad \text{and} \quad \sum_{k=1}^n \mathbb{E}(D_{n,k}^4) \rightarrow 0.$$

Note that  $D_{n,k}$  and  $\pi_{n,k}^2$  in (A.2.3) can be written as  $D_{n,k} = \sum_{r=1}^m t_r A_{n,k,a_r}$  and  $\pi_{n,k}^2 = \sum_{1 \leq r_1, r_2 \leq m} \mathbb{E}_{k-1}(A_{n,k,a_{r_1}} A_{n,k,a_{r_2}})$ , where we define  $A_{n,k,a} = (\mathbb{E}_k - \mathbb{E}_{k-1})\{\tilde{\mathcal{U}}(a)/\sigma(a)\}$  for each finite integer  $a$ . The following Lemma A.2.4 gives the explicit form of  $A_{n,k,a}$ .

LEMMA A.2.4. *For finite integer  $a$ , when  $k < a$ ,  $A_{n,k,a} = 0$ ; when  $k \geq a$ ,*

$$A_{n,k,a} = \frac{a}{\sigma(a) P_a^n} \sum_{1 \leq i_1 \neq \dots \neq i_{a-1} \leq k-1} \sum_{1 \leq j_1 \neq j_2 \leq p} (x_{k,j_1} x_{k,j_2}) \times \prod_{t=1}^{a-1} (x_{i_t, j_1} x_{i_t, j_2}).$$

PROOF. *See Section B.1.4 on Page 51.*  $\square$

With the form of  $A_{n,k,a}$  in Lemma A.2.4, the forms of  $D_{n,k}$  and  $\pi_{n,k}^2$  can be obtained, and we can prove the next two Lemmas A.2.5 and A.2.6, which suggest that (A.2.3) holds.

LEMMA A.2.5. *Under the conditions of Theorem 2.1,  $\text{var}(\sum_{k=1}^n \pi_{n,k}^2) \rightarrow 0$ . In particular, under Condition 2.2,  $\text{var}(\sum_{k=1}^n \pi_{n,k}^2) = O(p^{-1} \log^3 p)$ ; under Condition 2.2\*,  $\text{var}(\sum_{k=1}^n \pi_{n,k}^2) = O(n^{-1} + p^{-2})$ .*

PROOF. *See Section B.1.5 on Page 53.*  $\square$

LEMMA A.2.6. *Under the conditions of Theorem 2.1,  $\sum_{k=1}^n \mathbb{E}(D_{n,k}^4) = O(1/n)$ .*

PROOF. *See Section B.1.6 on Page 67.*  $\square$

Finally, by Heyde and Brown [14], we have as  $n, p \rightarrow \infty$ ,

$$(A.2.4) \quad \begin{aligned} & \sup_t \left| P(Z_n \leq t) - \Phi(t) \right| \\ & \leq C \left\{ \mathbb{E} \left[ \frac{\sum_{k=1}^n \mathbb{E}_{k-1}(D_{n,k}^2)}{\text{var}(Z_n)} - 1 \right]^2 + \frac{\sum_{k=1}^n \mathbb{E}(D_{n,k}^4)}{\text{var}^2(Z_n)} \right\}^{1/5} \\ & \rightarrow 0, \end{aligned}$$

which proves (A.2.1). In summary, Theorem 2.1 is proved.

**A.3. Proof of Theorem 2.3.** In this section, we first introduce some notation, and then present the proof.

*Notation.* For  $\mathcal{U}(a)$  in (2.3), by the symmetricity of covariance matrix, we can replace  $\sum_{1 \leq j_1 \neq j_2 \leq p}$  by  $2 \times \sum_{1 \leq j_1 < j_2 \leq p}$ . This implies that the summation over  $\{(j_1, j_2) : 1 \leq j_1 \neq j_2 \leq p\}$  is equivalent to the summation over  $\{(j_1, j_2) : 1 \leq j_1 < j_2 \leq p\}$  up to a constant. Without loss of generality, we consider  $j_1 < j_2$  below. We rewrite the index set  $\{(j_1, j_2) : 1 \leq j_1 < j_2 \leq p\}$  as

$$(A.3.1) \quad L := \left\{ (j_l^1, j_l^2) : 1 \leq l \leq q = \binom{p}{2} \right\},$$

where  $j_l^1 = \arg \min_{1 \leq k \leq p-1} \{\sum_{t=1}^k (p-t) \geq l\}$  and  $j_l^2 = l + j_l^1 - \sum_{t=1}^{j_l^1-1} (p-t)$ . For each  $(j_l^1, j_l^2) \in L$ , define

$$(A.3.2) \quad U_l^a = \sum_{1 \leq i_1 \neq \dots \neq i_a \leq n} \prod_{k=1}^a x_{i_k, j_l^1} x_{i_k, j_l^2}.$$

Then  $\tilde{\mathcal{U}}(a) = 2(P_a^n)^{-1} \sum_{l=1}^q U_l^a$  following the definition in (2.5). Furthermore, we define

$$(A.3.3) \quad \begin{aligned} \tilde{G}_l &= \sum_{i=1}^n \frac{x_{i, j_l^1}}{\sqrt{\sigma_{j_l^1, j_l^1}}} \times \frac{x_{i, j_l^2}}{\sqrt{\sigma_{j_l^2, j_l^2}}}, \\ M_n &= \max_{1 \leq l \leq q} (\tilde{G}_l)^2, \\ \hat{G}_l &= \sum_{i=1}^n \frac{x_{i, j_l^1}}{\sqrt{\sigma_{j_l^1, j_l^1}}} \times \frac{x_{i, j_l^2}}{\sqrt{\sigma_{j_l^2, j_l^2}}} \mathbf{1} \left\{ \left| \frac{x_{i, j_l^1}}{\sqrt{\sigma_{j_l^1, j_l^1}}} \times \frac{x_{i, j_l^2}}{\sqrt{\sigma_{j_l^2, j_l^2}}} \right| \leq \tau_n \right\} \\ &\quad - \mathbb{E} \left[ \sum_{i=1}^n \frac{x_{i, j_l^1}}{\sqrt{\sigma_{j_l^1, j_l^1}}} \times \frac{x_{i, j_l^2}}{\sqrt{\sigma_{j_l^2, j_l^2}}} \mathbf{1} \left\{ \left| \frac{x_{i, j_l^1}}{\sqrt{\sigma_{j_l^1, j_l^1}}} \times \frac{x_{i, j_l^2}}{\sqrt{\sigma_{j_l^2, j_l^2}}} \right| \leq \tau_n \right\} \right], \\ \hat{M}_n &= \max_{1 \leq l \leq q} (\hat{G}_l)^2, \end{aligned}$$

where we define  $\sigma_{j_l^1, j_l^1} = \text{var}(x_{i, j_l^1})$ ,  $\sigma_{j_l^2, j_l^2} = \text{var}(x_{i, j_l^2})$ ,  $\tau_n = \tau \log(p+n)$  with  $\tau$  being a sufficiently large positive constant and  $\mathbf{1}\{\cdot\}$  represents an indicator function. In addition, we define  $\|\mathbf{a}\|_{\min} = \min_{1 \leq i \leq p} |a_i|$  for  $\mathbf{a} \in \mathbb{R}^p$ , and

$$(A.3.4) \quad y_p = 4 \log p - \log \log p + y.$$

*Proof.* Similarly to Section A.2, since  $\mathcal{U}(a)$  in (2.3) and  $\mathcal{U}(\infty)$  in (2.8) are location invariant, we assume without loss of generality that  $\mathbf{E}(\mathbf{x}) = \mathbf{0}$ .

To prove Theorem 2.3, we first establish the asymptotic independence between  $\hat{M}_n/n$  and  $\tilde{\mathcal{U}}(a)/\sigma(a_r)$  for  $r = 1, \dots, m$ , and then we show that  $n\mathcal{U}^2(\infty)$  and  $\mathcal{U}(a_r)$  are close to  $\hat{M}_n/n$  and  $\tilde{\mathcal{U}}(a_r)$ , respectively. Specifically, the following Lemma A.3.1 shows that  $\hat{M}_n/n$  and  $\tilde{\mathcal{U}}(a_r)/\sigma(a_r)$ 's are asymptotically independent.

LEMMA A.3.1. *Under the conditions of Theorem 2.3, when  $\tau > 0$  in (A.3.3) is a sufficiently large constant,*

$$\left| P\left(\frac{\hat{M}_n}{n} > y_p, \frac{\tilde{\mathcal{U}}(a_1)}{\sigma(a_1)} \leq z_1, \dots, \frac{\tilde{\mathcal{U}}(a_m)}{\sigma(a_m)} \leq z_m\right) - P\left(\frac{\hat{M}_n}{n} > y_p\right) \prod_{r=1}^m P\left(\frac{\tilde{\mathcal{U}}(a_r)}{\sigma(a_r)} \leq z_r\right) \right| \rightarrow 0.$$

PROOF. See Section B.2.1 on Page 75. □

To show that  $\hat{M}_n/n$  and  $n\mathcal{U}(\infty)^2$  are close, we use  $M_n/n$  defined in (A.3.3) as an intermediate variable. We next prove that  $M_n/n$  and  $\hat{M}_n/n$  have small difference in the sense that the conclusion in Lemma A.3.1 still holds by replacing  $\hat{M}_n$  with  $M_n$ . This is formally stated in the following Lemma A.3.2.

LEMMA A.3.2. *Under the conditions of Theorem 2.3,*

$$\left| P\left(\frac{M_n}{n} > y_p, \frac{\tilde{\mathcal{U}}(a_1)}{\sigma(a_1)} \leq z_1, \dots, \frac{\tilde{\mathcal{U}}(a_m)}{\sigma(a_m)} \leq z_m\right) - P\left(\frac{M_n}{n} > y_p\right) \prod_{r=1}^m P\left(\frac{\tilde{\mathcal{U}}(a_r)}{\sigma(a_r)} \leq z_r\right) \right| \rightarrow 0.$$

PROOF. See Section B.2.5 on Page 94. □

Given Lemma A.3.2, we further prove that  $M_n/n$  and  $\tilde{\mathcal{U}}(a)/\sigma(a_r)$  are close to  $n\mathcal{U}^2(\infty)$  and  $\mathcal{U}(a_r)$ , respectively. In particular, by the proof of Theorem 3 in Cai and Jiang [4], we know  $\{n^2\mathcal{U}^2(\infty) - M_n\}/n \xrightarrow{P} 0$ . In addition, Lemma A.2.1 proves that  $\{\mathcal{U}(a_r) - \tilde{\mathcal{U}}(a_r)\}/\sigma(a_r) \xrightarrow{P} 0$ . Based on these results and Lemma A.3.2, the following Lemma A.3.3 shows that the conclusion in Lemma A.3.2 still holds by replacing  $M_n/n$  with  $n\mathcal{U}^2(\infty)$  and replacing  $\tilde{\mathcal{U}}(a_r)$  with  $\mathcal{U}(a_r)$ .

LEMMA A.3.3. *Under the conditions of Theorem 2.3,*

$$\left| P\left(n\mathcal{U}^2(\infty) > y_p, \frac{\mathcal{U}(a_1)}{\sigma(a_1)} \leq z_1, \dots, \frac{\mathcal{U}(a_m)}{\sigma(a_m)} \leq z_m\right) - P\left(n\mathcal{U}^2(\infty) > y_p\right) \prod_{r=1}^m P\left(\frac{\mathcal{U}(a_r)}{\sigma(a_r)} \leq z_r\right) \right| \rightarrow 0.$$

PROOF. *See Section B.2.6 on Page 96.*  $\square$

Lemma A.3.3 then proves Theorem 2.3.

**A.4. Proof of Theorem 2.4.** As both  $\mathcal{U}(a)$  and  $\mathbb{V}_u(a)$  are location invariant in the sense of Proposition 2.1, we assume  $\mathbf{E}(\mathbf{x}) = \mathbf{0}$ . To prove Theorem 2.4, we decompose  $\mathbb{V}_u(a) = \mathbb{V}_{u,1}(a) + \mathbb{V}_{u,2}(a)$ , where we define

$$\mathbb{V}_{u,1}(a) = \frac{2a!}{(P_a^n)^2} \sum_{1 \leq j_1 \neq j_2 \leq p} \sum_{1 \leq i_1 \neq \dots \neq i_a \leq n} \prod_{t=1}^a x_{i_t, j_1}^2 x_{i_t, j_2}^2,$$

and  $\mathbb{V}_{u,2}(a) = \mathbb{V}_u(a) - \mathbb{V}_{u,1}(a)$ . The next Lemma A.4.1 shows that  $\mathbb{V}_{u,1}(a)$  is of a larger order than  $\mathbb{V}_{u,2}(a)$ , and thus it is the leading term in  $\mathbb{V}_u(a)$ .

LEMMA A.4.1. *Under the conditions of Theorem 2.4,  $\mathbb{V}_{u,1}(a)/\mathbf{E}\{\mathbb{V}_{u,1}(a)\} \xrightarrow{P} 1$  and  $\mathbb{V}_{u,2}(a)/\mathbf{E}\{\mathbb{V}_{u,1}(a)\} \xrightarrow{P} 0$ .*

PROOF. *See Section B.3 on Page 99.*  $\square$

Lemma A.4.1 implies that  $\mathbb{V}_u(a)/\mathbf{E}\{\mathbb{V}_{u,1}(a)\} \xrightarrow{P} 1$ . As  $\mathbb{V}_u(a) > 0$  with probability 1,  $\mathbf{E}\{\mathbb{V}_{u,1}(a)\}/\mathbb{V}_u(a) \xrightarrow{P} 1$ . In addition, note that  $\mathbf{E}\{\mathbb{V}_{u,1}(a)\} = 2a!(P_a^n)^{-1} \sum_{1 \leq j_1 \neq j_2 \leq p} \{\mathbf{E}(x_{1, j_1}^2 x_{1, j_2}^2)\}^a$ . By (B.1.20) and (B.1.29) in Section B.1.1.2, we have  $\text{var}\{\mathcal{U}(a)\}/\mathbf{E}\{\mathbb{V}_{u,1}(a)\} \rightarrow 1$ . Therefore,

$$\frac{\mathbb{V}_u(a)}{\text{var}\{\mathcal{U}(a)\}} = \frac{\mathbb{V}_u(a)}{\mathbf{E}\{\mathbb{V}_{u,1}(a)\}} \times \frac{\mathbf{E}\{\mathbb{V}_{u,1}(a)\}}{\text{var}\{\mathcal{U}(a)\}} \xrightarrow{P} 1.$$

**A.5. Proof of Theorem 2.5.** We first present Condition A.1 in Theorem 2.5, which is a generalized version of Condition 2.2\* under  $H_A$ .

CONDITION A.1. *Following the central moment notation in (2.2), for  $t \leq 8$ , we assume that there exists constant  $\tilde{\kappa}_t$  such that  $\prod_{j_1, \dots, j_t} = \tilde{\kappa}_t \mathbf{E}(\prod_{k=1}^t z_{j_k})$ , where  $1 \leq j_1, \dots, j_t \leq p$  and  $(z_1, \dots, z_p)^\top \sim \mathcal{N}(\mathbf{0}, \Sigma_A)$ .*



Condition A.1 generalizes Condition 2.2\* to the alternative setting. Similarly to Condition 2.2\*, Condition A.1 is satisfied when  $\mathbf{x}$  follows an elliptical distribution with certain moment conditions [see 10, 23]. To be consistent with the notation in Condition 2.2\*, we let  $\kappa_1 = \tilde{\kappa}_4$  below.

We next introduce some notation, and then provide the proof.

*Notation.* For each given  $j_1 \in \{1, \dots, p\}$ , we define

$$\begin{aligned} J_{j_1} &= \{(j_1, j_2) : \sigma_{j_1, j_2} \neq 0, 1 \leq j_1 \neq j_2 \leq p\}, \\ J_{j_1}^c &= \{(j_1, j_2) : \sigma_{j_1, j_2} = 0, 1 \leq j_1 \neq j_2 \leq p\}. \end{aligned}$$

Then  $J_A = \cup_{j_1=1}^p J_{j_1}$ , and we correspondingly define  $J_A^c = \cup_{j_1=1}^p J_{j_1}^c$ , which is the set difference of  $\{(j_1, j_2) : 1 \leq j_1 \neq j_2 \leq p\}$  and  $J_A$ . Moreover, we define  $F(a, c) = (-1)^c \binom{a}{c} / P_{a+c}^n$ , and

$$K(c, j_1, j_2) = F(a, c) \sum_{1 \leq i_1 \neq \dots \neq i_{a+c} \leq n} \prod_{t=1}^{a-c} (x_{i_t, j_1} x_{i_t, j_2}) \prod_{t=a-c+1}^a x_{i_t, j_1} \prod_{t=a+1}^{a+c} x_{i_t, j_2}.$$

We decompose  $\mathcal{U}(a) = T_{U, a, 1, 1} + T_{U, a, 1, 2} + T_{U, a, 2}$ , where

$$\begin{aligned} \text{(A.5.1)} \quad T_{U, a, 1, 1} &= \sum_{(j_1, j_2) \in J_A^c} K(0, j_1, j_2), \quad T_{U, a, 1, 2} = \sum_{(j_1, j_2) \in J_A^c} \sum_{c=1}^a K(c, j_1, j_2), \\ T_{U, a, 2} &= \sum_{(j_1, j_2) \in J_A} \sum_{c=0}^a K(c, j_1, j_2). \end{aligned}$$

*Proof.* Similarly to Section A.2, we first derive the variances and the covariances of the U-statistics, and then prove the asymptotic joint normality of the U-statistics. Particularly, the next Lemma A.5.1 derives the asymptotic form of  $\text{var}\{\mathcal{U}(a)\}$ , and additionally shows that among the three terms in (A.5.1),  $T_{U, a, 1, 1}$  is the leading one.

LEMMA A.5.1. *Under the conditions of Theorem 2.5,  $\sigma^2(a) = \text{var}\{\mathcal{U}(a)\} \simeq \text{var}(T_{U, a, 1, 1})$ , where*

$$\text{var}(T_{U, a, 1, 1}) \simeq 2a! \kappa_1^a n^{-a} \sum_{1 \leq j_1 \neq j_2 \leq p} \sigma_{j_1, j_1}^a \sigma_{j_2, j_2}^a,$$

which is  $\Theta(p^2 n^{-a})$ . Moreover,  $\text{var}(T_{U, a, 1, 2}) = o(p^2 n^{-a})$ ,  $\text{var}(T_{U, a, 2}) = o(p^2 n^{-a})$  and  $\{\mathcal{U}(a) - T_{U, a, 1, 1}\} / \sigma(a) \xrightarrow{P} 0$ .

PROOF. See Section B.4.1 on Page 101. □

The following Lemma A.5.2 shows that the covariance between two different U-statistics asymptotically converges to 0.

LEMMA A.5.2. *Under the conditions of Theorem 2.5, for two integers  $a \neq b$ ,  $\text{cov}\{\mathcal{U}(a)/\sigma(a), \mathcal{U}(b)/\sigma(b)\} \rightarrow 0$ .*

PROOF. *See Section B.4.2 on Page 112.*  $\square$

To finish the proof, it remains to obtain the joint asymptotic normality of  $[\mathcal{U}(a_1)/\sigma(a_1), \dots, \mathcal{U}(a_m)/\sigma(a_m)]^\top$ . By the Cramér-Wold theorem, it is equivalent to prove that any fixed linear combination of  $[\mathcal{U}(a_1)/\sigma(a_1), \dots, \mathcal{U}(a_m)/\sigma(a_m)]^\top$  converges to a normal distribution. By Lemma A.5.1,  $\{\mathcal{U}(a) - T_{U,a,1,1}\}/\sigma(a) \xrightarrow{P} 0$ , thus by the Slutsky's theorem, it suffices to prove that any fixed linear combination of  $[T_{U,a_1,1,1}/\sigma(a_1), \dots, T_{U,a_m,1,1}/\sigma(a_m)]^\top$  converges to a normal distribution. Similarly to Section A.2, we redefine  $Z_n$  as below with  $\sum_{r=1}^m t_r^2 = 1$ , and prove that

$$(A.5.2) \quad Z_n := \sum_{r=1}^m t_r T_{U,a_r,1,1}/\sigma(a_r) \xrightarrow{D} \mathcal{N}(0, 1).$$

We next prove (A.5.2) by the martingale central limit theorem, similarly to Section A.2. In particular, we define  $E_k(\cdot)$  in the same way as in Section A.2, and still define  $D_{n,k} = (E_k - E_{k-1})Z_n$  and  $\pi_{n,k}^2 = E_{k-1}(D_{n,k}^2)$ . It follows that  $D_{n,k} = \sum_{r=1}^m t_r A_{n,k,a_r}$  and  $\pi_{n,k}^2 = \sum_{1 \leq r_1, r_2 \leq m} t_{r_1} t_{r_2} E_{k-1}(A_{n,k,a_{r_1}} A_{n,k,a_{r_2}})$ , where we redefine  $A_{n,k,a_r} = (E_k - E_{k-1})\{T_{U,a_r,1,1}/\sigma(a_r)\}$ . Note that  $\sigma_{j_1, j_2} = 0$  when  $(j_1, j_2) \in J_A^c$ , and  $T_{U,a,1,1}$  is a summation over  $(j_1, j_2) \in J_A^c$ . Thus the proof of Lemma A.2.4 in Section B.1.4 applies similarly, and we obtain the explicit form of  $A_{n,k,a}$ . Specifically, for each finite integer  $a$ , when  $k < a$ ,  $A_{n,k,a} = 0$ ; when  $k \geq a$ ,

$$A_{n,k,a} = \frac{a}{\sigma(a)P_a^n} \sum_{1 \leq i_1 \neq \dots \neq i_{a-1} \leq k-1} \sum_{(j_1, j_2) \in J_A^c} (x_{k, j_1} x_{k, j_2}) \prod_{t=1}^{a-1} (x_{i_t, j_1} x_{i_t, j_2}).$$

With the form of  $A_{n,k,a}$ , we can obtain the explicit forms of  $D_{n,k}$  and  $\pi_{n,k}^2$ . Then we can prove the following two Lemmas A.5.3 and A.5.4, which suggests that (A.5.2) holds.

LEMMA A.5.3. *Under the conditions of Theorem 2.5,  $\text{var}(\sum_{k=1}^n \pi_{n,k}^2) \rightarrow 0$ .*

PROOF. *See Section B.4.3 on Page 113.*  $\square$

LEMMA A.5.4. *Under the conditions of Theorem 2.5,  $\sum_{k=1}^n \mathbb{E}(D_{n,k}^4) \rightarrow 0$ .*

PROOF. *See Section B.4.4 on Page 121.*  $\square$

By Lemmas A.5.3 and A.5.4, (A.5.2) holds and thus Theorem 2.5 is proved.

**A.6. Proof of Proposition 2.3.** Consider the setting when  $n, p$  and  $|J_A|$  are given and the value of  $M$  is fixed as  $\Theta(1)$ . We next examine  $\rho_a$  in (2.13) as a function of integer  $a$  in the following two cases.

(i)  $|J_A| > Mp$ . When  $Mp/|J_A| < 1$ , both  $(Mp/|J_A|)^{1/a}$  and  $(a!)^{1/(2a)}$  are increasing functions of integer  $a$ . Thus  $\rho_a$  is an increasing function of  $a$ . Since  $a \in \mathbb{Z}^+$ ,  $\rho_a$  reaches the minimum value at  $a = 1$ .

(ii)  $|J_A| \leq Mp$ . Define  $\tilde{M} = Mp/|J_A|$ , and  $f(a) = (a!)^{1/(2a)}(\tilde{M})^{1/a}$ . Note that  $\rho_a$  and  $f(a)$  only differs by a constant. To find the minimum of  $\rho_a$ , it suffices to examine the minimum of  $f(a)$ .

In the following, we show that when  $f(a)$  starts to not decrease at some value, it will strictly increase afterwards. Specifically, we prove that  $f(a+2)/f(a+1) > 1$  if  $f(a+1)/f(a) \geq 1$ . Note that

$$\begin{aligned} \frac{f(a+1)}{f(a)} &= \frac{\{(a+1)!\}^{\frac{1}{2(a+1)}}(\tilde{M})^{\frac{1}{a+1}}}{(a!)^{\frac{1}{2a}}(\tilde{M})^{\frac{1}{a}}} \\ &= \left[ \frac{\{(a+1)!\}^a \tilde{M}^{2a}}{(a!)^{a+1} \tilde{M}^{2(a+1)}} \right]^{\frac{1}{2a(a+1)}} = \{d(a) \times \tilde{M}^{-2}\}^{\frac{1}{2a(a+1)}}, \end{aligned}$$

where  $d(a) = (a+1)^a(a!)^{-1}$ . It follows that  $f(a+1)/f(a) > 1$  and  $f(a+1)/f(a) = 1$  are equivalent to  $d(a) > \tilde{M}^2$  and  $d(a) = \tilde{M}^2$ , respectively. We next show that  $d(a)$  is a strictly increasing function of  $a$ . In particular,

$$\frac{d(a+1)}{d(a)} = \frac{(a+2)^{a+1}a!}{(a+1)^a(a+1)!} = \left(\frac{a+2}{a+1}\right)^{a+1} > 1.$$

Therefore we have  $d(a+1) > \tilde{M}^2$  if  $d(a) \geq \tilde{M}^2$ , and equivalently this implies that  $f(a+2)/f(a+1) > 1$  if  $f(a+1)/f(a) \geq 1$ .

Suppose  $a_0$  is the first integer such that  $d(a_0) \geq \tilde{M}^2$ , i.e., for any integer  $1 \leq a < a_0$ ,  $d(a) < \tilde{M}^2$ . By the analysis above, we know  $f(a)$  is decreasing when  $a < a_0$ , and  $f(a)$  is strictly increasing when  $a > a_0$ . Thus  $a_0$  achieves the minimum of  $f(a)$ , and  $a_0$  increases as  $\tilde{M}$  increases. Therefore the second part of proposition 2.3 is proved.

### A.7. Proof of Proposition 2.4.

PROOF. Consider the simplified test statistic given in (2.15). We assume  $\mathbb{E}(x_{i,j}) = 0$  and  $\text{var}(x_{i,j}^2) = 1, \forall j = 1, \dots, p$  without loss of generality. It is then equivalent to examine  $\mathcal{U}(\infty) = \max_{1 \leq j_1 < j_2 \leq p} |\sum_{k=1}^n x_{k,j_1} x_{k,j_2} / n|$ . We next prove (i) and (ii) of Proposition 2.4 in the following Sections A.7.1 and A.7.2, respectively.

A.7.1. *Proof of (i).* Under the alternative, we consider  $n$  i.i.d. observations  $(x_{k,1}, x_{k,2})$ , satisfying  $\mathbb{E}(x_{k,1}x_{k,2}) = \rho$ , for  $k = 1, \dots, n$ . Then by Condition 2.2\*,  $\text{var}(x_{k,1}x_{k,2}) = \mathbb{E}(x_{k,1}^2 x_{k,2}^2) - [\mathbb{E}(x_{k,1}x_{k,2})]^2 = \kappa_1(1 + 2\rho^2) - \rho^2$ . The power of  $\mathcal{U}(\infty)$  satisfies that

$$\begin{aligned}
 \text{(A.7.1)} \quad & P(|\mathcal{U}(\infty)| \geq t_p) \\
 &= P\left(\max_{1 \leq j_1 < j_2 \leq p} \left| \sum_{k=1}^n x_{k,j_1} x_{k,j_2} / n \right| \geq t_p\right) \\
 &\geq P\left(\left| \sum_{k=1}^n x_{k,1} x_{k,2} / n \right| \geq t_p\right) \\
 &\geq P\left(\sum_{k=1}^n x_{k,1} x_{k,2} / n \geq t_p\right) \\
 &= P\left(\frac{\sum_{k=1}^n (x_{k,1} x_{k,2} - \rho)}{\sqrt{n} \sqrt{\text{var}(x_{k,1} x_{k,2})}} \geq \frac{\sqrt{n}(t_p - \rho)}{\sqrt{\text{var}(x_{k,1} x_{k,2})}}\right).
 \end{aligned}$$

We apply the central limit theorem on  $x_{k,1}x_{k,2}$ ,  $k = 1, \dots, n$ , and obtain

$$\frac{\sum_{k=1}^n (x_{k,1} x_{k,2} - \rho)}{\sqrt{n} \sqrt{\text{var}(x_{k,1} x_{k,2})}} \xrightarrow{D} \mathcal{N}(0, 1).$$

Suppose  $Z$  follows a standard Gaussian distribution. As  $\log p \rightarrow \infty$ ,  $\log p/n = o(1)$ , and by Berry-Esseen Theorem, we have

$$\begin{aligned}
 \text{(A.7.1)} \quad &\geq P\left(Z \geq \frac{\sqrt{n}(t_p - \rho)}{\sqrt{\text{var}(x_{k,1} x_{k,2})}}\right) - \frac{C\mathbb{E}|x_{k,1} x_{k,2}|^3}{[\text{var}(x_{k,1} x_{k,2})]^{3/2} \sqrt{n}} \\
 &\geq P\left(Z \geq \frac{\sqrt{n}[n^{-1/2} \sqrt{4 \log p} - \rho]}{\sqrt{\kappa_1(1 + 2\rho^2) - \rho^2}}\right) - \frac{C \sqrt{\mathbb{E}|x_{k,1}|^6 \mathbb{E}|x_{k,2}|^6}}{[\text{var}(x_{k,1} x_{k,2})]^{3/2} \sqrt{n}} \\
 &\geq P(Z \geq C(2 - c_1) \sqrt{\log p}) - \frac{C}{\sqrt{n}} \\
 &\rightarrow 1 + o(1),
 \end{aligned}$$

where the second inequality uses  $t_p \leq n^{-1/2}\sqrt{4\log p}$  when  $p$  is sufficiently large; the third inequality uses  $\rho \geq c_1\sqrt{\log p/n}$ ; and the last step of convergence holds when  $c_1 > 2$ .

A.7.2. *Proof of (ii).* Recall the notation  $J_A$  and  $J_A^c$  in Section A.5. Under the considered alternative, when  $(j_1, j_2) \in J_A$ ,  $\mathbb{E}(x_{k,j_1}x_{k,j_2}) = \rho$ ; and when  $(j_3, j_4) \in J_A^c$ ,  $\mathbb{E}(x_{k,j_3}x_{k,j_4}) = 0$ . We have

$$\begin{aligned}
\text{(A.7.2)} \quad & P(|\mathcal{U}(\infty)| \geq t_p) \\
& \leq \sum_{1 \leq j_1 < j_2 \leq p} P\left(\left|\sum_{k=1}^n x_{k,j_1}x_{k,j_2}/n\right| \geq t_p\right) \\
& \leq \frac{1}{2} \sum_{(j_1, j_2) \in J_A} P\left(\left|\sum_{k=1}^n x_{k,j_1}x_{k,j_2}/n\right| \geq t_p\right) \\
& \quad + \frac{1}{2} \sum_{(j_3, j_4) \in J_A^c} P\left(\left|\sum_{k=1}^n x_{k,j_3}x_{k,j_4}/n\right| \geq t_p\right).
\end{aligned}$$

Next we show that under the conditions of Proposition 2.4,

$$\text{(A.7.3)} \quad \sum_{(j_1, j_2) \in J_A} P\left(\left|\sum_{k=1}^n x_{k,j_1}x_{k,j_2}/n\right| \geq t_p\right) \rightarrow 0,$$

and

$$\text{(A.7.4)} \quad \frac{1}{2} \sum_{(j_3, j_4) \in J_A^c} P\left(\left|\sum_{k=1}^n x_{k,j_3}x_{k,j_4}/n\right| \geq t_p\right) \leq \log(1 - \alpha)^{-1}.$$

A.7.2.1. *Proof of (A.7.3).* To prove (A.7.3), we derive an upper bound of  $P(|\sum_{k=1}^n x_{k,j_1}x_{k,j_2}/n| \geq t_p)$  for each  $(j_1, j_2) \in J_A$  by Lemma 6.8 in Cai and Jiang [4]. In the following, we consider a fixed index pair  $(j_1, j_2)$ , and for easy presentation, we write  $m_0 = \sqrt{\text{var}(x_{k,j_1}x_{k,j_2})}$  and  $\xi_k = (x_{k,j_1}x_{k,j_2} - \rho)/m_0$ . When  $(j_1, j_2) \in J_A$ , we have  $\mathbb{E}(\xi_k) = 0$ ,  $\text{var}(\xi_k) = 1$ , and by Condition 2.2\*,  $m_0^2 = \kappa_1(1 + 2\rho^2) - \rho^2$ . It follows that

$$P\left(\sum_{k=1}^n x_{k,j_1}x_{k,j_2}/n \geq t_p\right) = P\left(\frac{\sum_{k=1}^n \xi_k}{\sqrt{n \log p}} \geq y_n\right),$$

where  $y_n = \sqrt{n/\log p}m_0^{-1}(t_p - \rho)$ . We next show that  $y_n$  and  $\xi_k, k = 1, \dots, n$  satisfy the conditions of Lemma 6.8 in [4]. First note that  $y_n \rightarrow y = (2 - c_2)m_0^{-1}$ , and  $y > 0$  as  $c_2 < 2$ . We then show that  $\mathbb{E}\{\exp(\tilde{t}_0|\xi_k|^\vartheta)\} < \infty$  for

some  $\tilde{t}_0 > 0$  and  $0 < \vartheta \leq 1$ . In particular, given  $\varsigma$  and  $t_0$  in Proposition 2.4, we take  $\vartheta = \varsigma/2 \in (0, 1]$  and  $\tilde{t}_0 = t_0(2m_0)^\vartheta/2 > 0$ . By Lemma B.0.4,

$$\begin{aligned} |x_{k,j_1}x_{k,j_2} - \rho|^\vartheta &\leq (|x_{k,j_1}x_{k,j_2}| + |\rho|)^\vartheta \leq |x_{k,j_1}x_{k,j_2}|^\vartheta + |\rho|^\vartheta \\ &\leq \left(\frac{x_{k,j_1}^2 + x_{k,j_2}^2}{2}\right)^\vartheta + |\rho|^\vartheta \leq \frac{1}{2^\vartheta}(|x_{k,j_1}|^{2\vartheta} + |x_{k,j_2}|^{2\vartheta}) + |\rho|^\vartheta. \end{aligned}$$

It follows that

$$\begin{aligned} \text{(A.7.5)} \quad & \mathbb{E} \exp(\tilde{t}_0 |\xi_k|^\vartheta) \\ & \leq \mathbb{E} \exp \left[ \frac{\tilde{t}_0}{(2m_0)^\vartheta} (|x_{k,j_1}|^{2\vartheta} + |x_{k,j_2}|^{2\vartheta}) + \frac{\tilde{t}_0}{m_0^\vartheta} |\rho|^\vartheta \right] \\ & = \mathbb{E} [\exp(2^{-1}t_0|x_{k,j_1}|^\varsigma) \times \exp(2^{-1}t_0|x_{k,j_2}|^\varsigma)] \times \exp(t_0 2^{\vartheta-1} |\rho|^\vartheta) \\ & \leq \sqrt{\mathbb{E}[\exp(t_0|x_{k,j_1}|^\varsigma)] \times \mathbb{E}[\exp(t_0|x_{k,j_2}|^\varsigma)]} \times \exp(t_0 2^{\vartheta-1} |\rho|^\vartheta), \end{aligned}$$

where the last inequality follows from the Hölder's inequality. By the conditions in Proposition 2.4, we know  $\max_{(j_1, j_2) \in J_A} \mathbb{E}(t_0|x_{k,j_1}|^\varsigma) \times \mathbb{E}(t_0|x_{k,j_2}|^\varsigma) < \infty$  and  $\rho \leq c_2 \sqrt{\log p/n} = o(1)$ . Therefore, (A.7.5)  $< \infty$ . In summary,  $y_n$  and  $\xi_k, k = 1, \dots, n$  satisfy the conditions of Lemma 6.8 in [4].

By Lemma 6.8 in [4], as  $\log p = o(n^\beta)$  and  $\beta = \vartheta/(2 + \vartheta) = \varsigma/(4 + \varsigma)$ ,

$$\text{(A.7.6)} \quad P\left(\frac{\sum_{k=1}^n \xi_k}{\sqrt{n \log p}} \geq y_n\right) \simeq \frac{p^{-y_n^2/2} (\log p)^{-1/2}}{\sqrt{2\pi y}}.$$

Let  $z_0 = -\log(8\pi) - 2 \log \log(1-\alpha)^{-1}$ , then we can write  $t_p = n^{-1/2} \{4 \log p - \log \log p + z_0\}^{1/2}$  and

$$\begin{aligned} y_n^2 &= \frac{n}{\log p} (t_p - \rho)^2 \times \frac{1}{\text{var}(x_{k,j_1}x_{k,j_2})} \\ &= \frac{n}{\log p} (t_p^2 - 2\rho t_p + \rho^2) \times \frac{1}{\text{var}(x_{k,j_1}x_{k,j_2})} \\ &\geq \frac{1}{\text{var}(x_{k,j_1}x_{k,j_2})} \times \left\{ \frac{1}{\log p} (4 \log p - \log \log p + z_0) \right. \\ &\quad \left. - \frac{2c_2 \sqrt{\log p} \sqrt{4 \log p - \log \log p + z_0}}{\log p} + \frac{c_2^2 \log p}{\log p} \right\}, \end{aligned}$$

where the last inequality holds when  $\rho \leq c_2 \sqrt{\log p/n}$  and  $c_2 < 2$ . Then

$$\begin{aligned}
& p^{-y_n^2/2} \\
&= \exp(-(\log p)y_n^2/2) \\
&\leq \exp \left\{ -\frac{1}{\text{var}(x_{k,j_1}x_{k,j_2})} \left[ \frac{1}{2} \left( 4 \log p - \log \log p - \log(8\pi) - 2 \log \log(1-\alpha)^{-1} \right) \right. \right. \\
&\quad \left. \left. - c_2 \sqrt{\log p} \sqrt{4 \log p - \log \log p + z_0} + \frac{c_2^2 \log p}{2} \right] \right\} \\
&= \left\{ p^{-2} \sqrt{\log p} \times \sqrt{8\pi} \log(1-\alpha)^{-1} \times p^{-\frac{c_2^2}{2}} \right. \\
&\quad \left. \times \exp \left( c_2 \sqrt{\log p} \sqrt{4 \log p - \log \log p + z_0} \right) \right\}^{1/\{\text{var}(x_{k,j_1}x_{k,j_2})\}}.
\end{aligned}$$

By Condition 2.2\*,  $\text{var}(x_{k,j_1}x_{k,j_2}) = \kappa_1 + (2\kappa_1 - 1)\rho^2$ , and as  $\rho = o(1)$ , there exists a constant  $m > 0$  such that  $\text{var}(x_{k,j_1}x_{k,j_2}) \leq \kappa_1 + m$ . Thus

$$\begin{aligned}
& p^{-y_n^2/2} (\log p)^{-1/2} \\
&\leq (\log p)^{-1/2} \left\{ p^{-2} \sqrt{\log p} \times \sqrt{8\pi} (\log(1-\alpha)^{-1}) p^{-\frac{c_2^2}{2}} \right. \\
&\quad \left. \times \exp \left( c_2 \sqrt{\log p} \sqrt{4 \log p - \log \log p + z_0} \right) \right\}^{1/\{\text{var}(x_{k,j_1}x_{k,j_2})\}} \\
&\leq (\log p)^{-1/2} \left[ \sqrt{8\pi} \log(1-\alpha)^{-1} \sqrt{\log p} \times p^{-2-\frac{c_2^2}{2}+2c_2} \right]^{1/(\kappa_1+m)}.
\end{aligned}$$

Recall that  $y = (2 - c_2)[\text{var}(x_{k,j_1}x_{k,j_2})]^{-1/2}$ . Then by (A.7.6),

$$\begin{aligned}
\text{(A.7.7)} \quad & \frac{1}{2} \sum_{(j_1, j_2) \in J_A} P \left( \sum_{k=1}^n x_{k,j_1} x_{k,j_2} / n \geq t_p \right) \\
&= \frac{1}{2} \sum_{(j_1, j_2) \in J_A} P \left( \frac{\sum_{k=1}^n \xi_k}{\sqrt{n \log p}} \geq y_n \right) \\
&\leq \frac{|J_A|}{2} \frac{(\log p)^{-1/2}}{y \sqrt{2\pi}} \left( \sqrt{8\pi} \log(1-\alpha)^{-1} \sqrt{\log p} \times p^{-2-\frac{c_2^2}{2}+2c_2} \right)^{\frac{1}{\kappa_1+m}} \\
&= C_\alpha \exp \left( 2 \log \left[ p^{-\frac{(1-c_2+c_2^2/4)}{(\kappa_1+m)}} \left\{ \sqrt{|J_A|} (\log p)^{\frac{1}{4(\kappa_1+m)} - \frac{1}{4}} \right\} \right] \right),
\end{aligned}$$

where  $C_\alpha = \frac{1}{2y\sqrt{2\pi}} [\sqrt{8\pi} \log(1-\alpha)^{-1}]^{1/(\kappa_1+m)}$ . Thus, (A.7.7)  $\rightarrow 0$  when

$$p^{-\frac{(1-c_2/2)^2}{\kappa_1+m}} \sqrt{|J_A|} (\log p)^{\frac{1}{4(\kappa_1+m)} - \frac{1}{4}} \rightarrow 0.$$

Similarly, we have

$$(A.7.8) \quad \begin{aligned} & \sum_{(j_1, j_2) \in J_A} P\left(\frac{\sum_{k=1}^n x_{k, j_1} x_{k, j_2}}{n} \leq -t_p\right) \\ &= \sum_{(j_1, j_2) \in J_A} P\left(\frac{\sum_{k=1}^n (-x_{k, j_1} x_{k, j_2} + \rho)}{n \sqrt{\text{var}(x_{k, j_1} x_{k, j_2})}} \geq \frac{t_p + \rho}{\sqrt{\text{var}(x_{k, j_1} x_{k, j_2})}}\right), \end{aligned}$$

and (A.7.8)  $\rightarrow 0$  following the similar arguments as above. In summary, (A.7.3) holds when  $J_A = o(1)p^{\frac{2(1-c_2/2)^2}{\kappa_1+m}} (\log p)^{\frac{1}{2} - \frac{1}{2(\kappa_1+m)}}$  for some  $m > 0$ .

*A.7.2.2. Proof of (A.7.4).* Similarly to Section A.7.2.1, we derive an upper bound of  $P(\sum_{k=1}^n x_{k, j_3} x_{k, j_4} / n \geq t_p)$  for each  $(j_3, j_4) \in J_A^c$  by Lemma 6.8 in [4]. In the following, we consider a fixed index pair  $(j_3, j_4)$ ; and for easy presentation, we write  $\tilde{\xi}_k = x_{k, j_3} x_{k, j_4} / \sqrt{\kappa_1}$ ,  $k = 1, \dots, n$ . When  $(j_3, j_4) \in J_A^c$ ,  $E(x_{k, j_3} x_{k, j_4}) = 0$  and  $\text{var}(x_{k, j_3} x_{k, j_4}) = E\{(x_{k, j_3} x_{k, j_4})^2\} = \kappa_1$ , then we have  $E(\tilde{\xi}_k) = 0$  and  $\text{var}(\tilde{\xi}_k) = 1$ . To prove (A.7.4), we write

$$P\left(\sum_{k=1}^n x_{k, j_3} x_{k, j_4} / n \geq t_p\right) = P\left(\frac{\sum_{k=1}^n \tilde{\xi}_k}{\sqrt{n \log p}} \geq \tilde{y}_n\right),$$

where  $\tilde{y}_n = \sqrt{n/\log p} \times t_p / \sqrt{\kappa_1} \rightarrow \tilde{y} = 2/\sqrt{\kappa_1}$ . Similarly to Section A.7.2.1, we know  $\tilde{y}_n$  and  $\tilde{\xi}_k$ ,  $k = 1, \dots, n$  also satisfy the conditions of Lemma 6.8 in [4]. Thus by Lemma 6.8 in [4], for  $z_0 = -\log(8\pi) - 2 \log \log(1 - \alpha)^{-1}$  and  $t_p = n^{-1/2} \sqrt{4 \log p - \log \log p + z_0}$ ,

$$\begin{aligned} & P\left(\frac{\sum_{k=1}^n \tilde{\xi}_k}{\sqrt{n \log p}} \geq \tilde{y}_n\right) \\ & \simeq \frac{p^{-\tilde{y}_n^2/2} (\log p)^{-1/2}}{\sqrt{2\pi \tilde{y}}} \\ & = p^{-2/\kappa_1} (\log p)^{1/(2\kappa_1)-1/2} \frac{\exp(-z_0/(2\kappa_1))}{\sqrt{2\pi \tilde{y}}} \\ & \leq (8\pi)^{1/(2\kappa_1)} \frac{\sqrt{\kappa_1}}{2\sqrt{2\pi}} p^{-2/\kappa_1} (\log p)^{1/(2\kappa_1)-1/2} \{\log(1 - \alpha)^{-1}\}^{1/\kappa_1}. \end{aligned}$$

Then for  $\kappa_1 \leq 1$  and a small  $\alpha > 0$ ,

$$(A.7.9) \quad \begin{aligned} & \frac{1}{2} \sum_{(j_1, j_2) \in J_A^c} P\left(\sum_{k=1}^n x_{k, j_3} x_{k, j_4} / n \geq t_p\right) \\ & \leq \frac{1}{2} \frac{p(p-1) - |J_A|}{p^{2/\kappa_1} (\log p)^{-1/(2\kappa_1)+1/2}} (8\pi)^{1/(2\kappa_1)} \frac{\sqrt{\kappa_1}}{2\sqrt{2\pi}} \{\log(1 - \alpha)^{-1}\}^{1/\kappa_1}, \end{aligned}$$



which attains the maximum order at  $\kappa_1 = 1$ , when  $\kappa_1 \leq 1$  and  $n, p \rightarrow \infty$ . Therefore asymptotically, (A.7.9)  $\leq 2^{-1} \log(1 - \alpha)^{-1}$ . By similar arguments, we know when  $n, p \rightarrow \infty$ ,

$$\frac{1}{2} \sum_{(j_3, j_4) \in J_A^c} P\left(\sum_{k=1}^n x_{k, j_3} x_{k, j_4} / n \leq -t_p\right) \leq \frac{1}{2} \log(1 - \alpha)^{-1}.$$

In summary, we have (A.7.4) holds.

Combining (A.7.3) and (A.7.4), we obtain (A.7.2)  $\leq \log(1 - \alpha)^{-1}$ .  $\square$

**A.8. Conditions of Theorems 4.1–4.5.** The conditions of Theorem 4.1 are listed in the following Condition A.2.

CONDITION A.2.

- (1)  $\lim_{p \rightarrow \infty} \max_{1 \leq j \leq p} \mathbb{E}(x_j - \mu_j)^4 < \infty$ ;  $\lim_{p \rightarrow \infty} \min_{1 \leq j \leq p} \mathbb{E}(x_j - \mu_j)^2 > 0$ .
- (2)  $\mathbf{x}$  is  $\alpha$ -mixing with  $\alpha_x(s) \leq M\delta^s$ , where  $\delta \in (0, 1)$  and  $M > 0$  are some constants. In addition,  $\sum_{j_1, j_2=1}^p \sigma_{j_1, j_2}^a = \Theta(p)$ .

Condition A.2 is similar to Conditions 2.1 and 2.2 of Theorem 2.1. As the mean is a lower order moment function than the covariance, Condition A.2 (1) is weaker than Condition 2.1 in that only the fourth moments are needed to be uniformly bounded instead of the eighth moments. Condition A.2 (2) is a regularization condition of the structure of the covariance matrix.

The conditions of Theorem 4.2 are list in the following Condition A.3.

CONDITION A.3.

- (1) There exists constant  $B$  such that  $B^{-1} \leq \lambda_{\min}(\mathbf{\Sigma}) \leq \lambda_{\max}(\mathbf{\Sigma}) \leq B$ , where  $\lambda_{\min}(\mathbf{\Sigma})$  and  $\lambda_{\max}(\mathbf{\Sigma})$  denote the minimum and maximum eigenvalues of the covariance matrix  $\mathbf{\Sigma}$ ; and all correlations are bounded away from  $-1$  and  $1$ , i.e.,  $\max_{1 \leq j_1 \neq j_2 \leq p} |\sigma_{j_1, j_2}| / (\sigma_{j_1, j_2} \sigma_{j_2, j_2})^{1/2} < 1 - \eta$  for some  $\eta > 0$ .
- (2)  $\log p = o(n^{1/4})$ ;  $\max_{1 \leq j \leq p} \mathbb{E}[\exp(h(x_j - \mu_j)^2)] < \infty$ , for  $h \in [-M_1, M_1]$ , where  $M_1 > 0$  is some constant.
- (3)  $\{(x_{i,j}, i = 1, \dots, n) : 1 \leq j \leq p\}$  is  $\alpha$ -mixing with  $\alpha_x(s) \leq C\delta^s$ , where  $\delta \in (0, 1)$  and  $C > 0$  is some constant, and  $\sum_{j_1, j_2=1}^p \sigma_{j_1, j_2}^a = \Theta(p)$ .

In Condition A.3, (1) and (2) are assumed to establish the extreme value distribution of  $\mathcal{U}(\infty)$ , as in Cai et al. [6] and Xu et al. [28]. Furthermore, the

mixing condition in Condition (3) is used to establish the joint independence of finite order U-statistics and  $\mathcal{U}(\infty)$ , following the argument in Hsing [16].

The conditions of Theorems 4.3–4.5 are listed in the Condition A.4 below.

CONDITION A.4.

- (1) *There exists constant  $B$  such that  $B^{-1} \leq \lambda_{\min}(\Sigma_x) \leq \lambda_{\max}(\Sigma_x) \leq B$ , where  $\lambda_{\min}(\Sigma_x)$  and  $\lambda_{\max}(\Sigma_x)$  denote the minimum and maximum eigenvalues of  $\Sigma_x$ ; and all correlations are bounded away from  $-1$  and  $1$ , i.e.,  $\max_{1 \leq j_1 \neq j_2 \leq p} |\sigma_{x,j_1,j_2}| / (\sigma_{x,j_1,j_2} \sigma_{x,j_2,j_2})^{1/2} < 1 - \eta$  for some  $\eta > 0$ . In addition, we assume the same assumptions hold for  $\Sigma_y$ .*
- (2)  *$n, p \rightarrow \infty$ ,  $\log p = o(1)n^{1/4}$  and  $n_x/n \rightarrow \gamma \in (0, 1)$ . In addition,  $\max_{1 \leq j \leq p} \mathbb{E}[\exp(h(x_j - \mu_j)^2)] < \infty$  and  $\max_{1 \leq j \leq p} \mathbb{E}[\exp(h(y_j - \nu_j)^2)] < \infty$ , for  $h \in [-M, M]$ , where  $M$  is a positive constant.*
- (3)  *$\{(x_{i,j}, i = 1, \dots, n) : 1 \leq j \leq p\}$  and  $\{(y_{i,j}, i = 1, \dots, n) : 1 \leq j \leq p\}$  are  $\alpha$ -mixing with  $\alpha_x(s) \leq C\delta_x^s$  and  $\alpha_y(s) \leq C\delta_y^s$ , where  $\delta_x, \delta_y \in (0, 1)$  and  $C$  is some constant. We also assume  $\sum_{j_1, j_2=1}^p \{\sigma_{x,j_1,j_2}/\gamma + \sigma_{y,j_1,j_2}/(1-\gamma)\}^a = \Theta(p)$ .*

Condition A.4 is similar to Condition A.3. They are assumed to establish both the limiting distributions and asymptotic independence properties of  $\mathcal{U}(a)$  and  $\mathcal{U}(\infty)$  for testing two-sample mean.

### A.9. Proof of Theorems 4.1 and 4.2.

PROOF. Under  $H_0$ , for  $\mathcal{U}(a)$  in (4.1), we assume without loss of generality that  $\boldsymbol{\mu}_0 = \mathbf{0}$ , and then write  $\mathcal{U}(a) = \sum_{j=1}^p (P_a^n)^{-1} \sum_{1 \leq i_1 \neq \dots \neq i_a \leq n} \prod_{k=1}^a x_{i_k, j}$ .

We start with the proof of Theorem 4.1. Similarly to Section A.2, we first derive the variances and the covariances of the U-statistics; and then prove the asymptotic joint normality of the U-statistics. In particular, for  $\text{var}\{\mathcal{U}(a)\}$  in Theorem 4.1, as  $\mathbb{E}\{\mathcal{U}(a)\} = 0$  under  $H_0$ ,

$$\text{var}\{\mathcal{U}(a)\} = \mathbb{E}\{\mathcal{U}^2(a)\} = (P_a^n)^{-2} \sum_{\substack{1 \leq j_1 \leq p, \\ 1 \leq j_2 \leq p}} \sum_{\substack{1 \leq i_1 \neq \dots \neq i_a \leq n, \\ 1 \leq \tilde{i}_1 \neq \dots \neq \tilde{i}_a \leq n}} \mathbb{E}\left(\prod_{k=1}^a x_{i_k, j_1} x_{\tilde{i}_k, j_2}\right).$$

Note that  $\mathbb{E}(\prod_{k=1}^a x_{i_k, j_1} x_{\tilde{i}_k, j_2}) = 0$  when  $\{i_1, \dots, i_a\} \neq \{\tilde{i}_1, \dots, \tilde{i}_a\}$ ; and  $\mathbb{E}(\prod_{k=1}^a x_{i_k, j_1} x_{\tilde{i}_k, j_2}) = \sigma_{j_1, j_2}^a$  when  $\{i_1, \dots, i_a\} = \{\tilde{i}_1, \dots, \tilde{i}_a\}$ . Then

$$(A.9.1) \quad \text{var}\{\mathcal{U}(a)\} = (P_a^n)^{-1} \sum_{1 \leq j_1, j_2 \leq p} a! \sigma_{j_1, j_2}^a.$$

By Condition A.2,  $\sum_{1 \leq j_1, j_2 \leq p} \sigma_{j_1, j_2}^a = \Theta(p)$ . Thus  $\text{var}\{\mathcal{U}(a)\} = \Theta(pn^{-a})$ .

Second, we show that  $\text{cov}\{\mathcal{U}(a), \mathcal{U}(b)\} = 0$ . Note that  $\text{cov}\{\mathcal{U}(a), \mathcal{U}(b)\} = \text{E}\{\mathcal{U}(a)\mathcal{U}(b)\}$  under  $H_0$ , and

$$\text{E}\{\mathcal{U}(a)\mathcal{U}(b)\} = (P_a^n P_b^n)^{-1} \sum_{\substack{1 \leq j_1 \leq p, \\ 1 \leq j_2 \leq p}} \sum_{\substack{1 \leq i_1 \neq \dots \neq i_a \leq n, \\ 1 \leq \tilde{i}_1 \neq \dots \neq \tilde{i}_a \leq n}} \text{E}\left(\prod_{k=1}^a x_{i_k, j_1} \prod_{t=1}^b x_{\tilde{i}_t, j_2}\right).$$

Since  $a \neq b$ ,  $\{i_1, \dots, i_a\} \neq \{\tilde{i}_1, \dots, \tilde{i}_b\}$ . Suppose there exists an index  $i \in \{i_1, \dots, i_a\}$  and  $i \notin \{\tilde{i}_1, \dots, \tilde{i}_b\}$ . Then under  $H_0$ ,

$$\text{E}\left(\prod_{k=1}^a x_{i_k, j_1} \prod_{t=1}^b x_{\tilde{i}_t, j_2}\right) = \text{E}(x_{i, j}) \text{E}(\text{all the remaining terms}) = 0.$$

Therefore,  $\text{E}\{\mathcal{U}(a)\mathcal{U}(b)\} = 0$ .

In summary, the covariance matrix of  $[\mathcal{U}(a_1)/\sigma(a_1), \dots, \mathcal{U}(a_m)/\sigma(a_m)]^\top$  asymptotically converges to  $I_m$ . To finish the proof of Theorem 4.1, it remains to show that the joint limiting distribution of the U-statistics is normal. By the Cramér-Wold theorem, it is sufficient to prove that any fixed linear combination of these U-statistics converges to a normal distribution. Similarly to Section A.2, we use the martingale central limit theorem [2, p.476]. Specifically, we redefine  $Z_n$  as below with  $\sum_{r=1}^m t_r^2 = 1$ , and prove that

$$(A.9.2) \quad Z_n := \sum_{r=1}^m t_r \mathcal{U}(a_r) / \sigma(a_r) \xrightarrow{D} \mathcal{N}(0, 1).$$

With the redefined  $Z_n$ , we define  $\text{E}_k(\cdot)$  in the same way as in Section A.2, and still define  $D_{n,k} = (\text{E}_k - \text{E}_{k-1})Z_n$  and  $\pi_{n,k}^2 = \text{E}_{k-1}(D_{n,k}^2)$ . Similarly to Section A.2, we have  $D_{n,k} = (\text{E}_k - \text{E}_{k-1})Z_n = \sum_{r=1}^m t_r A_{n,k,a_r}$ , where we redefine  $A_{n,k,a_r} = (\text{E}_k - \text{E}_{k-1})\{\mathcal{U}(a_r)/\sigma(a_r)\}$ . In addition, similarly to Lemma A.2.4, we obtain that when  $k < a_r$ ,  $A_{n,k,a_r} = 0$ ; and when  $k \geq a_r$ ,

$$A_{n,k,a_r} = \frac{a_r}{\sigma(a_r) P_{a_r}^n} \sum_{j=1}^p \sum_{1 \leq i_1 \neq \dots \neq i_{a_r-1} \leq k-1} x_{k,j} \times \prod_{t=1}^{a_r-1} x_{i_t, j}.$$

Given the form of  $A_{n,k,a_r}$ , we can obtain the forms of  $D_{n,k}$  and  $\pi_{n,k}^2$ . To prove (A.5.2), by the martingale central limit theorem, it suffices to prove the following Lemma A.9.1.

LEMMA A.9.1. *Under the conditions of Theorem 4.1,  $\text{var}(\sum_{k=1}^n \pi_{n,k}^2) \rightarrow 0$  and  $\sum_{k=1}^n \text{E}(D_{n,k}^4) \rightarrow 0$ .*

PROOF. See Section B.5 on Page 123.  $\square$

With Lemma A.9.1, the asymptotic joint normality in Theorem 4.1 is obtained by the martingale central limit theorem. For Theorem 4.2, the limiting distribution of  $\mathcal{U}(\infty)$  follows from Cai et al. [6]. In addition, the asymptotic independence between  $\mathcal{U}(a)/\sigma(a)$  and  $n\mathcal{U}(\infty) - \tau_p$  can be obtained similarly as the proof of Theorem 4.4. We defer the details to Section A.11.

**A.10. Proof of Theorem 4.3.** By the following Proposition A.1, we assume that under  $H_0$ ,  $\boldsymbol{\mu} = \boldsymbol{\nu} = \mathbf{0}$ , without loss of generality.

PROPOSITION A.1.  $\mathcal{U}(a)$  constructed in (4.2) and (4.3) are location invariant; that is, for any vector  $\boldsymbol{\Delta} \in \mathbb{R}^p$ , the U-statistic constructed based on the transformed data  $\{\mathbf{x}_i + \boldsymbol{\Delta} : i = 1, \dots, n_x\}$  and  $\{\mathbf{y}_i + \boldsymbol{\Delta} : i = 1, \dots, n_y\}$  is still  $\mathcal{U}(a)$ .

Proposition A.1 can be obtained straightforwardly from the definitions  $\mathcal{U}(a) = \sum_{j=1}^p (P_a^{n_x} P_a^{n_y})^{-1} \times \sum_{\substack{1 \leq k_1 \neq \dots \neq k_a \leq n_x \\ 1 \leq s_1 \neq \dots \neq s_a \leq n_y}} \prod_{t=1}^a (x_{k_t, j} - y_{s_t, j})$  in (4.2), and  $\mathcal{U}(\infty) = \max_{1 \leq j \leq p} \sigma_{j,j}^{-1} \times (\bar{x}_j - \bar{y}_j)^2$  in (4.3). The proof is thus skipped.

The following proof proceeds by deriving the variances, covariances and asymptotic joint normality of the U-statistics. Particularly, the next Lemma A.10.1 derives the asymptotic form of  $\sigma^2(a)$  in Theorem 4.3.

LEMMA A.10.1. Under the conditions of Theorem 4.3,

$$\text{var}\{\mathcal{U}(a)\} \simeq \sum_{1 \leq j_1, j_2 \leq p} a! \left( \frac{\sigma_{x, j_1, j_2}}{n_x} + \frac{\sigma_{y, j_1, j_2}}{n_y} \right)^a = \Theta(pn^{-a}).$$

When  $\sigma_{x, j_1, j_2} = \sigma_{y, j_1, j_2} = \sigma_{j_1, j_2}$ , we have  $\text{var}[\mathcal{U}(a)] \simeq \sum_{j_1, j_2=1}^p a!(n_x + n_y)^a \sigma_{j_1, j_2}^a / (n_x n_y)^a$ .

PROOF. See Section B.6.1 on Page 127.  $\square$

In addition, the following Lemma A.10.2 shows that different  $\mathcal{U}(a)$ 's of finite  $a$  are uncorrelated.

LEMMA A.10.2. Under the conditions of Theorem 4.3, for finite integers  $a \neq b$ ,  $\text{cov}\{\mathcal{U}(a), \mathcal{U}(b)\} = 0$ .

PROOF. See Section B.6.2 on Page 128.  $\square$

We then know  $\text{cov}\{\mathcal{U}(a_1)/\sigma(a_1), \dots, \mathcal{U}(a_m)/\sigma(a_m)\} = I_m$  by Lemmas A.10.1 and A.10.2. The next Lemma A.10.3 further proves the asymptotic joint normality of the U-statistics.

LEMMA A.10.3. *Under the conditions of Theorem 4.3, for finite integers  $a_1, \dots, a_m$ ,  $\{\mathcal{U}(a_1)/\sigma(a_1), \dots, \mathcal{U}(a_m)/\sigma(a_m)\} \xrightarrow{D} \mathcal{N}(0, I_m)$ .*

PROOF. *See Section B.6.3 on Page 129.* □

Combining Lemmas A.10.1–A.10.3, we finish the proof of Theorem 4.3.

**A.11. Proof of Theorem 4.4.** For  $\mathcal{U}(\infty)$  in (4.3), the limiting distribution of  $\mathcal{U}(\infty)$  is established in Cai et al. [6] and [28]. We next prove the asymptotic independence between  $\mathcal{U}(\infty)$  and  $\mathcal{U}(a)$  by a similar argument to that in Hsing [16], see also [28]. In this proof, we reserve the notation  $P$  for the probability measure on which  $x_{i,j}$  and  $y_{i,j}$  are defined, and the expectation with respect to  $P$  is denoted as  $E$ . Define  $\tilde{\mathcal{U}}_c(a)/\sigma(a)$  on the conditional probability measure  $\tilde{P}$ , given the event  $n_x n_y \mathcal{U}(\infty)/(n_x + n_y) - \tau_p \leq u$  such that

$$\begin{aligned} & \tilde{P}\left\{\tilde{\mathcal{U}}_c(a)/\sigma(a) \leq u'\right\} \\ &= P\left\{\mathcal{U}(a)/\sigma(a) \leq u' \mid \frac{n_x n_y}{n_x + n_y} \mathcal{U}(\infty) \leq \tau_p + u\right\}. \end{aligned}$$

The expectation with respect to  $\tilde{P}$  is denoted by  $\tilde{E}$ . To show the asymptotic independence, it is sufficient to prove the following Lemma A.11.1.

LEMMA A.11.1. *Under the conditions of Theorem 4.4,  $\tilde{\mathcal{U}}_c(a)/\sigma(a) \xrightarrow{D} \mathcal{N}(0, 1)$  on the conditional measure  $\tilde{P}$ .*

PROOF. *See Section B.7 on Page 133.* □

**A.12. Proof of Theorem 4.5.** By Proposition A.1, we assume  $E(\mathbf{y}) = \boldsymbol{\nu} = \mathbf{0}$ , without loss of generality. Then under the considered alternative  $\mathcal{E}_A$ ,  $E(\mathbf{x}) = \boldsymbol{\mu} = \{\mu_j = \rho : j = 1, \dots, k_0; \mu_j = 0 : j = k_0 + 1, \dots, p\}$ . Define  $\varphi_{j_1, j_2} = \sigma_{j_1, j_2} + \mu_{j_1} \mu_{j_2}$ . We have  $E(x_{i, j_1} x_{i, j_2}) = \varphi_{j_1, j_2}$ , and under  $\boldsymbol{\nu} = \mathbf{0}$ ,  $E(y_{i, j_1} y_{i, j_2}) = \sigma_{j_1, j_2}$ .

Similarly to the proof of Theorem 2.5 in Section A.5, we decompose

$\mathcal{U}(a) = T_{a,1} + T_{a,2}$ , where

$$(A.12.1) \quad T_{a,1} = \sum_{j=1}^{k_0} \sum_{c=0}^a \sum_{\substack{1 \leq k_1 \neq \dots \neq k_c \leq n_x, \\ 1 \leq s_1 \neq \dots \neq s_{a-c} \leq n_y}} G(a, c) \prod_{t=1}^c x_{k_t, j} \prod_{m=1}^{a-c} y_{s_m, j},$$

$$T_{a,2} = \sum_{j=k_0+1}^p \sum_{c=0}^a \sum_{\substack{1 \leq k_1 \neq \dots \neq k_c \leq n_x, \\ 1 \leq s_1 \neq \dots \neq s_{a-c} \leq n_y}} G(a, c) \prod_{t=1}^c x_{k_t, j} \prod_{m=1}^{a-c} y_{s_m, j},$$

with  $G(a, c) = (-1)^{a-c} \binom{a}{c} (P_c^{n_x} P_{a-c}^{n_y})^{-1}$ . Then  $E(T_{a,1}) = \sum_{j=1}^{k_0} (\mu_j - \nu_j)^a = k_0 \rho^a$  and  $E(T_{a,2}) = \sum_{j=k_0+1}^p (\mu_j - \nu_j)^a = 0$ .

To prove Theorem 4.5, we derive the variances, covariances, and asymptotic joint normality of the U-statistics. Particularly, the next Lemma A.12.1 gives the asymptotic form of  $\sigma^2(a) = \text{var}\{\mathcal{U}(a)\}$ , and shows that  $T_{a,2}$  is the leading component.

LEMMA A.12.1. *Under the conditions of Theorem 4.5,*

$$(A.12.2) \quad \text{var}\{\mathcal{U}(a)\} \simeq \sum_{k_0+1 \leq j_1, j_2 \leq p} a! \left( \frac{\sigma_{x, j_1, j_2}}{n_x} + \frac{\sigma_{y, j_1, j_2}}{n_y} \right)^a.$$

$\text{var}(T_{a,2}) = \Theta(pn^{-a})$  and  $\text{var}(T_{a,1}) = o(1)\text{var}(T_{a,2})$ . It follows that  $\{T_{a,1} - E(T_{a,1})\}/\sigma(a) \xrightarrow{P} 0$ .

PROOF. See Section B.8.1 on Page 135.  $\square$

In addition, the following Lemma A.12.2 shows that the covariance between two U-statistics asymptotically converges to 0.

LEMMA A.12.2. *Under the conditions of Theorem 4.5, for two finite integers  $a \neq b$ ,  $\{\sigma(a)\sigma(b)\}^{-1} \text{cov}\{\mathcal{U}(a), \mathcal{U}(b)\} \rightarrow 0$ .*

PROOF. See Section B.8.2 on Page 138.  $\square$

By the analysis above, we know that the covariance matrix of  $[\{\mathcal{U}(a_1) - E[\mathcal{U}(a_1)]\}/\sigma(a_1), \dots, \{\mathcal{U}(a_m) - E[\mathcal{U}(a_m)]\}/\sigma(a_m)]^\top$  asymptotically converges to  $I_m$ . To prove Theorem 4.5, it remains to show that the joint limiting distribution of the U-statistics is normal. By the Cramér-Wold theorem, it is equivalent to prove that any fixed linear combination of these U-statistics converges to a normal distribution. By Lemma A.12.1 and the Slutsky's theorem, it suffices to show that any fixed linear combination of

$[T_{a_1,2}/\sqrt{\text{var}(T_{a_1,2})}, \dots, T_{a_m,2}/\sqrt{\text{var}(T_{a_m,2})}]^\top$  converges to a normal distribution for any finite  $m$ . Since  $\mu_j = \nu_j$  for  $j \in \{k_0 + 1, \dots, p\}$ , and each  $T_{a_t,2}$  is a summation over  $j \in \{k_0 + 1, \dots, p\}$ , we know the analysis under  $H_0$  in Section A.10 can be applied to  $T_{a_t,2}$  similarly. Given  $k_0 = o(p)$ , we know  $[T_{a_1,2}/\sqrt{\text{var}(T_{a_1,2})}, \dots, T_{a_m,2}/\sqrt{\text{var}(T_{a_m,2})}]^\top$  has the joint asymptotic normality. In summary, Theorem 4.5 is proved.

**A.13. Proof of Theorem 4.6.** We first provide the details of the conditions of Theorem 4.6 in Section A.13.1 and then prove Theorem 4.6 in Section A.13.2.

A.13.1. *Conditions of Theorem 4.6.* Theorem 4.6 can be proved by the following Condition A.5 or Condition A.6. Note that Conditions A.5 and A.6 are assumed under  $H_0$ , where  $\Sigma_x = \Sigma_y = \Sigma = (\sigma_{j_1, j_2})_{p \times p}$ .

CONDITION A.5.

- (1)  $n, p \rightarrow \infty$ , and  $n_x/n \rightarrow \gamma \in (0, 1)$ .
- (2)  $\lim_{p \rightarrow \infty} \max_{1 \leq j \leq p} \mathbb{E}(x_j - \mu_j)^8 < \infty$ ;  $\lim_{p \rightarrow \infty} \min_{1 \leq j \leq p} \mathbb{E}(x_j - \mu_j)^2 > 0$ ;  $\lim_{p \rightarrow \infty} \max_{1 \leq j \leq p} \mathbb{E}(y_j - \nu_j)^8 < \infty$ ; and  $\lim_{p \rightarrow \infty} \min_{1 \leq j \leq p} \mathbb{E}(y_j - \nu_j)^2 > 0$ .
- (3)  $\{(x_{i,j}, i = 1, \dots, n) : 1 \leq j \leq p\}$  and  $\{(y_{i,j}, i = 1, \dots, n) : 1 \leq j \leq p\}$  are  $\alpha$ -mixing with  $\alpha_x(s) \leq C\delta_x^s$  and  $\alpha_y(s) \leq C\delta_y^s$ , where  $\delta_x, \delta_y \in (0, 1)$  and  $C$  is some constant.
- (4) For any finite integer  $a$ ,  $\sum_{1 \leq j_1, j_2, j_3, j_4 \leq p} (\sigma_{j_1, j_3} \sigma_{j_2, j_4})^a = \Theta(p^2)$ .

Condition A.5 (2) is similar to Condition 2.1. Condition A.5 (3) assumes  $\alpha$ -mixing on the two samples, which is similar to Condition 2.2. Condition A.5 (4) is a regularity condition on the covariance structure, and it is naturally satisfied for even  $a$ , given Condition A.5 (3).

Alternatively, we introduce another set of conditions similar to Condition 2.2\*. We define some notation. Suppose  $(z_1, \dots, z_p)^\top \sim \mathcal{N}(\mathbf{0}, \Sigma)$ . Given indexes  $1 \leq j_1, \dots, j_t \leq p$ , define  $\Pi_{j_1, \dots, j_t}^0 = \mathbb{E}(\prod_{k=1}^t z_{j_k})$ . Moreover, we define  $\Pi_{j_1, \dots, j_t}^x = \mathbb{E}\{\prod_{k=1}^t (x_{j_k} - \mu_{j_k})\}$  and  $\Pi_{j_1, \dots, j_t}^y = \mathbb{E}\{\prod_{k=1}^t (y_{j_k} - \nu_{j_k})\}$ . In addition, for given integers  $a$  and  $b$ , let  $\mathbb{G}_{a,b}$  be a collection of tuples  $\mathcal{G} = (g_1, g_2, \dots, g_{4(a+b)-1}, g_{4(a+b)}) \in \{1, \dots, 8\}^{4(a+b)}$ , which satisfies that  $g_{2t-1} \neq g_{2t}$  for  $t = 1, \dots, 2(a+b)$ , and the number of  $g$ 's equal to  $m$  is  $a$  for  $m \in \{1, 2, 3, 4\}$  and is  $b$  for  $m \in \{5, 6, 7, 8\}$ . For any  $\mathcal{G} \in \mathbb{G}_{a,b}$ , we define  $\mathbb{V}_{a,b,\mathcal{G}} = \sum_{1 \leq j_1, \dots, j_8 \leq p} \prod_{t=1}^{2(a+b)} \sigma_{j_{g_{2t-1}}, j_{g_{2t}}}$ , and let  $S_{\mathcal{G}}$  denote the number of distinct sets among the  $2(a+b)$  number of sets,  $\{g_{2t-1}, g_{2t}\}$ , for  $t = 1, \dots, 2(a+b)$ , induced by  $\mathcal{G}$ . Note that generally  $S_{\mathcal{G}} \geq 4$ , and

when  $S_{\mathcal{G}} = 4$ , by the symmetricity of  $j$  indexes,  $\mathbb{V}_{a,b,\mathcal{G}} = \mathbb{V}_{a,b,0}$  where  $\mathbb{V}_{a,b,0} := \sum_{1 \leq j_1, \dots, j_8 \leq p} \sum_{1 \leq j_1, \dots, j_8 \leq p} \sigma_{j_1, j_2}^a \sigma_{j_3, j_4}^a \sigma_{j_5, j_6}^b \sigma_{j_7, j_8}^b$ .

CONDITION A.6.

- (1)  $n, p \rightarrow \infty$ , and  $n_x/n \rightarrow \gamma \in (0, 1)$ .
- (2)  $\lim_{p \rightarrow \infty} \max_{1 \leq j \leq p} \mathbb{E}(x_j - \mu_j)^8 < \infty$ ;  $\lim_{p \rightarrow \infty} \min_{1 \leq j \leq p} \mathbb{E}(x_j - \mu_j)^2 > 0$ ;  $\lim_{p \rightarrow \infty} \max_{1 \leq j \leq p} \mathbb{E}(y_j - \nu_j)^8 < \infty$ ; and  $\lim_{p \rightarrow \infty} \min_{1 \leq j \leq p} \mathbb{E}(y_j - \nu_j)^2 > 0$ .
- (3) For  $t = 3, 4, 6, 8$ , there exist constants  $\kappa_{x,t}, \kappa_{y,t} \geq 1$  such that  $\Pi_{j_1, \dots, j_t}^x = \kappa_{x,t} \Pi_{j_1, \dots, j_t}^0$  and  $\Pi_{j_1, \dots, j_t}^y = \kappa_{y,t} \Pi_{j_1, \dots, j_t}^0$ .
- (4) For  $a, b \in \{a_1, \dots, a_m\}$ , and any  $\mathcal{G} \in \mathbb{G}_{a,b}$  define above, if  $S_{\mathcal{G}} > 4$ , we assume  $\mathbb{V}_{a,b,\mathcal{G}} = o(1)\mathbb{V}_{a,b,0}$ .

We note that Condition A.6 (3) and (4) are alternative dependence assumptions to Condition A.5 (3) and (4). Condition A.6 (3) is an extension from Condition 2.2\*, and is also satisfied when the distributions of  $\mathbf{x}$  and  $\mathbf{y}$  follow elliptical distributions [19]. Condition A.6 (4) implies some weak dependence structure in covariance matrix  $\Sigma$ . To better illustrate the condition, we consider the case when  $a = b = 2$  as an example. We note that

$$\mathbb{V}_{a,b,0} = \sum_{1 \leq j_1, \dots, j_8 \leq p} (\sigma_{j_1, j_2} \sigma_{j_3, j_4} \sigma_{j_5, j_6} \sigma_{j_7, j_8})^2 = \{\text{tr}(\Sigma^2)\}^4,$$

and  $\mathbb{V}_{a,b,0} = \mathbb{V}_{a,b,\mathcal{G}}$  when  $\mathcal{G} = (1, 2, 3, 4, 5, 6, 7, 8, 1, 2, 3, 4, 5, 6, 7, 8)$  with  $S_{\mathcal{G}} = 4$ . Moreover, if  $\mathcal{G} = (1, 3, 2, 4, 1, 2, 3, 4, 5, 6, 7, 8, 5, 6, 7, 8)$  with  $S_{\mathcal{G}} = 6$ ,

$$\mathbb{V}_{a,b,\mathcal{G}} = \sum_{1 \leq j_1, \dots, j_8 \leq p} (\sigma_{j_1, j_3} \sigma_{j_2, j_4}) (\sigma_{j_1, j_2} \sigma_{j_3, j_4}) (\sigma_{j_5, j_6} \sigma_{j_7, j_8})^2 = \text{tr}(\Sigma^4) \{\text{tr}(\Sigma^2)\}^2;$$

if  $\mathcal{G} = (1, 3, 2, 4, 1, 2, 3, 4, 5, 7, 6, 8, 5, 6, 7, 8)$  with  $S_{\mathcal{G}} = 8$ ,

$$\mathbb{V}_{a,b,\mathcal{G}} = \sum_{1 \leq j_1, \dots, j_8 \leq p} (\sigma_{j_1, j_3} \sigma_{j_2, j_4}) (\sigma_{j_1, j_2} \sigma_{j_3, j_4}) (\sigma_{j_5, j_7} \sigma_{j_6, j_8}) (\sigma_{j_5, j_6} \sigma_{j_7, j_8}) = \{\text{tr}(\Sigma^4)\}^2;$$

if  $\mathcal{G} = (1, 6, 2, 5, 3, 7, 4, 8, 1, 3, 2, 4, 5, 7, 6, 8)$  with  $S_{\mathcal{G}} = 8$ ,

$$\mathbb{V}_{a,b,\mathcal{G}} = \sum_{1 \leq j_1, \dots, j_8 \leq p} (\sigma_{j_1, j_6} \sigma_{j_2, j_5}) (\sigma_{j_3, j_7} \sigma_{j_4, j_8}) (\sigma_{j_1, j_3} \sigma_{j_2, j_4}) (\sigma_{j_5, j_7} \sigma_{j_6, j_8}) = \text{tr}(\Sigma^8).$$

In this case, Condition A.6 (4) is equivalent to  $\text{tr}(\Sigma^4) = o[\{\text{tr}(\Sigma^2)\}^2]$  and  $\text{tr}(\Sigma^8) = o[\{\text{tr}(\Sigma^2)\}^4]$ , which are similarly assumed in [22]. In addition, we consider another example where the  $p \times p$  covariance matrix  $\Sigma$  is of banded structure with bandwidth  $s$  and has the nonzero entries being positive constants. It follows that  $\mathbb{V}_{a,b,0} = \Theta(p^4 s^4)$  and  $\mathbb{V}_{a,b,\mathcal{G}} = O(p^3 s^5)$  when  $S_{\mathcal{G}} > 4$ . Therefore, in this example, Condition A.6 (4) is satisfied when  $s = o(p)$ .



A.13.2. *Proof of Theorem 4.6.* Since  $\mathcal{U}(a)$  is location invariant, we assume  $E(\mathbf{x}) = \mathbf{0}$  and  $E(\mathbf{y}) = \mathbf{0}$ , without loss of generality, in this section. We decompose  $\mathcal{U}(a) = \tilde{\mathcal{U}}(a) + \tilde{\mathcal{U}}^*(a)$ , where we redefine

$$\tilde{\mathcal{U}}(a) = \sum_{1 \leq j_1, j_2 \leq p} \frac{1}{F_a^{n_x} F_a^{n_y}} \sum_{\substack{1 \leq i_1 \neq \dots \neq i_a \leq n_x; \\ 1 \leq w_1 \neq \dots \neq w_a \leq n_y}} \prod_{t=1}^a (x_{i_t, j_1} x_{i_t, j_2} - y_{w_t, j_1} y_{w_t, j_2}),$$

and  $\tilde{\mathcal{U}}^*(a) = \mathcal{U}(a) - \tilde{\mathcal{U}}(a)$ . To prove Theorem 4.6, we derive the variances, covariances, and asymptotic joint normality of the U-statistics. Particularly, the following Lemma A.13.1 derives the asymptotic form of  $\text{var}\{\mathcal{U}(a)\}$ , and shows that  $\tilde{\mathcal{U}}(a)$  is the leading term.

LEMMA A.13.1. *Under the conditions of Theorem 4.6,  $\text{var}\{\tilde{\mathcal{U}}^*(a)\} = o(1)\text{var}\{\tilde{\mathcal{U}}(a)\}$ ,  $\mathcal{U}^*(a)/\sigma(a) \xrightarrow{P} 0$ , and*

$$\begin{aligned} & \text{var}\{\mathcal{U}(a)\} \\ \simeq & \sum_{1 \leq j_1, j_2, j_3, j_4 \leq p} a! \left\{ \frac{1}{n_x} (\Pi_{j_1, j_2, j_3, j_4}^x - \sigma_{j_1, j_2} \sigma_{j_3, j_4}) + \frac{1}{n_y} (\Pi_{j_1, j_2, j_3, j_4}^y - \sigma_{j_1, j_2} \sigma_{j_3, j_4}) \right\}^a. \end{aligned}$$

*In particular, under Condition A.5,  $\text{var}\{\mathcal{U}(a)\} = \Theta(p^2 n^{-a})$ ; under Condition A.6,  $\text{var}\{\mathcal{U}(a)\} = \Theta(n^{-a}) \sum_{1 \leq j_1, j_2, j_3, j_4 \leq p} (\sigma_{j_1, j_3} \sigma_{j_2, j_4})^a$ .*

PROOF. See Section B.9.1 on Page 138.  $\square$

Given Lemma A.13.1, the next Lemma A.13.2 shows that the covariance between two U-statistics asymptotically converges to 0.

LEMMA A.13.2. *Under the conditions of Theorem 4.6, for finite integers  $a \neq b$ ,  $\text{cov}\{\mathcal{U}(a)/\sigma(a), \mathcal{U}(b)/\sigma(b)\} \rightarrow 0$  as  $n, p \rightarrow \infty$ .*

PROOF. See Section B.9.2 on Page 144.  $\square$

To finish the proof, it remains to obtain the joint asymptotic normality of  $[\mathcal{U}(a_1)/\sigma(a_1), \dots, \mathcal{U}(a_m)/\sigma(a_m)]^\top$  for different finite integers  $a_1, \dots, a_m$ . By Cramér-Wold theorem, it is equivalent to prove that any of their fixed linear combination converges to normal. In addition, by Lemma A.13.1 and the Slutsky's theorem, it suffices to prove that any fixed linear combination of  $[\tilde{\mathcal{U}}(a_1)/\sigma(a_1), \dots, \tilde{\mathcal{U}}(a_m)/\sigma(a_m)]^\top$  converges to normal. Specifically, similarly to Section A.2, we redefine  $Z_n$  as below with  $\sum_{r=1}^m t_r^2 = 1$ , and prove that

$$(A.13.1) \quad Z_n := \sum_{r=1}^m t_r \tilde{\mathcal{U}}(a_r)/\sigma(a_r) \xrightarrow{D} \mathcal{N}(0, 1).$$

We next prove (A.13.1) following the proof of Theorem 2.1 in Section A.2 and apply the martingale central limit theorem [2, p.476].

To construct a martingale difference, we write  $\mathbf{x}_i = (x_{i,1}, \dots, x_{i,p})^\top$  and  $\mathbf{y}_i = (y_{i,1}, \dots, y_{i,p})^\top$ ; and define a new random vector

$$R_i = \mathbf{x}_i \quad \text{for } i = 1, 2, \dots, n_x; \quad R_{n_x+j} = \mathbf{y}_j \quad \text{for } j = 1, 2, \dots, n_y.$$

We then define  $\mathcal{F}_0 = \{\emptyset, \Omega\}$  and  $\mathcal{F}_k = \sigma\{R_1, \dots, R_k\}$  for  $k = 1, 2, \dots, n_x + n_y$ ; and let  $\mathbf{E}_k(\cdot)$  denote the conditional expectation given  $\mathcal{F}_k$  for  $k = 1, \dots, n_x + n_y$ . Define  $D_{n,k} = (\mathbf{E}_k - \mathbf{E}_{k-1})Z_n$  and  $\pi_{n,k}^2 = \mathbf{E}_{k-1}(D_{n,k}^2)$ . It follows that  $Z_n = \sum_{k=1}^n D_{n,k}$  as  $\mathbf{E}_0(Z_n) = \mathbf{E}(Z_n) = 0$ . To prove (A.13.1), by the martingale central limit theorem, it suffices to prove

$$(A.13.2) \quad \sum_{k=1}^n \pi_{n,k}^2 / \text{var}(Z_n) \xrightarrow{P} 1 \quad \text{and} \quad \sum_{k=1}^n \mathbf{E}(D_{n,k}^4) / \text{var}^2(Z_n) \rightarrow 0.$$

To prove (A.13.2), we derive the explicit forms of  $D_{n,k}$  and  $\pi_{n,k}^2$  in Section B.9.3. Similarly to Section A.2, the following Lemma A.13.3 and Lemma A.13.4 suggest that (A.13.2) holds.

LEMMA A.13.3. *Under the conditions of Theorem 4.6,  $\text{var}(\sum_{k=1}^{n_x+n_y} \pi_{n,k}^2) \rightarrow 0$ .*

PROOF. *See Section B.9.4 on Page 147.* □

LEMMA A.13.4. *Under the conditions of Theorem 4.6,  $\sum_{k=1}^{n_x+n_y} \mathbf{E}(D_{n,k}^4) \rightarrow 0$ .*

PROOF. *See Section B.9.5 on Page 154.* □

In summary, Theorem 4.6 is proved.

**A.14. Proof of Theorem 4.7.** In this section, we first provide the conditions of Theorem 4.7 in Section A.14.1 and then prove Theorem 4.7 in Section A.14.2.

A.14.1. *Conditions.* Theorem 4.7 is established under the following Conditions A.7 and A.8, where Condition A.7 is the same as Condition A.6 (1)–(3).

CONDITION A.7.

(1)  $n, p \rightarrow \infty$ , and  $n_x/n \rightarrow \gamma \in (0, 1)$ .

- (2)  $\lim_{p \rightarrow \infty} \max_{1 \leq j \leq p} \mathbf{E}(x_j - \mu_j)^8 < \infty$ ;  $\lim_{p \rightarrow \infty} \min_{1 \leq j \leq p} \mathbf{E}(x_j - \mu_j)^2 > 0$ ;  $\lim_{p \rightarrow \infty} \max_{1 \leq j \leq p} \mathbf{E}(y_j - \nu_j)^8 < \infty$ ; and  $\lim_{p \rightarrow \infty} \min_{1 \leq j \leq p} \mathbf{E}(y_j - \nu_j)^2 > 0$ .
- (3) For  $t = 3, 4, 6, 8$ , there exist  $\kappa_{x,t}, \kappa_{y,t} \geq 1$  such that  $\Pi_{j_1, \dots, j_t}^x = \kappa_{x,t} \Pi_{j_1, \dots, j_t}^0$  and  $\Pi_{j_1, \dots, j_t}^y = \kappa_{y,t} \Pi_{j_1, \dots, j_t}^0$ .

To provide Condition A.8, we first define some notation. The difference between  $\Sigma_x$  and  $\Sigma_y$  is defined as  $D_{x,y} = \Sigma_x - \Sigma_y = (D_{j_1, j_2})_{p \times p}$ . Let  $\mathbb{J}_0 \subseteq \{1, \dots, p\}$  be the largest set such that for any  $j_1, j_2 \in \mathbb{J}_0$ ,  $\sigma_{x, j_1, j_2} = \sigma_{y, j_1, j_2}$ . Define  $J_{0,D} = \{(j_1, j_2) : j_1 \text{ or } j_2 \notin \mathbb{J}_0\}$ . Given  $\mathbb{J}_0$  and  $a, b \in \{a_1, \dots, a_m\}$ , we define  $\mathbb{V}_{a,b,0,0} = \sum_{j_1, \dots, j_8 \in \mathbb{J}_0} (\sigma_{x, j_1, j_2} \sigma_{x, j_3, j_4})^a (\sigma_{x, j_5, j_6} \sigma_{x, j_7, j_8})^b$ , which also equals to  $\sum_{j_1, \dots, j_8 \in \mathbb{J}_0} (\sigma_{y, j_1, j_2} \sigma_{y, j_3, j_4})^a (\sigma_{y, j_5, j_6} \sigma_{y, j_7, j_8})^b$  by the definition of  $\mathbb{J}_0$ . In addition, for any tuple  $\mathcal{G} = (g_1, g_2, \dots, g_{4(a+b)-1}, g_{4(a+b)}) \in \mathbb{G}_{a,b}$  specified in Condition A.6, we define  $\mathbb{V}_{a,b,\mathcal{G},0} = \sum_{j_1, \dots, j_8 \in \mathbb{J}_0} \prod_{t=1}^{2(a+b)} \sigma_{j_{g_{2t-1}}, j_{g_{2t}}}$ . Note that  $\mathbb{V}_{a,b,0,0}$  and  $\mathbb{V}_{a,b,\mathcal{G},0}$  are defined similarly to  $\mathbb{V}_{a,b,0}$  and  $\mathbb{V}_{a,b,\mathcal{G}}$  in Condition A.6 by changing the range of  $j$  indexes from  $\{1, \dots, p\}$  to  $\mathbb{J}_0$ . Moreover, let  $\mathcal{H} = \{(h_1, h_2), (h_3, h_4)\} \in \mathbb{H}$ , where  $\mathbb{H}$  includes  $\{(1, 2), (3, 4)\}$ ,  $\{(1, 3), (2, 4)\}$  and  $\{(1, 4), (2, 3)\}$ . For any  $a \in \{a_1, \dots, a_m\}$  and given  $\mathcal{H} \in \mathbb{H}$ , define

$$(A.14.1) \quad \begin{aligned} \mathbb{V}_{a,\mathcal{H},x,1} &= \sum_{(j_1, j_2), (j_3, j_4) \in J_{0,D}} |\sigma_{x, j_{h_1}, j_{h_2}} \sigma_{x, j_{h_3}, j_{h_4}}|^a \\ \mathbb{V}_{a,\mathcal{H},x,2} &= \sum_{(j_1, j_2), (j_3, j_4) \in J_{0,D}} |D_{j_{h_1}, j_{h_2}} \sigma_{x, j_{h_3}, j_{h_4}}|^a, \\ \mathbb{V}_{a,\mathcal{H},D,3} &= \sum_{(j_1, j_2), (j_3, j_4) \in J_{0,D}} |D_{j_{h_1}, j_{h_2}} D_{j_{h_3}, j_{h_4}}|^a. \end{aligned}$$

Similarly, we also define  $\mathbb{V}_{a,\mathcal{H},y,1}$  and  $\mathbb{V}_{a,\mathcal{H},y,2}$  by replacing  $\sigma_x$ 's with  $\sigma_y$ 's. We next present Condition A.8 of Theorem 4.7.

CONDITION A.8. For any  $a, b \in \{a_1, \dots, a_m\}$ ,  $\mathcal{G} \in \mathbb{G}_{a,b}$ , and  $\mathcal{H} \in \mathbb{H}$ , we assume (A1)  $\mathbb{V}_{a,b,\mathcal{G},0} = o(1) \mathbb{V}_{a,b,0,0}$ ; (A2)  $\mathbb{V}_{a,\mathcal{H},D,3} = O(n^{-a}) \mathbb{V}_{a,a,0,0}^{1/2}$ ; and (A3)  $\mathbb{V}_{a,\mathcal{H},x,t} = o(1) \mathbb{V}_{a,a,0,0}^{1/2}$ , for  $t = 1, 2$ .

Equivalently we can also replace (A3) in Condition A.8 by (A3)\*  $\mathbb{V}_{a,\mathcal{H},y,t} = o(1) \mathbb{V}_{a,a,0,0}^{1/2}$ , for  $t = 1, 2$ . This is because by  $D_{j_1, j_2} = \sigma_{x, j_1, j_2} - \sigma_{y, j_1, j_2}$  and Hölder's inequality, we know (A2) and (A3) induce (A3)\*; and (A2) and (A3)\* also induce (A3). Thus it is equivalent to assume (A3) or (A3)\* in Condition A.8.

We next discuss Condition A.8. Let  $\Sigma_C = \{\sigma_{x, j_1, j_2} : j_1, j_2 \in \mathbb{J}_0\} = \{\sigma_{y, j_1, j_2} : j_1, j_2 \in \mathbb{J}_0\}$ , which is the common submatrix of  $\Sigma_x$  and  $\Sigma_y$

by the definition of  $\mathbb{J}_0$ . In Condition A.8, (A1) implies some weak dependence structure of  $\Sigma_C$  similar to Condition A.6 (4). We consider an example where  $\Sigma_x$  has the banded structure with the bandwidth  $s$  and the entries being positive constants. Then (A1) holds if  $s = o(p)$ . Moreover, under the considered example,  $\mathbb{V}_{a,a,0,0}^{1/2} = (\sum_{j_1, j_2 \in \mathbb{J}_0} \sigma_{x, j_1, j_2}^a)^2 \geq C|\mathbb{J}_0|^4$  and  $\mathbb{V}_{a, \mathcal{H}, x, 1} \leq C|J_{0,D}|^2 = C_2(p - |\mathbb{J}_0|)^4$ . Then (A3) for  $t = 1$  holds when  $p - |\mathbb{J}_0| = o(p)$ , which implies that the number of entries that are different in  $\Sigma_x$  and  $\Sigma_y$  is  $o(p^2)$ . In addition, (A2) and (A3) for  $t = 2$  are regularity conditions on the difference matrix  $D_{x,y}$ . For illustration, we consider an example where  $D_{j_1, j_2} = \rho > 0$  for any  $(j_1, j_2) \in J_{0,D}$ , and  $\Sigma_x = I_p$ . Then  $\mathbb{V}_{a,a,0,0}^{1/2} = |\mathbb{J}_0|^2$ ,  $\mathbb{V}_{a, \mathcal{H}, x, 2} \leq |J_{0,D}| \rho^a p$ , and  $\mathbb{V}_{a, \mathcal{H}, D, 3} \leq |J_{0,D}|^2 \rho^{2a}$ . Under this example, (A2) and (A3) of  $t = 2$  hold if  $|J_{0,D}| \rho^a = O(n^{-a/2} p)$  and  $|\mathbb{J}_0| \simeq p$ , which are similar to the assumption in Theorem 2.5.

A.14.2. *Proof.* In this section, we prove Theorem 4.7 under Conditions A.7 and A.8. Recall that we decompose  $\mathcal{U}(a) = \tilde{\mathcal{U}}(a) + \tilde{\mathcal{U}}^*(a)$  in Section A.13. We further decompose  $\tilde{\mathcal{U}}(a) = T_{D,a,1} + T_{D,a,2}$ , where

$$T_{D,a,1} = \sum_{j_1, j_2 \in \mathbb{J}_0} \frac{1}{P_a^{n_x} P_a^{n_y}} \sum_{\substack{1 \leq i_1 \neq \dots \neq i_a \leq n_x; \\ 1 \leq w_1 \neq \dots \neq w_a \leq n_y}} \prod_{t=1}^a (x_{i_t, j_1} x_{i_t, j_2} - y_{w_t, j_1} y_{w_t, j_2}),$$

$$T_{D,a,2} = \sum_{(j_1, j_2) \in J_{0,D}} \frac{1}{P_a^{n_x} P_a^{n_y}} \sum_{\substack{1 \leq i_1 \neq \dots \neq i_a \leq n_x; \\ 1 \leq w_1 \neq \dots \neq w_a \leq n_y}} \prod_{t=1}^a (x_{i_t, j_1} x_{i_t, j_2} - y_{w_t, j_1} y_{w_t, j_2}).$$

It follows that  $\mathcal{U}(a) = T_{D,a,1} + T_{D,a,2} + \tilde{\mathcal{U}}^*(a)$ . To prove Theorem 4.7, we derive the variances, covariances and asymptotic joint normality of the U-statistics. In particular, next Lemma A.14.1 derives the asymptotic form of  $\text{var}\{\mathcal{U}(a)\}$ , and shows that  $T_{D,a,1}$  is the leading component.

LEMMA A.14.1. *Under the conditions of Theorem 4.7,*

$$\text{var}\{\mathcal{U}(a)\} \simeq \sum_{1 \leq j_1, j_2, j_3, j_4 \in \mathbb{J}_0} a! C_{\kappa, a} \sigma_{j_1, j_2}^a \sigma_{j_3, j_4}^a,$$

where  $C_{\kappa, a} = \{(\kappa_x - 1)/n_x + (\kappa_y - 1)/n_y\}^a + 2(\kappa_x/n_x + \kappa_y/n_y)^a$ . In addition,  $\text{var}(T_{D,a,2}) = o(1)\text{var}(T_{D,a,1})$  and  $\text{var}\{\tilde{\mathcal{U}}^*(a)\} = o(1)\text{var}\{\mathcal{U}(a)\}$ . It follows that  $\{T_{D,a,2} - \mathbb{E}(T_{D,a,2})\}/\sigma(a) \xrightarrow{P} 0$  and  $\{\tilde{\mathcal{U}}^*(a) - \mathbb{E}\{\tilde{\mathcal{U}}^*(a)\}\}/\sigma(a) \xrightarrow{P} 0$ .

PROOF. See Section B.10.1 on Page 156.  $\square$

Lemma A.14.1 gives that  $\{T_{D,a,2} - \mathbb{E}(T_{D,a,2})\}/\sigma(a) \xrightarrow{P} 0$  and  $[\tilde{\mathcal{U}}^*(a) - \mathbb{E}\{\tilde{\mathcal{U}}^*(a)\}]/\sigma(a) \xrightarrow{P} 0$ . Thus by Slutsky's theorem, to prove Theorem 4.7, it suffices to prove

$$(A.14.2) \quad \left[ \frac{T_{D,a_1,1}}{\sqrt{\text{var}(T_{D,a_1,1})}}, \dots, \frac{T_{D,a_m,1}}{\sqrt{\text{var}(T_{D,a_m,1})}} \right] \xrightarrow{D} \mathcal{N}(\mathbf{0}, I_m).$$

Note that  $T_{D,a,1}$  is a summation over  $j$  indexes in  $\mathbb{J}_0$ , and by the definition of  $\mathbb{J}_0$ ,  $\sigma_{x,j_1,j_2} = \sigma_{y,j_1,j_2}$  for any  $j_1, j_2 \in \mathbb{J}_0$ . Therefore the analysis under  $H_0$  can be similarly applied to  $T_{D,a,1}$ . Given Condition A.7 and Condition A.8 (A1), we can obtain (A.14.2) similarly as in Section A.13.2. In summary, Theorem 4.7 is proved.

**A.15. Proof of Proposition 4.2.** In this section, we prove Proposition 4.2. Under the considered example, as  $p - |\mathbb{J}_0| = o(p)$ , we have  $\sum_{j_1, j_2, j_3, j_4 \in \mathbb{J}_0} \sigma_{x,j_1,j_2}^a \sigma_{x,j_3,j_4}^a \simeq \{p\nu^{2a} + 2 \sum_{t=1}^s h_t^a(p-t)\}^2$ . Then by Lemma A.14.1, when  $n_x = n_y = n/2$ ,

$$(A.15.1) \quad \text{var}\{\mathcal{U}(a)\} \simeq (n/2)^{-a} a! (2\kappa_1^a + \kappa_2^a) \left\{ p\nu^{2a} + 2 \sum_{t=1}^s h_t^a(p-t) \right\}^2,$$

where  $\kappa_1 = \kappa_x + \kappa_y$  and  $\kappa_2 = \kappa_x + \kappa_y - 2$ .

Recall that  $\rho_a$  is defined to be the value such that when  $\rho = \rho_a$  under the alternative,  $\mathbb{E}\{\mathcal{U}(a)\}/\sqrt{\text{var}\{\mathcal{U}(a)\}} \simeq M$  for given  $M$ . By (A.15.1),  $\rho_a$  satisfies

$$|J_D|^2 \rho_a^{2a} = M^2 (n/2)^{-a} a! (2\kappa_1^a + \kappa_2^a) \left\{ p\nu^{2a} + 2 \sum_{t=1}^s h_t^a(p-t) \right\}^2.$$

We next obtain

$$\rho_a = \frac{(a!)^{\frac{1}{2a}} \sqrt{\kappa_1} \nu}{(n/2)^{1/2}} \left( \frac{Mp}{|J_D|} \right)^{1/a} \left\{ 2 + \left( \frac{\kappa_2}{\kappa_1} \right)^a \right\}^{\frac{1}{2a}} \left\{ 1 + 2 \sum_{t=1}^s \left( \frac{h_t}{\nu^2} \right)^a \left( 1 - \frac{t}{p} \right) \right\}^{\frac{1}{a}}.$$

Let  $\tilde{M} = Mp/|J_D|$ ,  $\tilde{h}_t = h_t/\nu^2$ ,  $\tilde{\nu} = \sqrt{\kappa_1} \nu$ , and  $\tilde{\kappa}_r = \kappa_2/\kappa_1$ . It follows that

$$\rho_a = \tilde{\nu} (a!)^{\frac{1}{2a}} (n/2)^{-1/2} (\tilde{M})^{\frac{1}{a}} (2 + \tilde{\kappa}_r^a)^{\frac{1}{2a}} \left\{ 1 + 2 \sum_{t=1}^s \tilde{h}_t^a \left( 1 - \frac{t}{p} \right) \right\}^{\frac{1}{a}}.$$

Similarly to Section A.6, we study  $\rho_a$  as a function of integer  $a$  and show that if  $\rho_a$  starts to not decrease at some value, it will increase afterwards.

Specifically, we show that when  $\rho_{a+1}/\rho_a \geq 1$ ,  $\rho_{a+2}/\rho_{a+1} > 1$ . Note that

$$\begin{aligned} \frac{\rho_{a+1}}{\rho_a} &= \left[ \frac{(a+1)! \tilde{M}^2 (2 + \tilde{\kappa}_r^{a+1}) \left\{ 1 + 2 \sum_{t=1}^s \tilde{h}_t^{a+1} \left( 1 - \frac{t}{p} \right) \right\}^2}{(a!)^{1+\frac{1}{a}} \tilde{M}^{2+\frac{2}{a}} (2 + \tilde{\kappa}_r^a)^{1+\frac{1}{a}} \left\{ 1 + 2 \sum_{t=1}^s \tilde{h}_t^a \left( 1 - \frac{t}{p} \right) \right\}^{2(1+\frac{1}{a})}} \right]^{\frac{1}{2(a+1)}} \\ &= \{\mathbb{D}(a) \tilde{M}^{-2}\}^{\frac{1}{2a(a+1)}}, \end{aligned}$$

where  $\mathbb{D}(a) = \mathbb{D}_1(a) \times \mathbb{D}_2(a) \times \mathbb{D}_3(a)$  with  $\mathbb{D}_1(a) = (a+1)^a/a!$ ,  $\mathbb{D}_2(a) = (2 + \tilde{\kappa}_r^{a+1})^a/(2 + \tilde{\kappa}_r^a)^{a+1}$  and

$$\mathbb{D}_3(a) = \left\{ 1 + 2 \sum_{t=1}^s \tilde{h}_t^{a+1} \left( 1 - \frac{t}{p} \right) \right\}^{2a} / \left\{ 1 + 2 \sum_{t=1}^s \tilde{h}_t^a \left( 1 - \frac{t}{p} \right) \right\}^{2(a+1)}.$$

It follows that  $\rho_{a+1}/\rho_a > 1$  and  $\rho_{a+1}/\rho_a = 1$  are equivalent to  $\mathbb{D}(a) > \tilde{M}^2$  and  $\mathbb{D}(a) = \tilde{M}^2$ , respectively.

We next show that  $\mathbb{D}(a)$  is a strictly increasing functions of  $a$  as  $\mathbb{D}_1(a+1)/\mathbb{D}_1(a) > 1$ ,  $\mathbb{D}_2(a+1)/\mathbb{D}_2(a) \geq 1$  and  $\mathbb{D}_3(a+1)/\mathbb{D}_3(a) \geq 1$ . Particularly,

$$\frac{\mathbb{D}_1(a+1)}{\mathbb{D}_1(a)} = \frac{(a+2)^{a+1}}{(a+1)!} \frac{a!}{(a+1)^a} = \left( 1 + \frac{1}{a+1} \right)^{a+1} > 1;$$

$$\frac{\mathbb{D}_2(a+1)}{\mathbb{D}_2(a)} = \frac{(2 + \tilde{\kappa}_r^{a+2})^{a+1}}{(2 + \tilde{\kappa}_r^{a+1})^{a+2}} \times \frac{(2 + \tilde{\kappa}_r^a)^{a+1}}{(2 + \tilde{\kappa}_r^a)^a} = \left\{ \frac{(2 + \tilde{\kappa}_r^{a+2})(2 + \tilde{\kappa}_r^a)}{(2 + \tilde{\kappa}_r^{a+1})^2} \right\}^{a+1} \geq 1,$$

where we use  $2\tilde{\kappa}_r^{a+1} \leq \tilde{\kappa}_r^{a+2} + \tilde{\kappa}_r^a$  by the inequality of arithmetic and geometric means; and

$$\frac{\mathbb{D}_3(a+1)}{\mathbb{D}_3(a)} = \left[ \frac{\left\{ 1 + 2 \sum_{t=1}^s \tilde{h}_t^{a+2} \left( 1 - \frac{t}{p} \right) \right\} \left\{ 1 + 2 \sum_{t=1}^s \tilde{h}_t^a \left( 1 - \frac{t}{p} \right) \right\}}{\left\{ 1 + 2 \sum_{t=1}^s \tilde{h}_t^{a+1} \left( 1 - \frac{t}{p} \right) \right\}^2} \right]^{4(a+1)} \geq 1,$$

where we use  $\sum_{t=1}^s \tilde{h}_t^{a+2} (1-t/p) + \sum_{t=1}^s \tilde{h}_t^a (1-t/p) \geq 2 \sum_{t=1}^s \tilde{h}_t^{a+1} (1-t/p)$  by the inequality of arithmetic and geometric means and  $\left\{ \sum_{t=1}^s \tilde{h}_t^{a+2} (1-t/p) \right\} \left\{ \sum_{t=1}^s \tilde{h}_t^a (1-t/p) \right\} \geq \left\{ \sum_{t=1}^s \tilde{h}_t^{a+1} (1-t/p) \right\}^2$  by Hölder's inequality. In summary,  $\mathbb{D}(a+1)/\mathbb{D}(a) > 1$ , and thus  $\mathbb{D}(a)$  is a strictly increasing function of  $a$ .

Given the monotonicity of  $\mathbb{D}(a)$ , we know that if  $\mathbb{D}(a) \geq \tilde{M}^2$ ,  $\mathbb{D}(a+1) > \tilde{M}^2$ ; equivalently this implies that if  $\rho_{a+1} \geq \rho_a$ ,  $\rho_{a+2} > \rho_{a+1}$ . Suppose  $a_0$  is the first integer such that  $\mathbb{D}(a_0) \geq \tilde{M}^2$ , i.e., for any integer  $1 \leq a < a_0$ ,  $\mathbb{D}(a) < \tilde{M}^2$ . By the analysis above, we know  $\rho_a$  is decreasing when  $a < a_0$ ,

and  $\rho_a$  is strictly increasing when  $a > a_0$ . Thus  $a_0$  achieves the minimum of  $\rho_a$ . Since  $\mathbb{D}(a)$  is strictly increasing in  $a$ , we know  $a_0 < \infty$  given  $\tilde{M}$ , and  $a_0$  increases as  $\tilde{M}$  increases.

Moreover, as  $s = o(p)$ , there exists some constant  $C$  such that

$$\mathbb{D}(1) = \frac{2 + \tilde{\kappa}_r^2}{(2 + \tilde{\kappa}_r)^2} \times \frac{\{1 + 2 \sum_{t=1}^s \tilde{h}_t^2 (1 - t/p)\}^2}{\{1 + 2 \sum_{t=1}^s \tilde{h}_t (1 - t/p)\}^4} \geq \mathbb{D}_0,$$

where

$$\mathbb{D}_0 = C \times \frac{2 + \tilde{\kappa}_r^2}{(2 + \tilde{\kappa}_r)^2} \times \frac{\{1 + 2 \sum_{t=1}^s \tilde{h}_t^2\}^2}{\{1 + 2 \sum_{t=1}^s \tilde{h}_t\}^4},$$

and we have  $\mathbb{D}_0 = \Theta(1/s^2)$ . Therefore, when  $\mathbb{D}_0 \geq \tilde{M}^2$ , i.e.,  $|J_D| \geq Mp/\sqrt{\mathbb{D}_0}$ , we know  $\mathbb{D}(1) \geq \tilde{M}^2$  and the minimum of  $\mathbb{D}(a)$  is achieved at  $a_0 = 1$ . This indicates that the minimum of  $\rho_a$  is achieved at  $a_0 = 1$ .

### A.16. Results on the Generalized Linear Model in Section 4.3.

A.16.1. *Limiting results and power analysis.* We have shown that the U-statistics framework can be used to test means and covariance matrices. Here we give an example of generalized linear models to show that the framework can be extended to other testing problems.

Consider a response variable  $y$  and covariates  $\mathbf{x} = (x_1, \dots, x_p)^\top$  following a generalized linear model

$$(A.16.1) \quad \mathbb{E}(y|\mathbf{x}) = g^{-1}(\mathbf{x}^\top \boldsymbol{\beta}),$$

where  $g$  is the canonical link function and  $\boldsymbol{\beta}$  is the regression coefficients of interest. We are interested in testing:  $H_0 : \boldsymbol{\beta} = \boldsymbol{\beta}_0$  versus  $H_A : \boldsymbol{\beta} \neq \boldsymbol{\beta}_0$ . We define the score vector  $\mathbf{S} = (S_1, \dots, S_p)^\top$  for  $\boldsymbol{\beta}$  in (A.16.1), where  $S_j = (y - \mu_0)x_j$ ,  $1 \leq j \leq p$  with  $\mu_0 = g^{-1}(\mathbf{x}^\top \boldsymbol{\beta}_0)$ . Given that  $E(S_j) = 0$  under  $H_0$ , the target parameters can be considered as  $\mathcal{E} = \{E(S_j) : j = 1, \dots, p\}$ .

Suppose that  $(\mathbf{x}_i, y_i)$ ,  $i = 1, \dots, n$ , are  $n$  i.i.d. observations. Many existing tests for generalized linear models [see, e.g., 11, 27] are based on the score vectors  $\mathbf{S}_i = (S_{i,1}, \dots, S_{i,p})^\top$ , where  $S_{i,j} = (y_i - \mu_{0,i})x_{i,j}$ . Note that  $\mathbf{S}_i$ 's are i.i.d. copies of  $\mathbf{S}$  with mean  $(E(S_1), \dots, E(S_p))^\top$  and the covariance matrix denoted by  $\boldsymbol{\Sigma} = \{\sigma_{j_1, j_2} : 1 \leq j_1, j_2 \leq p\}$ . Therefore,  $K_j(\mathbf{x}_i, y_i) = S_{i,j} = (y_i - \mu_{0,i})x_{i,j}$  provides a simple kernel function. Following (1.1),  $\mathcal{U}(a) = \sum_{j=1}^p (P_a^n)^{-1} \sum_{1 \leq i_1 \neq \dots \neq i_a \leq n} \prod_{k=1}^a S_{i_k, j}$ , which is an unbiased estimator of  $\|\mathcal{E}\|_a^a = \sum_{j=1}^p \{E(S_j)\}^a$  for finite integers  $a$ . Moreover, we define  $\mathcal{U}(\infty) = \max_{1 \leq j \leq p} \sigma_{j,j}^{-1} (\sum_{i=1}^n S_{i,j}/n)^2$ , which corresponds to the  $\|\mathcal{E}\|_\infty$ .

Asymptotic results of the U-statistics are stated below, where we assume the conditions similar to that of Theorem 4.1.

## CONDITION A.9.

- (1) There exists constant  $B$  such that  $B^{-1} \leq \lambda_{\min}(\boldsymbol{\Sigma}) \leq \lambda_{\max}(\boldsymbol{\Sigma}) \leq B$ , where  $\lambda_{\min}(\boldsymbol{\Sigma})$  and  $\lambda_{\max}(\boldsymbol{\Sigma})$  denote the minimum and maximum eigenvalues of the covariance matrix  $\boldsymbol{\Sigma}$ ; and all correlations are bounded away from  $-1$  and  $1$ , i.e.,  $\max_{1 \leq j_1 \neq j_2 \leq p} |\sigma_{j_1, j_2}| / (\sigma_{j_1, j_1} \sigma_{j_2, j_2})^{1/2} < 1 - \eta$  for some  $\eta > 0$ .
- (2)  $\log p = o(1)n^{1/4}$  and  $\max_{1 \leq j \leq p} \mathbb{E}[\exp\{h(S_j - \mathbb{E}(S_j))^2\}] < \infty$ , for  $h \in [-M, M]$ , where  $M$  is a positive constant.
- (3) Similarly to Condition 2.2,  $\{(S_{i,j}, i = 1 \dots, n) : 1 \leq j \leq p\}$  is  $\alpha$ -mixing with  $\alpha_S(s) \leq C\delta^s$ , where  $\delta \in (0, 1)$  and  $C$  is some constant. In addition, for finite integer  $a$ ,  $\sum_{j_1, j_2=1}^p \sigma_{j_1, j_2}^a = \Theta(p)$ .

**THEOREM A.16.1.** Under Condition A.9 and  $H_0: \boldsymbol{\beta} = \boldsymbol{\beta}_0$ , for any finite integers  $(a_1, \dots, a_m)$ , as  $n, p \rightarrow \infty$ ,  $[\mathcal{U}(a_1)/\sigma(a_1), \dots, \mathcal{U}(a_m)/\sigma(a_m)]^\top \xrightarrow{D} \mathcal{N}(0, I_m)$ , where  $\sigma^2(a) = \sum_{i=1}^p \sum_{j=1}^p \sigma_{i,j}^a / P_a^n$ , which is of order  $\Theta(pn^{-a})$ . Besides,  $P(n\mathcal{U}(\infty) - \tau_p \leq u) \rightarrow \exp\{-\pi^{-1/2} \exp(-u/2)\}$ ,  $\forall u \in \mathbb{R}$ , where  $\tau_p = 2 \log p - \log \log p$ . In addition, for any finite integer  $a$ ,  $\{\mathcal{U}(a)/\sigma(a)\}$  and  $\{n\mathcal{U}(\infty) - \tau_p\}$  are asymptotically independent.

Next we compare the power of  $\mathcal{U}(a)$ 's under alternatives with different sparsity levels. Similarly to the mean testing problems, we consider the alternative  $\mathcal{E}_A = \{\mathbb{E}(S_j) = \rho > 0$  for  $j = 1, \dots, k_0; \mathbb{E}(S_j) = 0$  for  $j = k_0 + 1, \dots, p\}$ , where  $k_0$  denotes the number of nonzero entries.

**THEOREM A.16.2.** Assume Condition A.9 and  $k_0 = o(p)$ . For any finite integers  $\{a_1, \dots, a_m\}$ , if  $\rho$  in  $\mathcal{E}_A$  satisfies  $\rho = O(k_0^{-1/a_t} p^{1/(2a_t)} n^{-1/2})$  for  $t = 1, \dots, m$ , then  $[\mathcal{U}(a_1) - \mathbb{E}\{\mathcal{U}(a_1)\}]/\sigma(a_1), \dots, [\mathcal{U}(a_m) - \mathbb{E}\{\mathcal{U}(a_m)\}]/\sigma(a_m)]^\top \xrightarrow{D} \mathcal{N}(0, I_m)$ , as  $n, p \rightarrow \infty$ . In addition,  $\mathbb{E}[\mathcal{U}(a)] = \|\mathcal{E}_A\|_a^a = k_0 \rho^a$  and

$$\sigma^2(a) \simeq \sum_{j_1=k_0+1}^p \sum_{j_2=k_0+1}^p a! \sigma_{j_1, j_2}^a / P_a^n,$$

which is  $\Theta(a!pn^{-a})$ .

Theorem A.16.2 shows that under the considered local alternatives, the asymptotic power of  $\mathcal{U}(a)$  mainly depends on  $\mathbb{E}\{\mathcal{U}(a)\} / \sqrt{\text{var}\{\mathcal{U}(a)\}}$ . Therefore, for a given constant  $M > 0$ , if  $\rho = \rho_a$  defined as  $\rho_a = M^{1/a} k_0^{-1/a} a^{1/(2a)} \times (\sum_{j_1=k_0+1}^p \sum_{j_2=k_0+1}^p \sigma_{j_1, j_2}^a)^{1/(2a)} n^{-1/2}$ , we know that different  $\mathcal{U}(a)$ 's asymptotically have the same power. For illustration, we further assume that  $\sigma_{j,j} =$



1 when  $j \in \{k_0 + 1, \dots, p\}$ , and  $\sigma_{j_1, j_2} = 0$  when  $j_1 \neq j_2 \in \{k_0 + 1, \dots, p\}$ , then

$$(A.16.2) \quad \rho_a \simeq (M\sqrt{p}/k_0)^{\frac{1}{a}} a!^{\frac{1}{2a}} n^{-\frac{1}{2}}.$$

Therefore, following the analysis in Section 4.1, to find the “best”  $\mathcal{U}(a)$ , it suffices to find the order, denoted by  $a_0$ , that gives the smallest  $\rho_a$  value in (A.16.2). Since (A.16.2) is only different from (4.4) by a constant that does not depend on the order  $a$ , Proposition 4.1 still holds. Consider  $a_0 \geq 1$  as specified in Proposition 4.1; then, similar to results in the two-sample mean testing, we know when  $k_0 \geq \sqrt{Mp}$ ,  $a_0 = 1$  and  $\mathcal{U}(1)$  is “better” than  $\mathcal{U}(\infty)$ ; when  $k_0 < C_1\sqrt{p}/\log^{a_0/2} p$  for some  $C_1$ ,  $\mathcal{U}(\infty)$  is the “best”; and when  $C_2\sqrt{p}/\log^{a_0/2} p < k_0 < \sqrt{Mp}$  for some  $C_2$ ,  $\mathcal{U}(a_0)$  is the “best”. In addition, given the similar results obtained in Theorem A.16.1 and power analysis, we can also develop adaptive testing procedure similar to that in Section 2.3.

REMARK A.1. *More generally, if the generalized linear model also has covariates  $\mathbf{z}$  that we want to adjust for, the corresponding generalized linear model becomes  $E(y|\mathbf{x}) = g^{-1}(\mathbf{x}^\top \boldsymbol{\beta} + \mathbf{z}^\top \boldsymbol{\alpha})$ , where  $\boldsymbol{\alpha}$  denote the regression coefficients for  $\mathbf{z}$ . To test  $H_0 : \boldsymbol{\beta} = \boldsymbol{\beta}_0$  v.s.  $H_A : \boldsymbol{\beta} \neq \boldsymbol{\beta}_0$ , we can replace  $\mu_{0,j}$  by  $\hat{\mu}_{0,j} = g^{-1}(\mathbf{x}_i^\top \boldsymbol{\beta}_0 + \mathbf{z}_i^\top \hat{\boldsymbol{\alpha}})$  where  $\hat{\boldsymbol{\alpha}}$  is an estimator of  $\boldsymbol{\alpha}$ . For instance, when  $\mathbf{z}$  is low dimensional, we can take  $\hat{\boldsymbol{\alpha}}$  as the maximum likelihood estimator under  $H_0$ . Then similar conclusion to Theorem A.16.1 can be derived under certain regularity conditions. We present simulation studies on generalized linear model in [Supplementary Material Section C.3.1](#) to illustrate the good performance of the U-statistics and we leave the details of theoretical developments with nuisance parameters for future study.*

A.16.2. *Proof of Theorems A.16.1 and A.16.2 (on Page 32).* Theorem A.16.1 is proved following the proof of Theorem 4.1 in Section A.9. Specifically, the arguments in Section A.9 can be applied to proving Theorem A.16.1 by replacing  $x_{i,j}$ ’s with  $S_{i,j}$ ’s, and therefore the details are skipped.

The proof of Theorem A.16.2 is similar to the proof of Theorem 4.5 in Section A.12. In particular, we decompose  $\mathcal{U}(a) = T_{a,1} + T_{a,2}$ , where we redefine

$$T_{a,1} = \sum_{j=1}^{k_0} \frac{1}{P^n} \sum_{1 \leq i_1 \neq \dots \neq i_a \leq n} \prod_{k=1}^a S_{i_k, j}, \quad T_{a,2} = \sum_{j=k_0+1}^p \frac{1}{P^n} \sum_{1 \leq i_1 \neq \dots \neq i_a \leq n} \prod_{k=1}^a S_{i_k, j}.$$

Note that  $T_{a,2}$  is a summation over  $j \in \{k_0 + 1, \dots, p\}$  and  $E(S_j) = 0$  for  $j \in \{k_0 + 1, \dots, p\}$ . Thus the conclusions similar to that in Theorem A.16.1

hold for  $T_{a,2}$ . Specifically, we have  $\text{var}(T_{a,2}) = \Theta\{(p - k_0)n^{-a}\}$  and

$$(A.16.3) \quad \left[ T_{a_1,2}/\sqrt{\text{var}(T_{a_1,2})}, \dots, T_{a_m,2}/\sqrt{\text{var}(T_{a_m,2})} \right] \xrightarrow{D} \mathcal{N}(0, I_m).$$

When  $\text{var}(T_{a,1}) = o(1)\text{var}(T_{a,2})$ , which will be proved later, we have  $\sigma^2(a) \simeq \text{var}(T_{a,2})$  and  $\{T_{a,1} - \mathbb{E}(T_{a,1})\}/\sigma(a) \xrightarrow{P} 0$ . By the Slutsky's theorem and (A.16.3), Theorem A.16.2 is proved.

To finish the proof of Theorem A.16.2, it remains to prove  $\text{var}(T_{a,1}) = o(1)\text{var}(T_{a,2})$ . The analysis above gives that  $\text{var}(T_{a,2}) = \Theta\{(p - k_0)n^{-a}\}$ . As  $k_0 = o(p)$ , to prove  $\text{var}(T_{a,1}) = o(1)\text{var}(T_{a,2})$ , it suffices to show  $\text{var}(T_{a,1}) = o(pn^{-a})$ . Note that  $\text{var}(T_{a,1}) = \mathbb{E}(T_{a,1}^2) - \{\mathbb{E}(T_{a,1})\}^2$ ,  $\mathbb{E}(T_{a,1}) = k_0\rho^a$ , and

$$\mathbb{E}(T_{a,1}^2) = \frac{1}{(P_a^n)^2} \sum_{1 \leq j_1, j_2 \leq k_0} \sum_{\substack{1 \leq i_1 \neq \dots \neq i_a \leq n; \\ 1 \leq \tilde{i}_1 \neq \dots \neq \tilde{i}_a \leq n}} \mathbb{E} \left\{ \prod_{k=1}^a (S_{i_k, j_1} S_{\tilde{i}_k, j_2}) \right\}.$$

For  $0 \leq b \leq a$ , define an event  $B_{S,b} = \{\{i_1, \dots, i_a\} \cap \{\tilde{i}_1, \dots, \tilde{i}_a\} \text{ is of size } b\}$  and correspondingly

$$G_{S,a,2,b} = (P_a^n)^{-2} \sum_{1 \leq j_1, j_2 \leq k_0} \sum_{\substack{1 \leq i_1 \neq \dots \neq i_a \leq n; \\ 1 \leq \tilde{i}_1 \neq \dots \neq \tilde{i}_a \leq n}} \mathbb{E} \left\{ \prod_{k=1}^a (S_{i_k, j_1} S_{\tilde{i}_k, j_2}) \times \mathbf{1}_{B_{S,b}} \right\}.$$

Then  $\mathbb{E}(T_{a,1}^2) = \sum_{b=0}^a G_{S,a,2,b}$ . To prove  $\mathbb{E}(T_{a,1}^2) - \{\mathbb{E}(T_{a,1})\}^2 = o(pn^{-a})$ , we show  $G_{S,a,2,0} - \{\mathbb{E}(T_{a,1})\}^2 = o(pn^{-a})$  and  $\sum_{b=1}^a G_{S,a,2,b} = o(pn^{-a})$ , respectively.

When  $b = 0$ ,  $\{i_1, \dots, i_a\} \cap \{\tilde{i}_1, \dots, \tilde{i}_a\} = \emptyset$ , and it follows that  $G_{S,a,2,0} = (P_a^n)^{-2} k_0^2 P_{2a}^n \rho^{2a}$ . By  $\mathbb{E}(T_{a,1}) = k_0\rho^a$  and  $k_0^2\rho^{2a} = O(pn^{-a})$ , we have  $|G_{S,a,2,0} - \{\mathbb{E}(T_{a,1})\}^2| = o(k_0^2\rho^{2a}) = o(pn^{-a})$ . When  $b \geq 1$ ,

$$G_{S,a,2,b} = C(P_a^n)^{-2} \sum_{1 \leq j_1, j_2 \leq k_0} P_{2a-b}^n (\sigma_{j_1, j_2} + \rho^2)^b \rho^{2(a-b)}.$$

The maximum order of  $G_{S,a,2,b}$  is bounded by the following two quantities:

$$(A.16.4) \quad \sum_{1 \leq j_1, j_2 \leq k_0} \frac{P_{2a-b}^n}{(P_a^n)^2} \sigma_{j_1, j_2}^b \rho^{2(a-b)},$$

$$(A.16.5) \quad \sum_{1 \leq j_1, j_2 \leq k_0} \frac{P_{2a-b}^n}{(P_a^n)^2} \rho^{2a}.$$

For (A.16.4), as  $b \geq 1$ , by Condition A.9 (3) and Lemma B.0.1, (A.16.4) =  $O\{k_0 n^{-b} \rho^{2(a-b)}\}$ . As  $k_0 = o(p)$  and  $\rho = O(k_0^{-1/a} p^{1/(2a)} n^{-1/2})$ , we know (A.16.4) =  $o(pn^{-a})$ . For (A.16.5), when  $b \geq 1$ , (A.16.5) =  $O(k_0^2 n^{-b} \rho^{2a}) = o(k_0^2 \rho^{2a}) = o(pn^{-a})$ . In summary, we have  $|\text{var}(T_{a,1})| \leq \{E(T_{a,1})\}^2 - G_{S,a,2,0} + \sum_{b=1}^a |G_{S,a,2,b}| = o(pn^{-a})$ . Therefore, Theorem A.16.2 is proved.

## APPENDIX B: ASSISTED LEMMAS

In the following Sections B.1–B.10, we provide the proofs of all the assisted lemmas used in Section A. The proofs of Remark 2.4 and Corollary 4.1 are provided in Sections B.11 and B.12, respectively. To facilitate the presentation of the proofs, we first introduce some notation and then provide four technical Lemmas B.0.1–B.0.4.

*Notation.* We define some notation to simplify the representation of summations in the following proofs. For  $a < n$ ,  $\mathcal{P}(n, a)$  denotes the collection of  $a$ -tuples  $\mathbf{i} = (i_1, \dots, i_a)$  satisfying  $1 \leq i_1 \neq \dots \neq i_a \leq n$ . Given  $\mathbf{i} \in \mathcal{P}(n, a)$ , we define  $\{\mathbf{i}\}$  as the corresponding set containing the elements of  $\mathbf{i}$  without order, that is,  $\{\mathbf{i}\} = \{i_1, \dots, i_a\}$ . We apply usual set operations on the corresponding set of  $\{\mathbf{i}\}$ . For example,  $|\{\mathbf{i}\}|$  denotes the size of the set  $\{i_1, \dots, i_a\}$ , which is  $a$  in this case. In addition, for any two integers  $a, b < n$ , and two tuples  $\mathbf{i} \in \mathcal{P}(n, a)$  and  $\mathbf{m} \in \mathcal{P}(n, b)$ , the operations  $\{\mathbf{i}\} \cup \{\mathbf{m}\}$  and  $\{\mathbf{i}\} \cap \{\mathbf{m}\}$  give the sets that equal to the union  $\{i_1, \dots, i_a\} \cup \{m_1, \dots, m_b\}$  and intersection  $\{i_1, \dots, i_a\} \cap \{m_1, \dots, m_b\}$  respectively. Moreover, we write  $\{\mathbf{i}\} = \{\mathbf{m}\}$  and  $\{\mathbf{i}\} \neq \{\mathbf{m}\}$  to indicate that the two sets  $\{i_1, \dots, i_a\}$  and  $\{m_1, \dots, m_b\}$  contain the same elements or not respectively.

In addition, let  $\mathcal{C}(n, a)$  denote the collection of  $a$ -tuples  $\mathbf{i} = (i_1, \dots, i_a)$  satisfying  $1 \leq i_1, \dots, i_a \leq n$  without constraining the elements to be different. Similarly, we define  $\{\mathbf{i}\}$  as the set containing the elements of  $\mathbf{i}$  without order, and the set operations also apply similarly as above. Note that  $|\{\mathbf{i}\}|$  may be smaller than  $a$  under this case.

We next list four technical lemmas which shall be used in the proofs later.

LEMMA B.0.1. [12, Eq. (3.5)] *Under the mixing assumption in Condition 2.2, suppose  $Z_1$  and  $Z_2$  are  $\mathcal{Z}_1^t$ -measurable and  $\mathcal{Z}_{t+m}^\infty$ -measurable random variables respectively. When  $E(|Z_1|^{2+\epsilon}) < \infty$  and  $E(|Z_2|^{2+\epsilon}) < \infty$ , for some constants  $C$  and  $\epsilon > 0$ ,*

$$|\text{cov}(Z_1, Z_2)| \leq C \{\alpha(m)\}^{\frac{2}{2+\epsilon}} \{E(|Z_1|^{2+\epsilon})\}^{\frac{1}{2+\epsilon}} \{E(|Z_2|^{2+\epsilon})\}^{\frac{1}{2+\epsilon}}.$$

The lemma above can also be obtained from Lemma 2.4 in [20] by taking  $p = q = 2 + \epsilon$ .

LEMMA B.0.2. [9, Lemma 3.4.3] When  $|a_i| \leq A$  and  $|b_i| \leq A$ , then

$$\left| \prod_{i=1}^q a_i - \prod_{i=1}^q b_i \right| \leq \sum_{i=1}^q |a_i - b_i| A^{q-1}.$$

LEMMA B.0.3. [5, Eq. (24)] for two series of numbers  $A_j$  and  $B_j$  for  $j = 1, \dots, p$ .

$$\left| \max_{1 \leq j \leq p} A_j^2 - \max_{1 \leq j \leq p} B_j^2 \right| \leq 2 \max_{1 \leq j \leq p} |B_j| \max_{1 \leq j \leq p} |A_j - B_j| + \max_{1 \leq j \leq p} |A_j - B_j|^2.$$

LEMMA B.0.4. When  $u, v \geq 0$  and  $0 < \vartheta \leq 1$ ,  $(u + v)^\vartheta \leq u^\vartheta + v^\vartheta$ .

PROOF. When  $u \geq 0$  and  $0 < \vartheta \leq 1$ ,  $f(u) = u^\vartheta$  is concave function with  $f(0) = 0$ . By the subadditivity property of concave function, we have  $f(u + v) \leq f(u) + f(v)$ .  $\square$

**B.1. Lemmas for the proof of Theorem 2.1.** In this section, we prove the lemmas for the proof of Theorem 2.1 in Section A.2. We still assume without loss of generality that  $\mathbf{E}(\mathbf{x}) = \mathbf{0}$  as in Section A.2.

B.1.1. *Proof of Lemma A.2.1 (on Page 3, Section A.2).* To illustrate the main idea of the proof of Lemma A.2.1, we first consider a setting where  $x_{i,j}$ 's are all independent, and under this independence case we prove Lemma A.2.1 in Section B.1.1.1. Next in Section B.1.1.2, we prove Lemma A.2.1 under the dependence case with Condition 2.2. Last in Section B.1.1.3, we present the proof under Condition 2.2\*

B.1.1.1. *Proof illustration.* In this section, we present the proof of Lemma A.2.1 by only replacing Condition 2.2 with the assumption that  $x_{i,j}$ 's are independent. Recall  $\tilde{\mathcal{U}}(a)$  defined in (2.5) and  $\tilde{\mathcal{U}}^*(a) = \mathcal{U}(a) - \tilde{\mathcal{U}}(a)$ . Then  $\text{var}\{\mathcal{U}(a)\} \leq \text{var}\{\tilde{\mathcal{U}}(a)\} + 2\sqrt{\text{var}\{\tilde{\mathcal{U}}(a)\}\text{var}\{\tilde{\mathcal{U}}^*(a)\}} + \text{var}\{\tilde{\mathcal{U}}^*(a)\}$ . To prove Lemma A.2.1, we derive  $\text{var}\{\tilde{\mathcal{U}}(a)\}$  and show  $\text{var}\{\tilde{\mathcal{U}}^*(a)\} = o(1)\text{var}\{\tilde{\mathcal{U}}(a)\}$ .

We derive  $\text{var}\{\tilde{\mathcal{U}}(a)\}$  first. Under  $H_0$ ,  $\mathbf{E}(x_{i,j_1}x_{i,j_2}) = 0$  when  $j_1 \neq j_2$ . It follows that  $\mathbf{E}\{\tilde{\mathcal{U}}(a)\} = 0$  and  $\text{var}\{\tilde{\mathcal{U}}(a)\} = \mathbf{E}\{[\mathcal{U}(a)]^2\}$ , and then

$$\text{var}\{\tilde{\mathcal{U}}(a)\} = \frac{1}{(P_a^n)^2} \sum_{\substack{1 \leq j_1 \neq j_2 \leq p \\ 1 \leq j_3 \neq j_4 \leq p}} \sum_{\mathbf{i}, \tilde{\mathbf{i}} \in \mathcal{P}(n, a)} \mathbf{E}\left\{ \prod_{k=1}^a (x_{i_k, j_1} x_{i_k, j_2}) (x_{\tilde{i}_k, j_3} x_{\tilde{i}_k, j_4}) \right\},$$

where following the notation defined at the beginning of Section B,  $\mathbf{i}$  and  $\tilde{\mathbf{i}}$  represent some tuples  $\mathbf{i} = (i_1, \dots, i_a)$  satisfying  $1 \leq i_1 \neq \dots \neq i_a \leq n$ ; and

$\tilde{\mathbf{i}} = (i_1, \dots, i_a)$  satisfying  $1 \leq i_1 \neq \dots \neq i_a \leq n$ . When the corresponding two sets  $\{\mathbf{i}\} \neq \{\tilde{\mathbf{i}}\}$ , for example, when index  $i_1 \in \{\mathbf{i}\}$  but  $i_1 \notin \{\tilde{\mathbf{i}}\}$ ,

$$(B.1.1) \quad \begin{aligned} & \mathbb{E} \left\{ \prod_{k=1}^a (x_{i_k, j_1} x_{i_k, j_2}) (x_{\tilde{i}_k, j_3} x_{\tilde{i}_k, j_4}) \right\} \\ &= \mathbb{E}(x_{i_1, j_1} x_{i_1, j_2}) \times \mathbb{E}(\text{all the remaining terms}) = 0. \end{aligned}$$

Therefore, (B.1.1)  $\neq 0$  only when  $\{\mathbf{i}\} = \{\tilde{\mathbf{i}}\}$ , i.e.,  $\{i_1, \dots, i_a\} = \{\tilde{i}_1, \dots, \tilde{i}_a\}$ . In particular, when  $\{\mathbf{i}\} = \{\tilde{\mathbf{i}}\}$ ,

$$\mathbb{E} \left\{ \prod_{k=1}^a (x_{i_k, j_1} x_{i_k, j_2}) (x_{\tilde{i}_k, j_3} x_{\tilde{i}_k, j_4}) \right\} = \{\mathbb{E}(x_{1, j_1} x_{1, j_2} x_{1, j_3} x_{1, j_4})\}^a.$$

It follows that

$$\begin{aligned} \text{var}\{\tilde{\mathcal{U}}(a)\} &= \frac{a!}{(P_a^n)^2} \sum_{\mathbf{i} \in \mathcal{P}(n, a)} \sum_{\substack{1 \leq j_1 \neq j_2 \leq p \\ 1 \leq j_3 \neq j_4 \leq p}} \{\mathbb{E}(x_{1, j_1} x_{1, j_2} x_{1, j_3} x_{1, j_4})\}^a \\ &= \frac{a!}{P_a^n} \sum_{1 \leq j_1 \neq j_2 \leq p; 1 \leq j_3 \neq j_4 \leq p} \{\mathbb{E}(x_{1, j_1} x_{1, j_2} x_{1, j_3} x_{1, j_4})\}^a. \end{aligned}$$

When  $x_{i,j}$ 's are independent, as  $j_1 \neq j_2$  and  $j_3 \neq j_4$ ,  $\mathbb{E}(x_{1, j_1} x_{1, j_2} x_{1, j_3} x_{1, j_4}) \neq 0$  only when  $\{j_1, j_2\} = \{j_3, j_4\}$ , which gives  $\mathbb{E}(x_{1, j_1} x_{1, j_2} x_{1, j_3} x_{1, j_4}) = \mathbb{E}(x_{1, j_1}^2) \times \mathbb{E}(x_{1, j_2}^2)$ . Therefore,  $\text{var}\{\tilde{\mathcal{U}}(a)\} = 2a!(P_a^n)^{-1} \sum_{1 \leq j_1 \neq j_2 \leq p} \mathbb{E}(x_{1, j_1}^2) \mathbb{E}(x_{1, j_2}^2)$ . By Condition 2.1, we have  $\text{var}\{\tilde{\mathcal{U}}(a)\} = \Theta(p^2 n^{-a})$ .

We next show  $\text{var}\{\tilde{\mathcal{U}}^*(a)\} = o(1) \text{var}\{\tilde{\mathcal{U}}(a)\}$ . As  $\mathbb{E}\{\tilde{\mathcal{U}}^*(a)\} = 0$ ,  $\text{var}\{\tilde{\mathcal{U}}^*(a)\} = \mathbb{E}\{\{\tilde{\mathcal{U}}^*(a)\}^2\}$ . Recall the definition of  $\mathcal{U}^*(a)$ , then we have

$$\text{var}\{\tilde{\mathcal{U}}^*(a)\} = \sum_{\substack{1 \leq j_1 \neq j_2 \leq p \\ 1 \leq j_3 \neq j_4 \leq p}} \sum_{1 \leq c_1, c_2 \leq a} \sum_{\substack{\mathbf{i} \in \mathcal{P}(n, a+c_1) \\ \tilde{\mathbf{i}} \in \mathcal{P}(n, a+c_2)}} \frac{(-1)^{c_1+c_2} \binom{a}{c_1} \binom{a}{c_2}}{P_{a+c_1}^n P_{a+c_2}^n} Q(\mathbf{i}, j_1, j_2, \tilde{\mathbf{i}}, j_3, j_4),$$

where we correspondingly define

$$\begin{aligned} Q(\mathbf{i}, j_1, j_2, \tilde{\mathbf{i}}, j_3, j_4) &= \mathbb{E} \left[ \prod_{k=1}^{a-c_1} x_{i_k, j_1} x_{i_k, j_2} \prod_{k=a-c_1+1}^a x_{i_k, j_1} \prod_{k=a+1}^{a+c_1} x_{i_k, j_2} \right. \\ &\quad \left. \times \prod_{\tilde{k}=1}^{a-c_2} x_{\tilde{i}_{\tilde{k}}, j_3} x_{\tilde{i}_{\tilde{k}}, j_4} \prod_{\tilde{k}=a-c_2+1}^a x_{\tilde{i}_{\tilde{k}}, j_3} \prod_{\tilde{k}=a+1}^{a+c_2} x_{\tilde{i}_{\tilde{k}}, j_4} \right]. \end{aligned}$$

To evaluate  $\text{var}\{\tilde{\mathcal{U}}^*(a)\}$ , we examine the value of  $Q(\mathbf{i}, j_1, j_2, \tilde{\mathbf{i}}, j_3, j_4)$ . We first note that if  $Q(\mathbf{i}, j_1, j_2, \tilde{\mathbf{i}}, j_3, j_4) \neq 0$ , the following two claims hold:

*Claim 1:*  $\{j_1, j_2\} = \{j_3, j_4\}$ ; *Claim 2:*  $\{\mathbf{i}\} = \{\tilde{\mathbf{i}}\}$  and  $c_1 = c_2$ .

To prove *Claim 1*, we show that if  $\{j_1, j_2\} \neq \{j_3, j_4\}$ ,  $Q(\mathbf{i}, j_1, j_2, \tilde{\mathbf{i}}, j_3, j_4) = 0$ . We consider  $j_1 \notin \{j_3, j_4\}$  as an example. When  $j_1 \notin \{j_3, j_4\}$ , as  $j_1 \neq j_2$ , we further know  $j_1 \notin \{j_2, j_3, j_4\}$  and we can write

$$Q(\mathbf{i}, j_1, j_2, \tilde{\mathbf{i}}, j_3, j_4) = \mathbb{E}\left(\prod_{k=1}^a x_{i_k, j_1}\right) \times \mathbb{E}(\text{other terms with subscripts } j_2, j_3, j_4) = 0,$$

where we use  $\mathbb{E}(\prod_{k=1}^a x_{i_k, j_1}) = \{\mathbb{E}(x_{1, j_1})\}^a = 0$  as  $\mathbb{E}(x_{1, j_1}) = 0$ . In addition, to prove *Claim 2*, we show that if  $\{\mathbf{i}\} \neq \{\tilde{\mathbf{i}}\}$ ,  $Q(\mathbf{i}, j_1, j_2, \tilde{\mathbf{i}}, j_3, j_4) = 0$ . If  $\{\mathbf{i}\} \neq \{\tilde{\mathbf{i}}\}$ , similarly to (B.1.1), suppose an index  $i \in \{\mathbf{i}\}$  but  $i \notin \{\tilde{\mathbf{i}}\}$ . Then we can write  $Q(\mathbf{i}, j_1, j_2, \tilde{\mathbf{i}}, j_1, j_2) = \mathbb{E}(x_{i, j_1}) \times \mathbb{E}(\text{other terms}) = 0$  or  $Q(\mathbf{i}, j_1, j_2, \tilde{\mathbf{i}}, j_1, j_2) = \mathbb{E}(x_{i, j_1} x_{i, j_2}) \times \mathbb{E}(\text{other terms}) = 0$ . As  $\{\mathbf{i}\}$  and  $\{\tilde{\mathbf{i}}\}$  are of sizes  $a + c_1$  and  $a + c_2$  respectively,  $\{\mathbf{i}\} = \{\tilde{\mathbf{i}}\}$  induces  $c_1 = c_2$ .

Given *Claim 1* and *Claim 2*, we write  $c_1 = c_2 = c$  and decompose  $\{\mathbf{i}\}$  and  $\{\tilde{\mathbf{i}}\}$  into three disjoint subsets respectively as follows:

$$\begin{aligned} \{\mathbf{i}\}_{(1)} &= \{i_1, \dots, i_{a-c}\}, \quad \{\mathbf{i}\}_{(2)} = \{i_{a-c+1}, \dots, i_a\}, \quad \{\mathbf{i}\}_{(3)} = \{i_{a+1}, \dots, i_{a+c}\}, \\ \{\tilde{\mathbf{i}}\}_{(1)} &= \{\tilde{i}_1, \dots, \tilde{i}_{a-c}\}, \quad \{\tilde{\mathbf{i}}\}_{(2)} = \{\tilde{i}_{a-c+1}, \dots, \tilde{i}_a\}, \quad \{\tilde{\mathbf{i}}\}_{(3)} = \{\tilde{i}_{a+1}, \dots, \tilde{i}_{a+c}\}, \end{aligned}$$

which satisfies that  $\{\mathbf{i}\} = \cup_{l=1}^3 \{\mathbf{i}\}_{(l)}$  and  $\{\tilde{\mathbf{i}}\} = \cup_{l=1}^3 \{\tilde{\mathbf{i}}\}_{(l)}$ . We next prove the following *Claim 3*: if  $Q(\mathbf{i}, j_1, j_2, \tilde{\mathbf{i}}, j_3, j_4) \neq 0$ , one of the following two cases hold:

1.  $j_1 = j_3, j_2 = j_4, \{\mathbf{i}\}_{(1)} = \{\tilde{\mathbf{i}}\}_{(1)}, \{\mathbf{i}\}_{(2)} = \{\tilde{\mathbf{i}}\}_{(2)}, \{\mathbf{i}\}_{(3)} = \{\tilde{\mathbf{i}}\}_{(3)}$ ;
2.  $j_1 = j_4, j_2 = j_3, \{\mathbf{i}\}_{(1)} = \{\tilde{\mathbf{i}}\}_{(1)}, \{\mathbf{i}\}_{(2)} = \{\tilde{\mathbf{i}}\}_{(3)}, \{\mathbf{i}\}_{(3)} = \{\tilde{\mathbf{i}}\}_{(2)}$ .

To prove *Claim 3*, we note that *Claim 1* suggests that if  $Q(\mathbf{i}, j_1, j_2, \tilde{\mathbf{i}}, j_3, j_4) \neq 0$ , either  $\{j_1 = j_3, j_2 = j_4\}$  or  $\{j_1 = j_4, j_2 = j_3\}$  holds. We consider  $j_1 = j_3$  and  $j_2 = j_4$  as an example. Suppose that there exists an index  $i \in \{\mathbf{i}\}_{(2)}$ . Since  $x_{i, j}$ 's are independent with mean 0, if  $i \in \{\tilde{\mathbf{i}}\}_{(1)}$ ,  $Q(\mathbf{i}, j_1, j_2, \tilde{\mathbf{i}}, j_1, j_2) = \mathbb{E}(x_{i, j_1}^2 x_{i, j_2}) \times \mathbb{E}(\text{other terms}) = 0$ ; or if  $i \in \{\tilde{\mathbf{i}}\}_{(3)}$ ,  $Q(\mathbf{i}, j_1, j_2, \tilde{\mathbf{i}}, j_1, j_2) = \mathbb{E}(x_{i, j_1} x_{i, j_2}) \times \mathbb{E}(\text{other terms}) = 0$ . Symmetrically, if  $Q(\mathbf{i}, j_1, j_2, \tilde{\mathbf{i}}, j_1, j_2) \neq 0$ , we know  $\{\mathbf{i}\}_{(l)} = \{\tilde{\mathbf{i}}\}_{(l)}$  for  $l = 1, 2, 3$  under this case. The similar analysis also applies to the second case in *Claim 3*. Moreover, under the two cases in *Claim 3*, we have  $Q(\mathbf{i}, j_1, j_2, \tilde{\mathbf{i}}, j_3, j_4) = \{\mathbb{E}(x_{1, j_1}^2 x_{1, j_2}^2)\}^{a-c} \{\mathbb{E}(x_{1, j_1}^2)\}^c \{\mathbb{E}(x_{1, j_2}^2)\}^c$ .

In summary,

$$\begin{aligned} \text{var}\{\tilde{\mathcal{U}}^*(a)\} &= \sum_{1 \leq j_1 \neq j_2 \leq p} \sum_{c=1}^a \sum_{\mathbf{i} \in \mathcal{P}(n, a+c)} \frac{2(a-c)!c!}{(P_{a+c}^n)^2} \{\mathbf{E}(x_{1,j_1}^2)\mathbf{E}(x_{1,j_2}^2)\}^a \\ &\leq C \sum_{1 \leq j_1 \neq j_2 \leq p} \sum_{c=1}^a n^{-(a+c)} \{\mathbf{E}(x_{1,j_1}^2)\mathbf{E}(x_{1,j_2}^2)\}^a, \end{aligned}$$

which is of order  $O(p^2 n^{-(a+1)})$ . Since we have obtained that  $\text{var}\{\tilde{\mathcal{U}}(a)\} = \Theta(p^2 n^{-a})$ , then  $\text{var}\{\tilde{\mathcal{U}}^*(a)\} = o(1)\text{var}\{\tilde{\mathcal{U}}(a)\}$  is proved.

*B.1.1.2. Proof under Condition 2.2.* Section B.1.1.1 considers the case where  $x_{i,j}$ 's are independent. In this section, we further prove Lemma A.2.1 under Condition 2.2. We first explain the proof idea intuitively. Under Condition 2.2,  $x_{i,j}$ 's may be no longer independent, but the dependence between  $x_{i,j_1}$  and  $x_{i,j_2}$  degenerates exponentially with their distance  $|j_1 - j_2|$ . We expect that when  $|j_1 - j_2|$  is large enough,  $x_{i,j_1}$  and  $x_{i,j_2}$  are ‘‘asymptotically independent’’. Specifically, we will introduce a threshold  $K_0$  to be defined in (B.1.9) below. Then we will show that the majority of  $(x_{i,j_1}, x_{i,j_2})$  pairs satisfy  $|j_1 - j_2| > K_0$ , and when  $|j_1 - j_2| > K_0$ ,  $x_{i,j_1}$  and  $x_{i,j_2}$  are weakly dependent with similar properties to those under the independence case.

We next present the detailed proof under Condition 2.2. Under  $H_0$ , similarly to Section B.1.1.1, we have  $\mathbf{E}\{\mathcal{U}(a)\} = 0$  and  $\text{var}\{\mathcal{U}(a)\} = \mathbf{E}\{\mathcal{U}^2(a)\}$ . Then

$$(B.1.2) \quad \mathbf{E}\{\mathcal{U}^2(a)\} = \sum_{\substack{1 \leq j_1 \neq j_2 \leq p; \\ 1 \leq j_3 \neq j_4 \leq p}} \sum_{\substack{0 \leq c_1, c_2 \leq a; \\ \mathbf{i} \in \mathcal{P}(n, a+c_1); \\ \tilde{\mathbf{i}} \in \mathcal{P}(n, a+c_2)}} F(c_1, c_2, a) \times Q(\mathbf{i}, j_1, j_2, \tilde{\mathbf{i}}, j_3, j_4),$$

where we define  $F(c_1, c_2, a) = (-1)^{c_1+c_2} \binom{a}{c_1} \binom{a}{c_2} (P_{a+c_1}^n P_{a+c_2}^n)^{-1}$ , and recall

$$(B.1.3) \quad \begin{aligned} &Q(\mathbf{i}, j_1, j_2, \tilde{\mathbf{i}}, j_3, j_4) \\ &= \mathbf{E} \left\{ \prod_{k=1}^{a-c_1} x_{i_k, j_1} x_{i_k, j_2} \prod_{k=a-c_1+1}^a x_{i_k, j_1} \prod_{k=a+1}^{a+c_1} x_{i_k, j_2} \right. \\ &\quad \left. \times \prod_{\tilde{k}=1}^{a-c_2} x_{\tilde{i}_{\tilde{k}}, j_3} x_{\tilde{i}_{\tilde{k}}, j_4} \prod_{\tilde{k}=a-c_2+1}^a x_{\tilde{i}_{\tilde{k}}, j_3} \prod_{\tilde{k}=a+1}^{a+c_2} x_{\tilde{i}_{\tilde{k}}, j_4} \right\}. \end{aligned}$$

Similarly to Section B.1.1.1, to evaluate  $\text{var}\{\mathcal{U}(a)\}$ , we next examine the value of  $Q(\mathbf{i}, j_1, j_2, \tilde{\mathbf{i}}, j_3, j_4)$  under different cases.

When  $\{\mathbf{i}\} \neq \{\tilde{\mathbf{i}}\}$ , we show (B.1.3) = 0, that is, *Claim 2* in Section B.1.1.1 also holds here. To see this, we assume without loss of generality that an index  $i \in \{\mathbf{i}\}$  and  $i \notin \{\tilde{\mathbf{i}}\}$ . Then (B.1.3) takes one of the two following forms:

$$\begin{aligned} \text{(B.1.3)} &= \mathbb{E}(x_{i,j_1}) \times \mathbb{E}(\text{all the remaining terms}) \quad (j_1 = 1, \dots, p), \\ \text{(B.1.3)} &= \mathbb{E}(x_{i,j_1} x_{i,j_2}) \times \mathbb{E}(\text{all the remaining terms}) \quad (1 \leq j_1 \neq j_2 \leq p). \end{aligned}$$

Since  $\mathbb{E}(x_{i,j_1}) = 0$  and  $\mathbb{E}(x_{i,j_1} x_{i,j_2}) = 0$  under  $H_0$ , we know (B.1.3) = 0 when  $\{\mathbf{i}\} \neq \{\tilde{\mathbf{i}}\}$ . It follows that

$$\text{(B.1.4)} \quad \sum_{\substack{1 \leq j_1 \neq j_2 \leq p; \\ 1 \leq j_3 \neq j_4 \leq p}} \sum_{\substack{0 \leq c_1, c_2 \leq a; \\ \mathbf{i} \in \mathcal{P}(n, a + c_1); \\ \tilde{\mathbf{i}} \in \mathcal{P}(n, a + c_2)}} F(c_1, c_2, a) Q(\mathbf{i}, j_1, j_2, \tilde{\mathbf{i}}, j_3, j_4) \mathbf{1}_{\{\{\mathbf{i}\} \neq \{\tilde{\mathbf{i}}\}\}} = 0,$$

where  $\mathbf{1}_{\{\cdot\}}$  represents an indicator function.

When  $\{\mathbf{i}\} = \{\tilde{\mathbf{i}}\}$ , we know  $c_1 = c_2$  and we write  $c_1 = c_2 = c$ . If  $c = 0$ ,

$$Q(\mathbf{i}, j_1, j_2, \tilde{\mathbf{i}}, j_3, j_4) \mathbf{1}_{\{\{\mathbf{i}\} = \{\tilde{\mathbf{i}}\}, c=0\}} = \{\mathbb{E}(x_{i,j_1} x_{i,j_2} x_{i,j_3} x_{i,j_4})\}^a.$$

Then we have

$$\begin{aligned} \text{(B.1.5)} \quad & \sum_{\substack{1 \leq j_1 \neq j_2 \leq p; \\ 1 \leq j_3 \neq j_4 \leq p}} \sum_{\substack{0 \leq c \leq a; \\ \mathbf{i}, \tilde{\mathbf{i}} \in \mathcal{P}(n, a + c)}} F(c, c, a) Q(\mathbf{i}, j_1, j_2, \tilde{\mathbf{i}}, j_3, j_4) \mathbf{1}_{\{\{\mathbf{i}\} = \{\tilde{\mathbf{i}}\}, c=0\}} \\ &= \frac{1}{(P_a^n)^2} \sum_{\mathbf{i} \in \mathcal{P}(n, a)} a! \sum_{\substack{1 \leq j_1 \neq j_2 \leq p; \\ 1 \leq j_3 \neq j_4 \leq p}} \{\mathbb{E}(x_{i,j_1} x_{i,j_2} x_{i,j_3} x_{i,j_4})\}^a \\ &= a! (P_a^n)^{-1} \sum_{\substack{1 \leq j_1 \neq j_2 \leq p; \\ 1 \leq j_3 \neq j_4 \leq p}} \{\mathbb{E}(x_{i,j_1} x_{i,j_2} x_{i,j_3} x_{i,j_4})\}^a. \end{aligned}$$

If  $c \geq 1$ , for given  $\mathbf{i}, \tilde{\mathbf{i}} \in \mathcal{P}(n, a + c)$ , we decompose the sets  $\{\mathbf{i}\}$  and  $\{\tilde{\mathbf{i}}\}$  into three disjoint sets respectively, defined as:

$$\begin{aligned} \{\mathbf{i}\}_{(1)} &= \{i_1, \dots, i_{a-c}\}, \quad \{\mathbf{i}\}_{(2)} = \{i_{a-c+1}, \dots, i_a\}, \quad \{\mathbf{i}\}_{(3)} = \{i_{a+1}, \dots, i_{a+c}\}, \\ \{\tilde{\mathbf{i}}\}_{(1)} &= \{\tilde{i}_1, \dots, \tilde{i}_{a-c}\}, \quad \{\tilde{\mathbf{i}}\}_{(2)} = \{\tilde{i}_{a-c+1}, \dots, \tilde{i}_a\}, \quad \{\tilde{\mathbf{i}}\}_{(3)} = \{\tilde{i}_{a+1}, \dots, \tilde{i}_{a+c}\}, \end{aligned}$$

which satisfy that  $\{\mathbf{i}\} = \cup_{l=1}^3 \{\mathbf{i}\}_{(l)}$  and  $\{\tilde{\mathbf{i}}\} = \cup_{l=1}^3 \{\tilde{\mathbf{i}}\}_{(l)}$ . The definitions are similarly used in Section B.1.1.1. We next examine the value of (B.1.3) by further discussing different cases.



*Case 1.* We consider the cases where  $\{\mathbf{i}\} = \{\tilde{\mathbf{i}}\}$ ,  $1 \leq c \leq a-1$  and  $\{\mathbf{i}\}_{(1)} = \{\tilde{\mathbf{i}}\}_{(1)}$ . Then we have  $\{\mathbf{i}\}_{(2)} \cup \{\mathbf{i}\}_{(3)} = \{\tilde{\mathbf{i}}\}_{(2)} \cup \{\tilde{\mathbf{i}}\}_{(3)}$ . Note that here  $\{\mathbf{i}\}_{(1)} = \{\tilde{\mathbf{i}}\}_{(1)}$  is assumed, and  $\{\mathbf{i}\}_{(2)}$ ,  $\{\mathbf{i}\}_{(3)}$ ,  $\{\tilde{\mathbf{i}}\}_{(2)}$  and  $\{\tilde{\mathbf{i}}\}_{(3)}$  are all nonempty as  $c \geq 1$ . Similarly to *Claim 3* in Section B.1.1.1, we next prove that if (B.1.3)  $\neq 0$ , one of the following two cases holds:

$$(B.1.6) \quad \begin{aligned} \{\mathbf{i}\}_{(3)} &= \{\tilde{\mathbf{i}}\}_{(3)}, \{\mathbf{i}\}_{(2)} = \{\tilde{\mathbf{i}}\}_{(2)}, j_1 = j_3, j_2 = j_4; \\ \{\mathbf{i}\}_{(3)} &= \{\tilde{\mathbf{i}}\}_{(2)}, \{\mathbf{i}\}_{(2)} = \{\tilde{\mathbf{i}}\}_{(3)}, j_1 = j_4, j_2 = j_3. \end{aligned}$$

We prove (B.1.6) by contradiction.

If  $\{\mathbf{i}\}_{(2)} \cap \{\tilde{\mathbf{i}}\}_{(2)} \neq \emptyset$  and  $\{\mathbf{i}\}_{(2)} \cap \{\tilde{\mathbf{i}}\}_{(3)} \neq \emptyset$ , it means that  $\{\mathbf{i}\}_{(2)}$  intersects with both  $\{\tilde{\mathbf{i}}\}_{(2)}$  and  $\{\tilde{\mathbf{i}}\}_{(3)}$ . Suppose  $i_1 \in \{\mathbf{i}\}_{(2)} \cap \{\tilde{\mathbf{i}}\}_{(2)}$  and  $i_2 \in \{\mathbf{i}\}_{(2)} \cap \{\tilde{\mathbf{i}}\}_{(3)}$ . It follows that

$$(B.1.3) = E(x_{i_1, j_1} x_{i_1, j_3}) \times E(x_{i_2, j_1} x_{i_2, j_4}) \times E(\text{all the remaining terms}).$$

As  $j_3 \neq j_4$ ,  $E(x_{i_1, j_1} x_{i_1, j_3}) \times E(x_{i_2, j_1} x_{i_2, j_4}) = 0$  under  $H_0$ . Therefore (B.1.3) = 0. Similarly if  $\{\mathbf{i}\}_{(3)} \cap \{\tilde{\mathbf{i}}\}_{(2)} \neq \emptyset$  and  $\{\mathbf{i}\}_{(3)} \cap \{\tilde{\mathbf{i}}\}_{(3)} \neq \emptyset$ , we know (B.1.3) = 0. The analysis shows that when (B.1.3)  $\neq 0$ ,  $\{\mathbf{i}\}_{(2)}$  only intersects with one of  $\{\tilde{\mathbf{i}}\}_{(2)}$  and  $\{\tilde{\mathbf{i}}\}_{(3)}$ . Symmetrically,  $\{\mathbf{i}\}_{(3)}$  only intersects with another one of  $\{\tilde{\mathbf{i}}\}_{(2)}$  and  $\{\tilde{\mathbf{i}}\}_{(3)}$ . Since  $|\{\mathbf{i}\}_{(2)}| = |\{\mathbf{i}\}_{(3)}| = |\{\tilde{\mathbf{i}}\}_{(2)}| = |\{\tilde{\mathbf{i}}\}_{(3)}|$ , it remains to consider two cases  $\{\{\mathbf{i}\}_{(2)} = \{\tilde{\mathbf{i}}\}_{(2)} \text{ and } \{\mathbf{i}\}_{(3)} = \{\tilde{\mathbf{i}}\}_{(3)}\}$  or  $\{\{\mathbf{i}\}_{(2)} = \{\tilde{\mathbf{i}}\}_{(3)} \text{ and } \{\mathbf{i}\}_{(3)} = \{\tilde{\mathbf{i}}\}_{(2)}\}$ . To obtain (B.1.6), we next examine the two cases respectively.

If  $\{\mathbf{i}\}_{(2)} = \{\tilde{\mathbf{i}}\}_{(2)}$  and  $\{\mathbf{i}\}_{(3)} = \{\tilde{\mathbf{i}}\}_{(3)}$ , suppose  $i_1 \in \{\mathbf{i}\}_{(2)}$  and  $i_2 \in \{\mathbf{i}\}_{(3)}$ . Then as  $\{\mathbf{i}\}_{(2)} \cap \{\mathbf{i}\}_{(3)} = \emptyset$ ,

$$(B.1.3) = E(x_{i_1, j_1} x_{i_1, j_3}) \times E(x_{i_2, j_2} x_{i_2, j_4}) \times E(\text{all the remaining terms}),$$

which is nonzero only when  $j_1 = j_3$  and  $j_2 = j_4$ . Similarly, if  $\{\mathbf{i}\}_{(2)} = \{\tilde{\mathbf{i}}\}_{(3)}$  and  $\{\mathbf{i}\}_{(3)} = \{\tilde{\mathbf{i}}\}_{(2)}$ , (B.1.3)  $\neq 0$  only when  $j_1 = j_4$  and  $j_2 = j_3$ . In summary, if (B.1.3)  $\neq 0$ , (B.1.6) is obtained, and

$$\begin{aligned} & Q(\mathbf{i}, j_1, j_2, \tilde{\mathbf{i}}, j_3, j_4) \times \mathbf{1}_{\{\{\mathbf{i}\} = \{\tilde{\mathbf{i}}\}, \{\mathbf{i}\}_{(1)} = \{\tilde{\mathbf{i}}\}_{(1)}, 1 \leq c \leq a-1\}} \\ &= Q(\mathbf{i}, j_1, j_2, \tilde{\mathbf{i}}, j_3, j_4) \mathbf{1}_{\{\{\mathbf{i}}_{(1)} = \{\tilde{\mathbf{i}}\}_{(1)}, 1 \leq c \leq a-1\}} \\ & \quad \times \left( \mathbf{1}_{\left\{ \begin{array}{l} \{\mathbf{i}\}_{(2)} = \{\tilde{\mathbf{i}}\}_{(2)}, j_1 = j_3, \\ \{\mathbf{i}\}_{(3)} = \{\tilde{\mathbf{i}}\}_{(3)}, j_2 = j_4 \end{array} \right\}} + \mathbf{1}_{\left\{ \begin{array}{l} \{\mathbf{i}\}_{(2)} = \{\tilde{\mathbf{i}}\}_{(3)}, j_1 = j_4, \\ \{\mathbf{i}\}_{(3)} = \{\tilde{\mathbf{i}}\}_{(2)}, j_2 = j_3 \end{array} \right\}} \right). \end{aligned}$$

In addition, under the two cases in (B.1.6), we have  $Q(\mathbf{i}, j_1, j_2, \tilde{\mathbf{i}}, j_3, j_4) = \{E(x_{i,j_1}^2 x_{i,j_2}^2)\}^{a-c} \{E(x_{i,j_1}^2)E(x_{i,j_2}^2)\}^c$ . Therefore,

$$\begin{aligned}
\text{(B.1.7)} \quad & \sum_{\substack{1 \leq j_1 \neq j_2 \leq p; \\ 1 \leq j_3 \neq j_4 \leq p}} \sum_{\substack{0 \leq c \leq a; \\ \mathbf{i}, \tilde{\mathbf{i}} \in \mathcal{P}(n, a+c)}} F(c, c, a) Q(\mathbf{i}, j_1, j_2, \tilde{\mathbf{i}}, j_3, j_4) \mathbf{1}_{\left\{ \begin{array}{l} \{\mathbf{i}\} = \{\tilde{\mathbf{i}}\}, \\ \{\mathbf{i}\}_{(1)} = \{\tilde{\mathbf{i}}\}_{(1)}, \\ 1 \leq c \leq a-1 \end{array} \right\}} \\
&= \sum_{\substack{1 \leq c \leq a-1; \\ \mathbf{i} \in \mathcal{P}(n, a+c); \\ 1 \leq j_1 \neq j_2 \leq p}} \frac{\binom{a}{c}^2 2(a-c)! c! c!}{(P_{a+c}^n)^2} \{E(x_{i,j_1}^2 x_{i,j_2}^2)\}^{a-c} \{E(x_{i,j_1}^2)E(x_{i,j_2}^2)\}^c \\
&= \sum_{c=1}^{a-1} O(p^2 n^{-(a+c)}),
\end{aligned}$$

where the last equation uses Condition 2.1.

*Case 2.* We consider the cases when  $\{\mathbf{i}\} = \{\tilde{\mathbf{i}}\}$ ,  $1 \leq c \leq a-1$ ,  $\{\mathbf{i}\}_{(1)} \neq \{\tilde{\mathbf{i}}\}_{(1)}$  and  $\{\mathbf{i}\}_{(1)} \cap \{\tilde{\mathbf{i}}\}_{(1)} \neq \emptyset$ . Suppose that there exists an index  $i_1 \in \{\mathbf{i}\}_{(1)} \cap \{\tilde{\mathbf{i}}\}_{(1)}$ . Since  $\{\mathbf{i}\}_{(1)} \neq \{\tilde{\mathbf{i}}\}_{(1)}$  and  $|\{\mathbf{i}\}_{(1)}| = |\{\tilde{\mathbf{i}}\}_{(1)}|$ , there exists another index  $i_2 \in \{\mathbf{i}\}_{(1)}$  and  $i_2 \notin \{\tilde{\mathbf{i}}\}_{(1)}$ . As  $\{\mathbf{i}\} = \{\tilde{\mathbf{i}}\}$ , we know  $i_2 \in \{\tilde{\mathbf{i}}\}_{(2)} \cup \{\tilde{\mathbf{i}}\}_{(3)}$ . Without loss of generality, we assume  $i_2 \in \{\tilde{\mathbf{i}}\}_{(2)}$ , then

$$\text{(B.1.8)} \quad \text{(B.1.3)} = E(x_{i_1, j_1} x_{i_1, j_2} x_{i_1, j_3} x_{i_1, j_4}) E(x_{i_2, j_1} x_{i_2, j_2} x_{i_2, j_3}) E(\text{other terms}).$$

As  $j_1 \neq j_2$  and  $j_3 \neq j_4$  in summation, it suffices to discuss four sub-cases  $\{j_1 = j_3 \text{ and } j_2 = j_4\}$ ,  $\{j_1 = j_4 \text{ and } j_2 = j_3\}$ ,  $\{j_1 \neq j_3 \text{ and } j_1 \neq j_4\}$  and  $\{j_2 \neq j_3 \text{ and } j_2 \neq j_4\}$  under Case 2.

*Case 2.1* If  $j_1 = j_3$  and  $j_2 = j_4$ , (B.1.8) gives

$$\text{(B.1.3)} = E(x_{i_1, j_1}^2 x_{i_1, j_2}^2) \times E(x_{i_2, j_1}^2 x_{i_2, j_2}^2) \times E(\text{all the remaining terms}).$$

When  $x_{i,j}$ 's are independent as in Section B.1.1.1, we know  $E(x_{i_2, j_1}^2 x_{i_2, j_2}^2) = E(x_{i_2, j_1}^2)E(x_{i_2, j_2}^2) = 0$  and thus (B.1.3) = 0. Alternatively, under Condition 2.2, (B.1.3) may no longer be 0 due to the dependence of  $x_{i,j}$ 's. But as discussed at the beginning of Section B.1.1.2, we expect that  $x_{i, j_1}$  and  $x_{i, j_2}$  are ‘‘asymptotically independent’’ as  $|j_1 - j_2|$  increases, and thus we expect that (B.1.3) is close to 0 when  $|j_1 - j_2|$  is large. To quantitatively evaluate (B.1.3) based on  $|j_1 - j_2|$ , we introduce a threshold  $K_0$  below, and discuss the value of (B.1.3) when  $|j_1 - j_2| > K_0$  and  $|j_1 - j_2| \leq K_0$ , respectively.

Specifically, given  $\delta$  in Condition 2.2 and positive constants  $\mu$  and  $\epsilon$ , we define

$$\text{(B.1.9)} \quad K_0 = -(2 + \epsilon)(4 + \mu)(\log p) / (\epsilon \log \delta).$$

When  $|j_1 - j_2| > K_0$ , by Conditions 2.1 and 2.2, we have

$$\begin{aligned} |\text{(B.1.3)}| &\leq C \times |\mathbf{E}(x_{i_2, j_1}^2 x_{i_2, j_2})| = C \times |\text{cov}(x_{i_2, j_1}^2, x_{i_2, j_2})| \\ &\leq C \delta^{\frac{K_0 \epsilon}{2+\epsilon}} = O(1) p^{-(4+\mu)}, \end{aligned}$$

where  $|\text{cov}(x_{i_2, j_1}^2, x_{i_2, j_2})| \leq C \delta^{\frac{K_0 \epsilon}{2+\epsilon}}$  holds by the  $\alpha$ -mixing inequality in Lemma B.0.1. When  $|j_1 - j_2| \leq K_0$ , by the uniform boundedness of moments from Condition 2.1, we have (B.1.3) =  $O(1)$ . To summarize, we define an event  $S_{nem} = \{\{\mathbf{i}\} = \{\tilde{\mathbf{i}}\}, 1 \leq c \leq a-1, \{\mathbf{i}\}_{(1)} \neq \{\tilde{\mathbf{i}}\}_{(1)}, \{\mathbf{i}\}_{(1)} \cap \{\tilde{\mathbf{i}}\}_{(1)} \neq \emptyset\}$ . Then

$$\begin{aligned} &Q(\mathbf{i}, j_1, j_2, \tilde{\mathbf{i}}, j_3, j_4) \times \mathbf{1}_{\{S_{nem}, j_1=j_3, j_2=j_4\}} \\ &= Q(\mathbf{i}, j_1, j_2, \tilde{\mathbf{i}}, j_3, j_4) \times \left( \mathbf{1}_{\left\{ \begin{smallmatrix} S_{nem}, j_1=j_3, j_2=j_4, \\ |j_1-j_2| > K_0 \end{smallmatrix} \right\}} + \mathbf{1}_{\left\{ \begin{smallmatrix} S_{nem}, j_1=j_3, j_2=j_4, \\ |j_1-j_2| \leq K_0 \end{smallmatrix} \right\}} \right). \end{aligned}$$

The analysis above gives  $Q(\mathbf{i}, j_1, j_2, \tilde{\mathbf{i}}, j_3, j_4) \mathbf{1}_{\{S_{nem}, j_1=j_3, j_2=j_4, |j_1-j_2| > K_0\}} = O(1) p^{-(4+\mu)}$  and  $Q(\mathbf{i}, j_1, j_2, \tilde{\mathbf{i}}, j_3, j_4) \mathbf{1}_{\{S_{nem}, j_1=j_3, j_2=j_4, |j_1-j_2| \leq K_0\}} = O(1)$ , respectively. Moreover, the total number of  $(j_1, j_2)$  pairs satisfying  $|j_1 - j_2| \leq K_0$  and  $|j_1 - j_2| > K_0$  are  $O(p^2)$  and  $O(pK_0)$ , respectively. Therefore,

$$\begin{aligned} \text{(B.1.10)} &\left| \sum_{\substack{1 \leq j_1 \neq j_2 \leq p; \\ 1 \leq j_3 \neq j_4 \leq p}} \sum_{\substack{0 \leq c \leq a; \\ \mathbf{i}, \tilde{\mathbf{i}} \in \mathcal{P}(n, a+c)}} F(c, c, a) Q(\mathbf{i}, j_1, j_2, \tilde{\mathbf{i}}, j_3, j_4) \mathbf{1}_{\{S_{nem}, j_1=j_3, j_2=j_4\}} \right| \\ &\leq \sum_{\substack{1 \leq j_1 \neq j_2 \leq p; \\ 1 \leq j_3 \neq j_4 \leq p}} \sum_{\substack{0 \leq c \leq a; \\ \mathbf{i}, \tilde{\mathbf{i}} \in \mathcal{P}(n, a+c)}} \left| F(c, c, a) \right| \times \mathbf{1}_{\{S_{nem}, j_1=j_3, j_2=j_4\}} \\ &\quad \times \left\{ O(p^{-(4+\mu)}) \mathbf{1}_{\{|j_1-j_2| > K_0\}} + C \times \mathbf{1}_{\{|j_1-j_2| \leq K_0\}} \right\} \\ &= \sum_{c=1}^{a-1} n^{-(a+c)} \left\{ O(1) p^2 p^{-(4+\mu)} + O(1) p K_0 \right\} = o(p^2 n^{-a}). \end{aligned}$$

*Case 2.2* If  $j_1 = j_4$  and  $j_2 = j_3$ , similarly to *Case 2.1*, we have

$$\begin{aligned} \text{(B.1.11)} &\left| \sum_{\substack{1 \leq j_1 \neq j_2 \leq p; \\ 1 \leq j_3 \neq j_4 \leq p}} \sum_{\substack{0 \leq c \leq a; \\ \mathbf{i}, \tilde{\mathbf{i}} \in \mathcal{P}(n, a+c)}} F(c, c, a) Q(\mathbf{i}, j_1, j_2, \tilde{\mathbf{i}}, j_3, j_4) \mathbf{1}_{\{S_{nem}, j_1=j_4, j_2=j_3\}} \right| \\ &= o(p^2 n^{-a}). \end{aligned}$$

*Case 2.3* We discuss the cases where  $j_1 \neq j_3$  and  $j_1 \neq j_4$ . If  $x_{i,j}$ 's are independent as in Section B.1.1.1, we know  $\mathbf{E}(x_{i_1, j_1} x_{i_1, j_2} x_{i_1, j_3} x_{i_1, j_4}) =$

$E(x_{i_1, j_1})E(\text{other terms}) = 0$ ; thus by (B.1.8), (B.1.3) = 0 under this setting. Similarly to *Case 2.1*, under Condition 2.2, (B.1.3) may be no longer 0, and we will discuss the value of (B.1.3) using the threshold  $K_0$  in (B.1.9).

To evaluate (B.1.3), by (B.1.8), we examine  $E(x_{i_1, j_1} x_{i_1, j_2} x_{i_1, j_3} x_{i_1, j_4})$ . Let  $(\tilde{j}_1, \tilde{j}_2, \tilde{j}_3, \tilde{j}_4)$  be the ordered version of  $(j_1, j_2, j_3, j_4)$  satisfying  $\tilde{j}_1 \leq \tilde{j}_2 \leq \tilde{j}_3 \leq \tilde{j}_4$ , then  $E(x_{i_1, j_1} x_{i_1, j_2} x_{i_1, j_3} x_{i_1, j_4}) = E(x_{i_1, \tilde{j}_1} x_{i_1, \tilde{j}_2} x_{i_1, \tilde{j}_3} x_{i_1, \tilde{j}_4})$ . Under the considered cases where  $j_1 \neq j_3$  and  $j_1 \neq j_4$ , at least one of the two equations,  $E(x_{i_1, \tilde{j}_1} x_{i_1, \tilde{j}_2}) = 0$  and  $E(x_{i_1, \tilde{j}_3} x_{i_1, \tilde{j}_4}) = 0$ , holds. It follows that  $E(x_{i_1, \tilde{j}_1} x_{i_1, \tilde{j}_2} x_{i_1, \tilde{j}_3} x_{i_1, \tilde{j}_4}) = \text{cov}(x_{i_1, \tilde{j}_1} x_{i_1, \tilde{j}_2}, x_{i_1, \tilde{j}_3} x_{i_1, \tilde{j}_4})$ . We thus can write

$$\begin{aligned}
\text{(B.1.12)} \quad |E(x_{i_1, j_1} x_{i_1, j_2} x_{i_1, j_3} x_{i_1, j_4})| &= |E(x_{i_1, \tilde{j}_1} x_{i_1, \tilde{j}_2} x_{i_1, \tilde{j}_3} x_{i_1, \tilde{j}_4})| \\
&= |\text{cov}(x_{i_1, \tilde{j}_1} x_{i_1, \tilde{j}_2}, x_{i_1, \tilde{j}_3} x_{i_1, \tilde{j}_4})| \\
&= |\text{cov}(x_{i_1, \tilde{j}_1}, x_{i_1, \tilde{j}_2} x_{i_1, \tilde{j}_3} x_{i_1, \tilde{j}_4})| \\
&= |\text{cov}(x_{i_1, \tilde{j}_1} x_{i_1, \tilde{j}_2} x_{i_1, \tilde{j}_3}, x_{i_1, \tilde{j}_4})|.
\end{aligned}$$

We next discuss the value of (B.1.12) based on the the maximum distance between the indexes in  $(\tilde{j}_1, \tilde{j}_2, \tilde{j}_3, \tilde{j}_4)$ , which is defined as

$$\text{(B.1.13)} \quad \kappa_m = \max\{|\tilde{j}_2 - \tilde{j}_1|, |\tilde{j}_3 - \tilde{j}_2|, |\tilde{j}_4 - \tilde{j}_3|\}.$$

We evaluate (B.1.12) when  $\kappa_m > K_0$  and  $\kappa_m \leq K_0$ , respectively. First, if  $\kappa_m > K_0$ , by  $E(\mathbf{x}) = \mathbf{0}$ , Conditions 2.1, 2.2, and Lemma B.0.1, we have (B.1.12)  $\leq C\delta^{\frac{K_0\epsilon}{2+\epsilon}} = O(p^{-(4+\mu)})$ . If  $\kappa_m \leq K_0$ , by Condition 2.1, (B.1.12) =  $O(1)$ . It follows that  $Q(\mathbf{i}, j_1, j_2, \tilde{\mathbf{i}}, j_3, j_4) \mathbf{1}_{\{S_{nem}, j_1 \neq j_3, j_1 \neq j_4, \kappa_m > K_0\}} = O(p^{-(4+\mu)})$ , and  $Q(\mathbf{i}, j_1, j_2, \tilde{\mathbf{i}}, j_3, j_4) \mathbf{1}_{\{S_{nem}, j_1 \neq j_3, j_1 \neq j_4, \kappa_m \leq K_0\}} = O(1)$ , where the event  $S_{nem}$  is defined in *Case 2.1*. Note that the total number of  $(j_1, j_2, j_3, j_4)$  tuples satisfying  $\kappa_m > K_0$  and  $\kappa_m \leq K_0$  are  $O(p^4)$  and  $O(pK_0^3)$ , respectively. Thus

$$\begin{aligned}
\text{(B.1.14)} \quad & \left| \sum_{\substack{1 \leq j_1 \neq j_2 \leq p; \\ 1 \leq j_3 \neq j_4 \leq p}} \sum_{\substack{0 \leq c \leq a; \\ \mathbf{i}, \tilde{\mathbf{i}} \in \mathcal{P}(n, a+c)}} F(c, c, a) Q(\mathbf{i}, j_1, j_2, \tilde{\mathbf{i}}, j_3, j_4) \mathbf{1}_{\{S_{nem}, j_1 \neq j_3, j_1 \neq j_4\}} \right| \\
& \leq \sum_{\substack{1 \leq j_1 \neq j_2 \leq p; \\ 1 \leq j_3 \neq j_4 \leq p}} \sum_{\substack{0 \leq c \leq a; \\ \mathbf{i}, \tilde{\mathbf{i}} \in \mathcal{P}(n, a+c)}} |F(c, c, a)| \times \mathbf{1}_{\{S_{nem}, j_1 \neq j_3, j_1 \neq j_4\}} \\
& \quad \times \left[ O(p^{-(4+\mu)}) \mathbf{1}_{\{\kappa_m > K_0\}} + C \times \mathbf{1}_{\{\kappa_m \leq K_0\}} \right] \\
& = \sum_{c=1}^{a-1} n^{-(a+c)} \{p^2 O(p^{-(4+\mu)}) + O(1) p K_0^3\} = o(p^2 n^{-a}).
\end{aligned}$$

*Case 2.4* If  $j_2 \neq j_3$  and  $j_2 \neq j_4$ , similarly to *Case 2.3*, we have

$$(B.1.15) \left| \sum_{\substack{1 \leq j_1 \neq j_2 \leq p; \\ 1 \leq j_3 \neq j_4 \leq p}} \sum_{\substack{0 \leq c \leq a; \\ \mathbf{i}, \tilde{\mathbf{i}} \in \mathcal{P}(n, a+c)}} F(c, c, a) Q(\mathbf{i}, j_1, j_2, \tilde{\mathbf{i}}, j_3, j_4) \mathbf{1}_{\{S_{nem}, j_2 \neq j_3, j_2 \neq j_4\}} \right| \\ = o(p^2 n^{-a}).$$

By (B.1.10), (B.1.11), (B.1.14), (B.1.15), and the definition of  $S_{nem}$ , we obtain

$$(B.1.16) \sum_{\substack{1 \leq j_1 \neq j_2 \leq p; \\ 1 \leq j_3 \neq j_4 \leq p}} \sum_{\substack{0 \leq c \leq a; \\ \mathbf{i}, \tilde{\mathbf{i}} \in \mathcal{P}(n, a+c)}} F(c, c, a) Q(\mathbf{i}, j_1, j_2, \tilde{\mathbf{i}}, j_3, j_4) \\ \times \mathbf{1}_{\{\{\mathbf{i}\} = \{\tilde{\mathbf{i}}\}, 1 \leq c \leq a-1, \{\mathbf{i}\}_{(1)} \neq \{\tilde{\mathbf{i}}\}_{(1)}, \{\mathbf{i}\}_{(1)} \cap \{\tilde{\mathbf{i}}\}_{(1)} \neq \emptyset\}} = o(p^2 n^{-a}).$$

*Case 3.* We consider  $\{\mathbf{i}\} = \{\tilde{\mathbf{i}}\}$ ,  $1 \leq c \leq a-1$ , and  $\{\mathbf{i}\}_{(1)} \cap \{\tilde{\mathbf{i}}\}_{(1)} = \emptyset$ . Here  $\{\mathbf{i}\}_{(1)}$  and  $\{\tilde{\mathbf{i}}\}_{(1)}$  are not empty as  $c \leq a-1$ . Suppose there exist  $i_1 \in \{\mathbf{i}\}_{(1)}$  and  $i_2 \in \{\tilde{\mathbf{i}}\}_{(1)}$  with  $i_1 \neq i_2$ . Since  $\{\mathbf{i}\} = \{\tilde{\mathbf{i}}\}$  and  $\{\mathbf{i}\}_{(1)} \cap \{\tilde{\mathbf{i}}\}_{(1)} = \emptyset$ , we know  $i_1 \in \{\tilde{\mathbf{i}}\}_{(2)} \cup \{\tilde{\mathbf{i}}\}_{(3)}$  and  $i_2 \in \{\mathbf{i}\}_{(2)} \cup \{\mathbf{i}\}_{(3)}$ . Without loss of generality, we assume  $i_1 \in \{\tilde{\mathbf{i}}\}_{(2)}$  and  $i_2 \in \{\mathbf{i}\}_{(2)}$ , then

$$(B.1.3) = \mathbb{E}(x_{i_1, j_1} x_{i_1, j_2} x_{i_1, j_3}) \times \mathbb{E}(x_{i_2, j_3} x_{i_2, j_4} x_{i_2, j_1}) \times \mathbb{E}(\text{other terms}).$$

To evaluate (B.1.3), we examine  $\mathbb{E}(x_{i_1, j_1} x_{i_1, j_2} x_{i_1, j_3}) \mathbb{E}(x_{i_2, j_3} x_{i_2, j_4} x_{i_2, j_1})$ . As  $\mathbb{E}(\mathbf{x}) = \mathbf{0}$ , we can write

$$\mathbb{E}(x_{i_1, j_1} x_{i_1, j_2} x_{i_1, j_3}) = \text{cov}(x_{i_1, j_1}, x_{i_1, j_2} x_{i_1, j_3}) = \text{cov}(x_{i_1, j_2}, x_{i_1, j_1} x_{i_1, j_3}) \\ = \text{cov}(x_{i_1, j_3}, x_{i_1, j_1} x_{i_1, j_2}),$$

and similarly,

$$\mathbb{E}(x_{i_2, j_3} x_{i_2, j_4} x_{i_2, j_1}) = \text{cov}(x_{i_2, j_3}, x_{i_2, j_4} x_{i_2, j_1}) = \text{cov}(x_{i_2, j_4}, x_{i_2, j_3} x_{i_2, j_1}) \\ = \text{cov}(x_{i_2, j_1}, x_{i_2, j_3} x_{i_2, j_4}).$$

Recall  $\kappa_m$  in (B.1.13) and  $K_0$  in (B.1.9). If  $\kappa_m > K_0$ , by Conditions 2.1 and 2.2, and Lemma B.0.1, we have

$$(B.1.17) \left| \mathbb{E}(x_{i_1, j_1} x_{i_1, j_2} x_{i_1, j_3}) \mathbb{E}(x_{i_2, j_3} x_{i_2, j_4} x_{i_2, j_1}) \right| \leq C \delta^{\frac{K_0 \epsilon}{2+\epsilon}} = O(1) p^{-(4+\mu)}.$$

If  $\kappa_m \leq K_0$ , by Condition 2.1,  $\mathbb{E}(x_{i_1, j_1} x_{i_1, j_2} x_{i_1, j_3}) \mathbb{E}(x_{i_2, j_3} x_{i_2, j_4} x_{i_2, j_1}) = O(1)$ . Note that the total number of  $(j_1, j_2, j_3, j_4)$  tuples satisfying  $\kappa_m > K_0$  and

$\kappa_m \leq K_0$  are  $O(p^4)$  and  $O(pK_0^3)$ , respectively. Therefore,

$$\begin{aligned}
\text{(B.1.18)} & \left| \sum_{\substack{1 \leq j_1 \neq j_2 \leq p; \\ 1 \leq j_3 \neq j_4 \leq p}} \sum_{\substack{0 \leq c \leq a; \\ \mathbf{i}, \tilde{\mathbf{i}} \in \mathcal{P}(n, a+c)}} F(c, c, a) Q(\mathbf{i}, j_1, j_2, \tilde{\mathbf{i}}, j_3, j_4) \mathbf{1}_{\left\{ \begin{array}{l} \{\mathbf{i}\} = \{\tilde{\mathbf{i}}\}; \\ 1 \leq c \leq a-1; \\ \{\mathbf{i}\}_{(1)} \cap \{\tilde{\mathbf{i}}\}_{(1)} = \emptyset \end{array} \right\}} \right| \\
& \leq \sum_{\substack{1 \leq j_1 \neq j_2 \leq p; \\ 1 \leq j_3 \neq j_4 \leq p}} \sum_{\substack{0 \leq c \leq a; \\ \mathbf{i}, \tilde{\mathbf{i}} \in \mathcal{P}(n, a+c)}} \left| F(c, c, a) \right| \times \mathbf{1}_{\left\{ \begin{array}{l} \{\mathbf{i}\} = \{\tilde{\mathbf{i}}\}; 1 \leq c \leq a-1; \\ \{\mathbf{i}\}_{(1)} \cap \{\tilde{\mathbf{i}}\}_{(1)} = \emptyset \end{array} \right\}} \\
& \quad \times \left[ Cp^{-(4+\mu)} \mathbf{1}_{\{\kappa_m > K_0\}} + C \mathbf{1}_{\{\kappa_m \leq K_0\}} \right] \\
& = \sum_{c=1}^{a-1} n^{-(a+c)} \{O(1)p^4 p^{-(4+\mu)} + O(1)pK_0^3\} = o(p^2 n^{-a}).
\end{aligned}$$

*Case 4.* When  $\{\mathbf{i}\} = \{\tilde{\mathbf{i}}\}$  and  $c = a$ , we know  $\{\mathbf{i}\}_{(1)} = \{\tilde{\mathbf{i}}\}_{(1)} = \emptyset$  and  $\{\mathbf{i}\}_{(2)} \cup \{\mathbf{i}\}_{(3)} = \{\tilde{\mathbf{i}}\}_{(2)} \cup \{\tilde{\mathbf{i}}\}_{(3)}$ . Then similarly *Case 1*, we have

$$\begin{aligned}
\text{(B.1.19)} & \left| \sum_{\substack{1 \leq j_1 \neq j_2 \leq p; \\ 1 \leq j_3 \neq j_4 \leq p}} \sum_{\mathbf{i}, \tilde{\mathbf{i}} \in \mathcal{P}(n, a+c)} F(c, c, a) Q(\mathbf{i}, j_1, j_2, \tilde{\mathbf{i}}, j_3, j_4) \mathbf{1}_{\{\{\mathbf{i}\} = \{\tilde{\mathbf{i}}\}, c=a\}} \right| \\
& = o(p^2 n^{-a}).
\end{aligned}$$

In summary, by (B.1.2), (B.1.4)–(B.1.7), (B.1.16), (B.1.18), and (B.1.19),

$$\text{(B.1.20)} \quad \text{var}\{\mathcal{U}(a)\} = \frac{a!}{P^a} \sum_{\substack{1 \leq j_1 \neq j_2 \leq p \\ 1 \leq j_3 \neq j_4 \leq p}} \{E(x_{i,j_1} x_{i,j_2} x_{i,j_3} x_{i,j_4})\}^a + o(p^2 n^{-a}).$$

Note that we assume  $E(\mathbf{x}) = \mathbf{0}$ . For the general case with  $E(\mathbf{x}) = \boldsymbol{\mu}$ , by Proposition 2.1, it is equivalent to replace  $x_{i,j}$  by  $x_{i,j} - \mu_j$  in (B.1.20).

We next show that  $\text{var}\{\tilde{\mathcal{U}}(a)\} = \text{(B.1.5)}$  and  $\text{var}[\tilde{\mathcal{U}}^*(a)] = o(p^2 n^{-a})$ . First note that  $E\{\tilde{\mathcal{U}}(a)\} = E\{\tilde{\mathcal{U}}^*(a)\} = 0$  under  $H_0$  as  $E(\mathbf{x}) = \mathbf{0}$ . Then it suffices to show  $E\{\{\tilde{\mathcal{U}}(a)\}^2\} = \text{(B.1.5)}$  and  $E\{\{\tilde{\mathcal{U}}^*(a)\}^2\} = o(p^2 n^{-a})$ . By the definition of  $\tilde{\mathcal{U}}(a)$  in (2.5), we know

$$\begin{aligned}
\text{(B.1.21)} & E\{\tilde{\mathcal{U}}^2(a)\} \\
& = \sum_{\substack{1 \leq j_1 \neq j_2 \leq p \\ 1 \leq j_3 \neq j_4 \leq p}} \sum_{\substack{0 \leq c_1, c_2 \leq a; \\ \mathbf{i} \in \mathcal{P}(n, a+c_1); \\ \tilde{\mathbf{i}} \in \mathcal{P}(n, a+c_2)}} F(c_1, c_2, a) Q(\mathbf{i}, j_1, j_2, \tilde{\mathbf{i}}, j_3, j_4) \times \mathbf{1}_{\{c_1=c_2=0\}}.
\end{aligned}$$

Therefore,  $E\{\tilde{\mathcal{U}}^2(a)\} = (\text{B.1.5})$  from previous discussion. Moreover, as  $\tilde{\mathcal{U}}^*(a) = \mathcal{U}(a) - \tilde{\mathcal{U}}(a)$ , we know

$$(B.1.22) \quad \begin{aligned} \tilde{\mathcal{U}}^*(a) &= \sum_{c=0}^a \mathbf{1}_{\{c \geq 1\}} \sum_{1 \leq j_1 \neq j_2 \leq p} (-1)^c \binom{a}{c} \frac{1}{P^{a+c}} \sum_{\mathbf{i} \in \mathcal{P}(n, a+c)} \\ &\quad \times \prod_{k=1}^{a-c} (x_{i_k, j_1} x_{i_k, j_2}) \prod_{k=a-c+1}^a x_{i_k, j_1} \prod_{k=a+1}^{a+c} x_{i_k, j_2}. \end{aligned}$$

It follows that

$$(B.1.23) \quad \begin{aligned} E[\{\tilde{\mathcal{U}}^*(a)\}^2] &= \sum_{\substack{1 \leq j_1 \neq j_2 \leq p \\ 1 \leq j_3 \neq j_4 \leq p}} \sum_{\substack{0 \leq c_1, c_2 \leq a; \\ \mathbf{i} \in \mathcal{P}(n, a+c_1); \\ \tilde{\mathbf{i}} \in \mathcal{P}(n, a+c_2)}} F(c_1, c_2, a) Q(\mathbf{i}, j_1, j_2, \tilde{\mathbf{i}}, j_3, j_4) \times \mathbf{1}_{\{c_1 \geq 1, c_2 \geq 1\}}. \end{aligned}$$

Also by previous discussion, we know  $E[\{\tilde{\mathcal{U}}^*(a)\}^2] = o(p^2 n^{-a})$ .

To finish the proof of Lemma A.2.1, it remains to show  $\text{var}\{\tilde{\mathcal{U}}(a)\} = (\text{B.1.5}) = \Theta(p^2 n^{-a})$ , and it suffices to prove

$$(B.1.24) \quad \sum_{\substack{1 \leq j_1 \neq j_2 \leq p; \\ 1 \leq j_3 \neq j_4 \leq p}} \{E(x_{i, j_1} x_{i, j_2} x_{i, j_3} x_{i, j_4})\}^a = \Theta(p^2).$$

To prove (B.1.24), we examine  $E(x_{i, j_1} x_{i, j_2} x_{i, j_3} x_{i, j_4})$ . Similarly to *Case 2* above, as  $j_1 \neq j_2$  and  $j_3 \neq j_4$  in summation, it suffices to discuss four cases  $\{j_1 = j_3 \text{ and } j_2 = j_4\}$ ,  $\{j_1 = j_4 \text{ and } j_2 = j_3\}$ ,  $\{j_1 \neq j_3 \text{ and } j_1 \neq j_4\}$ , and  $\{j_2 \neq j_3 \text{ and } j_2 \neq j_4\}$ .

If  $j_1 = j_3$ ,  $j_2 = j_4$ , and  $|j_1 - j_2| > K_0$ , then by Conditions 2.1, 2.2, and Lemma B.0.1, we have

$$\begin{aligned} |E(x_{i, j_1} x_{i, j_2} x_{i, j_3} x_{i, j_4})| &= E(x_{i, j_1}^2 x_{i, j_2}^2) = \text{cov}(x_{i, j_1}^2, x_{i, j_2}^2) + E(x_{i, j_1}^2) E(x_{i, j_2}^2) \\ &\geq \Theta(1) - |\text{cov}(x_{i, j_1}^2, x_{i, j_2}^2)| \geq \Theta(1) - C \delta^{\frac{K_0 \epsilon}{2+\epsilon}} = \Theta(1). \end{aligned}$$

If  $j_1 = j_3$ ,  $j_2 = j_4$ , and  $|j_1 - j_2| \leq K_0$ , by Condition 2.1,  $E(x_{i, j_1} x_{i, j_2} x_{i, j_3} x_{i, j_4}) = O(1)$ . Note that  $(j_1, j_2)$  pairs satisfying  $|j_1 - j_2| > K_0$  and  $|j_1 - j_2| \leq K_0$  are

$O(p^2)$  and  $O(pK_0)$ , respectively. Thus,

$$\begin{aligned}
\text{(B.1.25)} \quad & \sum_{\substack{1 \leq j_1 \neq j_2 \leq p; \\ 1 \leq j_3 \neq j_4 \leq p}} [\mathbb{E}(x_{i,j_1} x_{i,j_2} x_{i,j_3} x_{i,j_4})]^a \mathbf{1}_{\{j_1=j_3, j_2=j_4\}} \\
&= \sum_{\substack{1 \leq j_1 \neq j_2 \leq p; \\ 1 \leq j_3 \neq j_4 \leq p}} \left[ \mathbb{E} \left( \prod_{t=1}^4 x_{i,j_t} \right) \right]^a \mathbf{1}_{\{j_1=j_3, j_2=j_4\}} [\mathbf{1}_{\{|j_1-j_2|>K_0\}} + \mathbf{1}_{\{|j_1-j_2|\leq K_0\}}] \\
&= \Theta(p^2) + O(pK_0) = \Theta(p^2).
\end{aligned}$$

If  $j_1 = j_4$  and  $j_2 = j_3$ , similarly to (B.1.25), we have

$$\text{(B.1.26)} \quad \sum_{\substack{1 \leq j_1 \neq j_2 \leq p \\ 1 \leq j_3 \neq j_4 \leq p}} [\mathbb{E}(x_{i,j_1} x_{i,j_2} x_{i,j_3} x_{i,j_4})]^a \mathbf{1}_{\{j_1=j_4, j_2=j_3\}} = \Theta(p^2).$$

If  $j_1 \neq j_3$  and  $j_1 \neq j_4$ , we know (B.1.12) holds. Recall  $K_0$  in (B.1.9) and  $\kappa_m$  in (B.1.13). Similarly to the analysis of (B.1.14), we have

$$\begin{aligned}
\text{(B.1.27)} \quad & \sum_{\substack{1 \leq j_1 \neq j_2 \leq p \\ 1 \leq j_3 \neq j_4 \leq p}} [\mathbb{E}(x_{i,j_1} x_{i,j_2} x_{i,j_3} x_{i,j_4})]^a \mathbf{1}_{\{j_1 \neq j_3, j_1 \neq j_4\}} \\
&= \sum_{\substack{1 \leq j_1 \neq j_2 \leq p; \\ 1 \leq j_3 \neq j_4 \leq p}} \left[ \mathbb{E} \left( \prod_{t=1}^4 x_{i,j_t} \right) \right]^a \mathbf{1}_{\{j_1 \neq j_3, j_1 \neq j_4\}} [\mathbf{1}_{\{\kappa_m > K_0\}} + \mathbf{1}_{\{\kappa_m \leq K_0\}}] \\
&= o(p^2).
\end{aligned}$$

If  $j_2 \neq j_3$  and  $j_2 \neq j_4$ , similarly to (B.1.27), we have

$$\text{(B.1.28)} \quad \sum_{\substack{1 \leq j_1 \neq j_2 \leq p \\ 1 \leq j_3 \neq j_4 \leq p}} [\mathbb{E}(x_{i,j_1} x_{i,j_2} x_{i,j_3} x_{i,j_4})]^a \mathbf{1}_{\{j_2 \neq j_3, j_2 \neq j_4\}} = o(p^2).$$

In summary, combining (B.1.25)–(B.1.28), we have

$$\text{(B.1.29)} \quad \sum_{\substack{1 \leq j_1 \neq j_2 \leq p; \\ 1 \leq j_3 \neq j_4 \leq p}} \left[ \mathbb{E} \left( \prod_{t=1}^4 x_{i,j_t} \right) \right]^a \simeq 2 \sum_{1 \leq j_1 \neq j_2 \leq p} \{\mathbb{E}(x_{i,j_1}^2 x_{i,j_2}^2)\}^a.$$

Combining (B.1.20), (B.1.21) and (B.1.29), Lemma A.2.1 is proved.



*B.1.1.3. Proof under Condition 2.2\**. In this section, we prove Lemma A.2.1 by substituting Condition 2.2 with Condition 2.2\*. Following the notation in Section B.1.1.2, we have

$$\text{var}\{\mathcal{U}(a)\} = \sum_{\substack{1 \leq j_1 \neq j_2 \leq p; \\ 1 \leq j_3 \neq j_4 \leq p}} \sum_{\substack{0 \leq c_1, c_2 \leq a; \\ \mathbf{i} \in \mathcal{P}(n, a+c_1); \\ \tilde{\mathbf{i}} \in \mathcal{P}(n, a+c_2)}} F(c_1, c_2, a) \times Q(\mathbf{i}, j_1, j_2, \tilde{\mathbf{i}}, j_3, j_4).$$

When  $\{\mathbf{i}\} \neq \{\tilde{\mathbf{i}}\}$ , under  $H_0$ , we know (B.1.3) = 0 and (B.1.4) holds similarly. As  $\{\mathbf{i}\}$  and  $\{\tilde{\mathbf{i}}\}$  are of sizes  $a+c_1$  and  $a+c_2$  respectively, in the following we consider  $\{\mathbf{i}\} = \{\tilde{\mathbf{i}}\}$ , which induces  $c_1 = c_2$  and we write  $c_1 = c_2 = c$ .

When  $\{\mathbf{i}\} = \{\tilde{\mathbf{i}}\}$  and  $c = 0$ , we know (B.1.5) also holds similarly, and  $\text{var}\{\tilde{\mathcal{U}}(a)\} =$  (B.1.5) by (B.1.21). By Condition 2.2\*,

$$\begin{aligned} \text{(B.1.30)} \quad & \mathbb{E}(x_{i,j_1} x_{i,j_2} x_{i,j_3} x_{i,j_4}) \\ &= \kappa_1 \left\{ \mathbb{E}(x_{i,j_1} x_{i,j_2}) \mathbb{E}(x_{i,j_3} x_{i,j_4}) + \mathbb{E}(x_{i,j_1} x_{i,j_3}) \mathbb{E}(x_{i,j_2} x_{i,j_4}) \right. \\ & \quad \left. + \mathbb{E}(x_{i,j_1} x_{i,j_4}) \mathbb{E}(x_{i,j_2} x_{i,j_3}) \right\}. \end{aligned}$$

Since  $j_1 \neq j_2$  and  $j_3 \neq j_4$ , we know under  $H_0$ , (B.1.30)  $\neq 0$  only when  $\{j_1 = j_3, j_2 = j_4\}$  or  $\{j_1 = j_4, j_2 = j_3\}$ ; and then (B.1.30) =  $\kappa_1 \mathbb{E}(x_{i,j_1}^2) \mathbb{E}(x_{i,j_2}^2)$ . Thus

$$\text{(B.1.5)} = 2a!(P_a^n)^{-1} \sum_{1 \leq j_1 \neq j_2 \leq p} \{\kappa_1 \mathbb{E}(x_{i,j_1}^2) \mathbb{E}(x_{i,j_2}^2)\}^a = \Theta(p^2 n^{-a}),$$

where the second equation follows from Condition 2.1.

When  $\{\mathbf{i}\} = \{\tilde{\mathbf{i}}\}$  and  $c \geq 1$ ,  $|\{\mathbf{i}\}_{(2)}| = |\{\mathbf{i}\}_{(3)}| = |\{\tilde{\mathbf{i}}\}_{(2)}| = |\{\tilde{\mathbf{i}}\}_{(3)}| > 0$ . Without loss of generality, we first consider an index  $i \in \{\mathbf{i}\}_{(2)}$ , and discuss four cases.

*Case 1.1* If  $i \notin \{\tilde{\mathbf{i}}\}$ , since  $\mathbb{E}(\mathbf{x}) = \mathbf{0}$ , we know

$$\text{(B.1.3)} = \mathbb{E}(x_{i,j_1}) \times \mathbb{E}(\text{all the remaining terms}) = 0.$$

*Case 1.2* If  $i \in \{\tilde{\mathbf{i}}\}_{(2)}$ ,

$$\text{(B.1.3)} = \mathbb{E}(x_{i,j_1} x_{i,j_3}) \times \mathbb{E}(\text{all the remaining terms}),$$

which is nonzero when  $j_1 = j_3$ .

*Case 1.3* If  $i \in \{\tilde{\mathbf{i}}\}_{(3)}$ ,

$$\text{(B.1.3)} = \mathbb{E}(x_{i,j_1} x_{i,j_4}) \times \mathbb{E}(\text{all the remaining terms}) = 0,$$

which is nonzero when  $j_1 = j_4$ .

*Case 1.4* If  $i \in \{\tilde{\mathbf{i}}\}_{(1)}$ , this suggests  $\{\mathbf{i}\}_{(1)} \neq \emptyset$  and thus  $c \leq a - 1$ . By Condition 2.2\*,

$$(B.1.31) \quad (B.1.3) = E(x_{i,j_1} x_{i,j_3} x_{i,j_4}) \times E[\text{all the remaining terms}] = 0.$$

When  $\{\mathbf{i}\} = \{\tilde{\mathbf{i}}\}$  and  $c \leq a - 1$ , we have  $\{\mathbf{i}\}_{(1)} \neq \emptyset$ . We assume without loss of generality that an index  $i \in \{\mathbf{i}\}_{(1)}$ , and then discuss two cases.

*Case 2.1* If  $i \in \{\tilde{\mathbf{i}}\}_{(2)} \cup \{\tilde{\mathbf{i}}\}_{(3)}$ , symmetrically, (B.1.3) takes a form similarly to that in (B.1.31), which is 0 under  $H_0$  by Condition 2.2\*.

*Case 2.2* If  $i \notin \{\tilde{\mathbf{i}}\}$ , by  $j_1 \neq j_2$ , we know under  $H_0$ ,

$$(B.1.3) = E(x_{i,j_1} x_{i,j_2}) \times E(\text{all the remaining terms}) = 0.$$

In summary, (B.1.3)  $\neq 0$  only when one of the following two cases holds:

1.  $j_1 = j_3, j_2 = j_4, \{\mathbf{i}\}_{(1)} = \{\tilde{\mathbf{i}}\}_{(1)}, \{\mathbf{i}\}_{(2)} = \{\tilde{\mathbf{i}}\}_{(2)}, \{\mathbf{i}\}_{(3)} = \{\tilde{\mathbf{i}}\}_{(3)}$ ;
2.  $j_1 = j_4, j_2 = j_3, \{\mathbf{i}\}_{(1)} = \{\tilde{\mathbf{i}}\}_{(1)}, \{\mathbf{i}\}_{(2)} = \{\tilde{\mathbf{i}}\}_{(3)}, \{\mathbf{i}\}_{(3)} = \{\tilde{\mathbf{i}}\}_{(2)}$ .

Under these two cases, (B.1.3) =  $\{\kappa_1 E(x_{i,j_1}^2 x_{i,j_2}^2)\}^{a-c} \{E(x_{i,j_1}^2)\}^c \{E(x_{i,j_2}^2)\}^c$ . It follows that when  $\{\mathbf{i}\} = \{\tilde{\mathbf{i}}\}$  and  $c \geq 1$ ,

$$(B.1.32) \quad \sum_{\substack{1 \leq j_1 \neq j_2 \leq p; \\ 1 \leq j_3 \neq j_4 \leq p}} \sum_{\substack{0 \leq c \leq a; \\ \mathbf{i}, \tilde{\mathbf{i}} \in \mathcal{P}(n, a+c)}} F(c, c, a) Q(\mathbf{i}, j_1, j_2, \tilde{\mathbf{i}}, j_3, j_4) \mathbf{1}_{\{\{\mathbf{i}} = \{\tilde{\mathbf{i}}\}, c \geq 1\}}$$

$$= \sum_{\substack{1 \leq c \leq a; \\ 1 \leq j_1 \neq j_2 \leq p}} \binom{a}{c}^2 \frac{2}{P_{a+c}^n} \{\kappa_1 E(x_{i,j_1}^2 x_{i,j_2}^2)\}^{a-c} \{E(x_{i,j_1}^2)\}^c \{E(x_{i,j_2}^2)\}^c$$

$$= \sum_{c=1}^a O(p^2 n^{-(a+c)}) = o(pn^{-a}),$$

where the last two equations use Condition 2.1. Similarly to Section B.1.1, by (B.1.4) and (B.1.23), we know  $\text{var}\{\tilde{\mathcal{U}}^*(a)\} = (B.1.32) = o(pn^{-a}) = o(1) \text{var}\{\tilde{\mathcal{U}}(a)\}$ .

REMARK B.1.  $\kappa_1$  is assumed to be a constant in Condition 2.2\*. But the similar arguments apply in the proof if  $\kappa_1$  changes with  $n, p$  but converges to a constant.

B.1.2. *Proof of Lemma A.2.2 (on Page 4, Section A.2).* Note that for two integers  $a \neq b$ ,  $\text{cov}\{\mathcal{U}(a)/\sigma(a), \mathcal{U}(b)/\sigma(b)\} = E[\mathcal{U}(a)\mathcal{U}(b)/\{\sigma(a)\sigma(b)\}]$ ,

and by Lemma A.2.1,  $\text{var}\{\tilde{\mathcal{U}}^*(a)\} = o(1)\text{var}\{\tilde{\mathcal{U}}(a)\}$ . Recall  $\sigma^2(a) = \text{var}\{\mathcal{U}(a)\}$  from definition. Then by Cauchy-Schwarz inequality, we have

$$\text{cov}\{\mathcal{U}(a)/\sigma(a), \mathcal{U}(b)/\sigma(b)\} = \text{E}\{\tilde{\mathcal{U}}(a)\tilde{\mathcal{U}}(b)\}/\{\sigma(a)\sigma(b)\} + o(1).$$

In addition,

$$\text{E}\{\tilde{\mathcal{U}}(a)\tilde{\mathcal{U}}(b)\} = \sum_{\substack{1 \leq j_1 \neq j_2 \leq p, \\ 1 \leq j_3 \neq j_4 \leq p}} \sum_{\substack{\mathbf{i} \in \mathcal{P}(n,a), \\ \tilde{\mathbf{i}} \in \mathcal{P}(n,b)}} \text{E}\left\{ \prod_{k=1}^a (x_{i_k, j_1} x_{i_k, j_2}) \prod_{\tilde{k}=1}^b (x_{\tilde{i}_{\tilde{k}}, j_3} x_{\tilde{i}_{\tilde{k}}, j_4}) \right\}.$$

Since  $a \neq b$ , we know the two sets  $\{i_1, \dots, i_a\}$  and  $\{\tilde{i}_1, \dots, \tilde{i}_b\}$  can not be the same. Following similar analysis to that of (B.1.1), as  $\text{E}(x_{i, j_1} x_{i, j_2}) = 0$  under  $H_0$ , we have  $\text{E}\{\tilde{\mathcal{U}}(a)\tilde{\mathcal{U}}(b)\} = 0$ , and thus  $\text{cov}\{\mathcal{U}(a)/\sigma(a), \mathcal{U}(b)/\sigma(b)\} = o(1)$ .

In particular, we note that given Lemma A.2.1, the argument does not depend on whether Condition 2.2 or 2.2\* is specified.

B.1.3. *Proof of Lemma A.2.3 (on Page 5, Section A.2).* We first show for  $1 \leq k_1 \neq k_2 \leq n$ ,  $\text{E}(D_{n, k_1} D_{n, k_2}) = 0$ . Without loss of generality, we consider  $k_1 < k_2$ . Then  $\text{E}_{k_1} Z_n \in \mathcal{F}_{k_2}$ , and

$$\begin{aligned} & \text{E}(D_{n, k_1} D_{n, k_2}) \\ &= \text{E}[(\text{E}_{k_1} Z_n - \text{E}_{k_1-1} Z_n)(\text{E}_{k_2} Z_n - \text{E}_{k_2-1} Z_n)] \\ &= \text{E}[\text{E}_{k_1} Z_n \times \text{E}_{k_2} Z_n - \text{E}_{k_1-1} Z_n \times \text{E}_{k_2} Z_n - \text{E}_{k_1} Z_n \times \text{E}_{k_2-1} Z_n \\ & \quad + \text{E}_{k_1-1} Z_n \times \text{E}_{k_2-1} Z_n] \\ &= \text{E}[(\text{E}_{k_1} Z_n) Z_n] - \text{E}[(\text{E}_{k_1-1} Z_n) Z_n] - \text{E}[(\text{E}_{k_1} Z_n) Z_n] + \text{E}[(\text{E}_{k_1-1} Z_n) Z_n] \\ &= 0. \end{aligned}$$

It follows that

$$\text{E}\left(\sum_{k=1}^n \pi_{n,k}^2\right) = \sum_{k=1}^n \text{E}(D_{n,k}^2) = \text{E}\left(\sum_{k=1}^n D_{n,k}\right)^2 = \text{var}(Z_n),$$

where the last equation uses the fact that  $\text{E}(D_{n,k}) = 0$  and  $Z_n = \sum_{k=1}^n D_{n,k}$  from construction.

In particular, we note that the argument does not depend on whether Condition 2.2 or 2.2\* is specified.

B.1.4. *Proof of Lemma A.2.4 (on Page 5, Section A.2).* For given finite integer  $a$ , we derive the expression of  $(\text{E}_k - \text{E}_{k-1})[\tilde{\mathcal{U}}(a)/\sigma(a)]$ . The form of  $A_{n,k,a_r}$  for a general finite integer  $a_r$  in Lemma A.2.4 follows similarly.

By the definition in (2.5), we know

$$(B.1.33) \quad (\mathbb{E}_k - \mathbb{E}_{k-1})\tilde{\mathcal{U}}(a) = (P_a^n)^{-1} \sum_{\substack{1 \leq j_1 \neq j_2 \leq p; \\ \mathbf{i} \in \mathcal{P}(n,a)}} (\mathbb{E}_k - \mathbb{E}_{k-1}) \left[ \prod_{t=1}^a x_{i_t, j_1} x_{i_t, j_2} \right].$$

To derive (B.1.33), we next examine the value of

$$(B.1.34) \quad (\mathbb{E}_k - \mathbb{E}_{k-1}) \left[ \prod_{t=1}^a x_{i_t, j_1} x_{i_t, j_2} \right].$$

We claim (B.1.34)  $\neq 0$  only when  $k \in \{i_1, \dots, i_a\}$ . If  $k \notin \{i_1, \dots, i_a\}$ , we assume without loss of generality that  $i_1, \dots, i_m < k$  and  $i_{m+1}, \dots, i_a > k$ . Then

$$\begin{aligned} & (\mathbb{E}_k - \mathbb{E}_{k-1}) \left[ \prod_{t=1}^a x_{i_t, j_1} x_{i_t, j_2} \right] \\ &= \left( \prod_{t=1}^m x_{i_t, j_1} x_{i_t, j_2} \right) \left[ \mathbb{E}_k \left( \prod_{t=m+1}^a x_{i_t, j_1} x_{i_t, j_2} \right) - \mathbb{E}_{k-1} \left( \prod_{t=m+1}^a x_{i_t, j_1} x_{i_t, j_2} \right) \right] \\ &= 0. \end{aligned}$$

Thus if (B.1.34)  $\neq 0$ , we know  $k \in \{i_1, \dots, i_a\}$ . In addition, we next show (B.1.34)  $\neq 0$  only when  $i_1, \dots, i_a \leq k$ . Suppose that if there exist some indexes in  $\{i_1, \dots, i_a\}$  that are greater than  $k$ , we assume without loss of generality that  $i_m = k$ ,  $i_1, \dots, i_{m-1} < k$ , and  $i_{m+1}, \dots, i_a > k$ . Then

$$\begin{aligned} \mathbb{E}_k \left( \prod_{t=1}^a x_{i_t, j_1} x_{i_t, j_2} \right) &= \left( \prod_{t=1}^m x_{i_t, j_1} x_{i_t, j_2} \right) \mathbb{E}_k \left( \prod_{t=m+1}^a x_{i_t, j_1} x_{i_t, j_2} \right) \\ &= \left( \prod_{t=1}^m x_{i_t, j_1} x_{i_t, j_2} \right) \mathbb{E} \left( \prod_{t=m+1}^a x_{i_t, j_1} x_{i_t, j_2} \right) = 0, \end{aligned}$$

and

$$\begin{aligned} \mathbb{E}_{k-1} \left( \prod_{t=1}^a x_{i_t, j_1} x_{i_t, j_2} \right) &= \left( \prod_{t=1}^{m-1} x_{i_t, j_1} x_{i_t, j_2} \right) \mathbb{E}_{k-1} \left( x_{k, j_1} x_{k, j_2} \prod_{t=m+1}^a x_{i_t, j_1} x_{i_t, j_2} \right) \\ &= \left( \prod_{t=1}^{m-1} x_{i_t, j_1} x_{i_t, j_2} \right) \mathbb{E}(x_{k, j_1} x_{k, j_2}) \prod_{t=m+1}^a \mathbb{E}(x_{i_t, j_1} x_{i_t, j_2}) = 0. \end{aligned}$$

Therefore, we know (B.1.34)  $\neq 0$  when  $k \in \{i_1, \dots, i_a\}$  and  $i_1, \dots, i_a \leq k$ .

When  $k < a$ , there exist some indexes in  $\{i_1, \dots, i_a\} > k$ . Thus (B.1.34) = 0, and (B.1.33) = 0. When  $k \geq a$ , assume without loss of generality that  $i_a = k$  and  $i_1, \dots, i_{a-1} \leq k-1$ , then

$$\mathbb{E}_{k-1} \left[ \left( \prod_{t=1}^{a-1} x_{i_t, j_1} x_{i_t, j_2} \right) x_{k, j_1} x_{k, j_2} \right] = \left( \prod_{t=1}^{a-1} x_{i_t, j_1} x_{i_t, j_2} \right) \mathbb{E}(x_{k, j_1} x_{k, j_2}) = 0,$$

and

$$\mathbb{E}_k \left[ \left( \prod_{t=1}^{a-1} x_{i_t, j_1} x_{i_t, j_2} \right) x_{k, j_1} x_{k, j_2} \right] = \left( \prod_{t=1}^{a-1} x_{i_t, j_1} x_{i_t, j_2} \right) x_{k, j_1} x_{k, j_2}.$$

In summary, for  $k \geq a$ ,

$$\begin{aligned} & (\mathbb{E}_k - \mathbb{E}_{k-1}) \frac{\tilde{\mathcal{U}}(a)}{\sigma(a)} \\ &= \frac{1}{\sigma(a) P_a^n} \sum_{\substack{1 \leq i_1 \neq \dots \neq i_{a-1} \leq k-1; \\ 1 \leq j_1 \neq j_2 \leq p}} \binom{a}{1} \times (\mathbb{E}_k - \mathbb{E}_{k-1}) \left[ \left( \prod_{t=1}^{a-1} x_{i_t, j_1} x_{i_t, j_2} \right) x_{k, j_1} x_{k, j_2} \right] \\ &= \frac{a}{\sigma(a) P_a^n} \sum_{1 \leq i_1 \neq \dots \neq i_{a-1} \leq k-1} \sum_{1 \leq j_1 \neq j_2 \leq p} (x_{k, j_1} x_{k, j_2}) \times \prod_{t=1}^{a-1} (x_{i_t, j_1} x_{i_t, j_2}). \end{aligned}$$

In particular, we note that the argument does not depend on whether Condition 2.2 or 2.2\* is specified.

B.1.5. *Proof of Lemma A.2.5 (on Page 5, Section A.2).* By Lemma A.2.4, we know the explicit form of  $D_{n,k} = \sum_{r=1}^m t_r A_{n,k,a_r}$ , and it follows that  $\pi_{n,k}^2 = \sum_{1 \leq r_1, r_2 \leq m} t_{r_1} t_{r_2} \mathbb{E}_{k-1}(A_{n,k,a_{r_1}} A_{n,k,a_{r_2}})$ . Note that by Cauchy-Schwarz inequality, for some constant  $C$ ,

$$\text{var} \left( \sum_{k=1}^n \pi_{n,k}^2 \right) \leq C n^2 \max_{1 \leq k \leq n; 1 \leq r_1, r_2 \leq m} \text{var}(\mathbb{T}_{k, a_{r_1}, a_{r_2}}),$$

where we define  $c(n, a_r) = [a_r \times \{\sigma(a_r) P_{a_r}^n\}^{-1}]^2$  and

$$\begin{aligned} \mathbb{T}_{k, a_{r_1}, a_{r_2}} &= \mathbb{E}_{k-1}(A_{n,k,a_{r_1}} A_{n,k,a_{r_2}}) \\ &= \sum_{\substack{\mathbf{i} \in \mathcal{P}(k-1, a_{r_1}-1), \\ \mathbf{\tilde{i}} \in \mathcal{P}(k-1, a_{r_2}-1)}} \sum_{\substack{1 \leq j_1 \neq j_2 \leq p, \\ 1 \leq j_3 \neq j_4 \leq p}} \{c(n, a_{r_1}) c(n, a_{r_2})\}^{1/2} \\ &\quad \times \mathbb{E} \left( \prod_{t=1}^4 x_{k, j_t} \right) \times \left( \prod_{t=1}^{a_{r_1}-1} x_{i_t, j_1} x_{i_t, j_2} \right) \times \left( \prod_{t=1}^{a_{r_2}-1} x_{\tilde{i}_t, j_3} x_{\tilde{i}_t, j_4} \right). \end{aligned}$$

Therefore to prove Lemma A.2.5, it suffices to prove  $\text{var}(\mathbb{T}_{k,a_{r_1},a_{r_2}}) = o(n^{-2})$  for every  $1 \leq k \leq n$  and  $1 \leq r_1, r_2 \leq m$ .

Without loss of generality, we prove  $\text{var}(\mathbb{T}_{k,a_1,a_2}) = o(n^{-2})$  for any fixed constants  $a_1$  and  $a_2$  and  $1 \leq k \leq n$ . Similarly to Section B.1.1, for illustration, we first consider a simple setting where  $x_{i,j}$ 's are independent in Section B.1.5.1. Next in Section B.1.5.2, we prove that under Condition 2.2,  $\text{var}(\mathbb{T}_{k,a_1,a_2}) = O(n^{-2}p^{-1} \log^3 p) = o(n^{-2})$ . Last in Section B.1.5.3, we prove that under Condition 2.2\*,  $\text{var}(\mathbb{T}_{k,a_1,a_2}) = O(n^{-2}p^{-2} + n^{-3}) = o(n^{-2})$ . Then Lemma A.2.5 is proved.

*B.1.5.1. Proof illustration.* In this section, we assume  $x_{i,j}$ 's are independent and prove  $\mathbb{T}_{k,a_1,a_2} = o(n^{-2})$ .

When  $x_{i,j}$ 's are independent, since  $j_1 \neq j_2$  and  $j_3 \neq j_4$ , we know that  $\mathbb{E}(x_{k,j_1}x_{k,j_2}x_{k,j_3}x_{k,j_4}) \neq 0$  only when  $\{j_1, j_2\} = \{j_3, j_4\}$ ; and it follows that  $\mathbb{E}(x_{k,j_1}x_{k,j_2}x_{k,j_3}x_{k,j_4}) = \mathbb{E}(x_{1,j_1}^2)\mathbb{E}(x_{1,j_2}^2)$ . Thus  $\mathbb{T}_{k,a_1,a_2} = 2c(n, a) \times T_{k,a_1,a_2}$ , where we define

$$T_{k,a_1,a_2} = \sum_{\substack{\mathbf{i} \in \mathcal{P}(k-1, a_1-1), \\ \tilde{\mathbf{i}} \in \mathcal{P}(k-1, a_2-1)}} \sum_{1 \leq j_1 \neq j_2 \leq p} \prod_{t=1}^2 \mathbb{E}(x_{1,j_t}^2) \left( \prod_{t=1}^{a_1-1} x_{i_t, j_1} x_{i_t, j_2} \right) \left( \prod_{t=1}^{a_2-1} \tilde{x}_{\tilde{i}_t, j_1} \tilde{x}_{\tilde{i}_t, j_2} \right).$$

We note that  $c(n, a)$  is of order  $\Theta(p^{-2}n^{-a})$  by Lemma A.2.1. To prove  $\text{var}(\mathbb{T}_{k,a,a}) = o(n^{-2})$ , it suffices to show that  $\text{var}(T_{k,a_1,a_2}) = o(n^{a_1+a_2-2}p^4)$ . If  $a_1 = a_2 = 1$ ,  $T_{k,a_1,a_2}$  is not random and thus  $\text{var}(T_{k,a_1,a_2}) = 0$ . It remains to consider  $a_1 \geq 1$  or  $a_2 \geq 1$  below. To examine  $\text{var}(T_{k,a_1,a_2})$ , we will first consider  $\mathbb{E}(T_{k,a_1,a_2})$  and  $\mathbb{E}(T_{k,a_1,a_2}^2)$ , then  $\text{var}(T_{k,a_1,a_2}) = \mathbb{E}(T_{k,a_1,a_2}^2) - \{\mathbb{E}(T_{k,a_1,a_2})\}^2$ .

For  $\mathbb{E}(T_{k,a_1,a_2})$ , note that  $\mathbb{E}\{(\prod_{t=1}^{a_1-1} x_{i_t, j_1} x_{i_t, j_2})(\prod_{t=1}^{a_2-1} \tilde{x}_{\tilde{i}_t, j_1} \tilde{x}_{\tilde{i}_t, j_2})\} \neq 0$  only when  $\{\mathbf{i}\} = \{\tilde{\mathbf{i}}\}$  for given  $\mathbf{i} \in \mathcal{P}(k-1, a_1-1)$  and  $\tilde{\mathbf{i}} \in \mathcal{P}(k-1, a_2-1)$ . Therefore, if  $a_1 \neq a_2$ ,  $\mathbb{E}(T_{k,a_1,a_2}) = 0$ . If  $a_1 = a_2 = a$  for some  $a$ , we have

$$(B.1.35) \quad \mathbb{E}(T_{k,a_1,a_2}) = \sum_{\substack{\mathbf{i} \in \mathcal{P}(k-1, a-1), \\ \tilde{\mathbf{i}} \in \mathcal{P}(k-1, a-1)}} \mathbf{1}_{\{\{\mathbf{i}\}=\{\tilde{\mathbf{i}}\}\}} \sum_{1 \leq j_1 \neq j_2 \leq p} \{\mathbb{E}(x_{1,j_1}^2)\mathbb{E}(x_{1,j_2}^2)\}^a,$$

where  $\mathbf{1}_{\{\{\mathbf{i}\}=\{\tilde{\mathbf{i}}\}\}}$  represents an indicator such that the two sets  $\{\mathbf{i}\} = \{\tilde{\mathbf{i}}\}$ ; and we write

$$\{\mathbb{E}(T_{k,a_1,a_2})\}^2 = \sum_{\substack{\mathbf{i}, \mathbf{m} \in \mathcal{P}(k-1, a-1), \\ \tilde{\mathbf{i}}, \tilde{\mathbf{m}} \in \mathcal{P}(k-1, a-1)}} \sum_{\substack{1 \leq j_1 \neq j_2 \leq p, \\ 1 \leq j_3 \neq j_4 \leq p}} \mathbf{1}_{\{\{\mathbf{i}\}=\{\tilde{\mathbf{i}}\}, \{\mathbf{m}\}=\{\tilde{\mathbf{m}}\}\}} \prod_{t=1}^4 \{\mathbb{E}(x_{1,j_t}^2)\}^a.$$

where  $\mathbf{1}_{\{\{\mathbf{i}\}=\{\tilde{\mathbf{i}}\}, \{\mathbf{m}\}=\{\tilde{\mathbf{m}}\}\}}$  represents an indicator such that  $\{\mathbf{i}\} = \{\tilde{\mathbf{i}}\}$  and  $\{\mathbf{m}\} = \{\tilde{\mathbf{m}}\}$  hold at the same time.

For  $E(T_{k,a_1,a_2}^2)$ , we have

$$(B.1.36) \quad E(T_{k,a_1,a_2}^2) = \sum_{\substack{\mathbf{i}, \mathbf{m} \in \mathcal{P}(k-1, a_1-1), \\ \tilde{\mathbf{i}}, \tilde{\mathbf{m}} \in \mathcal{P}(k-1, a_2-1)}} \sum_{\substack{1 \leq j_1 \neq j_2 \leq p, \\ 1 \leq j_3 \neq j_4 \leq p}} \tilde{Q}(\mathbf{i}, \tilde{\mathbf{i}}, \mathbf{m}, \tilde{\mathbf{m}}, \mathbf{j}),$$

where for the simplicity of notation, we define

$$\tilde{Q}(\mathbf{i}, \tilde{\mathbf{i}}, \mathbf{m}, \tilde{\mathbf{m}}, \mathbf{j}) = E\left(\prod_{t=1}^{a-1} x_{i_t, j_1} x_{i_t, j_2} x_{\tilde{i}_t, j_1} x_{\tilde{i}_t, j_2} x_{m_t, j_3} x_{m_t, j_4} x_{\tilde{m}_t, j_3} x_{\tilde{m}_t, j_4}\right) \prod_{t=1}^4 E(x_{1, j_t}^2).$$

We decompose  $E(T_{k,a_1,a_2}^2) = E(T_{k,a_1,a_2}^2)_{(1)} + E(T_{k,a_1,a_2}^2)_{(2)}$ , where

$$\begin{aligned} E(T_{k,a_1,a_2}^2)_{(1)} &= \sum_{\substack{\mathbf{i}, \mathbf{m} \in \mathcal{P}(k-1, a_1-1), \\ \tilde{\mathbf{i}}, \tilde{\mathbf{m}} \in \mathcal{P}(k-1, a_2-1)}} \sum_{\substack{1 \leq j_1 \neq j_2 \leq p, \\ 1 \leq j_3 \neq j_4 \leq p}} \mathbf{1}_{\left\{ \begin{array}{l} \{\mathbf{i}\}=\{\tilde{\mathbf{i}}\}, \\ \{\mathbf{m}\}=\{\tilde{\mathbf{m}}\} \end{array} \right\}} \tilde{Q}(\mathbf{i}, \tilde{\mathbf{i}}, \mathbf{m}, \tilde{\mathbf{m}}, \mathbf{j}), \\ E(T_{k,a_1,a_2}^2)_{(2)} &= \sum_{\substack{\mathbf{i}, \mathbf{m} \in \mathcal{P}(k-1, a_1-1), \\ \tilde{\mathbf{i}}, \tilde{\mathbf{m}} \in \mathcal{P}(k-1, a_2-1)}} \sum_{\substack{1 \leq j_1 \neq j_2 \leq p, \\ 1 \leq j_3 \neq j_4 \leq p}} \mathbf{1}_{\left\{ \begin{array}{l} \{\mathbf{i}\} \neq \{\tilde{\mathbf{i}}\} \text{ or } \\ \{\mathbf{m}\} \neq \{\tilde{\mathbf{m}}\} \end{array} \right\}} \tilde{Q}(\mathbf{i}, \tilde{\mathbf{i}}, \mathbf{m}, \tilde{\mathbf{m}}, \mathbf{j}), \end{aligned}$$

where the two indicators  $\mathbf{1}_{\{\{\mathbf{i}\}=\{\tilde{\mathbf{i}}\}, \{\mathbf{m}\}=\{\tilde{\mathbf{m}}\}\}}$  and  $\mathbf{1}_{\{\{\mathbf{i}\} \neq \{\tilde{\mathbf{i}}\} \text{ or } \{\mathbf{m}\} \neq \{\tilde{\mathbf{m}}\}\}}$  represent that  $\{\mathbf{i}\} = \{\tilde{\mathbf{i}}\}$  and  $\{\mathbf{m}\} = \{\tilde{\mathbf{m}}\}$  hold at the same time or not, respectively. To prove  $\text{var}(T_{k,a_1,a_2}) = o(n^{a_1+a_2-2}p^4)$ , since  $|\text{var}(T_{k,a_1,a_2})| \leq |E(T_{k,a_1,a_2}^2)_{(1)} - \{E(T_{k,a_1,a_2})\}^2| + |E(T_{k,a_1,a_2}^2)_{(2)}|$ , we show  $|E(T_{k,a_1,a_2}^2)_{(1)} - \{E(T_{k,a_1,a_2})\}^2| = o(n^{2(a-1)}p^4)$  and  $E(T_{k,a_1,a_2}^2)_{(2)} = o(n^{a_1+a_2-2}p^4)$ , respectively below.

*Part I:*  $|E(T_{k,a_1,a_2}^2)_{(1)} - \{E(T_{k,a_1,a_2})\}^2| = o(n^{a_1+a_2-2}p^4)$ . By the analysis above,  $E(T_{k,a_1,a_2}) = 0$  if  $a_1 \neq a_2$ . Also we know  $E(T_{k,a_1,a_2}^2)_{(1)} = 0$  if  $a_1 \neq a_2$ , since  $\{\mathbf{i}\} = \{\tilde{\mathbf{i}}\}$  and  $\{\mathbf{m}\} = \{\tilde{\mathbf{m}}\}$  will not happen. Thus it remains to consider  $a_1 = a_2 = a$  for some  $a$  below. By the forms of  $E(T_{k,a_1,a_2}^2)_{(1)}$  and  $\{E(T_{k,a_1,a_2})\}^2$ , we consider  $\{\mathbf{i}\} = \{\tilde{\mathbf{i}}\}$  and  $\{\mathbf{m}\} = \{\tilde{\mathbf{m}}\}$ . If  $\{\mathbf{i}\} \cap \{\mathbf{m}\} = \emptyset$ ,

$$(B.1.37) \quad \tilde{Q}(\mathbf{i}, \tilde{\mathbf{i}}, \mathbf{m}, \tilde{\mathbf{m}}, \mathbf{j}) = \prod_{t=1}^4 \{E(x_{1, j_t}^2)\}^a,$$

where we use the independence between  $x_{i,j}$ 's and  $j_1 \neq j_2$  and  $j_3 \neq j_4$ . If  $\{j_1, j_2\} \cap \{j_3, j_4\} = \emptyset$ , (B.1.37) also holds similarly by the independence between  $x_{i,j}$ 's. In summary, when  $\{\mathbf{i}\} = \{\tilde{\mathbf{i}}\}$  and  $\{\mathbf{m}\} = \{\tilde{\mathbf{m}}\}$ , we know that

$|\mathbf{E}\{\tilde{Q}(\mathbf{i}, \tilde{\mathbf{i}}, \mathbf{m}, \tilde{\mathbf{m}}, \mathbf{j})\} - \prod_{t=1}^4 \{\mathbf{E}(x_{1,j_t}^2)\}^a| = 0$ , if  $\{\mathbf{i}\} \cap \{\mathbf{m}\} = \emptyset$  or  $\{j_1, j_2\} \cap \{j_3, j_4\} = \emptyset$ . It follows that

$$\begin{aligned}
\text{(B.1.38)} \quad & |\mathbf{E}(T_{k,a_1,a_2}^2)_{(1)} - \{\mathbf{E}(T_{k,a_1,a_2})\}^2| \\
& \leq \sum_{\substack{\mathbf{i}, \mathbf{m} \in \mathcal{P}(k-1, a_1-1), \\ \tilde{\mathbf{i}}, \tilde{\mathbf{m}} \in \mathcal{P}(k-1, a_2-1)}} \sum_{\substack{1 \leq j_1 \neq j_2 \leq p, \\ 1 \leq j_3 \neq j_4 \leq p}} \mathbf{1}_{\left\{ \begin{array}{l} \{\mathbf{i}\} = \{\tilde{\mathbf{i}}\}, \{\mathbf{m}\} = \{\tilde{\mathbf{m}}\}, \{\mathbf{i}\} \cap \{\mathbf{m}\} \neq \emptyset, \\ \{j_1, j_2\} \cap \{j_3, j_4\} \neq \emptyset \end{array} \right\}} \\
& \quad \times \left| \tilde{Q}(\mathbf{i}, \tilde{\mathbf{i}}, \mathbf{m}, \tilde{\mathbf{m}}, \mathbf{j}) - \prod_{t=1}^4 \{\mathbf{E}(x_{1,j_t}^2)\}^a \right| \\
& \leq C n^{a_1+a_2-3} p^{4-1} = o(n^{a_1+a_2-2} p^4),
\end{aligned}$$

where we use the boundedness of moments in Condition 2.1 and the facts:

$$\begin{aligned}
& \sum_{\mathbf{i}, \mathbf{m} \in \mathcal{P}(k-1, a_1-1); \tilde{\mathbf{i}}, \tilde{\mathbf{m}} \in \mathcal{P}(k-1, a_2-1)} \mathbf{1}_{\{\{\mathbf{i}\} = \{\tilde{\mathbf{i}}\}, \{\mathbf{m}\} = \{\tilde{\mathbf{m}}\}, \{\mathbf{i}\} \cap \{\mathbf{m}\} \neq \emptyset\}} \leq C n^{a_1+a_2-3}, \\
& \sum_{1 \leq j_1 \neq j_2 \leq p; 1 \leq j_3 \neq j_4 \leq p} \mathbf{1}_{\{\{j_1, j_2\} \cap \{j_3, j_4\} \neq \emptyset\}} \leq C p^{4-1}.
\end{aligned}$$

*Part II:*  $\mathbf{E}(T_{k,a_1,a_2}^2)_{(2)} = o(n^{a_1+a_2-2} p^4)$ . We claim that  $\tilde{Q}(\mathbf{i}, \tilde{\mathbf{i}}, \mathbf{m}, \tilde{\mathbf{m}}, \mathbf{j}) = 0$  when  $|\{\mathbf{i}\} \cup \{\tilde{\mathbf{i}}\} \cup \{\mathbf{m}\} \cup \{\tilde{\mathbf{m}}\}| > a_1 + a_2 - 2$ , that is, one of the index only appears once in the four index sets. To see this, we assume, without loss of generality,  $i_1 \in \{\mathbf{i}\}$  but  $i_1 \notin \{\tilde{\mathbf{i}}\} \cup \{\mathbf{m}\} \cup \{\tilde{\mathbf{m}}\}$ , then

$$\text{(B.1.39)} \quad \tilde{Q}(\mathbf{i}, \tilde{\mathbf{i}}, \mathbf{m}, \tilde{\mathbf{m}}, \mathbf{j}) = \mathbf{E}(x_{i_1, j_1} x_{i_1, j_2}) \times \mathbf{E}(\text{the remaining terms}) = 0.$$

Thus when  $\tilde{Q}(\mathbf{i}, \tilde{\mathbf{i}}, \mathbf{m}, \tilde{\mathbf{m}}, \mathbf{j}) \neq 0$ , the union of the four sets satisfies

$$\text{(B.1.40)} \quad |\{\mathbf{i}\} \cup \{\tilde{\mathbf{i}}\} \cup \{\mathbf{m}\} \cup \{\tilde{\mathbf{m}}\}| \leq a_1 + a_2 - 2.$$

In addition, note that we need to consider  $\{\mathbf{i}\} \neq \{\tilde{\mathbf{i}}\}$  or  $\{\mathbf{m}\} \neq \{\tilde{\mathbf{m}}\}$  when analyzing  $\mathbf{E}(T_{k,a_1,a_2}^2)_{(2)}$ . Assume, without loss of generality, that there exists an index  $i_1 \in \{\mathbf{i}\}$  but  $i_1 \notin \{\tilde{\mathbf{i}}\}$ . Similarly to (B.1.39), we have  $\tilde{Q}(\mathbf{i}, \tilde{\mathbf{i}}, \mathbf{m}, \tilde{\mathbf{m}}, \mathbf{j}) \neq 0$  only when  $i_1 \in \{\mathbf{m}\} \cup \{\tilde{\mathbf{m}}\}$ . If  $i_1 \in \{\mathbf{m}\}$  and  $i_1 \in \{\tilde{\mathbf{m}}\}$ ,

$$\tilde{Q}(\mathbf{i}, \tilde{\mathbf{i}}, \mathbf{m}, \tilde{\mathbf{m}}, \mathbf{j}) = \mathbf{E}(x_{1, j_1} x_{1, j_3} x_{1, j_4}) \times \mathbf{E}(\text{all the remaining terms}) = 0,$$

as  $j_3 \neq j_4$  and  $x_{i,j}$ 's are independent; if  $i_1$  is only in one of  $\{\mathbf{m}\}$  and  $\{\tilde{\mathbf{m}}\}$ , for example,  $i_1 \in \{\mathbf{m}\}$  but  $i_1 \notin \{\tilde{\mathbf{m}}\}$ , then

$$\tilde{Q}(\mathbf{i}, \tilde{\mathbf{i}}, \mathbf{m}, \tilde{\mathbf{m}}, \mathbf{j}) = \mathbf{E}(x_{1, j_1} x_{1, j_3}) \times \mathbf{E}(\text{all the remaining terms}),$$



which is nonzero only when  $j_1 = j_3$ . By analyzing the indexes in  $\{\tilde{\mathbf{i}}\}$  symmetrically, we further know  $\tilde{Q}(\tilde{\mathbf{i}}, \tilde{\mathbf{i}}, \mathbf{m}, \tilde{\mathbf{m}}, \mathbf{j}) \neq 0$  only when  $\{j_1, j_2\} = \{j_3, j_4\}$ . Therefore,

$$(B.1.41) \quad |\{j_1, j_2, j_3, j_4\}| = 2.$$

Combining (B.1.40) and (B.1.41), and by the boundedness of moments in Condition 2.1, we have

$$(B.1.42) \quad |\mathbb{E}(T_{k,a_1,a_2}^2)_{(2)}| = O(n^{a_1+a_2-2}p^2).$$

In summary, combining (B.1.38) and (B.1.42), we have

$$\begin{aligned} |\text{var}(T_{k,a_1,a_2})| &= |\mathbb{E}(T_{k,a_1,a_2}^2) - \{\mathbb{E}(T_{k,a_1,a_2})\}^2| \\ &\leq |\mathbb{E}(T_{k,a_1,a_2}^2)_{(1)} - \{\mathbb{E}(T_{k,a_1,a_2})\}^2| + |\mathbb{E}(T_{k,a_1,a_2}^2)_{(2)}| \\ &= O(n^{a_1+a_2-3}p^3) + O(n^{a_1+a_2-2}p^2). \end{aligned}$$

which is  $o(n^{a_1+a_2-2}p^4)$ .

#### B.1.5.2. Proof under Condition 2.2.

*Proof idea.* Section B.1.5.1 assumes that  $x_{i,j}$ 's are independent. In this section, we further prove Lemma A.2.5 under Condition 2.2. Similarly to Section B.1.1.2, we know that under Condition 2.2,  $x_{i,j}$ 's may be no longer independent, but the dependence between  $x_{i,j_1}$  and  $x_{i,j_2}$  degenerates exponentially with their distance  $|j_1 - j_2|$ . To quantitatively examine  $|j_1 - j_2|$ , we will introduce a threshold of distance  $D_0$  to be defined in (B.1.46) below, which is similar to  $K_0$  in (B.1.9). Intuitively, when  $|j_1 - j_2| > D_0$ ,  $x_{i,j_1}$  and  $x_{i,j_2}$  are ‘‘asymptotically independent’’ with similar properties to those under the independence case in Section B.1.5.1. The following proof will provide comprehensive discussions based on  $D_0$ .

Recall that as argued at the beginning of Section B.1.5, to prove Lemma A.2.5, it suffices to show  $\text{var}(\mathbb{T}_{k,a_1,a_2}) = O(n^{-2}p^{-1}\log^3 p) = o(n^{-2})$  for any fixed integers  $a_1$  and  $a_2$ . To facilitate the discussion, we define some notation to be used in the proof.

*Notation.* For given tuples  $\mathbf{i}^{(l)} = (i_1, \dots, i_{a_l-1}) \in \mathcal{P}(k-1, a_l-1)$  with  $l = 1, 2$ , we define  $(\mathbf{i}^{(1)}, \mathbf{i}^{(2)}) = (i_1^{(1)}, \dots, i_{a_1-1}^{(1)}, i_1^{(2)}, \dots, i_{a_2-1}^{(2)})$ , and let  $S(\mathbf{i}^{(1)}, \mathbf{i}^{(2)})$  be a collection of tuples  $(\mathbf{i}^{(1)}, \mathbf{i}^{(2)})$  where  $\mathbf{i}^{(l)} \in \mathcal{P}(k-1, a_l-1)$  for  $l = 1, 2$ . Moreover, we define  $\mathcal{J} = \{(j_1, j_2) : 1 \leq j_1 \neq j_2 \leq p\}$ . Then

$$\mathbb{T}_{k,a_1,a_2} = \sum_{\substack{S(\mathbf{i}^{(1)}, \mathbf{i}^{(2)}); \\ (j_1, j_2), (j_3, j_4) \in \mathcal{J}}} \left\{ \prod_{l=1}^2 c(n, a_l) \right\}^{1/2} \times \mathbb{X}(k, \mathbf{i}^{(l)}, j_{2l-1}, j_{2l} : l = 1, 2),$$

where we recall that  $c(n, a) = [a \times \{\sigma(a)P_a^n\}^{-1}]^2$  and we define

$$\mathbb{X}(k, \mathbf{i}^{(l)}, j_{2l-1}, j_{2l} : l = 1, 2) = \mathbb{E} \left( \prod_{t=1}^4 x_{k, j_t} \right) \prod_{l=1}^2 \prod_{t=1}^{a_l-1} (x_{i_t^{(l)}, j_{2l-1}} x_{i_t^{(l)}, j_{2l}}).$$

In addition, for easy representation, we define  $a_3 = a_1$  and  $a_4 = a_2$ . Then for given tuples  $\mathbf{i}^{(l)} \in \mathcal{P}(k-1, a_l-1)$  with  $l = 1, 2, 3, 4$ , we define the tuple

$$(\mathbf{i}^{(1)}, \mathbf{i}^{(2)}, \mathbf{i}^{(3)}, \mathbf{i}^{(4)}) = (i_1^{(1)}, \dots, i_{a_1-1}^{(1)}, i_1^{(2)}, \dots, i_{a_2-1}^{(2)}, i_1^{(3)}, \dots, i_{a_1-1}^{(3)}, i_1^{(4)}, \dots, i_{a_2-1}^{(4)}),$$

and let  $S(\mathbf{i}^{(1)}, \mathbf{i}^{(2)}, \mathbf{i}^{(3)}, \mathbf{i}^{(4)})$  be a collection of  $(\mathbf{i}^{(1)}, \mathbf{i}^{(2)}, \mathbf{i}^{(3)}, \mathbf{i}^{(4)})$  where  $\mathbf{i}^{(l)} \in \mathcal{P}(k-1, a_l-1)$  with  $l = 1, 2, 3, 4$ . Then we can write

$$\mathbb{T}_{k, a_1, a_2}^2 = \sum_{\substack{S(\mathbf{i}^{(1)}, \mathbf{i}^{(2)}, \mathbf{i}^{(3)}, \mathbf{i}^{(4)}); \\ (j_1, j_2), (j_3, j_4), (j_5, j_6), (j_7, j_8) \in \mathcal{J}}} \prod_{l=1}^2 c(n, a_l) \mathbb{X}(k, \mathbf{i}^{(l)}, j_{2l-1}, j_{2l} : l = 1, 2, 3, 4),$$

where we define

$$\begin{aligned} & \mathbb{X}(k, \mathbf{i}^{(l)}, j_{2l-1}, j_{2l} : l = 1, 2, 3, 4) \\ &= \mathbb{E} \left( \prod_{t=1}^4 x_{k, j_t} \right) \mathbb{E} \left( \prod_{t=5}^8 x_{k, j_t} \right) \prod_{l=1}^4 \prod_{t=1}^{a_l-1} x_{i_t^{(l)}, j_{2l-1}} x_{i_t^{(l)}, j_{2l}}. \end{aligned}$$

Recall the definitions at the beginning of Section B.  $\{\mathbf{i}^{(1)}\} = \{\mathbf{i}^{(2)}\}$  represents that the two tuples have the same elements without order. We next decompose  $S(\mathbf{i}^{(1)}, \mathbf{i}^{(2)})$  into two parts: the collection  $S(\mathbf{i}^{(1)}, \mathbf{i}^{(2)}, 1)$  contains the tuples  $(\mathbf{i}^{(1)}, \mathbf{i}^{(2)})$  satisfying  $\{\mathbf{i}^{(1)}\} \neq \{\mathbf{i}^{(2)}\}$ , and the collection  $S(\mathbf{i}^{(1)}, \mathbf{i}^{(2)}, 2)$  contains the tuples  $(\mathbf{i}^{(1)}, \mathbf{i}^{(2)})$  satisfying  $\{\mathbf{i}^{(1)}\} = \{\mathbf{i}^{(2)}\}$ . Then we can write  $\mathbb{T}_{k, a_1, a_2} = \sum_{v=1}^2 \mathbb{T}_{k, a_1, a_2, v}$ , where

$$\mathbb{T}_{k, a_1, a_2, v} = \sum_{\substack{S(\mathbf{i}^{(1)}, \mathbf{i}^{(2)}, v); \\ (j_1, j_2), (j_3, j_4) \in \mathcal{J}}} \left\{ \prod_{l=1}^2 c(n, a_l) \right\}^{1/2} \times \mathbb{X}(k, \mathbf{i}^{(l)}, j_{2l-1}, j_{2l} : l = 1, 2).$$

In addition, for  $v = 1, 2$ , we let the collection  $S(\mathbf{i}^{(1)}, \mathbf{i}^{(2)}, \mathbf{i}^{(3)}, \mathbf{i}^{(4)}, v, v)$  contain the tuples  $(\mathbf{i}^{(1)}, \mathbf{i}^{(2)}, \mathbf{i}^{(3)}, \mathbf{i}^{(4)})$  such that  $(\mathbf{i}^{(1)}, \mathbf{i}^{(2)}) \in S(\mathbf{i}^{(1)}, \mathbf{i}^{(2)}, v)$  and  $(\mathbf{i}^{(3)}, \mathbf{i}^{(4)}) \in S(\mathbf{i}^{(3)}, \mathbf{i}^{(4)}, v)$ . It follows that for  $v = 1, 2$ , we can write

$$\begin{aligned} \text{(B.1.43)} \quad \mathbb{T}_{k, a_1, a_2, v}^2 &= \sum_{\substack{S(\mathbf{i}^{(1)}, \mathbf{i}^{(2)}, \mathbf{i}^{(3)}, \mathbf{i}^{(4)}, v, v); \\ (j_1, j_2), (j_3, j_4), (j_5, j_6), (j_7, j_8) \in \mathcal{J}}} \prod_{l=1}^2 c(n, a_l) \\ &\quad \times \mathbb{X}(k, \mathbf{i}^{(l)}, j_{2l-1}, j_{2l} : l = 1, 2, 3, 4). \end{aligned}$$

We next define some notation on the  $j$  indexes. Given a tuple  $(j_{t_1}, j_{t_2}, j_{t_3}, j_{t_4})$ , we write its corresponding ordered version as

$$(B.1.44) \quad (\tilde{j}_{t_1}, \tilde{j}_{t_2}, \tilde{j}_{t_3}, \tilde{j}_{t_4}) \quad \text{satisfying} \quad \tilde{j}_{t_1} \leq \tilde{j}_{t_2} \leq \tilde{j}_{t_3} \leq \tilde{j}_{t_4}.$$

Given the ordered indexes, we define the maximum distance between indexes in the given tuple as  $\mathbb{D}_M(j_{t_1}, j_{t_2}, j_{t_3}, j_{t_4}) = \max\{\tilde{j}_{t_2} - \tilde{j}_{t_1}, \tilde{j}_{t_3} - \tilde{j}_{t_2}, \tilde{j}_{t_4} - \tilde{j}_{t_3}\}$ . For the simplicity of presentation later, for tuples  $(j_1, j_2), (j_3, j_4), (j_5, j_6), (j_7, j_8) \in \mathcal{J}$ , we further define

$$(B.1.45) \quad \begin{aligned} \kappa_1 &= \mathbb{D}_M(j_1, j_2, j_3, j_4), & \kappa_2 &= \mathbb{D}_M(j_5, j_6, j_7, j_8), \\ \kappa_3 &= \mathbb{D}_M(j_1, j_2, j_5, j_6) & \kappa_4 &= \mathbb{D}_M(j_1, j_2, j_7, j_8). \end{aligned}$$

In the following discussion, to quantitatively evaluate the distances in (B.1.45), we introduce a threshold  $D_0$  below. In particular, given small positive constants  $\mu$  and  $\epsilon$ , and  $\delta$  in Condition 2.2, we define

$$(B.1.46) \quad D_0 = \frac{-(2 + \epsilon)(8 + \mu) \log p}{\epsilon \log \delta},$$

which will be used as discussed at the beginning of this section on Page 57.

*Proof.* We present the proof of  $\text{var}(\mathbb{T}_{k, a_1, a_2}) = O(n^{-2} p^{-1} \log^3 p)$  based on the notation above. Note that we can write  $\mathbb{T}_{k, a_1, a_2} = \sum_{v=1}^2 \mathbb{T}_{k, a_1, a_2, v}$ . By the Cauchy-Schwarz inequality, we know it suffices to show  $\text{var}(\mathbb{T}_{k, a_1, a_2, v}) = O(n^{-2} p^{-1} \log^3 p)$  for  $v = 1, 2$  respectively.

*Step I:*  $\text{var}(\mathbb{T}_{k, a_1, a_2, 1}) = O(n^{-2} p^{-1} \log^3 p)$ . By the definition of  $\mathbb{T}_{k, a_1, a_2, 1}$ , we have  $\{\mathbf{i}^{(1)}\} \neq \{\mathbf{i}^{(2)}\}$  for  $(\mathbf{i}^{(1)}, \mathbf{i}^{(2)}) \in S(\mathbf{i}^{(1)}, \mathbf{i}^{(2)}, 1)$ . Suppose, without loss of generality, that index  $i \in \{\mathbf{i}^{(1)}\}$  but  $i \notin \{\mathbf{i}^{(2)}\}$ . Then under  $H_0$ ,

$$(B.1.47) \quad \begin{aligned} & \mathbb{E}\{\mathbb{X}(k, \mathbf{i}^{(l)}, j_{2l-1}, j_{2l} : l = 1, 2, 3, 4)\} \\ &= \mathbb{E}(x_{i, j_1} x_{i, j_2}) \times \mathbb{E}(\text{other terms}) = 0. \end{aligned}$$

Therefore  $\mathbb{E}(\mathbb{T}_{k, a_1, a_2, 1}) = 0$  and  $\text{var}(\mathbb{T}_{k, a_1, a_2, 1}) = \mathbb{E}(\mathbb{T}_{k, a_1, a_2, 1}^2)$ .

By (B.1.43), we have

$$\begin{aligned} \mathbb{T}_{k, a_1, a_2, 1}^2 &= \sum_{\substack{S(\mathbf{i}^{(1)}, \mathbf{i}^{(2)}, \mathbf{i}^{(3)}, \mathbf{i}^{(4)}, 1, 1); \\ (j_1, j_2), (j_3, j_4), (j_5, j_6), (j_7, j_8) \in \mathcal{J}}} \prod_{l=1}^2 c(n, a_l) \\ &\quad \times \mathbb{X}(k, \mathbf{i}^{(l)}, j_{2l-1}, j_{2l} : l = 1, 2, 3, 4). \end{aligned}$$

To prove  $\text{var}(\mathbb{T}_{k,a_1,a_2,1}) = O(n^{-2}p^{-1}\log^3 p)$ , we will next show that for given  $(j_1, j_2), (j_3, j_4), (j_5, j_6), (j_7, j_8) \in \mathcal{J}$ ,

$$(B.1.48) \quad \mathbb{E}\left\{ \sum_{S(\mathbf{i}^{(1)}, \mathbf{i}^{(2)}, \mathbf{i}^{(3)}, \mathbf{i}^{(4)}, 1, 1)} \mathbb{X}(k, \mathbf{i}^{(l)}, j_{2l-1}, j_{2l} : l = 1, 2, 3, 4) \right\} = O(n^{a_1+a_2-2});$$

and for given  $(\mathbf{i}^{(1)}, \mathbf{i}^{(2)}, \mathbf{i}^{(3)}, \mathbf{i}^{(4)}) \in S(\mathbf{i}^{(1)}, \mathbf{i}^{(2)}, \mathbf{i}^{(3)}, \mathbf{i}^{(4)}, 1, 1)$ ,

$$(B.1.49) \quad \mathbb{E}\left\{ \sum_{\substack{(j_1, j_2), (j_3, j_4), \\ (j_5, j_6), (j_7, j_8) \in \mathcal{J}}} \mathbb{X}(k, \mathbf{i}^{(l)}, j_{2l-1}, j_{2l} : l = 1, 2, 3, 4) \right\} = O(p^3 \log^3 p).$$

Given (B.1.48) and (B.1.49), since  $c(n, a_l) = \Theta(p^{-2}n^{-a_l})$ , we can obtain  $\mathbb{E}(\mathbb{T}_{k,a_1,a_2,1}^2) = O(n^{-2}p^{-1}\log^3 p)$ . Thus to finish the proof, it remains to prove (B.1.48) and (B.1.49).

To prove (B.1.48), we claim that  $\mathbb{E}\{\mathbb{X}(k, \mathbf{i}^{(l)}, j_{2l-1}, j_{2l} : l = 1, 2, 3, 4)\} = 0$  when  $|\cup_{l=1}^4 \{\mathbf{i}^{(l)}\}| > a_1 + a_2 - 2$ , i.e., there exists one index only appears once in the four index sets  $\{\mathbf{i}^{(l)}\}$ ,  $l = 1, \dots, 4$ . To see this, suppose an index  $i \in \{\mathbf{i}^{(1)}\}$  but  $i \notin \{\mathbf{i}^{(2)}\}$ ,  $i \notin \{\mathbf{i}^{(3)}\}$  and  $i \notin \{\mathbf{i}^{(4)}\}$ , then (B.1.47) holds. Therefore,  $\mathbb{E}\{\mathbb{X}(k, \mathbf{i}^{(l)}, j_{2l-1}, j_{2l} : l = 1, 2, 3, 4)\} \neq 0$  only when

$$(B.1.50) \quad \left| \cup_{l=1}^4 \{\mathbf{i}^{(l)}\} \right| \leq a_1 + a_2 - 2.$$

By the boundedness of moments from Condition 2.1, we know (B.1.48) holds.

We next prove (B.1.49). For  $(\mathbf{i}^{(1)}, \mathbf{i}^{(2)}, \mathbf{i}^{(3)}, \mathbf{i}^{(4)}) \in S(\mathbf{i}^{(1)}, \mathbf{i}^{(2)}, \mathbf{i}^{(3)}, \mathbf{i}^{(4)}, 1, 1)$ , we know  $\{\mathbf{i}^{(1)}\} \neq \{\mathbf{i}^{(2)}\}$  and  $\{\mathbf{i}^{(3)}\} \neq \{\mathbf{i}^{(4)}\}$ . Suppose, without loss of generality, there exists an index  $i \in \{\mathbf{i}^{(3)}\}$  and  $i \notin \{\mathbf{i}^{(4)}\}$ . If  $i \notin \{\mathbf{i}^{(1)}\}$  and  $i \notin \{\mathbf{i}^{(2)}\}$ , similarly, (B.1.47) holds. Then we consider  $i \in \{\mathbf{i}^{(1)}\}$  or  $i \in \{\mathbf{i}^{(2)}\}$  in the following three cases.

**Case 1:** When  $i \in \{\mathbf{i}^{(1)}\}$  and  $i \notin \{\mathbf{i}^{(2)}\}$ , we know

$$(B.1.51) \quad \mathbb{E}\left\{ \mathbb{X}(k, \mathbf{i}^{(l)}, j_{2l-1}, j_{2l} : l = 1, 2, 3, 4) \right\} \\ = \mathbb{E}\left( \prod_{t=1}^4 x_{k,j_t} \right) \times \mathbb{E}\left( \prod_{t=5}^8 x_{k,j_t} \right) \times \mathbb{E}\left( \prod_{t=1,2,5,6} x_{i,j_t} \right) \times \mathbb{E}(\text{other terms}).$$

If  $x_{i,j}$ 's are independent as in Section B.1.5.1, we know (B.1.51)  $\neq 0$  only when  $\{j_1, j_2\} = \{j_3, j_4\} = \{j_5, j_6\} = \{j_7, j_8\}$ , which induces  $|\{j_1, \dots, j_8\}| = 2$  and  $\sum_{(j_1, j_2), (j_3, j_4), (j_5, j_6), (j_7, j_8) \in \mathcal{J}} \mathbb{E}\{\mathbb{X}(k, \mathbf{i}^{(l)}, j_{2l-1}, j_{2l} : l = 1, 2, 3, 4)\} = O(p^2)$ , i.e., (B.1.49) is obtained. Under Condition 2.2,  $x_{i,j}$ 's may be no longer

independent, but as discussed at the beginning of Section B.1.5.2, we can still prove (B.1.49) similarly to the independence case. In particular, based on  $D_0$  in (B.1.46), we evaluate (B.1.51) by discussing the following three sub-cases (a)–(c).

- (a) When both  $(j_1, j_2, j_3, j_4)$  and  $(j_5, j_6, j_7, j_8)$  contain only two distinct indexes within each tuple, i.e.,  $|\{j_1, j_2, j_3, j_4\}| = |\{j_5, j_6, j_7, j_8\}| = 2$ , we consider without loss of generality that  $j_1 = j_3$ ,  $j_2 = j_4$ ,  $j_5 = j_7$ , and  $j_6 = j_8$ . Then

$$(B.1.51) = \mathbb{E}(x_{k,j_1}^2 x_{k,j_2}^2) \mathbb{E}(x_{k,j_5}^2 x_{k,j_6}^2) \mathbb{E}(x_{k,j_1} x_{k,j_2} x_{k,j_5} x_{k,j_6}) \mathbb{E}(\text{other terms}).$$

(a.1) If  $(j_1, j_2, j_5, j_6)$  contains two distinct indexes, i.e.,  $|\{j_1, j_2, j_5, j_6\}| = 2$ , we assume without loss of generality that  $j_1 = j_5$  and  $j_2 = j_6$ . Then  $|\{j_1, \dots, j_8\}| = 2$  and in this case, the total number of distinct  $j$  indexes is  $O(p^2)$ .

(a.2) If  $(j_1, j_2, j_5, j_6)$  contains at least three distinct indexes, that is,  $|\{j_1, j_2, j_5, j_6\}| \geq 3$ , we have  $|\{\tilde{j}_1, \tilde{j}_2, \tilde{j}_5, \tilde{j}_6\}| \geq 3$ , where  $(\tilde{j}_1, \tilde{j}_2, \tilde{j}_5, \tilde{j}_6)$  denotes the ordered version of  $(j_1, j_2, j_5, j_6)$  following the notation in (B.1.44). Then we have  $\mathbb{E}(x_{k,\tilde{j}_1} x_{k,\tilde{j}_2}) \mathbb{E}(x_{k,\tilde{j}_5} x_{k,\tilde{j}_6}) = 0$ . Together with  $\mathbb{E}(\mathbf{x}) = \mathbf{0}$ , we can write

$$(B.1.52) \quad \begin{aligned} |\mathbb{E}(x_{1,j_1} x_{1,j_2} x_{1,j_5} x_{1,j_6})| &= |\text{cov}(x_{k,\tilde{j}_1} x_{k,\tilde{j}_2}, x_{k,\tilde{j}_5} x_{k,\tilde{j}_6})| \\ &= |\text{cov}(x_{k,\tilde{j}_1}, x_{k,\tilde{j}_2} x_{k,\tilde{j}_5} x_{k,\tilde{j}_6})| \\ &= |\text{cov}(x_{k,\tilde{j}_1} x_{k,\tilde{j}_2} x_{k,\tilde{j}_5}, x_{k,\tilde{j}_6})|. \end{aligned}$$

Recall that  $\kappa_3$  in (B.1.45) represents the maximum distance between  $(j_1, j_2, j_5, j_6)$ . If  $\kappa_3 > D_0$ , by Conditions 2.1 and 2.2, and the  $\alpha$ -mixing inequality in Lemma B.0.1, we know

$$|(B.1.51)| \leq C \times (B.1.52) \leq C \delta^{\frac{D_0 \epsilon}{2+\epsilon}} = O(p^{-(8+\mu)}).$$

If  $\kappa_3 \leq D_0$ , the total number of distinct  $j$  indexes is  $O(pD_0^3)$ .

- (b) When both  $(j_1, j_2, j_3, j_4)$  and  $(j_5, j_6, j_7, j_8)$  have at least 3 distinct elements, i.e.,  $|\{j_1, j_2, j_3, j_4\}| \geq 3$  and  $|\{j_5, j_6, j_7, j_8\}| \geq 3$ , following the notation in (B.1.44), similarly to (B.1.52), we can write

$$(B.1.53) \quad \begin{aligned} |\mathbb{E}(x_{k,j_1} x_{k,j_2} x_{k,j_3} x_{k,j_4})| &= |\text{cov}(x_{k,\tilde{j}_1} x_{k,\tilde{j}_2}, x_{k,\tilde{j}_3} x_{k,\tilde{j}_4})| \\ &= |\text{cov}(x_{k,\tilde{j}_1}, x_{k,\tilde{j}_2} x_{k,\tilde{j}_3} x_{k,\tilde{j}_4})| \\ &= |\text{cov}(x_{k,\tilde{j}_1} x_{k,\tilde{j}_2} x_{k,\tilde{j}_3}, x_{k,\tilde{j}_4})|, \end{aligned}$$

and

$$\begin{aligned}
\text{(B.1.54)} \quad |\mathbb{E}(x_{k,j_5}x_{k,j_6}x_{k,j_7}x_{k,j_8})| &= |\text{cov}(x_{k,\tilde{j}_5}x_{k,\tilde{j}_6}, x_{k,\tilde{j}_7}x_{k,\tilde{j}_8})| \\
&= |\text{cov}(x_{k,\tilde{j}_5}, x_{k,\tilde{j}_6}x_{k,\tilde{j}_7}x_{k,\tilde{j}_8})| \\
&= |\text{cov}(x_{k,\tilde{j}_5}x_{k,\tilde{j}_6}x_{k,\tilde{j}_7}, x_{k,\tilde{j}_8})|.
\end{aligned}$$

When  $\max\{\kappa_1, \kappa_2\} > D_0$  in this case, by Conditions 2.1 and 2.2, and the  $\alpha$ -mixing inequality,

$$\text{(B.1.55)} \quad |(\text{B.1.51})| \leq C \times (\text{B.1.53}) \times (\text{B.1.54}) \leq C\delta^{\frac{D_0\epsilon}{2+\epsilon}} = O(p^{-(8+\mu)}).$$

When  $\max\{\kappa_1, \kappa_2\} \leq D_0$ , by the definitions in (B.1.45), we know under this case, the indexes in  $(j_1, j_2, j_3, j_4)$  are close to each other within the distance  $D_0$ , and the indexes in  $(j_5, j_6, j_7, j_8)$  are also close to each other within the distance  $D_0$ . Then the total number of distinct indexes is  $O(pD_0^3 \times pD_0^3) = O(p^2D_0^6)$ .

- (c) If only one of  $(j_1, j_2, j_3, j_4)$  and  $(j_5, j_6, j_7, j_8)$  contains at least 3 distinct indexes, without loss of generality, we assume  $|\{j_1, j_2, j_3, j_4\}| \geq 3$  and  $|\{j_5, j_6, j_7, j_8\}| = 2$ . When  $\kappa_1 \leq D_0$ , the indexes in  $(j_1, j_2, j_3, j_4)$  are close within distance  $D_0$ . As  $(j_5, j_6, j_7, j_8)$  only contains 2 distinct indexes, the total number of distinct  $j$  indexes is  $O(p^3D_0^3)$ . When  $\kappa_1 > D_0$ , by Conditions 2.1 and 2.2, and the  $\alpha$ -mixing inequality, we know

$$\text{(B.1.56)} \quad |(\text{B.1.51})| \leq C \times (\text{B.1.53}) \leq C\delta^{\frac{D_0\epsilon}{2+\epsilon}} = O(p^{-(8+\mu)}).$$

**Case 2:** When  $i \notin \{\mathbf{i}^{(1)}\}$  and  $i \in \{\mathbf{i}^{(2)}\}$ , we know similar conclusion holds by symmetricity.

**Case 3:** When  $i \in \{\mathbf{i}^{(1)}\}$  and  $i \in \{\mathbf{i}^{(2)}\}$ , we have

$$\begin{aligned}
\text{(B.1.57)} \quad &\mathbb{E}\left\{\mathbb{X}(k, \mathbf{i}^{(l)}, j_{2l-1}, j_{2l} : l = 1, 2, 3, 4)\right\} \\
&= \mathbb{E}\left(\prod_{t=1}^4 x_{k,j_t}\right) \times \mathbb{E}\left(\prod_{t=5}^8 x_{k,j_t}\right) \times \mathbb{E}\left(\prod_{t=1}^6 x_{k,j_t}\right) \times \mathbb{E}(\text{other terms})
\end{aligned}$$

Similarly to **Case 1** above, to evaluate (B.1.57), we next discuss two sub-cases with  $D_0$  in (B.1.46).

- (a) When both  $(j_1, j_2, j_3, j_4)$  and  $(j_5, j_6, j_7, j_8)$  only contain 2 distinct indexes within each tuple, i.e.,  $|\{j_1, j_2, j_3, j_4\}| = |\{j_5, j_6, j_7, j_8\}| = 2$ , we assume  $j_1 = j_3, j_2 = j_4, j_5 = j_7$  and  $j_6 = j_8$  without loss of generality. Then

$$\text{(B.1.57)} = \mathbb{E}(x_{k,j_1}^2 x_{k,j_2}^2) \mathbb{E}(x_{k,j_5}^2 x_{k,j_6}^2) \mathbb{E}(x_{i,j_1}^2 x_{i,j_2}^2 x_{i,j_5} x_{i,j_6}) \mathbb{E}(\text{other terms}).$$

Following the notation in (B.1.44), when  $\tilde{k}_3^* := \min\{\tilde{j}_2 - \tilde{j}_1, \tilde{j}_5 - \tilde{j}_2, \tilde{j}_6 - \tilde{j}_5\} < D_0$ , the total number of distinct  $j$  indexes is  $O(p^3 D_0)$ . When  $\tilde{k}_3^* > D_0$ , by Conditions 2.1, 2.2, and the  $\alpha$ -mixing inequality,

$$\begin{aligned} & |\mathbb{E}(x_{1,\tilde{j}_1}^2 x_{1,\tilde{j}_2}^2 x_{1,\tilde{j}_5} x_{1,\tilde{j}_6})| \\ &= |\text{cov}(x_{1,\tilde{j}_1}^2, x_{1,\tilde{j}_2}^2 x_{1,\tilde{j}_5} x_{1,\tilde{j}_6}) + \mathbb{E}(x_{1,\tilde{j}_1}^2) \text{cov}(x_{1,\tilde{j}_2}^2, x_{1,\tilde{j}_5} x_{1,\tilde{j}_6}) \\ &\quad + [\mathbb{E}(x_{1,\tilde{j}_1}^2)]^2 \text{cov}(x_{1,\tilde{j}_5}, x_{1,\tilde{j}_6})| \\ &\leq C \delta^{\frac{D_0 \epsilon}{2+\epsilon}} = O(p^{-(8+\mu)}). \end{aligned}$$

- (b) If at least one of  $(j_1, j_2, j_3, j_4)$  and  $(j_5, j_6, j_7, j_8)$  has at least 3 distinct indexes within the tuple, it means that  $|\{j_1, j_2, j_3, j_4\}| \geq 3$  or  $|\{j_5, j_6, j_7, j_8\}| \geq 3$ . Similarly to (B.1.55) and (B.1.56), we know that when  $\max\{\kappa_1, \kappa_2\} > D_0$ ,  $|\text{(B.1.57)}| = O(p^{-(8+\mu)})$ ; when  $\max\{\kappa_1, \kappa_2\} \leq D_0$ , the total number of distinct  $j$  indexes is  $O(p^3 D_0^3)$ .

Combining Cases 1–3 discussed above, we obtain

$$\begin{aligned} & \mathbb{E}\left\{ \sum_{\substack{(j_1, j_2), (j_3, j_4), \\ (j_5, j_6), (j_7, j_8) \in \mathcal{J}}} \mathbb{X}(k, \mathbf{i}^{(l)}, j_{2l-1}, j_{2l} : l = 1, 2, 3, 4) \right\} \\ &= O(p^3 D_0^3) + \sum_{(j_1, j_2), (j_3, j_4), (j_5, j_6), (j_7, j_8) \in \mathcal{J}} O(p^{-(8+\mu)}) \\ &= O(p^3 \log^3 p) + p^8 O(p^{-(8+\mu)}) = O(p^3 \log^3 p), \end{aligned}$$

where we use  $\mu > 0$  and  $D_0 = O(\log p)$  by (B.1.46). Thus (B.1.49) is proved.

*Step II:*  $\text{var}(\mathbb{T}_{k, a_1, a_2, 2}) = O(n^{-2} p^{-1} \log^3 p)$ . Recall that  $\mathbb{T}_{k, a_1, a_2, 2}$  is constructed from  $(\mathbf{i}^{(1)}, \mathbf{i}^{(2)}) \in S(\mathbf{i}^{(1)}, \mathbf{i}^{(2)}, 2)$ , where  $\{\mathbf{i}^{(1)}\} = \{\mathbf{i}^{(2)}\}$ . As  $\{\mathbf{i}^{(1)}\} = \{\mathbf{i}^{(2)}\}$  happens only when  $a_1 = a_2$ , so it remains to consider  $a_1 = a_2 = a$  for some integer  $a$  below. It follows that  $\mathbb{E}\{\mathbb{X}(k, \mathbf{i}^{(l)}, j_{2l-1}, j_{2l} : l = 1, 2)\} = \{\mathbb{E}(\prod_{t=1}^4 x_{1, j_t})\}^a$ , and then

$$\mathbb{E}(\mathbb{T}_{k, a_1, a_2, 2}) = \sum_{\substack{S(\mathbf{i}^{(1)}, \mathbf{i}^{(2)}, 2); \\ (j_1, j_2), (j_3, j_4) \in \mathcal{J}}} \left\{ \prod_{l=1}^2 c(n, a_l) \right\}^{1/2} \times \left\{ \mathbb{E} \left( \prod_{t=1}^4 x_{1, j_t} \right) \right\}^a,$$

and

$$\{\mathbb{E}(\mathbb{T}_{k, a_1, a_2, 2})\}^2 = \sum_{\substack{S(\mathbf{i}^{(1)}, \mathbf{i}^{(2)}, \mathbf{i}^{(3)}, \mathbf{i}^{(4)}, 2, 2); \\ (j_1, j_2), (j_3, j_4), (j_5, j_6), (j_7, j_8) \in \mathcal{J}}} \prod_{l=1}^2 c(n, a_l) \left\{ \mathbb{E} \left( \prod_{t=1}^4 x_{1, j_t} \right) \mathbb{E} \left( \prod_{t=5}^8 x_{1, j_t} \right) \right\}^a.$$

Moreover, by (B.1.43), we know  $\mathbb{T}_{k,a_1,a_2,2}^2$  is a summation over  $(\mathbf{i}^{(1)}, \mathbf{i}^{(2)}, \mathbf{i}^{(3)}, \mathbf{i}^{(4)}) \in S(\mathbf{i}^{(1)}, \mathbf{i}^{(2)}, \mathbf{i}^{(3)}, \mathbf{i}^{(4)}, 2, 2)$ , where  $\{\mathbf{i}^{(1)}\} = \{\mathbf{i}^{(2)}\}$  and  $\{\mathbf{i}^{(3)}\} = \{\mathbf{i}^{(4)}\}$  by the construction. We further define  $S(\mathbf{i}^{(1)}, \mathbf{i}^{(2)}, \mathbf{i}^{(3)}, \mathbf{i}^{(4)}, 2, 2, q)$  to be the collection of tuples  $(\mathbf{i}^{(1)}, \mathbf{i}^{(2)}, \mathbf{i}^{(3)}, \mathbf{i}^{(4)})$  such that  $|\{\mathbf{i}^{(1)}\} \cap \{\mathbf{i}^{(3)}\}| = q$ , where  $0 \leq q \leq a-1$ . Then we write  $\mathbb{T}_{k,a_1,a_2,2}^2 = \sum_{q=0}^{a-1} \mathbb{T}_{k,a_1,a_2,2,(q)}^2$ , where we define

$$\begin{aligned} \mathbb{T}_{k,a_1,a_2,2,(q)}^2 &= \sum_{\substack{S(\mathbf{i}^{(1)}, \mathbf{i}^{(2)}, \mathbf{i}^{(3)}, \mathbf{i}^{(4)}, 2, 2, q); \\ (j_1, j_2), (j_3, j_4), (j_5, j_6), (j_7, j_8) \in \mathcal{J}}} \prod_{l=1}^2 c(n, a_l) \\ &\quad \times \mathbb{X}(k, \mathbf{i}^{(l)}, j_{2l-1}, j_{2l} : l = 1, 2, 3, 4). \end{aligned}$$

In particular, when  $|\{\mathbf{i}^{(1)}\} \cap \{\mathbf{i}^{(3)}\}| = q$ ,

$$\mathbb{E}\left\{\mathbb{X}(k, \mathbf{i}^{(l)}, j_{2l-1}, j_{2l} : l = 1, 2, 3, 4)\right\} = \left\{\mathbb{E}\left(\prod_{t=1}^4 x_{1,j_t}\right)\mathbb{E}\left(\prod_{t=5}^8 x_{1,j_t}\right)\right\}^{a-q} \left\{\prod_{t=1}^8 x_{1,j_t}\right\}^q.$$

Therefore, for  $a_1 = a_2 = a$ ,

$$\begin{aligned} \text{var}(\mathbb{T}_{k,a_1,a_2,2}) &= \mathbb{E}(\mathbb{T}_{k,a_1,a_2,2}^2) - \{\mathbb{E}(\mathbb{T}_{k,a_1,a_2,2})\}^2 \\ &= \sum_{q=0}^{a-1} \mathbb{E}(\mathbb{T}_{k,a_1,a_2,2,(q)}^2) - \{\mathbb{E}(\mathbb{T}_{k,a_1,a_2,2})\}^2 \\ &= \sum_{q=1}^{a-1} \sum_{S(\mathbf{i}^{(1)}, \mathbf{i}^{(2)}, \mathbf{i}^{(3)}, \mathbf{i}^{(4)}, 2, 2, q)} \prod_{l=1}^2 c(n, a_l) \times \mathbb{D}_{k,a,a,2,q}, \end{aligned}$$

where we define

$$\begin{aligned} \mathbb{D}_{k,a,a,2,q} &= \sum_{\substack{(j_1, j_2), (j_3, j_4), \\ (j_5, j_6), (j_7, j_8) \in \mathcal{J}}} \left\{\mathbb{E}\left(\prod_{t=1}^4 x_{1,j_t}\right)\mathbb{E}\left(\prod_{t=5}^8 x_{1,j_t}\right)\right\}^{a-q} \\ &\quad \times \left[ \left\{\mathbb{E}\left(\prod_{t=1}^8 x_{1,j_t}\right)\right\}^q - \left\{\mathbb{E}\left(\prod_{t=1}^4 x_{1,j_t}\right)\mathbb{E}\left(\prod_{t=5}^8 x_{1,j_t}\right)\right\}^q \right], \end{aligned}$$

and use  $\mathbb{D}_{k,a,a,2,q} = 0$  when  $q = 0$ . By the construction, we know the total number of tuples in the collection  $S(\mathbf{i}^{(1)}, \mathbf{i}^{(2)}, \mathbf{i}^{(3)}, \mathbf{i}^{(4)}, 2, 2, q)$  is bounded by  $Cn^{2(a-1)-q}$ , that is, for some constant  $C$ ,

$$(B.1.58) \quad \sum_{S(\mathbf{i}^{(1)}, \mathbf{i}^{(2)}, \mathbf{i}^{(3)}, \mathbf{i}^{(4)}, 2, 2, q)} 1 \leq Cn^{2(a-1)-q}.$$



Since  $c(n, a) = \Theta(p^{-2}n^{-a})$ , to prove  $\text{var}(\mathbb{T}_{k,a_1,a_2,2}^2) = O(n^{-2}p^{-1}\log^3 p)$ , it suffices to show for given tuple  $(\mathbf{i}^{(1)}, \mathbf{i}^{(2)}, \mathbf{i}^{(3)}, \mathbf{i}^{(4)})$ ,  $\mathbb{D}_{k,a_1,a_2,2,q} = O(p^3 \log^3 p)$  for  $1 \leq q \leq a-1$ .

By Condition 2.1 and Lemma B.0.2 (on Page 36), for  $1 \leq q \leq a-1$ ,

$$\begin{aligned} |\mathbb{D}_{k,a,a,2,q}| &\leq C \sum_{\substack{(j_1, j_2), (j_3, j_4), \\ (j_5, j_6), (j_7, j_8) \in \mathcal{J}}} \left| \mathbb{E} \left( \prod_{t=1}^4 x_{1, j_t} \right) \right| \times \left| \mathbb{E} \left( \prod_{t=5}^8 x_{1, j_t} \right) \right| \\ &\quad \times \left| \mathbb{E} \left( \prod_{t=1}^4 x_{1, j_t} \right) \times \mathbb{E} \left( \prod_{t=5}^8 x_{1, j_t} \right) - \mathbb{E} \left( \prod_{t=1}^8 x_{1, j_t} \right) \right|. \end{aligned}$$

To evaluate  $\mathbb{D}_{k,a,a,2,q}$ , we next discuss several cases, based on the notation  $\kappa_1, \dots, \kappa_4$  in (B.1.45), and  $D_0$  in (B.1.46).

- (a) When both tuples  $(j_1, j_2, j_3, j_4)$  and  $(j_5, j_6, j_7, j_8)$  contain only two distinct indexes, i.e.,  $|\{j_1, j_2, j_3, j_4\}| = |\{j_5, j_6, j_7, j_8\}| = 2$ , we assume without loss of generality that  $j_1 = j_3, j_2 = j_4, j_5 = j_7$  and  $j_6 = j_8$ . Then  $\mathbb{E}(\prod_{t=1}^4 x_{1, j_t}) = \mathbb{E}(x_{1, j_1}^2 x_{1, j_2}^2)$ ,  $\mathbb{E}(\prod_{t=5}^8 x_{1, j_t}) = \mathbb{E}(x_{1, j_5}^2 x_{1, j_6}^2)$  and  $\mathbb{E}(\prod_{t=1}^8 x_{1, j_t}) = \mathbb{E}(x_{1, j_1}^2 x_{1, j_2}^2 x_{1, j_5}^2 x_{1, j_6}^2)$ . Following the notation in (B.1.44), let  $(\tilde{j}_1 \leq \tilde{j}_2 \leq \tilde{j}_5 \leq \tilde{j}_6)$  be the ordered version of  $(j_1, j_2, j_5, j_6)$ . When  $\min\{\tilde{j}_2 - \tilde{j}_1, \tilde{j}_5 - \tilde{j}_2, \tilde{j}_6 - \tilde{j}_5\} \leq D_0$ , the total number of distinct  $j$  indexes is  $O(p^3 D_0)$ . When  $\min\{\tilde{j}_2 - \tilde{j}_1, \tilde{j}_5 - \tilde{j}_2, \tilde{j}_6 - \tilde{j}_5\} > D_0$ , by Conditions 2.1 and 2.2, and the  $\alpha$ -mixing inequality in Lemma B.0.1,

$$\begin{aligned} &\left| \mathbb{E} \left( \prod_{t=1}^4 x_{1, j_t} \right) \mathbb{E} \left( \prod_{t=5}^8 x_{1, j_t} \right) - \mathbb{E} \left( \prod_{t=1}^8 x_{1, j_t} \right) \right| \\ &= \left| \mathbb{E}(x_{1, j_1}^2 x_{1, j_2}^2) \mathbb{E}(x_{1, j_5}^2 x_{1, j_6}^2) - \mathbb{E}(x_{1, j_1}^2 x_{1, j_2}^2 x_{1, j_5}^2 x_{1, j_6}^2) \right| \\ &\leq C \delta^{\frac{D_0 \epsilon}{2+\epsilon}} = O(p^{-(8+\mu)}). \end{aligned}$$

- (b) When both  $(j_1, j_2, j_3, j_4)$  and  $(j_5, j_6, j_7, j_8)$  contain at least 3 distinct indexes, i.e.,  $|\{j_1, j_2, j_3, j_4\}| \geq 3$  and  $|\{j_5, j_6, j_7, j_8\}| \geq 3$ , we know similarly (B.1.53) and (B.1.54) hold. When  $\max\{\kappa_1, \kappa_2\} > D_0$ , by Conditions 2.1 and 2.2, and the  $\alpha$ -mixing inequality in Lemma B.0.1, we obtain

$$|\mathbb{D}_{k,a_1,a_2,2,q}| \leq C(\text{B.1.53}) \times (\text{B.1.54}) \leq C \delta^{\frac{D_0 \epsilon}{2+\epsilon}} = O\{p^{-(8+\mu)}\}.$$

When  $\max\{\kappa_1, \kappa_2\} \leq D_0$ , by the definitions in (B.1.45), we know under this case, the indexes in  $(j_1, j_2, j_3, j_4)$  are close to each other within

the distance  $D_0$ , and the indexes in  $(j_5, j_6, j_7, j_8)$  are also close to each other within the distance  $D_0$ . Then the total number of distinct  $j$  indexes is  $O(pD_0^3 \times pD_0^3) = O(p^2D_0^6)$ .

- (c) When only one of  $(j_1, j_2, j_3, j_4)$  and  $(j_5, j_6, j_7, j_8)$  contains at least 3 distinct indexes, without loss of generality, we assume  $|\{j_1, j_2, j_3, j_4\}| \geq 3$  and  $|\{j_5, j_6, j_7, j_8\}| = 2$ . Recall  $\kappa_1$  defined in (B.1.45). When  $\kappa_1 \leq D_0$ , the indexes in  $(j_1, j_2, j_3, j_4)$  are close within distance  $D_0$ . As  $(j_5, j_6, j_7, j_8)$  only contains 2 distinct indexes, the total number of distinct  $j$  indexes is  $O(p^3D_0^3)$ . When  $\kappa_1 > D_0$ , by Conditions 2.1 and 2.2, and the  $\alpha$ -mixing inequality in Lemma B.0.1, we know similarly (B.1.53) holds, and

$$|\mathbb{D}_{k,a_1,a_2,2,q}| \leq C(\text{B.1.53}) \leq C\delta^{\frac{D_0\epsilon}{2+\epsilon}} = O(p^{-(8+\mu)}).$$

In summary,

$$(B.1.59) \quad |\mathbb{D}_{k,a_1,a_2,2,q}| = p^8 \times O(p^{-(8+\mu)}) + O(p^3D_0^3) = O(p^3 \log^3 p).$$

Thus we obtain that for given  $(\mathbf{i}^{(1)}, \mathbf{i}^{(2)}, \mathbf{i}^{(3)}, \mathbf{i}^{(4)})$ ,  $\mathbb{D}_{k,a_1,a_2,2,q} = O(p^3 \log^3 p)$ . Combined with (B.1.58),  $\text{var}(\mathbb{T}_{k,a_1,a_2,2}^2) = O(n^{-2}p^{-1} \log^3 p)$  follows.

Combining the results in *Step I* and *Step II* above, we obtain  $\text{var}(\mathbb{T}_{k,a_1,a_2}) = O(n^{-2}p^{-1} \log^3 p)$ , and thus Lemma A.2.5 is proved under Condition 2.2.

*B.1.5.3. Proof under Condition 2.2\**. In this section, we prove Lemma A.2.5 by substituting Condition 2.2 with Condition 2.2\*. Note that although the independence between  $x_{i,j}$ 's is assumed in Section B.1.5.1, it is only used to specify certain joint moments of  $x_{i,j}$ 's. Alternatively, Condition 2.2\* is assumed to obtain similar properties on the joint moments, and the proof follows similarly to that in Section B.1.5.1.

In particular, we will prove that  $\text{var}(\mathbb{T}_{k,a_1,a_2}) = O(n^{-3} + n^{-2}p^{-2})$  for two given finite integers  $a_1$  and  $a_2$  below. Under  $H_0$  and given Condition 2.2\*, as  $j_1 \neq j_2$  and  $j_3 \neq j_4$ , we have  $\mathbb{E}(x_{1,j_1}x_{1,j_2}x_{1,j_3}x_{1,j_4}) \neq 0$  only when  $\{j_1, j_2\} = \{j_3, j_4\}$ , and then  $\mathbb{E}(x_{1,j_1}x_{1,j_2}x_{1,j_3}x_{1,j_4}) = \kappa_1 \mathbb{E}(x_{1,j_1}^2) \mathbb{E}(x_{1,j_2}^2)$ . It follows that  $\mathbb{T}_{k,a_1,a_2} = 2c(n, a) \times \tilde{T}_{k,a_1,a_2}$ , where  $\tilde{T}_{k,a,a} = \kappa_1 T_{k,a,a}$  with  $T_{k,a,a}$  defined in Section B.1.5.1. To prove  $\text{var}(\mathbb{T}_{k,a,a}) = o(n^{-2})$ , it suffices to show that  $\text{var}(\tilde{T}_{k,a_1,a_2}) = n^{a_1+a_2-2}p^4 O(n^{-1} + p^{-2})$  as argued in Section B.1.5.1.

Similarly to Section B.1.5.1, to show  $\text{var}(\tilde{T}_{k,a_1,a_2}) = n^{a_1+a_2-2}p^4 O(n^{-1} + p^{-2})$ , we examine  $\{\mathbb{E}(\tilde{T}_{k,a_1,a_2})\}^2$  and  $\mathbb{E}(\tilde{T}_{k,a_1,a_2}^2)$  respectively. For  $\mathbb{E}(\tilde{T}_{k,a_1,a_2})$ , under Condition 2.2\*, similarly to (B.1.35), we know  $\mathbb{E}\{(\prod_{t=1}^{a_1-1} x_{i_t,j_1} x_{i_t,j_2}) \times (\prod_{t=1}^{a_2-1} \tilde{x}_{i_t,j_1} \tilde{x}_{i_t,j_2})\} \neq 0$  only when  $\{\mathbf{i}\} = \{\tilde{\mathbf{i}}\}$ . When  $\{\mathbf{i}\} = \{\tilde{\mathbf{i}}\}$ , we write  $a_1 = a_2 = a$  for some  $a$  and then  $\mathbb{E}\{(\prod_{t=1}^{a_1-1} x_{i_t,j_1} x_{i_t,j_2}) \times (\prod_{t=1}^{a_2-1} \tilde{x}_{i_t,j_1} \tilde{x}_{i_t,j_2})\} =$

$\{\kappa_1 \mathbb{E}(x_{1,j_1}^2) \mathbb{E}(x_{1,j_2}^2)\}^{a-1}$ . We thus have  $\{\mathbb{E}(\tilde{T}_{k,a_1,a_2}^2)\}^2 = \{\kappa_1^a \mathbb{E}(T_{k,a_1,a_2}^2)\}^2$  with  $T_{k,a_1,a_2}$  defined in Section B.1.5.1. Moreover, following (B.1.36) in Section B.1.5.1, we have

$$\mathbb{E}(\tilde{T}_{k,a_1,a_2}^2) = \sum_{\substack{\mathbf{i}, \mathbf{m} \in \mathcal{P}(k-1, a_1-1); \\ \tilde{\mathbf{i}}, \tilde{\mathbf{m}} \in \mathcal{P}(k-1, a_2-1)}} \sum_{\substack{1 \leq j_1 \neq j_2 \leq p; \\ 1 \leq j_3 \neq j_4 \leq p}} \tilde{Q}(\mathbf{i}, \tilde{\mathbf{i}}, \mathbf{m}, \tilde{\mathbf{m}}, \mathbf{j}).$$

We further decompose  $\mathbb{E}(\tilde{T}_{k,a_1,a_2}^2) = \mathbb{E}(\tilde{T}_{k,a_1,a_2}^2)_{(1)} + \mathbb{E}(\tilde{T}_{k,a_1,a_2}^2)_{(2)}$ , where  $\mathbb{E}(\tilde{T}_{k,a_1,a_2}^2)_{(1)}$  and  $\mathbb{E}(\tilde{T}_{k,a_1,a_2}^2)_{(2)}$  are defined with the same forms as  $\mathbb{E}(T_{k,a_1,a_2}^2)_{(1)}$  and  $\mathbb{E}(T_{k,a_1,a_2}^2)_{(2)}$  in Section B.1.5.1, respectively. To prove  $\text{var}(\tilde{T}_{k,a_1,a_2}) = n^{a_1+a_2-2} p^4 O(n^{-1} + p^{-2})$ , similarly to Section B.1.5.1, we derive  $|\mathbb{E}(\tilde{T}_{k,a_1,a_2}^2)_{(1)} - \{\mathbb{E}(\tilde{T}_{k,a_1,a_2})\}^2|$  and  $\mathbb{E}(T_{k,a_1,a_2}^2)_{(2)}$  respectively.

*Step I:*  $|\mathbb{E}(\tilde{T}_{k,a_1,a_2}^2)_{(1)} - \{\mathbb{E}(\tilde{T}_{k,a_1,a_2})\}^2|$ . By the forms of  $\mathbb{E}(\tilde{T}_{k,a_1,a_2}^2)_{(1)}$  and  $\mathbb{E}(\tilde{T}_{k,a_1,a_2})$ , we consider  $\{\mathbf{i}\} = \{\tilde{\mathbf{i}}\}$  and  $\{\mathbf{m}\} = \{\tilde{\mathbf{m}}\}$  below. If  $\{\mathbf{i}\} \cap \{\mathbf{m}\} = \emptyset$ ,  $|\mathbb{E}\{\tilde{Q}(\mathbf{i}, \tilde{\mathbf{i}}, \mathbf{m}, \tilde{\mathbf{m}}, \mathbf{j})\} - \kappa_1^{2a} \prod_{t=1}^4 \{\mathbb{E}(x_{1,j_t}^2)\}^a| = 0$  by Condition 2.2\*; if  $\{\mathbf{i}\} \cap \{\mathbf{m}\} \neq \emptyset$ ,  $|\{\mathbf{i}\} \cup \{\mathbf{m}\}| \leq a_1 + a_2 - 2 - 1$ , thus  $|\mathbb{E}(\tilde{T}_{k,a_1,a_2}^2)_{(1)} - \{\mathbb{E}(\tilde{T}_{k,a_1,a_2})\}^2| = O(n^{a_1+a_2-3} p^4)$  by Condition 2.1.

*Step II:*  $\mathbb{E}(T_{k,a_1,a_2}^2)_{(2)}$ . We note that for  $j_1 \neq j_2$ ,  $\mathbb{E}(x_{1,j_1} x_{1,j_2}) = 0$ , and for any additional index  $j_3$ , we have  $\mathbb{E}(x_{1,j_1} x_{1,j_2} x_{1,j_3}) = 0$  under Condition 2.2\*. Thus (B.1.41) and (B.1.42) still hold here, and we obtain  $\mathbb{E}(T_{k,a_1,a_2}^2)_{(2)} = O(n^{a_1+a_2-2} p^2)$ .

In summary,

$$\begin{aligned} |\text{var}(T_{k,a_1,a_2})| &\leq |\mathbb{E}(\tilde{T}_{k,a_1,a_2}^2)_{(1)} - \{\mathbb{E}(\tilde{T}_{k,a_1,a_2})\}^2| + |\mathbb{E}(T_{k,a_1,a_2}^2)_{(2)}| \\ &= n^{a_1+a_2-2} p^4 O(n^{-1} + p^{-2}). \end{aligned}$$

It follows that  $\text{var}(\sum_{k=1}^n \pi_{n,k}^2) = O(n^{-1} + p^{-2})$  by the argument at the beginning of Section B.1.5. Therefore Lemma A.2.5 is proved.

B.1.6. *Proof of Lemma A.2.6 (on Page 5, Section A.2).* By Lemma A.2.4,

$$(B.1.60) \quad \sum_{k=1}^n \mathbb{E}(D_{n,k}^4) = \sum_{k=1}^n \sum_{1 \leq r_1, r_2, r_3, r_4 \leq m} \prod_{l=1}^4 t_{r_l} \times \mathbb{E}\left(\prod_{l=1}^4 A_{n,k,a_{r_l}}\right).$$

To prove Lemma A.2.6, it suffices to show that for given  $1 \leq k \leq n$  and  $1 \leq r_1, r_2, r_3, r_4 \leq m$ , we have  $\mathbb{E}(\prod_{l=1}^4 A_{n,k,a_{r_l}}) = O(n^{-2})$ .

Similarly to Sections B.1.1 and B.1.5 above, we first illustrate the proof of Lemma A.2.6, when  $x_{i,j}$ 's are independent. Then in Section B.1.6.2, we prove Lemma A.2.6 under Condition 2.2. Last in Section B.1.6.3, we prove Lemma A.2.6 under Condition 2.2\*.

*B.1.6.1. Proof illustration.* In this section, we assume that  $x_{i,j}$ 's are independent and prove  $E(\prod_{l=1}^4 A_{n,k,a_l}) = O(n^{-2})$  for given integers  $a_l$ ,  $l = 1, \dots, 4$ . By Lemma A.2.4, when  $k < a_l$ ,  $A_{n,k,a_l} = 0$ . We next focus on  $\max_{1 \leq l \leq 4} a_l \leq k \leq n$ . By Lemma A.2.4, we have

$$(B.1.61) \quad E\left(\prod_{l=1}^4 A_{n,k,a_l}\right) = \left\{ \prod_{l=1}^4 c(n, a_l) \right\}^{1/2} \sum_{\substack{\mathbf{i}^{(l)} \in \mathcal{P}(k-1, a_l-1), l=1, \dots, 4; \\ (j_1, j_2), (j_3, j_4), (j_5, j_6), (j_7, j_8) \in \mathcal{J}}} Q^*(\mathbf{i}^{(1)}, \mathbf{i}^{(2)}, \mathbf{i}^{(3)}, \mathbf{i}^{(4)}, \mathbf{j}_8),$$

where  $\mathbf{i}^{(l)} = (i_1^{(l)}, \dots, i_{a_l-1}^{(l)})$ ,  $l = 1, \dots, 4$  represent the tuples satisfying  $1 \leq i_1^{(l)} \neq \dots \neq i_{a_l-1}^{(l)} \leq n$ ;  $\mathcal{J} = \{(j_1, j_2) : 1 \leq j_1 \neq j_2 \leq p\}$ ;  $\mathbf{j}_8$  represents the tuple  $(j_1, j_2, j_3, j_4, j_5, j_6, j_7, j_8)$ ; and we define

$$Q^*(\mathbf{i}^{(1)}, \mathbf{i}^{(2)}, \mathbf{i}^{(3)}, \mathbf{i}^{(4)}, \mathbf{j}_8) = E\left(\prod_{r=1}^8 x_{k, j_r}\right) E\left(\prod_{t=1}^{a_1-1} \prod_{l=1}^4 x_{i_t^{(l)}, j_{2l-1}} x_{i_t^{(l)}, j_{2l}}\right).$$

We claim that  $E(\prod_{r=1}^8 x_{k, j_r}) \neq 0$  only when

$$(B.1.62) \quad |\{j_t : t = 1, \dots, 8\}| \leq 4.$$

If  $|\{j_t : t = 1, \dots, 8\}| \geq 5$ , it implies that one of the  $j$  index in  $\{j_t : t = 1, \dots, 8\}$  only appears once. We assume without loss of generality that  $j_1$  only appears once, i.e.,  $j_1 \notin \{j_t : t = 2, \dots, 8\}$ . Since  $x_{k,j}$ 's are independent,  $E(\prod_{r=1}^8 x_{k, j_r}) = E(x_{k, j_1})E(\text{all the remaining terms}) = 0$ . Thus (B.1.62) is proved. Similarly to (B.1.39) and (B.1.40), we further know  $Q^*(\mathbf{i}^{(1)}, \mathbf{i}^{(2)}, \mathbf{i}^{(3)}, \mathbf{i}^{(4)}, \mathbf{j}_8) \neq 0$  only when

$$(B.1.63) \quad \left| \bigcup_{l=1}^4 \{\mathbf{i}^{(l)}\} \right| \leq \sum_{l=1}^4 (a_l - 1)/2.$$

In summary, combining (B.1.62) and (B.1.63), we have

$$E\left(\prod_{l=1}^4 A_{n,k,a_l}\right) = O(p^{-4} n^{-\frac{1}{2} \sum_{l=1}^4 a_l} n^{\frac{1}{2} \sum_{l=1}^4 (a_l-1)} p^4) = O(n^{-2}).$$

*B.1.6.2. Proof under Condition 2.2.* Section B.1.6.1 proves Lemma A.2.6 when  $x_{i,j}$ 's are independent. In this section, we further prove Lemma A.2.6 under Condition 2.2. We first illustrate the proof idea intuitively, which is similar to Sections B.1.1.2 and B.1.5.2. Under Condition 2.2,  $x_{i,j}$ 's may be no longer independent, but the dependence between  $x_{i,j_1}$  and  $x_{i,j_2}$  degenerates exponentially with their distance  $|j_1 - j_2|$ . To quantitatively examine  $|j_1 - j_2|$ , we use the threshold of distance  $D_0$  defined in (B.1.46). Intuitively, when  $|j_1 - j_2| > D_0$ ,  $x_{i,j_1}$  and  $x_{i,j_2}$  are “asymptotically independent” with similar properties to those under the independence case in Section B.1.6.1. The following proof will provide comprehensive discussions based on  $D_0$ .

We next present the detailed proof of Lemma A.2.6. Note that to prove Lemma A.2.6, by the analysis at the beginning of Section B.1.6, it suffices to show  $\mathbb{E}(\prod_{l=1}^4 A_{n,k,a_l}) = O(n^{-2})$ . Recall that we can write (B.1.61) and we have  $\prod_{l=1}^4 c^{1/2}(n, a_l) = \Theta(p^{-4} n^{-\frac{1}{2} \sum_{l=1}^4 a_l})$ . It remains to show

$$(B.1.64) \quad \sum_{\substack{\mathbf{i}^{(l)} \in \mathcal{P}(k-1, a_l-1), l=1, \dots, 4; \\ (j_1, j_2), (j_3, j_4), (j_5, j_6), (j_7, j_8) \in \mathcal{J}}} Q^*(\mathbf{i}^{(1)}, \mathbf{i}^{(2)}, \mathbf{i}^{(3)}, \mathbf{i}^{(4)}, \mathbf{j}_8) = O(p^4 n^{\frac{1}{2} \sum_{l=1}^4 (a_l-1)}).$$

To prove (B.1.64), we show the order of (B.1.64) in  $n$  and  $p$  respectively in the following two steps.

*Step I: order of  $n$ .* We show for any fixed  $\mathbf{j}_8 = (j_1, j_2, j_3, j_4, j_5, j_6, j_7, j_8)$ ,

$$(B.1.65) \quad \left| \sum_{\mathbf{i}^{(l)} \in \mathcal{P}(k-1, a_l-1), l=1, \dots, 4} Q^*(\mathbf{i}^{(1)}, \mathbf{i}^{(2)}, \mathbf{i}^{(3)}, \mathbf{i}^{(4)}, \mathbf{j}_8) \right| = O(n^{\frac{1}{2} \sum_{l=1}^4 (a_l-1)}).$$

We note that  $Q^*(\mathbf{i}^{(1)}, \mathbf{i}^{(2)}, \mathbf{i}^{(3)}, \mathbf{i}^{(4)}, \mathbf{j}_8) \neq 0$  only if (B.1.63) holds. To see this, suppose one index  $i_1$  only appears once in the four sets  $\{\mathbf{i}^{(1)}\}, \{\mathbf{i}^{(2)}\}, \{\mathbf{i}^{(3)}\}, \{\mathbf{i}^{(4)}\}$ . For example  $i_1 \in \{\mathbf{i}^{(1)}\}$ , but  $i_1 \notin \cup_{l=2}^4 \{\mathbf{i}^{(l)}\}$ . Then

$$Q^*(\mathbf{i}^{(1)}, \mathbf{i}^{(2)}, \mathbf{i}^{(3)}, \mathbf{i}^{(4)}, \mathbf{j}_8) = \mathbb{E}(x_{i_1, j_1} x_{i_1, j_2}) \times \mathbb{E}(\text{the remaining terms}) = 0,$$

Therefore by (B.1.63) and Condition 2.1,

$$(B.1.66) \quad (B.1.65) = O(n^{\frac{1}{2} \sum_{l=1}^4 (a_l-1)}).$$

*Step II: order of  $p$ .* To prove (B.1.64), it remains to show that for given  $(\mathbf{i}^{(1)}, \mathbf{i}^{(2)}, \mathbf{i}^{(3)}, \mathbf{i}^{(4)})$ ,

$$(B.1.67) \quad \sum_{(j_1, j_2), (j_3, j_4), (j_5, j_6), (j_7, j_8) \in \mathcal{J}} Q^*(\mathbf{i}^{(1)}, \mathbf{i}^{(2)}, \mathbf{i}^{(3)}, \mathbf{i}^{(4)}, \mathbf{j}_8) = O(p^4).$$

Let  $\mu$  be a positive constant same as in (B.1.46). Define an event  $B_J^c = \{Q^*(\mathbf{i}^{(1)}, \mathbf{i}^{(2)}, \mathbf{i}^{(3)}, \mathbf{i}^{(4)}, \mathbf{j}_8) = O(p^{-(8+\mu)})\}$  and let  $B_J$  represent the complement set of  $B_J^c$  correspondingly. Note that

$$\sum_{(j_1, j_2), (j_3, j_4), (j_5, j_6), (j_7, j_8) \in \mathcal{J}} Q^*(\mathbf{i}^{(1)}, \mathbf{i}^{(2)}, \mathbf{i}^{(3)}, \mathbf{i}^{(4)}, \mathbf{j}_8) \times \mathbf{1}_{B_J^c} = O(p^8 p^{-(8+\mu)}) = o(1).$$

Moreover by Condition 2.1,  $Q^*(\mathbf{i}^{(1)}, \mathbf{i}^{(2)}, \mathbf{i}^{(3)}, \mathbf{i}^{(4)}, \mathbf{j}_8) = O(1)$  always holds. Thus to prove (B.1.67), it remains to show

$$(B.1.68) \quad \sum_{(j_1, j_2), (j_3, j_4), (j_5, j_6), (j_7, j_8) \in \mathcal{J}} \mathbf{1}_{B_J} = O(p^4).$$

We write the ordered version of  $\mathbf{j}_8 = (j_1, j_2, j_3, j_4, j_5, j_6, j_7, j_8)$  as  $\tilde{\mathbf{j}}_8 = (\tilde{j}_1, \tilde{j}_2, \tilde{j}_3, \tilde{j}_4, \tilde{j}_5, \tilde{j}_6, \tilde{j}_7, \tilde{j}_8)$ , which satisfies  $\tilde{j}_1 \leq \tilde{j}_2 \leq \tilde{j}_3 \leq \tilde{j}_4 \leq \tilde{j}_5 \leq \tilde{j}_6 \leq \tilde{j}_7 \leq \tilde{j}_8$ . To facilitate the proof, we first introduce three claims below, which will be proved later. In particular, for given  $\mathbf{j}_8$ , if  $\mathbf{1}_{B_J} = 1$ , the corresponding ordered tuple  $\tilde{\mathbf{j}}_8$  of  $\mathbf{j}_8$  satisfies the following three claims with  $D_0$  defined in (B.1.46).

**Claim 1** : For any index  $\tilde{j}_k \in \tilde{\mathbf{j}}_8$ , if it has two neighbors  $\tilde{j}_{k-1}$  and  $\tilde{j}_{k+1}$ , its distances with the two neighbors  $\tilde{j}_{k-1}$  and  $\tilde{j}_{k+1}$  can not be bigger than  $D_0$  together. That is, at least one of  $|\tilde{j}_{k-1} - \tilde{j}_k| \leq D_0$  and  $|\tilde{j}_k - \tilde{j}_{k+1}| \leq D_0$  is true. For  $\tilde{j}_1$  and  $\tilde{j}_8$  with only one neighbor, they satisfy  $|\tilde{j}_1 - \tilde{j}_2| \leq D_0$  and  $|\tilde{j}_7 - \tilde{j}_8| \leq D_0$ .

**Claim 2** : For a pair of indexes  $(\tilde{j}_{k-1}, \tilde{j}_k)$  in  $\tilde{\mathbf{j}}_8$ , when  $\tilde{j}_{k-1} \neq \tilde{j}_k$ , if it has two neighbors  $\tilde{j}_{k-2}$  and  $\tilde{j}_{k+1}$ , the distances of the pair with the two neighbors can not be bigger than  $D_0$  together. That is, at least one of  $|\tilde{j}_{k-2} - \tilde{j}_{k-1}| \leq D_0$  and  $|\tilde{j}_k - \tilde{j}_{k+1}| \leq D_0$  holds. For the pairs  $(\tilde{j}_1, \tilde{j}_2)$  and  $(\tilde{j}_7, \tilde{j}_8)$  with only one neighbor, when  $\tilde{j}_1 \neq \tilde{j}_2$  and  $\tilde{j}_7 \neq \tilde{j}_8$ , they satisfy  $|\tilde{j}_2 - \tilde{j}_3| \leq D_0$  and  $|\tilde{j}_6 - \tilde{j}_7| \leq D_0$ .

**Claim 3** :

(a) For any given  $\{\tilde{j}_4, \tilde{j}_5, \tilde{j}_6, \tilde{j}_7, \tilde{j}_8\}$ ,

$$\sum_{\tilde{j}_1, \tilde{j}_2, \tilde{j}_3} \mathbf{1}_{B_J \cap \{\tilde{j}_1 = \tilde{j}_2\}} = O(p^2), \quad \sum_{\tilde{j}_1, \tilde{j}_2, \tilde{j}_3} \mathbf{1}_{B_J \cap \{\tilde{j}_1 \neq \tilde{j}_2\}} = O(pD_0^2).$$

(b) For any given  $\{\tilde{j}_1, \tilde{j}_2, \tilde{j}_3, \tilde{j}_4, \tilde{j}_5\}$ ,

$$\sum_{\tilde{j}_6, \tilde{j}_7, \tilde{j}_8} \mathbf{1}_{B_J \cap \{\tilde{j}_7 = \tilde{j}_8\}} = O(p^2), \quad \sum_{\tilde{j}_6, \tilde{j}_7, \tilde{j}_8} \mathbf{1}_{B_J \cap \{\tilde{j}_7 \neq \tilde{j}_8\}} = O(pD_0^2).$$

Given three claims above, we show (B.1.68) by discussing different cases.

1. When both  $\tilde{j}_1 \neq \tilde{j}_2$  and  $\tilde{j}_7 \neq \tilde{j}_8$ , by Claim 3, we know the summation over indexes  $(\tilde{j}_1, \tilde{j}_2, \tilde{j}_3)$  is of order  $pD_0^2$  and the summation over indexes  $(\tilde{j}_6, \tilde{j}_7, \tilde{j}_8)$  is also of order  $pD_0^2$ . Then we consider  $(\tilde{j}_4, \tilde{j}_5)$ . When  $|\tilde{j}_4 - \tilde{j}_5| \leq D_0$ , the summation is of order  $(pD_0^2) \times pD_0 \times pD_0^2 = p^3D_0^5 = p^4$ . When  $|\tilde{j}_4 - \tilde{j}_5| > D_0$ , applying Claim 1 on  $\tilde{j}_4$  and  $\tilde{j}_5$  respectively, we know  $|\tilde{j}_3 - \tilde{j}_4| \leq D_0$  and  $|\tilde{j}_5 - \tilde{j}_6| \leq D_0$  hold. Therefore, the summation is of order  $pD_0^2 \times D_0 \times p \times D_0 \times pD_0^2 = p^3D_0^6 = p^4$ . In summary,

$$\sum_{(\tilde{j}_1, \tilde{j}_2), (\tilde{j}_3, \tilde{j}_4), (\tilde{j}_5, \tilde{j}_6), (\tilde{j}_7, \tilde{j}_8) \in \mathcal{J}} \mathbf{1}_{B_J \cap \{\tilde{j}_1 \neq \tilde{j}_2, \tilde{j}_7 \neq \tilde{j}_8\}} = O(p^4).$$

2. When only one of  $\tilde{j}_1 \neq \tilde{j}_2$  and  $\tilde{j}_7 \neq \tilde{j}_8$  holds, without loss of generality, we consider  $\tilde{j}_1 = \tilde{j}_2$  and  $\tilde{j}_7 \neq \tilde{j}_8$ .

- (a) When  $|\tilde{j}_2 - \tilde{j}_3| > D_0$ , applying Claim 1 on  $\tilde{j}_3$ , we know  $|\tilde{j}_3 - \tilde{j}_4| \leq D_0$ . Then consider the pair  $(\tilde{j}_3, \tilde{j}_4)$ . If  $\tilde{j}_3 = \tilde{j}_4$ , by Claim 1,  $|\tilde{j}_5 - \tilde{j}_4| \leq D_0$  or  $|\tilde{j}_5 - \tilde{j}_6| \leq D_0$  holds. As  $\tilde{j}_7 \neq \tilde{j}_8$ , by Claim 3, the summation over  $(\tilde{j}_6, \tilde{j}_7, \tilde{j}_8)$  is of order  $pD_0^2$ . Therefore, the total summation order is  $O(p \times p \times D_0 \times pD_0^2) = O(p^4)$ . If  $\tilde{j}_3 \neq \tilde{j}_4$ , applying Claim 2 on the pair  $(\tilde{j}_3, \tilde{j}_4)$ , we know  $|\tilde{j}_4 - \tilde{j}_5| \leq D_0$  as we discuss  $|\tilde{j}_2 - \tilde{j}_3| > D_0$ . Also, as  $\tilde{j}_7 \neq \tilde{j}_8$ , by Claim 3, the summation order over  $(\tilde{j}_6, \tilde{j}_7, \tilde{j}_8)$  is  $O(pD_0^2)$ . Thus the total order of summation is  $O(pD_0 pD_0^2 pD_0^2) = O(p^4)$ . In summary,

$$\sum_{(\tilde{j}_1, \tilde{j}_2), (\tilde{j}_3, \tilde{j}_4), (\tilde{j}_5, \tilde{j}_6), (\tilde{j}_7, \tilde{j}_8) \in \mathcal{J}} \mathbf{1}_{\{B_J \cap \{\text{one of } \tilde{j}_1 \neq \tilde{j}_2 \text{ or } \tilde{j}_7 \neq \tilde{j}_8, |\tilde{j}_2 - \tilde{j}_3| > D_0\}\}} = O(p^4).$$

- (b) When  $|\tilde{j}_2 - \tilde{j}_3| \leq D_0$ , the summation over  $\tilde{j}_1, \tilde{j}_2, \tilde{j}_3$  is of order  $pD_0$ . Then we consider  $\tilde{j}_4, \tilde{j}_5$ . If  $|\tilde{j}_4 - \tilde{j}_5| \leq D_0$ , the summation over  $\tilde{j}_1, \tilde{j}_2, \tilde{j}_3, \tilde{j}_4, \tilde{j}_5$  is of order  $pD_0 pD_0 = p^2D_0^2$ . As  $\tilde{j}_7 \neq \tilde{j}_8$ , by Claim 3, we know the summation order of  $\tilde{j}_6, \tilde{j}_7, \tilde{j}_8$  is  $pD_0^2$ . Then the total summation order of this case is  $O(1)p^2D_0^2 pD_0^2 = O(p^4)$ . If  $|\tilde{j}_4 - \tilde{j}_5| > D_0$ , applying Claim 1 on  $\tilde{j}_4$  and  $\tilde{j}_5$  respectively, we have  $|\tilde{j}_3 - \tilde{j}_4| \leq D_0$  and  $|\tilde{j}_5 - \tilde{j}_6| \leq D_0$ . Also, as  $\tilde{j}_7 \neq \tilde{j}_8$ , by Claim 3, we know the summation order of  $\tilde{j}_6, \tilde{j}_7, \tilde{j}_8$  is  $O(pD_0^2)$ . Then the total summation order is  $O(1)pD_0 \times D_0 pD_0 \times pD_0^2 = O(p^4)$ . In summary,

$$\sum_{(\tilde{j}_1, \tilde{j}_2), (\tilde{j}_3, \tilde{j}_4), (\tilde{j}_5, \tilde{j}_6), (\tilde{j}_7, \tilde{j}_8) \in \mathcal{J}} \mathbf{1}_{\{B_J \cap \{\text{one of } \tilde{j}_1 \neq \tilde{j}_2 \text{ or } \tilde{j}_7 \neq \tilde{j}_8, |\tilde{j}_2 - \tilde{j}_3| \leq D_0\}\}} = O(p^4).$$

3. When both  $\tilde{j}_1 = \tilde{j}_2$  and  $\tilde{j}_7 = \tilde{j}_8$ , then we consider  $(\tilde{j}_3, \tilde{j}_4, \tilde{j}_5, \tilde{j}_6)$ .
- (a) If the number of distinct elements in  $\{\tilde{j}_3, \tilde{j}_4, \tilde{j}_5, \tilde{j}_6\}$  is smaller and equal to 2, the order of summation over  $\tilde{j}_3, \tilde{j}_4, \tilde{j}_5, \tilde{j}_6$  is  $O(p^2)$ . We use  $|\{\tilde{j}_3, \tilde{j}_4, \tilde{j}_5, \tilde{j}_6\}| \leq 2$  to represent this case, then

$$\sum_{\substack{(j_1, j_2), (j_3, j_4), \\ (j_5, j_6), (j_7, j_8) \in \mathcal{J}}} \mathbf{1}_{\{B_J \cap \{\tilde{j}_1 = \tilde{j}_2, \tilde{j}_7 = \tilde{j}_8, |\{\tilde{j}_3, \tilde{j}_4, \tilde{j}_5, \tilde{j}_6\}| \leq 2\}\}} = O(p^4).$$

- (b) If the number of distinct elements in  $\{\tilde{j}_3, \tilde{j}_4, \tilde{j}_5, \tilde{j}_6\}$  is 3, we use  $|\{\tilde{j}_3, \tilde{j}_4, \tilde{j}_5, \tilde{j}_6\}| = 3$  to represent this case. Then two of  $\tilde{j}_3 \neq \tilde{j}_4$ ,  $\tilde{j}_4 \neq \tilde{j}_5$  and  $\tilde{j}_5 \neq \tilde{j}_6$  hold. We consider without loss of generality  $\tilde{j}_3 \neq \tilde{j}_4$ ,  $\tilde{j}_4 \neq \tilde{j}_5$  and  $\tilde{j}_5 = \tilde{j}_6$ . We apply Claim 2 on the pair  $(\tilde{j}_3, \tilde{j}_4)$  and Claim 1 on  $\tilde{j}_3$ . Then at least two of  $|\tilde{j}_2 - \tilde{j}_3| \leq D_0$ ,  $|\tilde{j}_3 - \tilde{j}_4| \leq D_0$  and  $|\tilde{j}_4 - \tilde{j}_5| \leq D_0$  holds. Thus the summation order is  $O(pD_0^2p^2) = O(p^4)$ . In summary,

$$\sum_{\substack{(j_1, j_2), (j_3, j_4), \\ (j_5, j_6), (j_7, j_8) \in \mathcal{J}}} \mathbf{1}_{\{B_J \cap \{\tilde{j}_1 = \tilde{j}_2, \tilde{j}_7 = \tilde{j}_8, |\{\tilde{j}_3, \tilde{j}_4, \tilde{j}_5, \tilde{j}_6\}| = 3\}\}} = O(p^4).$$

- (c) If the number of distinct elements in  $\{\tilde{j}_3, \tilde{j}_4, \tilde{j}_5, \tilde{j}_6\}$  is 4, we use  $|\{\tilde{j}_3, \tilde{j}_4, \tilde{j}_5, \tilde{j}_6\}| = 4$  to represent this case, and we know  $\tilde{j}_3 \neq \tilde{j}_4$ ,  $\tilde{j}_4 \neq \tilde{j}_5$  and  $\tilde{j}_5 \neq \tilde{j}_6$ . Applying Claim 2 on the pair  $(\tilde{j}_3, \tilde{j}_4)$ , and applying Claim 1 on the two single indexes  $\tilde{j}_3$  and  $\tilde{j}_4$  respectively, we know at least two of  $|\tilde{j}_2 - \tilde{j}_3| \leq D_0$ ,  $|\tilde{j}_3 - \tilde{j}_4| \leq D_0$  and  $|\tilde{j}_4 - \tilde{j}_5| \leq D_0$  hold. Therefore the summation over  $(\tilde{j}_1, \tilde{j}_2, \tilde{j}_3, \tilde{j}_4, \tilde{j}_5)$  is of order  $O(p \times pD_0^2) = O(p^2D_0^2)$ . Then applying Claim 1 on  $\tilde{j}_6$ , we know at least one of  $|\tilde{j}_5 - \tilde{j}_6| \leq D_0$  and  $|\tilde{j}_6 - \tilde{j}_7| \leq D_0$  holds. Then the total order of summation for this part is  $O(p^2D_0^2 \times pD_0) = O(p^4)$ , that is,

$$\sum_{\substack{(j_1, j_2), (j_3, j_4), \\ (j_5, j_6), (j_7, j_8) \in \mathcal{J}}} \mathbf{1}_{B_J \cap \{\tilde{j}_1 = \tilde{j}_2, \tilde{j}_7 = \tilde{j}_8, |\{\tilde{j}_3, \tilde{j}_4, \tilde{j}_5, \tilde{j}_6\}| = 4\}} = O(p^4).$$

Combining the results obtained, we know (B.1.68) is proved. Thus to prove (B.1.67), it remains to prove the three claims above.

By the definition of  $Q^*(\mathbf{i}^{(1)}, \mathbf{i}^{(2)}, \mathbf{i}^{(3)}, \mathbf{i}^{(4)}, \mathbf{j}_8)$  in Section B.1.6.1,

$$\left| Q^*(\mathbf{i}^{(1)}, \mathbf{i}^{(2)}, \mathbf{i}^{(3)}, \mathbf{i}^{(4)}, \mathbf{j}_8) \right| \leq C \left| \mathbb{E} \left( \prod_{t=1}^8 x_{k, \tilde{j}_t} \right) \right|.$$



Then it is sufficient to show that for given  $\mathbf{j}_8$ , when the ordered version  $\tilde{\mathbf{j}}_8$  of  $\mathbf{j}_8$  does not follow the three claims,

$$(B.1.69) \quad \left| \mathbb{E} \left( \prod_{t=1}^8 x_{k, \tilde{j}_t} \right) \right| = O(p^{-(8+\mu)}).$$

*Proof of Claim 1.*

(1) When the index  $\tilde{j}_k$  has two neighbors, we give the proof by an example of  $k = 3$ . All the other cases can be obtained following similar analysis without loss of generality. Suppose  $\tilde{j}_3$ 's distances between its neighbors  $\tilde{j}_2$  and  $\tilde{j}_4$  are both bigger than  $D_0$ , i.e.,  $|\tilde{j}_2 - \tilde{j}_3| > D_0$  and  $|\tilde{j}_3 - \tilde{j}_4| > D_0$ . Then by Conditions 2.1, 2.2, and the  $\alpha$ -mixing inequality in Lemma B.0.1,

$$\begin{aligned} & \left| \mathbb{E} \left( \prod_{t=1}^8 x_{k, \tilde{j}_t} \right) \right| \\ &= \left| \text{cov} \left( \prod_{t=1}^3 x_{k, \tilde{j}_t}, \prod_{t=4}^8 x_{k, \tilde{j}_t} \right) + \mathbb{E} \left( \prod_{t=1}^3 x_{k, \tilde{j}_t} \right) \times \mathbb{E} \left( \prod_{t=4}^8 x_{k, \tilde{j}_t} \right) \right| \\ &\leq C \delta^{\frac{D_0 \epsilon}{2+\epsilon}} + C \times |\text{cov}(x_{k, \tilde{j}_1} x_{k, \tilde{j}_2}, x_{k, \tilde{j}_3}) + \mathbb{E}(x_{k, \tilde{j}_1} x_{k, \tilde{j}_2}) \mathbb{E}(x_{k, \tilde{j}_3})| \\ &= O(p^{-(8+\mu)}) + C \times |\text{cov}(x_{k, \tilde{j}_1} x_{k, \tilde{j}_2}, x_{k, \tilde{j}_3})| \\ &= O(p^{-(8+\mu)}). \end{aligned}$$

Thus (B.1.69) holds.

(2) For  $\tilde{j}_1$  and  $\tilde{j}_8$  with only one neighbor, we give the proof on  $\tilde{j}_1$ , while  $\tilde{j}_8$  can be proved similarly. By Conditions 2.1, 2.2, and Lemma B.0.1,

$$\begin{aligned} \left| \mathbb{E} \left( \prod_{t=1}^8 x_{k, \tilde{j}_t} \right) \right| &= \left| \text{cov} \left( x_{k, \tilde{j}_1}, \prod_{t=2}^8 x_{k, \tilde{j}_t} \right) + \mathbb{E}(x_{k, \tilde{j}_1}) \times \mathbb{E} \left( \prod_{t=2}^8 x_{k, \tilde{j}_t} \right) \right| \\ &\leq C \delta^{\frac{D_0 \epsilon}{2+\epsilon}} + 0 \quad (\mathbb{E}(x_{k, \tilde{j}_1}) = 0) \\ &= O(p^{-(8+\mu)}). \end{aligned}$$

Thus (B.1.69) also holds.

*Proof of Claim 2:*

(1) When the pair  $(\tilde{j}_{k-1}, \tilde{j}_k)$  has two neighbors, we give the proof by the example when  $k = 5$ , i.e., we consider the pair  $(\tilde{j}_4, \tilde{j}_5)$ . The other cases can be proved similarly without loss of generality. Suppose  $\tilde{j}_4 \neq \tilde{j}_5$  with

$|\tilde{j}_3 - \tilde{j}_4| > D_0$  and  $|\tilde{j}_5 - \tilde{j}_6| > D_0$ . As  $\mathbb{E}(x_{k,\tilde{j}_4} x_{k,\tilde{j}_5}) = 0$  under  $H_0$ , by Conditions 2.1 and 2.2, and Lemma B.0.1, we have

$$\begin{aligned}
& \left| \mathbb{E} \left( \prod_{t=1}^8 x_{k,\tilde{j}_t} \right) \right| \\
&= \left| \text{cov} \left( \prod_{t=1}^3 x_{k,\tilde{j}_t}, \prod_{t=4}^8 x_{k,\tilde{j}_t} \right) + \mathbb{E} \left( \prod_{t=1}^3 x_{k,\tilde{j}_t} \right) \times \mathbb{E} \left( \prod_{t=4}^8 x_{k,\tilde{j}_t} \right) \right| \\
&\leq C\delta^{\frac{D_0\epsilon}{2+\epsilon}} + \left| \mathbb{E} \left( \prod_{t=1}^3 x_{k,\tilde{j}_t} \right) \times \left\{ \text{cov} \left( \prod_{t=4}^5 x_{k,\tilde{j}_t}, \prod_{t=6}^8 x_{k,\tilde{j}_t} \right) + \mathbb{E} \left( \prod_{t=4}^5 x_{\tilde{j}_t} \right) \mathbb{E} \left( \prod_{t=6}^8 x_{k,\tilde{j}_t} \right) \right\} \right| \\
&= C\delta^{\frac{D_0\epsilon}{2+\epsilon}} + \left| \mathbb{E}(x_{k,\tilde{j}_1} x_{k,\tilde{j}_2} x_{\tilde{j}_3}) \times \left\{ \text{cov}(x_{k,\tilde{j}_4} x_{k,\tilde{j}_5}, x_{k,\tilde{j}_6} x_{k,\tilde{j}_7} x_{k,\tilde{j}_8}) + 0 \right\} \right| \\
&\leq C\delta^{\frac{D_0\epsilon}{2+\epsilon}} = O(p^{-(8+\mu)}).
\end{aligned}$$

Thus (B.1.69) holds.

(2) For the pairs  $(\tilde{j}_1, \tilde{j}_2)$  and  $(\tilde{j}_7, \tilde{j}_8)$  with only one neighbor, we give the proof on  $(\tilde{j}_1, \tilde{j}_2)$ , while the proof on  $(\tilde{j}_7, \tilde{j}_8)$  can be obtained similarly. If  $\tilde{j}_1 \neq \tilde{j}_2$  and  $|\tilde{j}_2 - \tilde{j}_3| > D_0$ , as  $\mathbb{E}(x_{k,\tilde{j}_1} x_{k,\tilde{j}_2}) = 0$  under  $H_0$ , by Conditions 2.1 and 2.2, and the  $\alpha$ -mixing inequality in Lemma B.0.1, we have

$$\begin{aligned}
\left| \mathbb{E} \left( \prod_{t=1}^8 x_{k,\tilde{j}_t} \right) \right| &= \left| \text{cov} \left( \prod_{t=1}^2 x_{k,\tilde{j}_t}, \prod_{t=3}^8 x_{\tilde{j}_t} \right) + \mathbb{E} \left( \prod_{t=1}^2 x_{k,\tilde{j}_t} \right) \mathbb{E} \left( \prod_{t=3}^8 x_{\tilde{j}_t} \right) \right| \\
&\leq C\delta^{\frac{D_0\epsilon}{2+\epsilon}} = O(Cp^{-(8+\mu)}).
\end{aligned}$$

Thus (B.1.69) holds.

*Proof of Claim 3:* The Claim 3 (a) is obtained by applying Claim 1 on the  $\tilde{j}_1$  and Claim 2 on the pair  $(\tilde{j}_1, \tilde{j}_2)$  when  $\tilde{j}_1 \neq \tilde{j}_2$ . The Claim 3 (b) is also obtained similarly.

*B.1.6.3. Proof under Condition 2.2\*.* In this section, we prove Lemma A.2.6 by substituting Condition 2.2 with Condition 2.2\*. Similarly to Section B.1.5.3, the proof under Condition 2.2\* follows similarly to the proof under the independence case in Section B.1.6.1. In particular, we note that Condition 2.2\* implies that if one of the indexes in  $\{j_1, \dots, j_8\}$  only appears once,  $\mathbb{E}(\prod_{r=1}^8 x_{k,j_r}) = 0$ . Therefore when  $\mathbb{E}(\prod_{r=1}^8 x_{k,j_r}) \neq 0$ , (B.1.62) holds. Also following similar analysis, we know (B.1.63) holds by Condition 2.2\* and  $\mathbb{E}(x_{1,j_1} x_{1,j_2}) = 0$  for  $j_1 \neq j_2$ . Combining (B.1.62) and (B.1.63), Lemma A.2.6 is proved.

## B.2. Lemmas for the proof of Theorem 2.3.

B.2.1. *Proof of Lemma A.3.1 (on Page 7, Section A.3).* For easy illustration, we first prove Lemma A.3.1 when  $m = 1$  in Section B.2.1.1, and next present the proof for  $m > 1$  in Section B.2.1.2.

B.2.1.1. *Proof for  $m = 1$ .* Specifically, in this section, we prove

$$\left| P\left(\frac{\hat{M}_n}{n} > y_p, \frac{\tilde{U}(a)}{\sigma(a)} \leq 2z\right) - P\left(\frac{\hat{M}_n}{n} > y_p\right)P\left(\frac{\tilde{U}(a)}{\sigma(a)} \leq 2z\right) \right| \rightarrow 0.$$

Note that by definitions in (A.3.2) and (A.3.3),

$$\begin{aligned} \text{(B.2.1)} \quad & P\left(\frac{\hat{M}_n}{n} > y_p, \frac{\tilde{U}(a)}{\sigma(a)} \leq 2z\right) \\ &= P\left(\max_{1 \leq l \leq q} (\hat{G}_l)^2 > ny_p, (\sigma(a)P_a^n)^{-1} \sum_{m=1}^q U_m^a \leq z\right) \\ &= P\left(\left\{ \cup_{l=1}^q \{(\hat{G}_l)^2 > ny_p\} \right\} \cap \left\{ (\sigma(a)P_a^n)^{-1} \sum_{m=1}^q U_m^a \leq z \right\}\right). \end{aligned}$$

Define the events  $E_l = \{(\hat{G}_l)^2 > ny_p\} \cap \{(\sigma(a)P_a^n)^{-1} \sum_{m=1}^q U_m^a \leq z\}$ , and then we have

$$\text{(B.2.2)} \quad \text{(B.2.1)} = P(\cup_{l=1}^q E_l).$$

We next examine the upper and lower bounds of (B.2.2). Particularly, using the Bonferroni's inequality, for any even number  $d < [q/2]$ , we obtain

$$\begin{aligned} \text{(B.2.3)} \quad & \sum_{s=1}^d (-1)^{s-1} \sum_{1 \leq l_1 < \dots < l_s \leq q} P(\cap_{t=1}^s E_{l_t}) \leq P(\cup_{l=1}^q E_l) \\ & \leq \sum_{s=1}^{d-1} (-1)^{s-1} \sum_{1 \leq l_1 < \dots < l_s \leq q} P(\cap_{t=1}^s E_{l_t}). \end{aligned}$$

We consider  $d = O(\log^{1/5} p)$  below. The following proof proceeds by examining the upper and lower bounds of  $P(\cap_{t=1}^s E_{l_t})$  first and combining them based on (B.2.3).

To facilitate the discussion, we define some notation. Let

$$H_d = \sum_{s=1}^d (-1)^{s-1} \sum_{1 \leq l_1 < \dots < l_s \leq q} P(\cap_{t=1}^s \{(\hat{G}_{l_t})^2 > ny_p\}).$$

By the Bonferroni's inequality, we have

$$(B.2.4) \quad H_d \leq P(\cup_{l=1}^q \{(\hat{G}_l)^2 > ny_p\}) \leq H_{d-1}.$$

Given  $l_1, \dots, l_s$ , we define two index sets:  $I_s = \{(j_t^1, j_t^2), 1 \leq t \leq s\}$  and correspondingly

$$(B.2.5) \quad L_{I_s} = \{(j_1, j_2) : (j_1, j_2) \cap (u, t) \neq \emptyset, (u, t) \in I_s \text{ and } (j_1, j_2) \in L\},$$

where  $L$  is defined in (A.3.1). (B.2.5) suggests that  $L_{I_s}$  contains all the index pairs that have overlap with the index pairs in  $I_s$ . Note that the definitions of  $I_s$  and  $L_{I_s}$  depend on the given indexes  $l_1, \dots, l_s$ ; for the simplicity of notation, we write  $I_s$  and  $L_{I_s}$  in this proof without ambiguity. It follows that

$$(B.2.6) \quad \sum_{m=1}^q U_m^a = \sum_{(j_l^1, j_l^2) \in L_{I_s}} U_l^a + \sum_{(j_l^1, j_l^2) \in L \setminus L_{I_s}} U_l^a.$$

The cardinality of  $L_{I_s}$  is no greater than  $2ps$  by construction. Furthermore,  $2ps \leq 2pd$  as  $s \leq d$ . Note that the indexes in  $I_s$  and  $L \setminus L_{I_s}$  have no intersection. By this construction and the independence assumption in Condition 2.3, for any finite integers  $a_1, a_2 \geq 1$ , we know

$$\{U_l^{a_1}, (j_l^1, j_l^2) \in I_s\} \quad \text{and} \quad \{U_l^{a_2}, (j_l^1, j_l^2) \in L \setminus L_{I_s}\}$$

are independent.

We next examine the upper bound of  $P(\cap_{t=1}^s E_{l_t})$ . By the definition of  $E_l$  and (B.2.6),

$$(B.2.7) \quad \begin{aligned} & P(\cap_{t=1}^s E_{l_t}) \\ &= P\left(\bigcap_{t=1}^s \left\{ (\sigma(a)P_a^n)^{-1} \sum_{m=1}^q U_m^a \leq z \right\} \cap \{(\hat{G}_{l_t})^2 > ny_p\}\right) \\ &= P\left(\bigcap_{t=1}^s \left\{ (\sigma(a)P_a^n)^{-1} \left[ \sum_{(j_l^1, j_l^2) \in L_{I_s}} U_l^a + \sum_{(j_l^1, j_l^2) \in L \setminus L_{I_s}} U_l^a \right] \leq z \right\} \right. \\ & \quad \left. \cap \{(\hat{G}_{l_t})^2 > ny_p\} \right). \end{aligned}$$

Let  $\Gamma_p$  represent a number of order  $\Theta\{(\log p)^{-1/2}\}$  and we have

$$\begin{aligned} & \left\{ (\sigma(a)P_a^n)^{-1} \left( \sum_{(j_l^1, j_l^2) \in L_{I_s}} U_l^a + \sum_{(j_l^1, j_l^2) \in L \setminus L_{I_s}} U_l^a \right) \leq z \right\} \\ & \subseteq \left\{ (\sigma(a)P_a^n)^{-1} \left| \sum_{(j_l^1, j_l^2) \in L_{I_s}} U_l^a \right| \geq \Gamma_p \right\} \cup \left\{ (\sigma(a)P_a^n)^{-1} \sum_{(j_l^1, j_l^2) \in L \setminus L_{I_s}} U_l^a \leq \Gamma_p + z \right\}. \end{aligned}$$

Thus (B.2.7) has the following upper bound,

$$(B.2.7) \leq P\left(\left\{\cap_{t=1}^s \{(\hat{G}_{l_t})^2 > ny_p\}\right\} \cap \left\{(\sigma(a)P_a^n)^{-1} \left| \sum_{(j_l^1, j_l^2) \in L_{I_s}} U_l^a \right| \geq \Gamma_p\right\}\right) \\ + P\left(\left\{\cap_{t=1}^s \{(\hat{G}_{l_t})^2 > ny_p\}\right\} \cap \left\{(\sigma(a)P_a^n)^{-1} \sum_{(j_l^1, j_l^2) \in L \setminus L_{I_s}} U_l^a \leq \Gamma_p + z\right\}\right).$$

In addition, we note that  $\{\hat{G}_l, (j_l^1, j_l^2) \in I_s\}$  and  $\{U_l^a, (j_l^1, j_l^2) \in L \setminus L_{I_s}\}$  are independent, because of  $I_s \cap (L \setminus L_{I_s}) = \emptyset$  by the construction and the independence assumption in Condition 2.3. It follows that

$$(B.2.8) \quad (B.2.7) \leq P_s + P_{ys}P_{+z},$$

where for simplicity we define

$$(B.2.9) \quad P_s = P\left(\left\{(\sigma(a)P_a^n)^{-1} \left| \sum_{(j_l^1, j_l^2) \in L_{I_s}} U_l^a \right| \geq \Gamma_p\right\}\right), \\ P_{ys} = P\left(\bigcap_{t=1}^s \{(\hat{G}_{l_t})^2 > ny_p\}\right), \\ P_{+z} = P\left(\left\{(\sigma(a)P_a^n)^{-1} \sum_{(j_l^1, j_l^2) \in L \setminus L_{I_s}} U_l^a \leq \Gamma_p + z\right\}\right).$$

Note that although the notation  $P_{ys}$ ,  $P_{+z}$  and  $P_s$  in (B.2.9) suppress their dependence on the specific choice of  $(l_1, \dots, l_s)$ , this will not influence the proof due to the i.i.d. assumption in Condition 2.3.

Similarly we examine the lower bound of  $P(\cap_{t=1}^s E_{l_t})$ . In particular,

$$\left\{(\sigma(a)P_a^n)^{-1} \sum_{(j_l^1, j_l^2) \in L \setminus L_{I_s}} U_l^a \leq z - \Gamma_p\right\} \\ \subseteq \left\{(\sigma(a)P_a^n)^{-1} \left| \sum_{(j_l^1, j_l^2) \in L_{I_s}} U_l^a \right| \geq \Gamma_p\right\} \cup \left\{(\sigma(a)P_a^n)^{-1} \sum_{m=1}^q U_m^a \leq z\right\}.$$

Then (B.2.7) has the following lower bound,

$$(B.2.7) \geq -P\left(\left\{\cap_{t=1}^s \{(\hat{G}_{l_t})^2 > ny_p\}\right\} \cap \left\{(\sigma(a)P_a^n)^{-1} \left| \sum_{(j_l^1, j_l^2) \in L_{I_s}} U_l^a \right| \geq \Gamma_p\right\}\right) \\ + P\left(\left\{\cap_{t=1}^s \{(\hat{G}_{l_t})^2 > ny_p\}\right\} \cap \left\{(\sigma(a)P_a^n)^{-1} \sum_{(j_l^1, j_l^2) \in L \setminus L_{I_s}} U_l^a \leq z - \Gamma_p\right\}\right).$$

Similarly to (B.2.8), by the independence between  $\{\hat{G}_l, (j_l^1, j_l^2) \in I_s\}$  and  $\{U_l^a, (j_l^1, j_l^2) \in L \setminus L_{I_s}\}$ , we obtain

$$(B.2.10) \quad (B.2.7) \geq P_{y_s} \times P_{-z} - P_s,$$

where  $P_{y_s}$  and  $P_s$  are defined same as in (B.2.9), and we define

$$P_{-z} = P\left((\sigma(a)P_a^n)^{-1} \sum_{(j_l^1, j_l^2) \in L \setminus L_{I_s}} U_l^a \leq z - \Gamma_p\right).$$

We have obtained the upper and lower bounds of  $P(\cap_{t=1}^s E_{l_t})$  in (B.2.8) and (B.2.10) respectively. We next prove that  $P_{+z}$  in (B.2.8) and  $P_{-z}$  in (B.2.10) are close in the sense that there exists some constant  $C > 0$ ,

$$(B.2.11) \quad |P_{+z} - P_z| \leq C \times \Gamma_p \quad \text{and} \quad |P_{-z} - P_z| \leq C \times \Gamma_p,$$

where we define  $P_z = P((\sigma(a)P_a^n)^{-1} \sum_{m=1}^q U_m^a \leq z)$ . To obtain (B.2.11), we note that  $\sum_{(j_l^1, j_l^2) \in L_{I_s}} U_l^a$  is a summation over index pairs in  $L_{I_s}$ , and  $L_{I_s}$  is of size  $2ps$ , which is  $o(p^2)$  as  $s \leq d$  and  $d = O(\log^5 p)$ . Following similar analysis of  $\tilde{U}^*(a)/\sigma(a) \xrightarrow{P} 0$  in Lemma A.2.1, we know  $(\sigma(a)P_a^n)^{-1} \sum_{(j_l^1, j_l^2) \in L_{I_s}} U_l^a \xrightarrow{P} 0$ . Moreover, by  $\tilde{U}(a) = 2(P_a^n)^{-1} \sum_{l=1}^q U_l^a$  in (A.3.2),  $\Gamma_p = \Theta(\log^{-1/2} p)$  and the convergence result in (A.2.4), we have for given  $z$ ,

$$|P_{+z} - \Phi(2z + 2\Gamma_p)| \leq C\Gamma_p, \quad |P_{-z} - \Phi(2z - 2\Gamma_p)| \leq C\Gamma_p, \quad |P_z - \Phi(2z)| \leq C\Gamma_p.$$

As  $|\Phi(2z + 2\Gamma_p) - \Phi(2z)| \leq C\Gamma_p$  for given  $z$ ,  $|P_{+z} - P_z| \leq |P_{+z} - \Phi(2z + 2\Gamma_p)| + |\Phi(2z + 2\Gamma_p) - \Phi(2z)| + |P_z - \Phi(2z)| \leq C\Gamma_p$ . Similarly, as  $|\Phi(2z - 2\Gamma_p) - \Phi(2z)| \leq C\Gamma_p$ ,  $|P_{-z} - P_z| \leq C\Gamma_p$ . Therefore (B.2.11) is obtained.

In summary, given (B.2.8), (B.2.10) and (B.2.11), we have

$$|P(\cap_{t=1}^s E_{l_t}) - P_{y_s} \times P_z| \leq P_s + C \times \Gamma_p \times P_{y_s}.$$

Given the above property of  $P(\cap_{t=1}^s E_{l_t})$ , we next derive an upper bound of (B.2.2) based on the relationship in (B.2.3). Specifically,

$$\begin{aligned} & P(\cup_{l=1}^q E_l) \\ & \leq \sum_{s=1}^{d-1} (-1)^{s-1} \sum_{1 \leq l_1 < \dots < l_s \leq q} P(\cap_{t=1}^s E_{l_t}) \\ & \leq \sum_{s=1}^{d-1} (-1)^{s-1} \sum_{1 \leq l_1 < \dots < l_s \leq q} \{P_{y_s} P_z + (-1)^{s-1} \times [C\Gamma_p \times P_{y_s} + P_s]\} \\ (B.2.12) \quad & \leq H_{d-1} \times P_z + \sum_{s=1}^{d-1} \sum_{1 \leq l_1 < \dots < l_s \leq q} (C \times \Gamma_p \times P_{y_s} + P_s), \end{aligned}$$

where the last inequality uses the notation in (B.2.4), that is,

$$(B.2.13) \quad H_{d-1} = \sum_{s=1}^{d-1} (-1)^{s-1} \sum_{1 \leq l_1 < \dots < l_s \leq q} P_{y_s},$$

and the fact that  $P_z$  does not depend on  $l_1, \dots, l_s$  in summation. From (B.2.4), we know  $H_{d-1} \leq P_y + |H_{d-1} - H_d|$ , where we define

$$(B.2.14) \quad P_y = P\left(\bigcup_{t=1}^q \{(\hat{G}_t)^2 > ny_p\}\right).$$

As a result, we have

$$(B.2.12) \leq P_y \times P_z + |H_{d-1} - H_d| \times P_z + \sum_{s=1}^{d-1} \sum_{1 \leq l_1 < \dots < l_s \leq q} (C\Gamma_p P_{y_s} + P_s).$$

Next we prove  $|H_{d-1} - H_d| \times P_z \rightarrow 0$ ,  $\sum_{s=1}^{d-1} \sum_{1 \leq l_1 < \dots < l_s \leq q} \Gamma_p \times P_{y_s} \rightarrow 0$  and  $\sum_{s=1}^{d-1} \sum_{1 \leq l_1 < \dots < l_s \leq q} P_s \rightarrow 0$  by the following three Lemmas B.2.1–B.2.3, respectively.

LEMMA B.2.1. *Under the conditions of Theorem 2.3, when  $s = O(\log^{1/5} p)$ ,*

$$\begin{aligned} & \sum_{1 \leq l_1 < \dots < l_s \leq q} P\left(\bigcap_{t=1}^s \{(\hat{G}_{l_t})^2/n \geq 4 \log p - \log \log p + y\}\right) \\ &= \frac{1}{s!} \left(\frac{1}{2\sqrt{2\pi}} e^{-\frac{y}{2}}\right)^s (1 + o(1)) + o(1). \end{aligned}$$

PROOF. See Section B.2.2 on Page 83.  $\square$

LEMMA B.2.2. *Under the conditions of Theorem 2.3, when  $d = O(\log^{1/5} p)$ ,*

$$\begin{aligned} & \sum_{s=1}^{d-1} \sum_{1 \leq l_1 < \dots < l_s \leq q} P\left(\bigcap_{t=1}^s \{(\hat{G}_{l_t})^2/n \geq 4 \log p - \log \log p + y\}\right) \\ &= \sum_{s=1}^{d-1} \frac{1}{s!} \left(\frac{1}{2\sqrt{2\pi}} e^{-y/2}\right)^s \{1 + o(1)\} + o(1). \end{aligned}$$

PROOF. See Section B.2.3 on Page 89.  $\square$

LEMMA B.2.3. *Under the conditions of Theorem 2.3,*

$$\sum_{s=1}^{d-1} \sum_{1 \leq l_1 < \dots < l_s \leq q} P\left(\left\{(\sigma(a)P_a^n)^{-1} \left| \sum_{(j_l^1, j_l^2) \in L_{I_s}} U_l^a \right| \geq \Gamma_p\right\}\right) \rightarrow 0,$$

where  $L_{I_s}$  is defined in (B.2.5),  $d = O(\log^{1/5} p)$ ,  $q = \binom{p}{2}$  and  $\Gamma_p = \Theta(\log^{-1/2} p)$ .

PROOF. See Section B.2.4 on Page 89.  $\square$

First, we show  $|H_{d-1} - H_d| \times P_z \rightarrow 0$ . By Lemma B.2.1, when  $d \rightarrow \infty$ ,

$$\begin{aligned} |H_{d-1} - H_d| &= \sum_{1 \leq l_1 < \dots < l_d \leq q} P\left(\bigcap_{t=1}^d \{(\hat{G}_{l_t})^2 > ny_p\}\right) \\ &\leq C \frac{1}{d!} \left(\frac{1}{2\sqrt{2\pi}} e^{-y/2}\right)^d \leq Ce \times \left(\frac{e^{1-y/2}}{2\sqrt{2\pi}d}\right)^d \rightarrow 0, \end{aligned}$$

where the last inequality follows from  $d! \geq e(d/e)^d$ . Second, we show that  $\sum_{s=1}^{d-1} \sum_{1 \leq l_1 < \dots < l_s \leq q} \Gamma_p P_{ys} \rightarrow 0$ . By the definition of  $P_{ys}$  in (B.2.9), and Lemma B.2.1,  $\sum_{s=1}^{d-1} \sum_{1 \leq l_1 < \dots < l_s \leq q} \Gamma_p P_{ys} = \Gamma_p \sum_{s=1}^{d-1} \frac{1}{s!} \left(\frac{1}{2\sqrt{2\pi}} e^{-y/2}\right)^s + o(1) \rightarrow 0$ , where we use  $\Gamma_p = \Theta(\log^{-1/2} p) \rightarrow 0$  and  $\sum_{s=1}^{d-1} \frac{1}{s!} \left(\frac{1}{2\sqrt{2\pi}} e^{-y/2}\right)^s < \infty$  from  $s! \geq e(s/e)^s$ . Third, we obtain  $\sum_{s=1}^{d-1} \sum_{1 \leq l_1 < \dots < l_s \leq q} P_s \rightarrow 0$  directly from Lemma B.2.3 following the notation  $P_s$  in (B.2.9).

In summary, the analysis above shows that  $P(\cup_{l=1}^q E_l) \leq P_y \times P_z + o(1)$ . On the other hand, following similar arguments, we can obtain  $P(\cup_{l=1}^q E_l) \geq P_y \times P_z + o(1)$ . Therefore,  $|P(\cup_{l=1}^q E_l) - P_y \times P_z| \rightarrow 0$  is obtained, that is,

$$\left| P(\cup_{l=1}^q E_l) - P(\cup_{l=1}^q \{(\hat{G}_l)^2 > ny_p\}) P\left(\left\{(\sigma(a)P_a^n)^{-1} \sum_{m=1}^q U_m^a \leq z\right\}\right) \right| \rightarrow 0.$$

Recall the notation in (B.2.1) and (B.2.2). We then know Lemma A.3.1 is proved for  $m = 1$ .

*B.2.1.2. Proof for  $m > 1$ .* We still use the notation defined in Section A.3, where  $U_l^{a_r}$  and  $\tilde{U}(a_r)$  for  $r = 1, \dots, m$  follow the definitions in (A.3.2) and (2.5) respectively. To prove Lemma A.3.1 for  $m > 1$ , we note that similarly to (B.2.2), we can write

$$(B.2.15) \quad P\left(\frac{\hat{M}_n}{n} > y_p, \frac{\tilde{U}(a_1)}{\sigma(a_1)} \leq 2z_1, \dots, \frac{\tilde{U}(a_m)}{\sigma(a_m)} \leq 2z_m\right) = P(\cup_{l=1}^q E_l),$$



where we redefine the events

$$E_l = \bigcap_{r=1}^m \left\{ (\sigma(a_r)P_{a_r}^n)^{-1} \sum_{v=1}^q U_v^{a_r} \leq z_r \right\} \cap \{(\hat{G}_l)^2 > ny_p\}.$$

It follows that (B.2.3) and (B.2.4) still hold. For given  $l_1, \dots, l_s$ , we define  $I_s$  and  $L_{I_s}$  same as in (B.2.5). Then for  $r = 1, \dots, m$ , we write

$$\sum_{v=1}^q U_v^{a_r} = \sum_{(j_l^1, j_l^2) \in L_{I_s}} U_l^{a_r} + \sum_{(j_l^1, j_l^2) \in L \setminus L_{I_s}} U_l^{a_r}.$$

By the construction of  $L_{I_s}$  and the independence assumption in Condition 2.3, we know

$$\bigcup_{r=1}^m \{U_l^{a_r}, (j_l^1, j_l^2) \in I_s\} \quad \text{and} \quad \bigcup_{r=1}^m \{U_l^{a_r}, (j_l^1, j_l^2) \in L \setminus L_{I_s}\}$$

are independent.

Similarly to (B.2.7), given  $l_1, \dots, l_s$ , we have

$$\begin{aligned} \text{(B.2.16)} \quad & P(\bigcap_{t=1}^s E_{l_t}) \\ &= P\left(\bigcap_{r=1}^m \left\{ (\sigma(a_r)P_{a_r}^n)^{-1} \left[ \sum_{(j_l^1, j_l^2) \in L_{I_s}} U_l^{a_r} + \sum_{(j_l^1, j_l^2) \in L \setminus L_{I_s}} U_l^{a_r} \right] \leq z_r \right\} \right. \\ & \quad \left. \cap \{ \bigcap_{t=1}^s \{(\hat{G}_{l_t})^2 > ny_p\} \} \right). \end{aligned}$$

We take  $\Gamma_p$  same as in Section B.2.1.1 with  $\Gamma_p = \Theta\{(\log p)^{-1/2}\}$ . Then for each  $r = 1, \dots, m$ , we have

$$\begin{aligned} & \left\{ (\sigma(a_r)P_{a_r}^n)^{-1} \left[ \sum_{(j_l^1, j_l^2) \in L_{I_s}} U_l^{a_r} + \sum_{(j_l^1, j_l^2) \in L \setminus L_{I_s}} U_l^{a_r} \right] \leq z_r \right\} \\ \subseteq & \left\{ (\sigma(a_r)P_{a_r}^n)^{-1} \left| \sum_{(j_l^1, j_l^2) \in L_{I_s}} U_l^{a_r} \right| \geq \Gamma_p \right\} \cup \left\{ (\sigma(a_r)P_{a_r}^n)^{-1} \sum_{(j_l^1, j_l^2) \in L \setminus L_{I_s}} U_l^{a_r} \leq \Gamma_p + z_r \right\}, \end{aligned}$$

and

$$\begin{aligned} & \left\{ (\sigma(a_r)P_{a_r}^n)^{-1} \sum_{(j_l^1, j_l^2) \in L \setminus L_{I_s}} U_l^{a_r} \leq z_r - \Gamma_p \right\} \\ \subseteq & \left\{ (\sigma(a_r)P_{a_r}^n)^{-1} \left| \sum_{(j_l^1, j_l^2) \in L_{I_s}} U_l^{a_r} \right| \geq \Gamma_p \right\} \cup \left\{ (\sigma(a_r)P_{a_r}^n)^{-1} \sum_{v=1}^q U_v^{a_r} \leq z_r \right\}. \end{aligned}$$

Therefore similarly to (B.2.8) and (B.2.10), we know

$$(B.2.17) \quad (B.2.16) \leq P_{ys}P_{+z} + \sum_{r=1}^m P_{s_r}, \quad (B.2.16) \geq P_{ys}P_{-z} - \left( \sum_{r=1}^m P_{s_r} \right),$$

where  $P_{ys}$  is defined in (B.2.9), and we further define

$$\begin{aligned} P_{+z} &= P\left(\bigcap_{r=1}^m \left\{ (\sigma(a_r)P_{a_r}^n)^{-1} \sum_{(j_l^1, j_l^2) \in L \setminus L_{I_s}} U_l^{a_r} \leq z_r + \Gamma_p \right\}\right), \\ P_{s_r} &= P\left(\left| (\sigma(a_r)P_{a_r}^n)^{-1} \sum_{(j_l^1, j_l^2) \in L_{I_s}} U_l^{a_r} \right| \geq \Gamma_p\right), \\ P_{-z} &= P\left(\bigcap_{r=1}^m \left\{ (\sigma(a_r)P_{a_r}^n)^{-1} \sum_{(j_l^1, j_l^2) \in L \setminus L_{I_s}} U_l^{a_r} \leq z_r - \Gamma_p \right\}\right). \end{aligned}$$

We note that the cardinality of  $L_{I_s}$  is no greater than  $2ps$ , which is  $o(p^2)$ . Similarly to Section B.2.1.1, we know  $(\sigma(a_r)P_{a_r}^n)^{-1} \times \sum_{(j_l^1, j_l^2) \in L \setminus L_{I_s}} U_l^{a_r} \xrightarrow{P} 0$  for  $r = 1, \dots, m$ . Combined with Theorem 2.1, we know  $\{(\sigma(a_r)P_{a_r}^n)^{-1} \times \sum_{(j_l^1, j_l^2) \in L \setminus L_{I_s}} U_l^{a_r} : r = 1, \dots, m\}$  converges to  $\mathcal{N}(0, I_m)$  and thus are asymptotically independent. We then have

$$(B.2.18) \quad \left| P_{+z} - \prod_{r=1}^m P_{+z_r} \right| \rightarrow 0, \quad \left| P_{-z} - \prod_{r=1}^m P_{-z_r} \right| \rightarrow 0,$$

where we define

$$\begin{aligned} P_{+z_r} &= P\left(\left(\sigma(a_r)P_{a_r}^n\right)^{-1} \sum_{(j_l^1, j_l^2) \in L \setminus L_{I_s}} U_l^{a_r} \leq z_r + \Gamma_p\right), \\ P_{-z_r} &= P\left(\left(\sigma(a_r)P_{a_r}^n\right)^{-1} \sum_{(j_l^1, j_l^2) \in L \setminus L_{I_s}} U_l^{a_r} \leq z_r - \Gamma_p\right). \end{aligned}$$

Similarly to (B.2.11), for each  $r = 1, \dots, m$ , we have

$$(B.2.19) \quad |P_{+z_r} - P_{z_r}| \leq C\Gamma_p \quad \text{and} \quad |P_{-z_r} - P_{z_r}| \leq C\Gamma_p,$$

where we define  $P_{z_r} = P((\sigma(a_r)P_{a_r}^n)^{-1} \sum_{v=1}^q U_v^{a_r} \leq z_r)$ . Combining (B.2.18) and (B.2.19), we have

$$\left| P_{+z} - \prod_{r=1}^m P_{z_r} \right| \rightarrow 0 \quad \text{and} \quad \left| P_{-z} - \prod_{r=1}^m P_{z_r} \right| \rightarrow 0.$$

By (B.2.17) and (B.2.19),

$$(B.2.20) \quad \left| (B.2.16) - P_{ys} \prod_{r=1}^m P_{z_r} \right| \leq o(1)P_{ys} + \sum_{r=1}^m P_{s_r}.$$

Given (B.2.20), similarly to (B.2.12), we have

$$\begin{aligned} & P(\cup_{l=1}^q E_l) \\ & \leq \sum_{s=1}^{d-1} (-1)^{s-1} \sum_{1 \leq l_1 < \dots < l_s \leq q} \left\{ P_{ys} \prod_{r=1}^m P_{z_r} + (-1)^{s-1} \times \left[ o(1)P_{ys} + \sum_{r=1}^m P_{s_r} \right] \right\} \\ & \leq H_{d-1} \prod_{r=1}^m P_{z_r} + \sum_{s=1}^{d-1} \sum_{1 \leq l_1 < \dots < l_s \leq q} \left\{ o(1)P_{ys} + \sum_{r=1}^m P_{s_r} \right\} \\ & \leq P_y \prod_{r=1}^m P_{z_r} + |H_{d-1} - H_d| \prod_{r=1}^m P_{z_r} + \sum_{s=1}^{d-1} \sum_{1 \leq l_1 < \dots < l_s \leq q} \left\{ o(1)P_{ys} + \sum_{r=1}^m P_{s_r} \right\}, \end{aligned}$$

where  $H_{d-1}$  follows the definition in (B.2.13) and we use (B.2.4) and the definition (B.2.14) in the last inequality. By Lemma B.2.1,  $|H_{d-1} - H_d| \rightarrow 0$ ; by Lemma B.2.2,  $o(1) \sum_{s=1}^{d-1} \sum_{1 \leq l_1 < \dots < l_s \leq q} P_{ys} \rightarrow 0$ ; by Lemma B.2.3,  $\sum_{r=1}^m \sum_{s=1}^{d-1} \sum_{1 \leq l_1 < \dots < l_s \leq q} P_{s_r} \rightarrow 0$ .

In summary, we have shown that  $P(\cup_{l=1}^q E_l) \leq P_y \times \prod_{r=1}^m P_{z_r} + o(1)$ . Moreover, following similar arguments, we have  $P(\cup_{l=1}^q E_l) \geq P_y \times \prod_{r=1}^m P_{z_r} + o(1)$ . Therefore,  $|P(\cup_{l=1}^q E_l) - P_y \times \prod_{r=1}^m P_{z_r}| \rightarrow 0$  is obtained, that is,

$$\left| P(\cup_{l=1}^q E_l) - P(\cup_{l=1}^q \{(\hat{G}_l)^2 > ny_p\}) \prod_{r=1}^m P((\sigma(a_r)P_{a_r}^n)^{-1} \sum_{v=1}^q U_v^{a_r} \leq z_r) \right| \rightarrow 0.$$

Since (B.2.15) =  $P(\cup_{l=1}^q E_l)$ ,  $\{\hat{M}_n/n > y_p\} = \cup_{l=1}^q \{(\hat{G}_l)^2 > ny_p\}$  and  $\tilde{\mathcal{U}}(a_r) = 2(P_{a_r}^n)^{-1} \sum_{v=1}^q U_v^{a_r}$ , we know Lemma A.3.1 is proved for  $m > 1$ .

**B.2.2. Proof of Lemma B.2.1 (on Page 79, Section B.2.1).** In this section, we prove Lemma B.2.1. The proof will use Lemmas B.2.2.1 and B.2.2.2, which will be presented and proved in Sections B.2.2.1 and B.2.2.2, respectively.

**PROOF.** Following the definitions in (A.3.3),  $\hat{G}_l$  will not change if  $x_{i,j}$  is scaled by its standard deviation  $\sigma_{j,j}$ . Thus in the discussion below, we assume without loss of generality that  $\sigma_{j,j} = 1$ ,  $j = 1, \dots, p$  for the simplicity of representation.

Given  $i$  and  $1 \leq l_1 < \dots < l_s \leq q$ , we define  $\check{\mathcal{X}}_{i,j_{l_t}^1,j_{l_t}^2} = x_{i,j_{l_t}^1} x_{i,j_{l_t}^2} \times \mathbf{1}\{|x_{i,j_{l_t}^1} x_{i,j_{l_t}^2}| \leq \tau_n\}$  for  $t = 1, \dots, s$ ,  $\mathbf{W}_i = (\check{\mathcal{X}}_{i,j_{l_1}^1,j_{l_1}^2}, \dots, \check{\mathcal{X}}_{i,j_{l_s}^1,j_{l_s}^2})^\top$ , and let  $|\mathbf{W}_i|_{\min}$  denote the minimum absolute value of the entries in the vector  $\mathbf{W}_i$ . It follows that  $P(\cap_{t=1}^s \{(\hat{G}_{l_t})^2/n \geq 4 \log p - \log \log p + y\}) = P(|\sum_{i=1}^n \mathbf{W}_i|_{\min} \geq \sqrt{n} y_p^{1/2})$ , where  $y_p$  is defined in (A.3.4).

We prove Lemma B.2.1 through examining  $\mathbf{W}_i$ ,  $i = 1, \dots, n$ . Since  $\mathbf{W}_i$ 's are independent and identically distributed random vectors,  $\text{cov}(\sum_{i=1}^n \mathbf{W}_i) = n \times \text{cov}(\mathbf{W}_1)$ . We apply Theorem 1.1 in [30] and obtain

$$(B.2.21) \quad \begin{aligned} & P\left(\left|\sum_{i=1}^n \mathbf{W}_i\right|_{\min} \geq \sqrt{n} y_p^{1/2}\right) \\ & \leq P\left(|\mathbf{N}_s|_{\min} \geq \sqrt{n} y_p^{1/2} - \epsilon \sqrt{n} (\log p)^{-1/2}\right) + \\ & \quad c_1 s^{5/2} \exp\left(-\frac{n^{1/2} \epsilon}{c_2 s^{5/2} \tau_n (\log p)^{1/2}}\right), \end{aligned}$$

where  $c_1$  and  $c_2$  are positive constants;  $\epsilon \rightarrow 0$ , which will be specified later; and  $\mathbf{N}_s := (N_{l_1}, \dots, N_{l_s})^\top$  follows multivariate normal distribution with  $E(\mathbf{N}_s) = 0$  and  $\text{cov}(\mathbf{N}_s) = \text{cov}(\sum_{i=1}^n \mathbf{W}_i) = n \times \text{cov}(\mathbf{W}_1)$ . Moreover, we apply Theorem 1.1 in [30] in terms of lower bound and obtain

$$\begin{aligned} & P\left(\left|\sum_{i=1}^n \mathbf{W}_i\right|_{\min} \geq \sqrt{n} y_p^{1/2}\right) \\ & \geq P\left(|\mathbf{N}_s|_{\min} \geq \sqrt{n} y_p^{1/2} + \epsilon \sqrt{n} (\log p)^{-1/2}\right) - c_1 s^{5/2} \exp\left(-\frac{n^{1/2} \epsilon}{c_2 s^{5/2} \tau_n (\log p)^{1/2}}\right). \end{aligned}$$

As  $s = O(\log^{1/5} p)$ ,  $\log p = o(n^{1/7})$ , and  $\tau_n = \tau \log(p + n)$ , when  $\epsilon \rightarrow 0$  sufficiently slow, there exists a constant  $M > 0$  such that

$$c_1 s^{5/2} \exp\left(-\frac{\epsilon n^{1/2}}{c_2 s^{5/2} \tau_n (\log p)^{1/2}}\right) = O(1) e^{-M n^{3/14}}.$$

Therefore, for  $s = O(\log^{1/5} p)$ ,

$$(B.2.22) \quad \begin{aligned} & \sum_{1 \leq l_1 < \dots < l_s \leq q} c_1 s^{5/2} \exp\left(-\frac{\epsilon n^{1/2}}{c_2 s^{5/2} \tau_n (\log p)^{1/2}}\right) \\ & = O(1) q^s \times e^{-M n^{3/14}} = O(1) e^{-M n^{3/14} + 2s \log p} = o(1). \end{aligned}$$

In summary, by (B.2.22) and Lemma B.2.4 in Section B.2.2.1 below, Lemma B.2.1 is proved.  $\square$

B.2.2.1. Lemma B.2.4 and its proof.

LEMMA B.2.4. For  $s = O(\log^{1/5} p)$  and  $\mathbf{N}_s$  in (B.2.21),

$$\sum_{1 \leq l_1 < \dots < l_s \leq q} P\left[|\mathbf{N}_s|_{\min} \geq \sqrt{n}\{y_p^{1/2} \pm \epsilon(\log p)^{-1/2}\}\right] \simeq \frac{1}{s!} \left\{ \frac{1}{2\sqrt{2\pi}} \exp\left(-\frac{y}{2}\right) \right\}^s.$$

PROOF. We write  $v_p = y_p^{1/2} \pm \epsilon(\log p)^{-1/2}$ , which represents two numbers in this proof. Since the proof below will be the same for the two numbers respectively, we abuse the use of notation  $v_p$  below.

We define  $\mathbf{U}_s = \text{cov}(\mathbf{W}_1)$ , where  $\mathbf{W}_1$  is defined in Section B.2.2. By the density of multivariate normal,

$$\begin{aligned} & P\left(|\mathbf{N}_s|_{\min} \geq \sqrt{n}(y_p^{1/2} \pm \epsilon(\log p)^{-1/2})\right) \\ &= P\left(\frac{1}{\sqrt{n}}|\mathbf{N}_s|_{\min} \geq y_p^{1/2} \pm \epsilon(\log p)^{-1/2}\right) \\ &= \frac{1}{(2\pi)^{s/2} |\mathbf{U}_s|^{1/2}} \int_{|\mathbf{y}_{\min}| \geq v_p} \exp\left(-\frac{1}{2} \mathbf{y}^\top (\mathbf{U}_s)^{-1} \mathbf{y}\right) d\mathbf{y} \\ \text{(B.2.23)} \quad &= \frac{1}{(2\pi)^{s/2}} \int_{|\mathbf{U}_s^{1/2} \mathbf{z}_{\min}| \geq v_p} \exp\left(-\frac{1}{2} \mathbf{z}^\top \mathbf{z}\right) d\mathbf{z}. \end{aligned}$$

We note that  $\mathbb{Z}_{P,1} \leq \text{(B.2.23)} \leq \mathbb{Z}_{P,1} + \mathbb{Z}_{P,2}$ , where we define

$$\begin{aligned} \mathbb{Z}_{P,1} &= \frac{1}{(2\pi)^{s/2}} \int_{|\mathbf{U}_s^{1/2} \mathbf{z}|_{\min} \geq v_p, |\mathbf{z}|_{\max} \leq 4\sqrt{s \log p}} \exp\left(-\frac{1}{2} \mathbf{z}^\top \mathbf{z}\right) d\mathbf{z}, \\ \mathbb{Z}_{P,2} &= \frac{1}{(2\pi)^{s/2}} \int_{|\mathbf{z}|_{\max} > 4\sqrt{s \log p}} \exp\left(-\frac{1}{2} \mathbf{z}^\top \mathbf{z}\right) d\mathbf{z}. \end{aligned}$$

To prove Lemma B.2.4, we show  $\mathbb{Z}_{P,2} = o(1)\{\frac{1}{\sqrt{2\pi p^2}} e^{-y/2}\}^s$  and  $\mathbb{Z}_{P,1} \simeq \{\frac{1}{\sqrt{2\pi p^2}} e^{-y/2}\}^s$ , respectively in the following.

We first prove  $\mathbb{Z}_{P,2} = o(1)\{\frac{1}{\sqrt{2\pi p^2}} e^{-y/2}\}^s$ . Let  $z \sim \mathcal{N}(0, 1)$ . By the property of standard normal distribution, we have

$$\text{(B.2.24)} \quad P(z > t) \simeq (\sqrt{2\pi}t)^{-1} e^{-t^2/2} \text{ as } t \rightarrow +\infty.$$

It follows that

$$\begin{aligned} \text{(B.2.25)} \quad \mathbb{Z}_{P,2} &= s \times P(|z| > 4\sqrt{s \log p}) \\ &\simeq s \times \frac{2}{\sqrt{2\pi} \times 4\sqrt{s \log p}} \exp(-8s \log p) \\ &= \frac{1}{2\sqrt{2\pi}} \sqrt{\frac{s}{\log p}} \times p^{-8s} = o(1) \left\{ \frac{1}{\sqrt{2\pi p^2}} e^{-y/2} \right\}^s. \end{aligned}$$

Next we prove  $\mathbb{Z}_{P,1} \simeq \left\{ \frac{1}{\sqrt{2\pi p^2}} e^{-y/2} \right\}^s$ . Note that

$$\begin{aligned} \mathbb{Z}_{P,1} &= \frac{1}{(2\pi)^{s/2}} \int_{|\mathbf{z} + (\mathbf{U}_s^{1/2} - I_s)\mathbf{z}|_{\min} \geq v_p, |\mathbf{z}|_{\max} \leq 4\sqrt{s \log p}} \exp\left(-\frac{\mathbf{z}^\top \mathbf{z}}{2}\right) d\mathbf{z} \\ &\leq \frac{1}{(2\pi)^{s/2}} \int_{|\mathbf{z}|_{\min} \geq v_p - |(\mathbf{U}_s^{1/2} - I_s)\mathbf{z}|_{\max}; |\mathbf{z}|_{\max} \leq 4\sqrt{s \log p}} \exp\left(-\frac{\mathbf{z}^\top \mathbf{z}}{2}\right) d\mathbf{y}, \end{aligned}$$

where  $I_s$  represents an identity matrix of size  $s \times s$ . When  $|\mathbf{z}|_{\max} \leq 4\sqrt{s \log p}$ , we have  $|(\mathbf{U}_s^{1/2} - I_s)\mathbf{z}|_{\max} \leq 4Cs\sqrt{s \log p}(p+n)^{-c_0\tau}$  by Lemma B.2.5 in Section B.2.2.2 below. It follows that

$$(B.2.26) \quad \mathbb{Z}_{P,1} \leq \frac{1}{(2\pi)^{s/2}} \int_{|\mathbf{z}|_{\min} \geq \tilde{v}_p} \exp\left(-\frac{\mathbf{z}^\top \mathbf{z}}{2}\right) d\mathbf{y},$$

where we define  $\tilde{v}_p = v_p - 4Cs\sqrt{s \log p}(p+n)^{-c_0\tau}$ . We set  $\tau$  as a sufficiently large constant such that  $s\sqrt{s \log p} = o\{(p+n)^{c_0\tau}\}$ , then  $\tilde{v}_p = 2\sqrt{\log p}\{1 + o(1)\}$ . By (B.2.24) and (B.2.26),

$$\begin{aligned} \mathbb{Z}_{P,1} &\leq \left\{ \frac{2}{\sqrt{2\pi\tilde{v}_p}} \exp(-\tilde{v}_p^2/2) \right\}^s \\ &= \left\{ 2 \frac{1 + o(1)}{\sqrt{2\pi}\sqrt{4 \log p}} \exp\left(-2 \log p + (\log \log p)/2 - y/2 + o(1)\right) \right\}^s \\ &= \left\{ \frac{1}{\sqrt{2\pi p^2}} e^{-y/2} \right\}^s \{1 + o(1)\}. \end{aligned}$$

Similarly, we have

$$\begin{aligned} \mathbb{Z}_{P,1} &\geq \frac{1}{(2\pi)^{s/2}} \int_{|\mathbf{z}|_{\min} \geq v_p + |(\mathbf{U}_s^{1/2} - I_s)\mathbf{z}|_{\max}, |\mathbf{z}|_{\max} \leq 4\sqrt{s \log p}} \exp\left(-\frac{\mathbf{z}^\top \mathbf{z}}{2}\right) d\mathbf{y} \\ &\geq \frac{1}{(2\pi)^{s/2}} \int_{|\mathbf{z}|_{\min} \geq v_p + 4Cs\sqrt{s \log p}(p+n)^{-\tau/2}} \exp\left(-\frac{\mathbf{z}^\top \mathbf{z}}{2}\right) d\mathbf{y} - \mathbb{Z}_{P,2} \\ &= \left\{ \frac{1}{\sqrt{2\pi p^2}} e^{-y/2} \right\}^s \{1 + o(1)\}. \end{aligned}$$

We therefore obtain  $\mathbb{Z}_{P,1} \simeq \left\{ \frac{1}{\sqrt{2\pi p^2}} e^{-y/2} \right\}^s$ .

Since  $\mathbb{Z}_{P,1} \leq (B.2.23) \leq \mathbb{Z}_{P,1} + \mathbb{Z}_{P,2}$ ,  $\mathbb{Z}_{P,1} \simeq \left\{ \frac{1}{\sqrt{2\pi p^2}} e^{-y/2} \right\}^s$  and  $\mathbb{Z}_{P,2} = o(1)\left\{ \frac{1}{\sqrt{2\pi p^2}} e^{-y/2} \right\}^s$ , we obtain (B.2.23)  $\simeq \left\{ \frac{1}{\sqrt{2\pi p^2}} e^{-y/2} \right\}^s$ . It follows that as

$p \rightarrow \infty$  and  $s = O(\log^{1/5} p)$ ,

$$\begin{aligned}
& \sum_{1 \leq l_1 < \dots < l_s \leq q} P\left(|\mathbf{N}_s|_{\min} \geq \sqrt{n}(y_p^{1/2} \pm \epsilon(\log p)^{-1/2})\right) \\
&= \binom{q}{s} \left\{ \frac{1}{\sqrt{2\pi p^2}} \exp(-y/2) \right\}^s \{1 + o(1)\} \quad \left(q = \frac{p(p-1)}{2}\right) \\
&= \frac{1}{s!} \left\{ \frac{1}{2\sqrt{2\pi}} \exp(-y/2) \right\}^s \{1 + o(1)\}.
\end{aligned}$$

□

*B.2.2.2. Lemma B.2.5 and its proof.*

LEMMA B.2.5. *For  $\mathbf{U}_s$  in Section B.2.2.1, there exist some positive constants  $C$  and  $c_0$  such that  $|\mathbf{U}_s^{1/2} - I_s|_{\max} \leq C(p+n)^{-c_0\tau}$ , where  $|\cdot|_{\max}$  represents the element-wise maximum absolute value, and  $\tau$  is the constant satisfying  $\tau_n = \tau \log(p+n)$  from (A.3.3).*

PROOF. Recall that  $\mathbf{U}_s = \text{cov}(\mathbf{W}_1)$  and  $\mathbf{W}_1 = (\check{\mathcal{X}}_{1,j_{l_1}^1,j_{l_1}^2}, \dots, \check{\mathcal{X}}_{1,j_{l_s}^1,j_{l_s}^2})$  for given  $1 \leq l_1 < \dots < l_s \leq q$ , which is defined at the beginning of Section B.2.2. To prove Lemma B.2.5, we prove  $|\mathbf{U}_s - I_s|_{\max} \leq C(p+n)^{-c_0\tau}$  first. Specifically, we show the diagonal and off-diagonal elements of  $\text{cov}(\mathbf{W}_1) - I_s$  are bounded by  $C(p+n)^{-c_0\tau}$  respectively.

First we show for given  $(j_l^1, j_l^2)$ ,  $|\text{var}(\check{\mathcal{X}}_{1,j_l^1,j_l^2}) - 1| \leq C(p+n)^{-c_0\tau}$ . By the independence assumption in Condition 2.3 and  $\sigma_{j,j} = 1$  for  $j = 1, \dots, p$ , we know  $\text{var}(x_{1,j_l^1}x_{1,j_l^2}) = 1$ ; by  $\text{E}(x_{1,j_l^1}x_{1,j_l^2}) = 0$ , we have  $\text{var}(x_{1,j_l^1}x_{1,j_l^2}) = \text{E}\{(x_{1,j_l^1}x_{1,j_l^2})^2\}$ . It follows that

$$\begin{aligned}
(B.2.27) \quad & \left| \text{var}(\check{\mathcal{X}}_{1,j_l^1,j_l^2}) - 1 \right| = \left| \text{var}(\check{\mathcal{X}}_{1,j_l^1,j_l^2}) - \text{var}(x_{1,j_l^1}x_{1,j_l^2}) \right| \\
&= \left| \text{E}\left\{(\check{\mathcal{X}}_{1,j_l^1,j_l^2})^2\right\} - \left\{\text{E}(\check{\mathcal{X}}_{1,j_l^1,j_l^2})\right\}^2 - \text{E}\left\{(x_{1,j_l^1}x_{1,j_l^2})^2\right\} \right| \\
&\leq \left| \text{E}\left\{(\check{\mathcal{X}}_{1,j_l^1,j_l^2})^2\right\} - \text{E}\left\{(x_{1,j_l^1}x_{1,j_l^2})^2\right\} \right| + \left| \text{E}(\check{\mathcal{X}}_{1,j_l^1,j_l^2}) \right|^2,
\end{aligned}$$

where we use  $\text{var}(x_{1,j_l^1}x_{1,j_l^2}) = 1$  in the first equation; and we use the definition of  $\text{var}(\check{\mathcal{X}}_{1,j_l^1,j_l^2})$  and  $\text{var}(x_{1,j_l^1}x_{1,j_l^2}) = \text{E}\{(x_{1,j_l^1}x_{1,j_l^2})^2\}$  in the second equation. Recall the definition  $\check{\mathcal{X}}_{1,j_l^1,j_l^2} = x_{1,j_l^1}x_{1,j_l^2} \times \mathbf{1}\{|x_{1,j_l^1}x_{1,j_l^2}| \leq \tau_n\}$ . We then have

$$\begin{aligned}
(B.2.28) \quad & \left| \text{E}\left\{(x_{1,j_l^1}x_{1,j_l^2})^2\right\} - \text{E}\left\{(\check{\mathcal{X}}_{1,j_l^1,j_l^2})^2\right\} \right| \\
&= \left| \text{E}\left[\left(x_{1,j_l^1}x_{1,j_l^2}\right)^2 \mathbf{1}\{|x_{1,j_l^1}x_{1,j_l^2}| > \tau_n\}\right] \right|,
\end{aligned}$$

and  $|\mathbb{E}(\check{\mathcal{X}}_{1,j_l^1,j_l^2})| = |\mathbb{E}(x_{1,j_l^1}x_{1,j_l^2} \times \mathbf{1}\{|x_{1,j_l^1}x_{1,j_l^2}| > \tau_n\})|$  as  $\mathbb{E}(x_{1,j_l^1}x_{1,j_l^2}) = 0$ . Since  $\mathbf{1}\{|x_{1,j_l^1}x_{1,j_l^2}| > \tau_n\} \leq \mathbf{1}\{|x_{1,j_l^1}| > \sqrt{\tau_n}\} + \mathbf{1}\{|x_{1,j_l^2}| > \sqrt{\tau_n}\}$ , and  $x_{1,j_l^1}$  and  $x_{1,j_l^2}$  are i.i.d. by Condition 2.3, by Hölder's inequality, we know

$$(B.2.29) \quad (B.2.28) \leq C \times \mathbb{E}\left(x_{1,j_l^1}^2 \mathbf{1}\{|x_{1,j_l^1}| > \sqrt{\tau_n}\}\right) \times \mathbb{E}(x_{1,j_l^2}^2) \\ \leq C \times \{\mathbb{E}(x_{1,j_l^1}^4)P(|x_{1,j_l^1}| > \sqrt{\tau_n})\}^{1/2} \times \mathbb{E}(x_{1,j_l^2}^2),$$

and also

$$(B.2.30) \quad \left| \mathbb{E}(\check{\mathcal{X}}_{1,j_l^1,j_l^2}) \right| \leq C \times \{\mathbb{E}(x_{1,j_l^1}^2)P(|x_{1,j_l^1}| > \sqrt{\tau_n})\}^{1/2} \times \mathbb{E}(|x_{1,j_l^2}|).$$

By Markov's inequality,  $P(|x_{1,j_l^1}| > \sqrt{\tau_n}) \leq \mathbb{E}\{\exp(t_0x_{1,j_l^1}^2)\} \exp(-t_0\tau_n)$ , where  $t_0$  is given in Condition 2.3. Combining (B.2.27)–(B.2.30), we obtain that there exists some positive constants  $C$  and  $c_0$  such that

$$(B.2.27) \leq C \times \{\mathbb{E}(\exp(t_0x_{1,j_l^1}^2)) \exp(-t_0\tau_n)\}^{1/2} \leq C(p+n)^{-c_0\tau},$$

where we use the assumption that  $x_{1,j_l^1}$  and  $x_{1,j_l^2}$  are i.i.d. and  $\mathbb{E}\{\exp(t_0x_{1,j_l^1}^2)\} < \infty$  as Condition 2.3 holds for  $\vartheta = 2$ .

Second, we prove that for given  $l_1 \neq l_2$ , there exist some positive constants  $C$  and  $c_0$  such that  $|\text{cov}(\check{\mathcal{X}}_{1,j_{l_1}^1,j_{l_1}^2}, \check{\mathcal{X}}_{1,j_{l_2}^1,j_{l_2}^2})| \leq C(p+n)^{-c_0\tau}$ . We note that under  $H_0$ ,  $\text{cov}(x_{1,j_{l_1}^1}x_{1,j_{l_1}^2}, x_{1,j_{l_2}^1}x_{1,j_{l_2}^2}) = \mathbb{E}(x_{1,j_{l_1}^1}x_{1,j_{l_1}^2}x_{1,j_{l_2}^1}x_{1,j_{l_2}^2}) = 0$  as  $j_{l_1}^1 \neq j_{l_2}^2$  and  $j_{l_1}^1 \neq j_{l_2}^2$ . It follows that

$$\left| \text{cov}(\check{\mathcal{X}}_{1,j_{l_1}^1,j_{l_1}^2}, \check{\mathcal{X}}_{1,j_{l_2}^1,j_{l_2}^2}) \right| \\ = \left| \text{cov}(\check{\mathcal{X}}_{1,j_{l_1}^1,j_{l_1}^2}, \check{\mathcal{X}}_{1,j_{l_2}^1,j_{l_2}^2}) - \mathbb{E}(x_{1,j_{l_1}^1}x_{1,j_{l_1}^2}x_{1,j_{l_2}^1}x_{1,j_{l_2}^2}) \right| \\ \leq \left| \mathbb{E}(\check{\mathcal{X}}_{1,j_{l_1}^1,j_{l_1}^2} \check{\mathcal{X}}_{1,j_{l_2}^1,j_{l_2}^2}) - \mathbb{E}(x_{1,j_{l_1}^1}x_{1,j_{l_1}^2}x_{1,j_{l_2}^1}x_{1,j_{l_2}^2}) \right| + \left| \mathbb{E}(\check{\mathcal{X}}_{1,j_{l_1}^1,j_{l_1}^2}) \times \mathbb{E}(\check{\mathcal{X}}_{1,j_{l_2}^1,j_{l_2}^2}) \right|.$$

By the definition of  $\check{\mathcal{X}}_{1,j_{l_2}^1,j_{l_2}^2}$ ,

$$\left| \mathbb{E}(\check{\mathcal{X}}_{1,j_{l_1}^1,j_{l_1}^2} \check{\mathcal{X}}_{1,j_{l_2}^1,j_{l_2}^2}) - \mathbb{E}(x_{1,j_{l_1}^1}x_{1,j_{l_1}^2}x_{1,j_{l_2}^1}x_{1,j_{l_2}^2}) \right| \\ \leq \left| \mathbb{E}\left[|x_{1,j_{l_1}^1}x_{1,j_{l_1}^2}x_{1,j_{l_2}^1}x_{1,j_{l_2}^2}| \left( \mathbf{1}\{|x_{1,j_{l_1}^1}x_{1,j_{l_1}^2}| > \tau_n\} + \mathbf{1}\{|x_{1,j_{l_2}^1}x_{1,j_{l_2}^2}| > \tau_n\} \right) \right] \right|.$$

Similarly to (B.2.29) and (B.2.30), by Hölder's inequality, we know that there exist some positive constants  $C$  and  $c_0$  such that

$$\left| \mathbb{E}(\check{\mathcal{X}}_{1,j_{l_1}^1,j_{l_1}^2} \check{\mathcal{X}}_{1,j_{l_2}^1,j_{l_2}^2}) - \mathbb{E}(x_{1,j_{l_1}^1}x_{1,j_{l_1}^2}x_{1,j_{l_2}^1}x_{1,j_{l_2}^2}) \right| \leq C(p+n)^{-c_0\tau}, \\ \left| \mathbb{E}(\check{\mathcal{X}}_{1,j_{l_1}^1,j_{l_1}^2}) \times \mathbb{E}(\check{\mathcal{X}}_{1,j_{l_2}^1,j_{l_2}^2}) \right| \leq C(p+n)^{-c_0\tau}.$$



It follows that  $|\text{cov}(\check{\mathcal{X}}_{1,j_{l_1}^1,j_{l_1}^2}, \check{\mathcal{X}}_{1,j_{l_2}^1,j_{l_2}^2})| \leq C(p+n)^{-c_0\tau}$ .

In summary,  $|\mathbf{U}_s - I_s|_{\max} \leq C(p+n)^{-c_0\tau}$  is obtained. By the matrix version Taylor expansion of  $\mathbf{U}_s^{1/2}$  at  $I_s$  [see, e.g., 15], the element wise differences between  $\mathbf{U}_s^{1/2}$  and  $I_s$  are also bounded by  $C(p+n)^{-c_0\tau}$ .  $\square$

**B.2.3. Proof of Lemma B.2.2 (on Page 79, Section B.2.1).** By the proof of Lemma B.2.1 in Section B.2.2, we have

$$\begin{aligned} & \sum_{s=1}^{d-1} \sum_{1 \leq l_1 < \dots < l_s \leq q} P \left[ \bigcap_{t=1}^s \left\{ (\hat{G}_{l_t})^2/n \geq 4 \log p - \log \log p + y \right\} \right] \\ &= \sum_{s=1}^{d-1} \left[ \frac{1}{s!} \left( \frac{1}{2\sqrt{2\pi}} e^{-y/2} \right)^s \{1 + o(1)\} + O(1)e^{-Mn^{3/14} + 2s \log p} \right]. \end{aligned}$$

Since  $\log p = o(1)n^{1/7}$  and  $d = O(\log^{1/5} p)$ , we know  $Mn^{3/14} - 2d \log p - \log d \rightarrow \infty$  and  $\sum_{s=1}^{d-1} O(1)e^{-Mn^{3/14} + 2s \log p} \leq O(1)e^{-Mn^{3/14} + 2d \log p + \log d} = o(1)$ . It follows that

$$\begin{aligned} & \sum_{s=1}^{d-1} \sum_{1 \leq l_1 < \dots < l_s \leq q} P(\cap_{t=1}^s \{(\hat{G}_{l_t})^2/n \geq 4 \log p - \log \log p + y\}) \\ &= \sum_{s=1}^{d-1} \frac{1}{s!} \left( \frac{1}{2\sqrt{2\pi}} e^{-y/2} \right)^s \{1 + o(1)\} + o(1). \end{aligned}$$

**B.2.4. Proof of Lemma B.2.3 (on Page 80, Section B.2.1).**

**PROOF.** Recall the definition of  $U_l^a$  in (A.3.2), and we write  $U_{(j_l^1, j_l^2)}^a = U_l^a$ . By Lemma A.2.1, we know  $\sigma(a)P_a^n = \Theta(pn^{a/2})$ . Then for given  $l_1, \dots, l_s$ ,

$$\begin{aligned} \text{(B.2.31)} \quad & P \left\{ (\sigma(a)P_a^n)^{-1} \left| \sum_{(j_l^1, j_l^2) \in L_{I_s}} U_l^a \right| \geq C\Gamma_p \right\} \\ & \leq P \left\{ \left| n^{-a/2} \sum_{(j_l^1, j_l^2) \in L_{I_s}} U_{(j_l^1, j_l^2)}^a \right| \geq Cp\Gamma_p \right\} \leq P_{U,+} + P_{U,-}, \end{aligned}$$

where we define

$$\begin{aligned} P_{U,+} &= P \left( n^{-a/2} \sum_{(j_l^1, j_l^2) \in L_{I_s}} U_{(j_l^1, j_l^2)}^a \geq Cp\Gamma_p \right), \\ P_{U,-} &= P \left( n^{-a/2} \sum_{(j_l^1, j_l^2) \in L_{I_s}} U_{(j_l^1, j_l^2)}^a \leq -Cp\Gamma_p \right). \end{aligned}$$

By  $q = \binom{p}{2}$ ,

$$(B.2.32) \quad \sum_{s=1}^{d-1} \sum_{1 \leq l_1 < \dots < l_s \leq q} P\left(\left\{(\sigma(a)P_a^n)^{-1} \left| \sum_{(j_l^1, j_l^2) \in L_{I_s}} U_l^a \right| \geq \Gamma_p\right\}\right) \\ \leq dp^{2d} \max_{1 \leq s \leq d-1; 1 \leq l_1 < \dots < l_s \leq q} (P_{U,+} + P_{U,-}).$$

To prove Lemma B.2.3, it suffices to prove that  $P_{U,+}$  and  $P_{U,-}$  are  $o(d^{-1}p^{-2d})$  for each given  $s$  and  $l_1, \dots, l_s$ .

We show  $P_{U,+} = o(d^{-1}p^{-2d})$  in the following, and the same conclusion holds for  $P_{U,-}$  by applying similar analysis. By the construction of  $L_{I_s}$  in (B.2.5) and the i.i.d. assumption in Condition 2.3, we know that there exists an integer  $D \leq 2s$  such that

$$(B.2.33) \quad P_{U,+} \leq \sum_{k=1}^D P\left(\sum_{m=k+1}^p n^{-a/2} U_{(k,m)}^a \geq Cp\Gamma_n/D\right) \\ \leq D \max_{1 \leq k \leq D} \mathbb{E}\left[P_k\left(\sum_{m=k+1}^p n^{-a/2} U_{(k,m)}^a \geq Cp\Gamma_p/D\right)\right],$$

where  $P_k$  represents the probability measure conditioning on  $\{x_{1,k}, \dots, x_{n,k}\}$  with  $k \in \{1, \dots, p\}$ . To prove  $P_{U,+} = o(d^{-1}p^{-2d})$ , in the following we show that  $\mathbb{E}[P_k(\sum_{m=k+1}^p n^{-a/2} U_{(k,m)}^a \geq C \times p\Gamma_p/D)] = o(D^{-1}d^{-1}p^{-2d})$  for  $k = 1$ ; and the same conclusion holds for  $k \geq 2$  by similar analysis given the i.i.d. assumption in Condition 2.3 and  $k \leq D = O(\log^{1/5} p)$ . Specifically, we next prove that  $\mathbb{E}[P_1(\{\sum_{m=2}^p n^{-a/2} U_{(1,m)}^a \geq Cp\Gamma_p/D\})] = o(D^{-1}d^{-1}p^{-2d})$ .

Define

$$(B.2.34) \quad \bar{U}_x = n^{-a} \sum_{1 \leq i_1 \neq \dots \neq i_a \leq n} x_{i_1,1}^2 \dots x_{i_a,1}^2,$$

then  $\mathbb{E}(\bar{U}_x) \leq \{\mathbb{E}(x_{11}^2)\}^a = \Theta(1)$ . Given a constant  $t > 0$ , we define an event  $T_{t,1} = \{|\bar{U}_x - \mathbb{E}(\bar{U}_x)| \leq t\}$ , and let  $\mathbf{1}_{T_{t,1}}$  denote the indicator function of the event  $T_{t,1}$ . It follows that

$$(B.2.35) \quad \mathbb{E}\left[P_1\left(\left\{\sum_{m=2}^p n^{-a/2} U_{(1,m)}^a \geq Cp\Gamma_p/D\right\}\right)\right] \\ = \mathbb{E}\left[P_1\left(\left\{\sum_{m=2}^p n^{-a/2} U_{(1,m)}^a \geq Cp\Gamma_p/D\right\}\right) \times (\mathbf{1}_{T_{t,1}} + \mathbf{1}_{T_{t,1}^c})\right] \\ \leq \mathbb{E}(P_{T_{t,1}}) + P(T_{t,1}^c),$$

where  $\mathbf{1}_{T_{t,1}^c} = 1 - \mathbf{1}_{T_{t,1}}$ ;  $T_{t,1}^c$  denotes the complement set of the event  $T_{t,1}$ ; and  $P_{T_{t,1}} = P_1\{\sum_{m=2}^p n^{-a/2}U_{(1,m)}^a \geq Cp\Gamma_p/D\} \times \mathbf{1}_{T_{t,1}}$ . It remains to prove that  $E(P_{T_{t,1}})$  and  $P(T_{t,1}^c)$  are  $o(D^{-1}d^{-1}p^{-2d})$  respectively.

**Part 1:  $E(P_{T_{t,1}})$**  Given an integer  $a$ , define  $h_p = C(p/\log^2 p)^{a/(a+1)}$ . For easy presentation, we let  $\mathbf{1}_H$  denote an indicator function of the event  $\{|n^{-a/2}U_{(1,m)}^a| \leq h_p\}$ . We next decompose  $n^{-a/2}U_{(1,m)} = z_{m,1} + z_{m,2}$ , where

$$(B.2.36) \quad \begin{aligned} z_{m,1} &= n^{-a/2} \left[ U_{(1,m)}^a \mathbf{1}_H - E_1\{U_{(1,m)}^a \mathbf{1}_H\} \right], \\ z_{m,2} &= n^{-a/2} \left[ E_1\{U_{(1,m)}^a \mathbf{1}_H\} + U_{(1,m)}^a (1 - \mathbf{1}_H) \right] \\ &= n^{-a/2} \left[ -E_1\{U_{(1,m)}^a (1 - \mathbf{1}_H)\} + U_{(1,m)}^a (1 - \mathbf{1}_H) \right]; \end{aligned}$$

in (B.2.36),  $E_1$  denotes the expectation conditioning on  $\{x_{1,1}, \dots, x_{n,1}\}$ , and we use  $E_1\{U_{(1,m)}^a \mathbf{1}_H\} = -E_1\{U_{(1,m)}^a (1 - \mathbf{1}_H)\}$  as  $E_1\{U_{(1,m)}^a\} = 0$ . Given  $n^{-a/2}U_{(1,m)}^a = z_{m,1} + z_{m,2}$ , we have  $P_{T_{t,1}} \leq P_{z,1} + P_{z,2}$ , where we define

$$P_{z,1} = P_1\left(\sum_{m=2}^p z_{m,1} \geq Cp\Gamma_p/D\right) \mathbf{1}_{T_{t,1}}, \quad P_{z,2} = P_1\left(\sum_{m=2}^p z_{m,2} \geq Cp\Gamma_p/D\right) \mathbf{1}_{T_{t,1}}.$$

To evaluate  $E(P_{T_1})$ , we examine  $E(P_{z,1})$  and  $E(P_{z,2})$  respectively below.

**Part 1.1:  $E(P_{z,1})$**  When conditioning on  $\{x_{1,1}, \dots, x_{n,1}\}$ , since  $z_{m,1}$ 's are independent and bounded random variables, by Bernstein inequality,

$$(B.2.37) \quad P_{z,1} \leq C \exp\left(-\frac{Cp^2\Gamma_p^2/D^2}{\sum_{m=2}^p E_1(z_{m,1}^2) + Ch_p p\Gamma_p/D}\right) \mathbf{1}_{T_1}.$$

Note that  $0 \leq E_1(z_{m,1}^2) \leq E_1[\{n^{-a/2}U_{(1,m)}^a\}^2]$  and

$$\begin{aligned} E_1[\{n^{-a/2}U_{(1,m)}^a\}^2] &= n^{-a} \sum_{\substack{1 \leq i_1 \neq \dots \neq i_a \leq n; \\ 1 \leq \tilde{i}_1 \neq \dots \neq \tilde{i}_a \leq n}} \left( \prod_{r=1}^a x_{i_r,1} x_{\tilde{i}_r,1} \right) \times E\left( \prod_{r=1}^a x_{i_r,m} x_{\tilde{i}_r,m} \right) \\ &= a! n^{-a} \sum_{1 \leq i_1 \neq \dots \neq i_a \leq n} \left( \prod_{r=1}^a x_{i_r,1}^2 \right) \times \{E(x_{1,m}^2)\}^a \\ &= a! \bar{U}_x \times \{E(x_{1,m}^2)\}^a, \end{aligned}$$

where from the first equation to the second equation, we use the fact that  $E(\prod_{r=1}^a x_{i_r,m} x_{\tilde{i}_r,m}) \neq 0$  only when  $\{i_1, \dots, i_a\} = \{\tilde{i}_1, \dots, \tilde{i}_a\}$ . It follows that

$\mathbf{E}_1(z_{m,1}^2) \leq C \times \bar{U}_x$ . As  $\mathbf{1}_{T_{i,1}}$  indicates the event  $\{|\bar{U}_x - \mathbf{E}(\bar{U}_x)| \leq t\}$  and  $\mathbf{E}(\bar{U}_x) = \Theta(1)$ , it suffices to consider  $\mathbf{E}_1(z_{m,1}^2) = \Theta(1)$  in (B.2.37) and then

$$(B.2.38) \quad \mathbf{E}(P_{z,1}) \leq \exp\{-Cp\Gamma_p/(Dh_p)\}.$$

**Part 1.2:  $\mathbf{E}(P_{z,2})$**  By the definition of  $z_{m,2}$  in (B.2.36),

$$(B.2.39) \quad \mathbf{E}(P_{z,2}) \leq P\left(\max_{2 \leq m \leq p} |n^{-a/2}U_{(1,m)}^a| > h_p\right) \leq pP(|n^{-a/2}U_{(1,2)}^a| > h_p),$$

where the last inequality follows from the i.i.d. assumption in Condition 2.3. By the result in Section C.1.1, we know  $U_{(1,2)}^a = \sum_{1 \leq i_1 \neq \dots \neq i_a \leq n} \prod_{k=1}^a x_{i_k,1}x_{i_k,2}$  can be written as a linear combination of  $\prod_{k=1}^l \{\sum_{i=1}^n (x_{i,1}x_{i,2})^{a_k}\}$ , where  $a_1, \dots, a_l$  are positive integers such that  $a_1 + \dots + a_l = a$ . It follows that for finite integer  $a$ ,

$$\begin{aligned} & P(|n^{-a/2}U_{(1,2)}^a| > h_p) \\ & \leq \sum_{a_1 + \dots + a_l = a} P\left(n^{-a/2} \prod_{k=1}^l \left| \sum_{i=1}^n (x_{i,1}x_{i,2})^{a_k} \right| > Ch_p\right). \\ & \leq \sum_{a_1 + \dots + a_l = a} \sum_{k=1}^l P\left(\sum_{i=1}^n |x_{i,1}x_{i,2}/\sqrt{n}|^{a_k} > Ch_p^{a_k/a}\right). \end{aligned}$$

*Case 1:* If  $a_k = 1$ , since Condition 2.3 holds for  $\varsigma = 2$  in Theorem 2.2, we know  $x_{i,1}x_{i,2}$ ,  $i = 1, \dots, n$ , are i.i.d. sub-exponential random variables. By the Bernstein-type inequality of sub-exponential random variables, we have

$$(B.2.40) \quad P\left(\sum_{i=1}^n |x_{i,1}x_{i,2}| > C\sqrt{n}h_p^{1/a}\right) \leq C \exp(-C \min\{Ch_p^{2/a}, C\sqrt{n}h_p^{1/a}\}).$$

*Case 2:* If  $2 \leq a_k \leq a$ , we let  $B_p = Cn^{-1/6}h_p^{2/(3a)}$ . We then decompose  $|x_{i,1}x_{i,2}/\sqrt{n}|^{a_k} = s_i + t_i$ , where we define

$$\begin{aligned} s_i &= |x_{i,1}x_{i,2}/\sqrt{n}|^{a_k} \mathbf{1}_{H_{B_p}} - \mu_i, \quad t_i = |x_{i,1}x_{i,2}/\sqrt{n}|^{a_k} (1 - \mathbf{1}_{H_{B_p}}) + \mu_i, \\ \mathbf{1}_{H_{B_p}} &= \mathbf{1}_{\{|x_{i,1}x_{i,2}/\sqrt{n}| \leq B_p\}}, \quad \mu_i = \mathbf{E}\{|x_{i,1}x_{i,2}/\sqrt{n}|^{a_k} \mathbf{1}_{H_{B_p}}\}. \end{aligned}$$

It follows that

$$P\left(\sum_{i=1}^n |x_{i,1}x_{i,2}/\sqrt{n}|^{a_k} > Ch_p^{a_k/a}\right) \leq P\left(\sum_{i=1}^n s_i > Ch_p^{a_k/a}\right) + P\left(\sum_{i=1}^n t_i > Ch_p^{a_k/a}\right).$$

Since  $|s_i| \leq C \times B_p^{a_k}$  from construction, by Bernstein inequality,

$$(B.2.41) \quad P\left(\sum_{i=1}^n s_i > Ch_p^{a_k/a}\right) \leq C \exp\left(-\frac{Ch_p^{2a_k/a}}{\sum_{i=1}^n \mathbb{E}(s_i^2) + CB_p^{a_k} h_p^{a_k/a}}\right).$$

As  $2 \leq a_k \leq a$ , by Condition 2.3, we have

$$\sum_{i=1}^n \mathbb{E}(s_i^2) \leq \sum_{i=1}^n \mathbb{E}\left\{\left(\frac{x_{i,1}x_{i,2}}{\sqrt{n}}\right)^{2a_k}\right\} \leq \frac{\mathbb{E}\{(x_{1,1}x_{1,2})^{2a_k}\}}{n^{a_k-1}} \leq \mathbb{E}[(x_{1,1}x_{1,2})^{2a_k}] < \infty.$$

Since  $h_p^{1/a}/B_p \rightarrow \infty$ , from (B.2.41), we have

$$(B.2.42) \quad P\left(\sum_{i=1}^n s_i > Ch_p^{a_k/a}\right) \leq \exp(-Ch_p^{2/a}/B_p^2).$$

In addition, by the definition of  $t_i$ ,

$$P\left(\sum_{i=1}^n t_i > Ch_p^{a_k/a}\right) \leq P\left\{\sum_{i=1}^n |x_{i,1}x_{i,2}/\sqrt{n}|^{a_k}(1 - \mathbf{1}_{H_{B_p}}) > Ch_p^{a_k/a} - \left|\sum_{i=1}^n \mu_i\right|\right\}.$$

We note that  $\sum_{i=1}^n \mu_i \leq n^{-1} \times \sum_{i=1}^n [\mathbb{E}\{(x_{1,1}x_{1,2})^{2a_k}\}]^{1/2} < \infty$  by Hölder's inequality and Condition 2.3. As  $h_p \rightarrow \infty$ ,  $Ch_p^{a_k/a} - |\sum_{i=1}^n \mu_i| > 0$  when  $n$  and  $p$  are sufficiently large. Since  $1 - \mathbf{1}_{H_{B_p}}$  indicates  $|x_{i,1}x_{i,2}/\sqrt{n}| > B_p$ ,

$$(B.2.43) \quad \begin{aligned} P\left(\sum_{i=1}^n t_i > Ch_p^{a_k/a}\right) &\leq P\left(\max_{1 \leq i \leq n} |x_{i,1}x_{i,2}/\sqrt{n}|^{a_k} > B_p^{a_k}\right) \\ &\leq n \times P(|x_{1,1}x_{1,2}/\sqrt{n}| > B_p) \\ &\leq n \times \mathbb{E}\{\exp(t_0|x_{1,1}x_{1,2}|)\} / \exp\{t_0(\sqrt{n}B_p)\} \\ &\leq \exp(-C\sqrt{n}B_p + \log n), \end{aligned}$$

where we use  $\mathbb{E}\{\exp(t_0|x_{1,1}x_{1,2}|)\} \leq \mathbb{E}\{\exp(t_0(x_{1,1}^2 + x_{1,2}^2)/2)\} < \infty$  as Condition 2.3 holds for  $\varsigma = 2$ . By (B.2.39), (B.2.40), (B.2.42) and (B.2.43),

$$(B.2.44) \quad \begin{aligned} \mathbb{E}(P_{z,2}) &\leq Cp \times \left[ \exp\left(-C \min\{Ch_p^{2/a}, C\sqrt{n}h_p^{1/a}\}\right) \right. \\ &\quad \left. + \exp(-Ch_p^{2/a}/B_p^2) + \exp(-C\sqrt{n}B_p + \log n) \right]. \end{aligned}$$

**Part 2:  $P(T_{t,1}^c)$**  By the definition in (B.2.35),  $P(T_{t,1}^c) = P(|\bar{U}_x - \mathbb{E}(\bar{U}_x)| > t)$ . Moreover, by the definition in (B.2.34),  $\mathbb{E}(\bar{U}_x) = \Theta(1)$  and  $\bar{U}_x \geq 0$ .

Therefore we know there exist large positive constants  $C$  and  $t$  such that  $\{|\bar{U}_x - \mathbb{E}(\bar{U}_x)| > t\} \subseteq \{\bar{U}_x > Ct\}$  and  $P(T_{t,1}^c) \leq P(\bar{U}_x > Ct)$ . Since  $\bar{U}_x \leq (\sum_{i=1}^n x_{i,1}^2/n)^a$  and  $x_{i,1}^2$  are i.i.d. sub-exponential random variables, we have

$$(B.2.45) \quad P(T_{t,1}^c) \leq P\left\{\left(\sum_{i=1}^n x_{i,1}^2/n\right)^a \geq Ct\right\} = P\left(\sum_{i=1}^n x_{i,1}^2/n \geq Ct^{1/a}\right) \\ \leq C \exp(-Cn),$$

where the last inequality is obtained by the Bernstein-type inequality of sub-exponential random variables.

By the analysis above, (B.2.35)  $\leq \mathbb{E}(P_{z,1}) + \mathbb{E}(P_{z,2}) + P(T_1^c)$ . Recall that  $h_p = C(p/\log^2 p)^{a/(a+1)}$ ,  $\log p = o(n^{1/7})$ ,  $\Gamma_p = \Theta(\log^{-1/2} p)$ ,  $D = O(\log^{1/5} p)$  and  $B_p = Cn^{-1/6}h_p^{2/(3a)}$ . Then combining (B.2.38), (B.2.44) and (B.2.45), we have (B.2.35)  $= o(D^{-1}d^{-1}p^{-2d})$ . Therefore Lemma B.2.3 is proved.  $\square$

**B.2.5. Proof of Lemma A.3.2 (on Page 7, Section A.3).** Similarly to Section B.2.1, we first prove Lemma A.3.2 for  $m = 1$  in Section B.2.5.1 and then for  $m > 1$  in Section B.2.5.2.

**B.2.5.1. Proof for  $m = 1$ .** Specifically, in this section, we prove for finite integer  $a$ ,

$$(B.2.46) \quad \left| P\left(\frac{M_n}{n} > y_p, \frac{\tilde{U}(a)}{\sigma(a)} \leq z\right) - P\left(\frac{M_n}{n} > y_p\right)P\left(\frac{\tilde{U}(a)}{\sigma(a)} \leq z\right) \right| \rightarrow 0.$$

To prove (B.2.46), we start by proving the following two conclusions (B.2.47) and (B.2.48), which suggest that  $M_n$  and  $\hat{M}_n$  have small difference in probability. To be specific, as  $n, p \rightarrow \infty$ ,

$$(B.2.47) \quad |P(M_n/n > y_p) - P(\hat{M}_n/n > y_p)| \rightarrow 0,$$

and

$$(B.2.48) \quad |P(M_n/n > y_p, \tilde{U}(a)/\sigma(a) \leq z) \\ - P(\hat{M}_n/n > y_p, \tilde{U}(a)/\sigma(a) \leq z)| \rightarrow 0.$$

To prove (B.2.47) and (B.2.48), recall that in (A.3.3),  $M_n$  and  $\hat{M}_n$  are defined using  $\tilde{G}_l$  and  $\hat{G}_l$  respectively. We next focus on the difference between  $\tilde{G}_l$  and  $\hat{G}_l$ . Since  $\tilde{G}_l$  and  $\hat{G}_l$  will not change if the data  $x_{i,j}$  is scaled by its standard deviation, then we assume, without loss of generality,  $\sigma_{j,j} = 1$ ,  $j = 1, \dots, p$  in the following discussion.

By the definitions in (A.3.3), we have

$$P\left(\max_{1 \leq l \leq q} |\tilde{G}_l - \hat{G}_l| \geq (\log p)^{-1}\right) \leq P\left(\max_{1 \leq l \leq q} \max_{1 \leq i \leq n} |x_{i,j_l^1} x_{i,j_l^2}| \geq \tau_n\right).$$

Note that  $|x_{i,j_l^1} x_{i,j_l^2}| \leq (x_{i,j_l^1}^2 + x_{i,j_l^2}^2)/2$ . Then

$$\begin{aligned} & P\left(\max_{1 \leq l \leq q} \max_{1 \leq i \leq n} |x_{i,j_l^1} x_{i,j_l^2}| \geq \tau_n\right) \\ & \leq P\left(\max_{1 \leq l \leq q} \max_{1 \leq i \leq n} (x_{i,j_l^1}^2 + x_{i,j_l^2}^2) \geq 2\tau_n\right) \\ \text{(B.2.49)} \quad & \leq P\left(\max_{1 \leq l \leq q} \max_{1 \leq i \leq n} x_{i,j_l^1}^2 \geq \tau_n\right) + P\left(\max_{1 \leq l \leq q} \max_{1 \leq i \leq n} x_{i,j_l^2}^2 \geq \tau_n\right) \end{aligned}$$

$$\begin{aligned} \text{(B.2.50)} \quad & \leq 2P\left(\max_{1 \leq j \leq p} \max_{1 \leq i \leq n} x_{i,j}^2 \geq \tau_n\right) \\ & \leq 2np \max_{1 \leq j \leq p} P(|x_{1,j}^2| \geq \tau_n). \end{aligned}$$

From (B.2.49) to (B.2.50), we use  $\max_{1 \leq l \leq q} x_{i,j_l^k}^2 = \max_{1 \leq j \leq p} x_{i,j}^2$  for each  $i$  and  $k = 1, 2$ . To see this, recall the notation defined in Section A.3 (on Page 6). In particular, subscript  $l$  is defined to indicate a pair of indexes  $(j_l^1, j_l^2)$  with  $1 \leq j_l^1 < j_l^2 \leq p$ . Since  $j_l^1$  and  $j_l^2$  only take values from the range  $\{1, \dots, p\}$ , we know  $\{j_l^k : 1 \leq l \leq q\} \subseteq \{1, \dots, p\}$  for  $k = 1, 2$ , and then  $\max_{1 \leq l \leq q} x_{i,j_l^k}^2 = \max_{1 \leq j \leq p} x_{i,j}^2$ . Moreover, by Condition 2.3 with  $\varsigma = 2$ ,

$$np \max_{1 \leq j \leq p} P(|x_{1,j}^2| \geq \tau_n) \leq Cnp(n+p)^{-\tau} \mathbb{E} \exp(x_{1,1}^2) \rightarrow 0.$$

It follows that  $P(\max_{1 \leq l \leq q} |\tilde{G}_l - \hat{G}_l| \geq (\log p)^{-1}) \rightarrow 0$ . Conditioning on  $\max_{1 \leq l \leq q} |\tilde{G}_l - \hat{G}_l| \leq (\log p)^{-1}$ , by Lemma B.0.3 and  $|\hat{G}_l| \leq \tau_n$ ,

$$\begin{aligned} |M_n - \hat{M}_n| &= \left| \max_{1 \leq l \leq q} (\tilde{G}_l)^2 - \max_{1 \leq l \leq q} (\hat{G}_l)^2 \right| \\ &\leq 2 \max_{1 \leq l \leq q} |\hat{G}_l| \max_{1 \leq l \leq q} |\tilde{G}_l - \hat{G}_l| + \max_{1 \leq l \leq q} |\tilde{G}_l - \hat{G}_l|^2 \\ &\leq 2\tau_n / \log p + (\log p)^{-2}. \end{aligned}$$

Recall that  $\tau_n = O(\log(p+n))$ , then  $|M_n/n - \hat{M}_n/n| \xrightarrow{P} 0$ . Therefore (B.2.47) and (B.2.48) are obtained.

Given (B.2.47) and (B.2.48), we next prove (B.2.46). In particular, we write

$$P\left(\frac{M_n}{n} > y_p, \frac{\tilde{\mathcal{U}}(a)}{\sigma(a)} \leq z\right) - P\left(\frac{M_n}{n} > y_p\right) P\left(\frac{\tilde{\mathcal{U}}(a)}{\sigma(a)} \leq z\right) = \Delta_{P,1} + \Delta_{P,2} + \Delta_{P,3},$$

where we define

$$\begin{aligned}\Delta_{P,1} &= P\left(M_n/n > y_p, \tilde{\mathcal{U}}(a)/\sigma(a) \leq z\right) - P\left(\hat{M}_n/n > y_p, \tilde{\mathcal{U}}(a)/\sigma(a) \leq z\right), \\ \Delta_{P,2} &= P\left(\hat{M}_n/n > y_p, \tilde{\mathcal{U}}(a)/\sigma(a) \leq z\right) - P\left(\hat{M}_n/n > y_p\right) \times P\left(\tilde{\mathcal{U}}(a)/\sigma(a) \leq z\right), \\ \Delta_{P,3} &= P\left(\hat{M}_n/n > y_p\right) \times P\left(\tilde{\mathcal{U}}(a)/\sigma(a) \leq z\right) \\ &\quad - P\left(M_n/n > y_p\right) \times P\left(\tilde{\mathcal{U}}(a)/\sigma(a) \leq z\right).\end{aligned}$$

Note that the left hand side of (B.2.46)  $\leq |\Delta_{p,1}| + |\Delta_{p,2}| + |\Delta_{p,3}|$ . By Lemma A.3.1,  $|\Delta_{p,2}| \rightarrow 0$ ; by (B.2.48),  $|\Delta_{p,1}| \rightarrow 0$ ; by  $|\Delta_{p,3}| \leq |P(\hat{M}_n/n > y_p) - P(M_n/n > y_p)|$  and (B.2.47),  $|\Delta_{p,3}| \rightarrow 0$ . In summary, (B.2.46) is proved.

*B.2.5.2. Proof for  $m > 1$ .* Following the proof in Section B.2.5.1, we know that (B.2.47) still holds and similarly to (B.2.48),

$$\begin{aligned}&|P(M_n/n > y_p, \tilde{\mathcal{U}}(a_1)/\sigma(a_1) \leq z_1, \dots, \tilde{\mathcal{U}}(a_m)/\sigma(a_m) \leq z_m) \\ &\quad - P(\hat{M}_n/n > y_p, \tilde{\mathcal{U}}(a_1)/\sigma(a_1) \leq z_1, \dots, \tilde{\mathcal{U}}(a_m)/\sigma(a_m) \leq z_m)| \rightarrow 0.\end{aligned}$$

Given these results and Lemma A.3.1, we know that Lemma A.3.2 holds for  $m > 1$ , following the arguments in Section B.2.5.1 similarly.

*B.2.6. Proof of Lemma A.3.3 (on Page 8, Section A.3).* Similarly to Section B.2.5, we first prove Lemma A.3.3 for  $m = 1$  in Section B.2.6.1, and then discuss the case for  $m > 1$  in Section B.2.6.2.

*B.2.6.1. Proof for  $m = 1$ .* Specifically, in this section, we prove for finite integer  $a$  and given  $z$ ,

$$\begin{aligned}(B.2.51) \quad &\left|P\left(\frac{\mathcal{U}(a)}{\sigma(a)} \leq z, n\mathcal{U}^2(\infty) > y_p\right) \right. \\ &\quad \left. - P\left(\frac{\mathcal{U}(a)}{\sigma(a)} \leq z\right)P\left(n\mathcal{U}^2(\infty) > y_p\right)\right| \rightarrow 0.\end{aligned}$$

To prove this, we use  $M_n/n$  as an intermediate variable and first show

$$(B.2.52) \quad \left|P\left(\frac{\mathcal{U}(a)}{\sigma(a)} > z, \frac{M_n}{n} > y_p\right) - P\left(\frac{\mathcal{U}(a)}{\sigma(a)} > z\right)P\left(\frac{M_n}{n} > y_p\right)\right| \rightarrow 0.$$



To facilitate the proof, we define some notation. Given small constant  $\epsilon > 0$ ,

$$\begin{aligned} P_{uz} &= P\left(\frac{\mathcal{U}(a)}{\sigma(a)} > z\right), & P_{zy} &= P\left(\frac{\mathcal{U}(a)}{\sigma(a)} > z, \frac{M_n}{n} > y_p\right), \\ P_{uz+\epsilon} &= P\left(\frac{\tilde{\mathcal{U}}(a)}{\sigma(a)} > z + \epsilon\right), & P_{z+\epsilon} &= P\left(\frac{\tilde{\mathcal{U}}(a)}{\sigma(a)} > z + \epsilon, \frac{M_n}{n} > y_p\right), \\ P_{uz-\epsilon} &= P\left(\frac{\tilde{\mathcal{U}}(a)}{\sigma(a)} > z - \epsilon\right), & P_{z-\epsilon} &= P\left(\frac{\tilde{\mathcal{U}}(a)}{\sigma(a)} > z - \epsilon, \frac{M_n}{n} > y_p\right), \\ P_{y_p} &= P\left(\frac{M_n}{n} > y_p\right), \end{aligned}$$

$\Phi(\cdot)$  is the cumulative distribution function of standard normal distribution, and  $\bar{\Phi}(\cdot) = 1 - \Phi(\cdot)$ . Then

$$\begin{aligned} (\text{B.2.52}) &= |P_{zy} - P_{uz} \times P_{y_p}| \\ &\leq |P_{zy} - P_{z+\epsilon}| + |P_{z+\epsilon} - P_{uz+\epsilon}P_{y_p}| + |P_{uz+\epsilon}P_{y_p} - P_{uz}P_{y_p}|. \end{aligned}$$

We next show (B.2.52)  $\rightarrow 0$  by proving the three parts above all converges to 0 respectively.

First we show  $|P_{zy} - P_{z+\epsilon}| \rightarrow 0$ . Note that  $P_{z+\epsilon} \leq P_{zy} \leq P_{z-\epsilon}$ , then  $|P_{zy} - P_{z+\epsilon}| \leq |P_{z-\epsilon} - P_{z+\epsilon}|$ . In addition,

$$\begin{aligned} &|P_{z-\epsilon} - P_{z+\epsilon}| \\ &\leq |P_{z-\epsilon} - P_{uz-\epsilon} \times P_{y_p}| + |P_{uz-\epsilon} \times P_{y_p} - P_{uz+\epsilon} \times P_{y_p}| + |P_{uz+\epsilon} \times P_{y_p} - P_{z+\epsilon}| \\ &\leq o(1) + |P_{uz+\epsilon} - P_{uz-\epsilon}|, \end{aligned}$$

where we use (B.2.46) in the last inequality. Moreover, by the proof of Theorem 2.1 in Section A.2, we know  $\tilde{\mathcal{U}}(a)/\sigma(a) \xrightarrow{D} \mathcal{N}(0, 1)$ . Thus when  $n, p \rightarrow \infty$  and  $\epsilon \rightarrow 0$ ,

$$\begin{aligned} &|P_{uz+\epsilon} - P_{uz-\epsilon}| \\ &\leq |P_{uz+\epsilon} - \bar{\Phi}(z + \epsilon)| + |\bar{\Phi}(z + \epsilon) - \bar{\Phi}(z - \epsilon)| + |P_{uz-\epsilon} - \bar{\Phi}(z - \epsilon)| + o(1) \\ &\rightarrow 0. \end{aligned}$$

Second, we know  $|P_{z+\epsilon} - P_{uz+\epsilon}P_{y_p}| \rightarrow 0$  by (B.2.46). Last, we show  $|P_{uz+\epsilon}P_{y_p} - P_{uz}P_{y_p}| \rightarrow 0$ . By the proof of Theorem 2.1 in Section A.2, we know  $\tilde{\mathcal{U}}(a)/\sigma(a) \xrightarrow{D} \mathcal{N}(0, 1)$ ,  $\{\mathcal{U}(a) - \tilde{\mathcal{U}}(a)/\sigma(a)\} \xrightarrow{P} 0$ , and  $\mathcal{U}(a)/\sigma(a) \xrightarrow{D} \mathcal{N}(0, 1)$ . Thus when  $n, p \rightarrow \infty$  and  $\epsilon \rightarrow 0$ ,

$$\begin{aligned} &|P_{uz+\epsilon}P_{y_p} - P_{uz}P_{y_p}| \\ &\leq |P_{uz+\epsilon} - P_{uz}| \\ &\leq |P_{uz+\epsilon} - \bar{\Phi}(z + \epsilon)| + |\bar{\Phi}(z + \epsilon) - \bar{\Phi}(z)| + |P_{uz} - \bar{\Phi}(z)| + o(1) \\ &\rightarrow 0. \end{aligned}$$

In summary (B.2.52) is proved.

We next prove (B.2.51) similarly to the proof of (B.2.52). Specifically, we write

$$\begin{aligned} & \left| P\left(n\mathcal{U}^2(\infty) > y_p, \frac{\mathcal{U}(a)}{\sigma(a)} \leq z\right) - P\left(n\mathcal{U}^2(\infty) > y_p\right)P\left(\frac{\mathcal{U}(a)}{\sigma(a)} \leq z\right) \right| \\ &= |P_{z0} - P_{y0} \times P_{uz}|, \end{aligned}$$

where we define  $P_{z0} = P(n\mathcal{U}^2(\infty) > y_p, \frac{\mathcal{U}(a)}{\sigma(a)} > z)$  and  $P_{y0} = P(n\mathcal{U}^2(\infty) > y_p)$ . Note that

$$|P_{z0} - P_{y0}P_{uz}| \leq |P_{z0} - P_{zy-\epsilon}| + |P_{zy-\epsilon} - P_{y-\epsilon}P_{uz}| + |P_{y-\epsilon}P_{uz} - P_{y0}P_{uz}|,$$

where

$$\begin{aligned} P_{zy-\epsilon} &= P\left(\frac{M_n}{n} > y_p - \epsilon, \frac{\mathcal{U}(a)}{\sigma(a)} > z\right), & P_{y-\epsilon} &= P\left(\frac{M_n}{n} > y_p - \epsilon\right), \\ P_{zy+\epsilon} &= P\left(\frac{M_n}{n} > y_p + \epsilon, \frac{\mathcal{U}(a)}{\sigma(a)} > z\right), & P_{y+\epsilon} &= P\left(\frac{M_n}{n} > y_p + \epsilon\right). \end{aligned}$$

To prove (B.2.51), we will show  $|P_{z0} - P_{zy-\epsilon}|$ ,  $|P_{zy-\epsilon} - P_{y-\epsilon}P_{uz}|$ , and  $|P_{y-\epsilon}P_{uz} - P_{y0}P_{uz}|$  all converge to 0 respectively.

First we show  $|P_{z0} - P_{zy-\epsilon}| \rightarrow 0$ . Note that  $W_n \xrightarrow{P} 0$  where  $W_n = (n^2\mathcal{U}^2(\infty) - M_n)/n$  by the proof of Theorem 3 in [4]. Then for any  $\epsilon > 0$ ,  $P(|W_n| > \epsilon) \rightarrow 0$ . Since  $P_{zy+\epsilon} - P(|W_n| > \epsilon) \leq P_{z0} \leq P_{zy-\epsilon} + P(|W_n| > \epsilon)$ , we have  $|P_{z0} - P_{zy-\epsilon}| \leq |P_{zy-\epsilon} - P_{zy+\epsilon}| + o(1)$ . Furthermore,

$$\begin{aligned} & |P_{zy-\epsilon} - P_{zy+\epsilon}| \\ & \leq |P_{zy-\epsilon} - P_{y-\epsilon}P_{uz}| + |P_{y-\epsilon}P_{uz} - P_{y+\epsilon}P_{uz}| + |P_{y+\epsilon}P_{uz} - P_{zy+\epsilon}| \rightarrow 0, \end{aligned}$$

where the last equation follows from (B.2.52) and  $|P_{y-\epsilon} - P_{y+\epsilon}| \rightarrow 0$  when  $\epsilon \rightarrow 0$ . Second we know  $|P_{zy-\epsilon} - P_{y-\epsilon}P_{uz}| \rightarrow 0$  by (B.2.52). Last we show  $|P_{y-\epsilon}P_{uz} - P_{y0}P_{uz}| \rightarrow 0$ . In particular, as  $P_{y+\epsilon} - P(|W_n| > \epsilon) \leq P_{y0} \leq P_{y-\epsilon} + P(|W_n| > \epsilon)$  and  $P(|W_n| > \epsilon) \rightarrow 0$ , we have

$$|P_{y-\epsilon}P_{uz} - P_{y0}P_{uz}| \leq |P_{y-\epsilon} - P_{y0}| \leq |P_{y-\epsilon} - P_{y+\epsilon}| + o(1) \rightarrow 0.$$

In summary, Lemma A.3.3 is proved.

*B.2.6.2. Proof for  $m > 1$ .* Note that  $W_n = \{n^2\mathcal{U}^2(\infty) - M_n\}/n \xrightarrow{P} 0$  and  $\tilde{\mathcal{U}}^*(a_r) = \mathcal{U}(a_r) - \tilde{\mathcal{U}}(a_r) \xrightarrow{P} 0$  for each  $r = 1, \dots, m$  as argued in Section A.3. Therefore when  $m$  is finite, the arguments above can be applied to prove Lemma A.3.3 for  $m > 1$  similarly.

### B.3. Lemmas for the proof of Theorem 2.4.

B.3.1. *Proof of Lemma A.4.1 (on Page 8, Section A.4).* We first prove  $\mathbb{V}_{u,1}(a)/\mathbb{E}\{\mathbb{V}_{u,1}(a)\} \xrightarrow{P} 1$ , and it suffices to prove  $\text{var}\{\mathbb{V}_{u,1}(a)\}/\mathbb{E}^2\{\mathbb{V}_{u,1}(a)\} \rightarrow 0$ . By the notation defined at the beginning of Section B, we have

$$\begin{aligned} & \text{var}\{\mathbb{V}_{u,1}(a)\} \\ &= \mathbb{E}\{\mathbb{V}_{u,1}^2(a)\} - \mathbb{E}^2\{\mathbb{V}_{u,1}(a)\} \\ &= \frac{(2a!)^2}{(P^n)^4} \sum_{\substack{\mathbf{i}, \tilde{\mathbf{i}} \in \mathcal{P}(n,a); \\ 1 \leq j_1 \neq j_2 \leq p, \\ 1 \leq j_3 \neq j_4 \leq p}} \left[ \mathbb{E} \left( \prod_{t=1}^a x_{i_t, j_1}^2 x_{i_t, j_2}^2 x_{i_t, j_3}^2 x_{i_t, j_4}^2 \right) - \left\{ \mathbb{E}(x_{1, j_1}^2 x_{1, j_2}^2) \mathbb{E}(x_{1, j_3}^2 x_{1, j_4}^2) \right\}^a \right]. \end{aligned}$$

To evaluate  $\text{var}\{\mathbb{V}_{u,1}(a)\}$ , we consider the summed term in  $\text{var}\{\mathbb{V}_{u,1}(a)\}$ , that is,

$$(B.3.1) \quad \mathbb{E} \left( \prod_{t=1}^a x_{i_t, j_1}^2 x_{i_t, j_2}^2 x_{i_t, j_3}^2 x_{i_t, j_4}^2 \right) - \left\{ \mathbb{E}(x_{1, j_1}^2 x_{1, j_2}^2) \right\}^a \left\{ \mathbb{E}(x_{1, j_3}^2 x_{1, j_4}^2) \right\}^a.$$

When  $\{\mathbf{i}\} \cap \{\tilde{\mathbf{i}}\} = \emptyset$ , (B.3.1) = 0. We then know that (B.3.1)  $\neq 0$  only when  $|\{\mathbf{i}\} \cup \{\tilde{\mathbf{i}}\}| \leq 2a - 1$ . Along with Condition 2.1, we have

$$|\text{var}\{\mathbb{V}_{u,1}(a)\}| \leq Cp^4 n^{-4a} n^{2a-1},$$

which induces  $\text{var}\{\mathbb{V}_{u,1}(a)\} = O(p^4 n^{-2a-1})$ . By (B.1.24) and (B.1.29), we know  $\mathbb{E}\{\mathbb{V}_{u,1}(a)\} = \Theta(p^2 n^{-a})$ . It follows that  $\text{var}\{\mathbb{V}_{c,1}(a)\}/\mathbb{E}^2\{\mathbb{V}_{c,1}(a)\} \rightarrow 0$  as  $n \rightarrow \infty$ .

We next prove  $\mathbb{V}_{u,2}(a)/\mathbb{E}\{\mathbb{V}_{u,1}(a)\} \xrightarrow{P} 0$ . By the Markov's inequality, it suffices to prove  $\mathbb{E}\{\mathbb{V}_{u,2}^2(a)\} = o(1)[\mathbb{E}\{\mathbb{V}_{u,1}(a)\}]^2$ . As  $\mathbb{E}\{\mathbb{V}_{u,1}(a)\} = \Theta(p^2 n^{-a})$ , it is sufficient to prove  $\mathbb{E}\{\mathbb{V}_{u,2}^2(a)\} = o(p^4 n^{-2a})$  below.

We first derive the form of  $\mathbb{V}_{u,2}(a)$ . In particular, when  $a = 1$ ,

$$\begin{aligned} \mathbb{V}_{u,2}(1) &= \mathbb{V}_u(1) - \mathbb{V}_{u,1}(1) \\ &= \frac{1}{n^2} \sum_{1 \leq j_1 \neq j_2 \leq p} \sum_{i \in \mathcal{P}(n,1)} \left\{ (x_{i, j_1} - \bar{x}_{j_1})^2 (x_{i, j_2} - \bar{x}_{j_2})^2 - x_{i, j_1}^2 x_{i, j_2}^2 \right\} \\ &= \frac{1}{n^2} \sum_{1 \leq j_1 \neq j_2 \leq p} \sum_{1 \leq i \leq n} \sum_{\substack{s_1 + r_1 = 1, \\ s_2 + r_2 = 1}} C_{s_1, r_1, s_2, r_2} \prod_{k=1}^2 \left\{ (-x_{i, j_k} \bar{x}_{j_k})^{s_k} (\bar{x}_{j_k}^2)^{r_k} \right\}, \end{aligned}$$

where  $C_{s_1, r_1, s_2, r_2}$  is some constant and we use

$$\begin{aligned} & (x_{i, j_1} - \bar{x}_{i, j_1})^2 (x_{i, j_2} - \bar{x}_{i, j_2})^2 - x_{i, j_1}^2 x_{i, j_2}^2 \\ &= (x_{i, j_1}^2 - 2x_{i, j_1} \bar{x}_{j_1} + \bar{x}_{j_1}^2)(x_{i, j_2}^2 - 2x_{i, j_2} \bar{x}_{j_2} + \bar{x}_{j_2}^2) - x_{i, j_1}^2 x_{i, j_2}^2 \\ &= \sum_{s_1+r_1=1, s_2+r_2=1} \left\{ (-2x_{i, j_1} \bar{x}_{j_1})^{s_1} (\bar{x}_{j_1}^2)^{r_1} \right\} \times \left\{ (-2x_{i, j_2} \bar{x}_{j_2})^{s_2} (\bar{x}_{j_2}^2)^{r_2} \right\}. \end{aligned}$$

Following this example, we similarly give the form of  $\mathbb{V}_{u,2}(a)$  for general  $a \geq 1$ . Given tuple  $\mathbf{i} \in \mathcal{P}(n, a)$ , for  $k = 1, 2$ , let  $\mathbf{i}_{(a-r_k)}^{(k)}$  represent a sub-tuple of  $\mathbf{i}$  with length  $a - r_k$ , and define  $\mathcal{S}(\mathbf{i}, a - r_k)$  to be the collection of sub-tuples of  $\mathbf{i}$  with length  $a - r_k$ . Then for  $a \geq 1$ , we write  $\mathbb{V}_{u,2}(a) = \sum_{1 \leq s_1+r_1 \leq a, 1 \leq s_2+r_2 \leq a} T_{s_1, r_1, s_2, r_2}$ , where

$$\begin{aligned} T_{s_1, r_1, s_2, r_2} &= \frac{a!}{(P^n)^2} \sum_{1 \leq j_1 \neq j_2 \leq p} \sum_{\substack{\mathbf{i} \in \mathcal{P}(n, a); \\ \mathbf{i}_{(a-r_k)}^{(k)} \in \mathcal{S}(\mathbf{i}, a-r_k): k=1,2}} C_{s_1, r_1, s_2, r_2} \\ &\quad \times \prod_{k=1}^2 \left\{ (-\bar{x}_{j_k})^{s_k+2r_k} \prod_{t_k=1}^{s_k} x_{i_{t_k}, j_k}^{(k)} \prod_{t_k=s_k+1}^{a-r_k} (x_{i_{t_k}, j_k}^{(k)})^2 \right\}. \end{aligned}$$

When  $a$  is finite, it suffices to prove  $E(T_{s_1, r_1, s_2, r_2}^2) = o(p^4 n^{-2a})$ . Note that

$$\begin{aligned} & E(T_{s_1, r_1, s_2, r_2}^2) \\ &= \frac{(a!)^2}{(P^n)^4} \sum_{\substack{1 \leq j_1 \neq j_2 \leq p \\ 1 \leq \tilde{j}_1 \neq \tilde{j}_2 \leq p}} \sum_{\substack{\mathbf{i}, \tilde{\mathbf{i}} \in \mathcal{P}(n, a); \\ \mathbf{i}_{(a-r_k)}^{(k)} \in \mathcal{S}(\mathbf{i}, a-r_k): k=1,2; \\ \tilde{\mathbf{i}}_{(a-r_k)}^{(k)} \in \mathcal{S}(\tilde{\mathbf{i}}, a-r_k): k=1,2}} C_{s_1, r_1, s_2, r_2}^2 \\ &\quad \times E \left\{ \prod_{k=1}^2 (\bar{x}_{j_k} \bar{x}_{\tilde{j}_k})^{s_k+2r_k} \prod_{t_k=1}^{s_k} (x_{i_{t_k}, j_k}^{(k)} x_{\tilde{i}_{t_k}, \tilde{j}_k}^{(k)}) \prod_{t_k=s_k+1}^{a-r_k} (x_{i_{t_k}, j_k}^{(k)} x_{\tilde{i}_{t_k}, \tilde{j}_k}^{(k)})^2 \right\}. \end{aligned}$$

Recall that  $\bar{x}_j = \sum_{i=1}^n x_{i,j}/n$ . We have

$$\begin{aligned} & E(T_{s_1, r_1, s_2, r_2}^2) \\ &= \frac{(a!)^2}{(P^n)^4 n^{\sum_{k=1}^2 (2s_k+4r_k)}} \sum_{\substack{1 \leq j_1 \neq j_2 \leq p \\ 1 \leq \tilde{j}_1 \neq \tilde{j}_2 \leq p}} \sum_{\substack{\mathbf{i}, \tilde{\mathbf{i}} \in \mathcal{P}(n, a); \\ \mathbf{i}_{(a-r_k)}^{(k)} \in \mathcal{S}(\mathbf{i}, a-r_k): k=1,2; \\ \tilde{\mathbf{i}}_{(a-r_k)}^{(k)} \in \mathcal{S}(\tilde{\mathbf{i}}, a-r_k): k=1,2}} C_{s_1, r_1, s_2, r_2}^2 \\ &\quad \times \sum_{\mathbf{m}^{(k)}, \tilde{\mathbf{m}}^{(k)} \in \mathcal{C}(n, s_k+2r_k); k=1,2} T \{ \mathbf{i}_{(a-r_k)}^{(k)}, \tilde{\mathbf{i}}_{(a-r_k)}^{(k)}, \mathbf{m}^{(k)}, \tilde{\mathbf{m}}^{(k)}; k=1,2 \}, \end{aligned}$$

where  $\mathcal{C}(n, s_k + 2r_k)$  follows the notation at the beginning of Section B and

$$\begin{aligned} & T\{\mathbf{i}_{(a-r_k)}^{(k)}, \tilde{\mathbf{i}}_{(a-r_k)}^{(k)}, \mathbf{m}^{(k)}, \tilde{\mathbf{m}}^{(k)}; k = 1, 2\} \\ &= \mathbb{E}\left\{ \prod_{k=1}^2 \prod_{\tilde{l}_k=1}^{s_k+2r_k} (x_{m_{\tilde{l}_k, j_k}} x_{\tilde{m}_{\tilde{l}_k, \tilde{j}_k}}) \prod_{t_k=1}^{s_k} (x_{i_{t_k, j_k}^{(k)}} x_{\tilde{i}_{t_k, \tilde{j}_k}^{(k)}}) \prod_{t_k=s_k+1}^{a-r_k} (x_{i_{t_k, j_k}^{(k)}} x_{\tilde{i}_{t_k, \tilde{j}_k}^{(k)}}) \right\}. \end{aligned}$$

Since  $\mathbb{E}(x_{i,j}) = 0$ ,  $T\{\mathbf{i}_{(a-r_k)}^{(k)}, \tilde{\mathbf{i}}_{(a-r_k)}^{(k)}, \mathbf{m}^{(k)}, \tilde{\mathbf{m}}^{(k)}; k = 1, 2\} \neq 0$  only when

$$\begin{aligned} & \left| \bigcup_{k=1}^2 \{\mathbf{m}^{(k)}\} \cup \{\tilde{\mathbf{m}}^{(k)}\} \cup \{\mathbf{i}_{(a-r_k)}^{(k)}\} \cup \{\tilde{\mathbf{i}}_{(a-r_k)}^{(k)}\} \right| - \left| \bigcup_{k=1}^2 \{\mathbf{i}_{(a-r_k)}^{(k)}\} \cup \{\tilde{\mathbf{i}}_{(a-r_k)}^{(k)}\} \right| \\ & \leq \sum_{k=1}^2 (s_k + 2r_k). \end{aligned}$$

Since  $\mathbf{i}_{(a-r_k)}^{(k)}$  and  $\tilde{\mathbf{i}}_{(a-r_k)}^{(k)}$  are sub-tuples of  $\mathbf{i}$  and  $\tilde{\mathbf{i}} \in \mathcal{P}(n, a)$ ,  $|\bigcup_{k=1}^2 \{\mathbf{i}_{(a-r_k)}^{(k)}\} \cup \{\tilde{\mathbf{i}}_{(a-r_k)}^{(k)}\}| \leq |\{\mathbf{i}\} \cup \{\tilde{\mathbf{i}}\}| \leq 2a$ . Therefore,

$$(B.3.2) \quad \left| \bigcup_{k=1}^2 \{\mathbf{m}^{(k)}\} \cup \{\tilde{\mathbf{m}}^{(k)}\} \cup \{\mathbf{i}_{(a-r_k)}^{(k)}\} \cup \{\tilde{\mathbf{i}}_{(a-r_k)}^{(k)}\} \right| \leq 2a + \sum_{k=1}^2 (s_k + 2r_k).$$

By (B.3.2) and the boundedness of moments in Condition 2.4, we have

$$\begin{aligned} \mathbb{E}(T_{s_1, r_1, s_2, r_2}^2) &= O\left(p^4 n^{-4a - \sum_{k=1}^2 (2s_k + 4r_k) + 2a + \sum_{k=1}^2 (s_k + 2r_k)}\right) \\ &= O\left(p^4 n^{-2a - \sum_{k=1}^2 (s_k + 2r_k)}\right) = o(p^4 n^{-2a}), \end{aligned}$$

where we use  $\sum_{k=1}^2 (s_k + 2r_k) \geq 1$ .

#### B.4. Lemmas for the proof of Theorem 2.5.

B.4.1. *Proof of Lemma A.5.1 (on Page 9, Section A.5).* To show  $\text{var}\{\mathcal{U}(a)\} \simeq \text{var}(T_{U,a,1,1})$ , it suffices to prove  $\text{var}(T_{U,a,1,1}) = \Theta(p^2 n^{-a})$ ,  $\text{var}(T_{U,a,1,2}) = o(p^2 n^{-a})$  and  $\text{var}(T_{U,a,2}) = o(p^2 n^{-a})$ . The following three sections B.4.1.1–B.4.1.3 prove the three results respectively.

B.4.1.1.  $\text{var}(T_{U,a,1,1}) = \Theta(p^2 n^{-a})$ . As  $\mathbb{E}(T_{U,a,1,1}) = 0$ ,  $\text{var}(T_{U,a,1,1}) = \mathbb{E}(T_{U,a,1,1}^2)$ , and we have

$$\text{var}(T_{U,a,1,1}) = \sum_{(j_1, j_2), (j_3, j_4) \in J_A^c} (P_a^n)^{-2} \sum_{\mathbf{i}, \tilde{\mathbf{i}} \in \mathcal{P}(n, a)} \mathbb{E}\left(\prod_{k=1}^a x_{i_k, j_1} x_{i_k, j_2} x_{\tilde{i}_k, j_3} x_{\tilde{i}_k, j_4}\right).$$

Similarly to Section B.1.1,  $E(\prod_{k=1}^a x_{i_k, j_1} x_{i_k, j_2} x_{i_k, j_3} x_{i_k, j_4}) \neq 0$  only when  $\{\mathbf{i}\} = \{\tilde{\mathbf{i}}\}$ . Therefore,

$$\text{var}(T_{U,a,1,1}) = \sum_{(j_1, j_2), (j_3, j_4) \in J_A^c} (P_a^n)^{-1} a! \times \left\{ E\left( \prod_{t=1}^4 x_{1, j_t} \right) \right\}^a.$$

By Condition A.1, as  $(j_1, j_2), (j_3, j_4) \in J_A^c$ ,

$$(B.4.1) \quad E(x_{1, j_1} x_{1, j_2} x_{1, j_3} x_{1, j_4}) = \kappa_1 (\sigma_{j_1, j_3} \sigma_{j_2, j_4} + \sigma_{j_1, j_4} \sigma_{j_2, j_3}).$$

We next evaluate (B.4.1) by discussing three cases on  $(j_1, j_2, j_3, j_4)$ . First, if  $|\{j_1, j_2\} \cap \{j_3, j_4\}| = 2$ , (B.4.1) =  $\kappa_1 \sigma_{j_1, j_1} \sigma_{j_2, j_2} = \Theta(1)$  by Condition 2.1.

$$\sum_{\substack{(j_1, j_2), \\ (j_3, j_4) \in J_A^c}} \left\{ E\left( \prod_{t=1}^4 x_{1, j_t} \right) \right\}^a \times \mathbf{1}_{\{|\{j_1, j_2\} \cap \{j_3, j_4\}|=2\}} = 2 \sum_{(j_1, j_2) \in J_A^c} (\kappa_1 \sigma_{j_1, j_1} \sigma_{j_2, j_2})^a.$$

Second, if  $|\{j_1, j_2\} \cap \{j_3, j_4\}| = 1$ , we assume without loss of generality  $j_1 = j_3$  and  $j_2 \neq j_4$ , (B.4.1) =  $\kappa_1 \sigma_{j_1, j_1} \sigma_{j_2, j_4}$ , which is nonzero only when  $(j_2, j_4) \in J_A$ , and then (B.4.1) =  $O(\rho^a)$ . By the symmetricity of the indexes,

$$\begin{aligned} & \sum_{(j_1, j_2), (j_3, j_4) \in J_A^c} \left\{ E\left( \prod_{t=1}^4 x_{1, j_t} \right) \right\}^a \times \mathbf{1}_{\{|\{j_1, j_2\} \cap \{j_3, j_4\}|=1\}} \\ & \leq C \sum_{1 \leq j \leq p; (j_2, j_4) \in J_A} \rho^a = O(1)p|J_A|\rho^a. \end{aligned}$$

Third, if  $|\{j_1, j_2\} \cap \{j_3, j_4\}| = 0$ , we know  $j_1 \neq j_2 \neq j_3 \neq j_4$ , and (B.4.1)  $\neq 0$  only if  $(j_1, j_3), (j_2, j_4) \in J_A$  or  $(j_1, j_4), (j_2, j_3) \in J_A$ . Then (B.4.1) =  $O(\rho^{2a})$ . By the symmetricity of the indexes,

$$\begin{aligned} & \sum_{(j_1, j_2), (j_3, j_4) \in J_A^c} \left\{ E\left( \prod_{t=1}^4 x_{1, j_t} \right) \right\}^a \times \mathbf{1}_{\{|\{j_1, j_2\} \cap \{j_3, j_4\}|=0\}} \\ & \leq C \sum_{(j_1, j_3), (j_2, j_4) \in J_A} \rho^{2a} = O(1)|J_A|^2 \rho^{2a}. \end{aligned}$$

In summary, we know

$$\begin{aligned} \text{var}(T_{U,a,1,1}) &= 2a! \kappa_1^a (P_a^n)^{-1} \sum_{(j_1, j_2) \in J_A^c} \sigma_{j_1, j_1}^a \sigma_{j_2, j_2}^a \\ &\quad + O(1)p|J_A|\rho^a n^{-a} + O(1)|J_A|^2 \rho^{2a} n^{-a}. \end{aligned}$$

Since we assume  $|J_A|\rho^a = O(pn^{-a/2})$ ,  $|J_A| = o(p^2)$  and  $|J_A^c| = \Theta(p^2)$ ,

$$\text{var}(T_{U,a,1,1}) \simeq 2a!\kappa_1^a(P_a^n)^{-1} \sum_{1 \leq j_1 \neq j_2 \leq p} (\sigma_{j_1, j_1} \sigma_{j_2, j_2})^a,$$

which is of order  $\Theta(p^2 n^{-a})$ .

*B.4.1.2.*  $\text{var}(T_{U,a,1,2}) = o(p^2 n^{-a})$ . In this section, we prove  $\text{var}(T_{U,a,1,2}) = o(p^2 n^{-a})$ . As  $T_{U,a,1,2} = \sum_{(j_1, j_2) \in J_A^c} \sum_{c=1}^a K(c, j_1, j_2)$ , by the Cauchy-Schwarz inequality,

$$\text{var}(T_{U,a,1,2}) \leq C \times \sum_{c=1}^a \text{var} \left\{ \sum_{(j_1, j_2) \in J_A^c} K(c, j_1, j_2) \right\},$$

where  $C$  is some constant. As  $a$  is finite, to prove  $\text{var}(T_{U,a,1,2}) = o(p^2 n^{-a})$ , it suffices to prove  $\text{var} \left\{ \sum_{(j_1, j_2) \in J_A^c} K(c, j_1, j_2) \right\} = o(p^2 n^{-a})$ , for each  $1 \leq c \leq a$ . Note that  $\mathbb{E}\{K(c, j_1, j_2)\} = 0$  and then

$$\begin{aligned} \text{var} \left\{ \sum_{(j_1, j_2) \in J_A^c} K(c, j_1, j_2) \right\} &= \mathbb{E} \left[ \left\{ \sum_{(j_1, j_2) \in J_A^c} K(c, j_1, j_2) \right\}^2 \right] \\ &= F^2(a, c) \sum_{\substack{\mathbf{i}, \tilde{\mathbf{i}} \in \mathcal{P}(n, a+c); \\ (j_1, j_2), (j_3, j_4) \in J_A^c}} Q_c(\mathbf{i}, j_1, j_2, \tilde{\mathbf{i}}, j_3, j_4), \end{aligned}$$

where we define

$$\begin{aligned} Q_c(\mathbf{i}, j_1, j_2, \tilde{\mathbf{i}}, j_3, j_4) &= \mathbb{E} \left[ \prod_{t=1}^{a-c} x_{i_t, j_1} x_{i_t, j_2} \prod_{t=a-c+1}^a x_{i_t, j_1} \prod_{t=a+1}^{a+c} x_{i_t, j_2} \right. \\ &\quad \left. \times \prod_{\tilde{i}=1}^{a-c} x_{\tilde{i}_{\tilde{i}}, j_3} x_{\tilde{i}_{\tilde{i}}, j_4} \prod_{\tilde{t}=a-c+1}^a x_{\tilde{i}_{\tilde{t}}, j_3} \prod_{\tilde{t}=a+1}^{a+c_2} x_{\tilde{i}_{\tilde{t}}, j_4} \right]. \end{aligned}$$

As  $F^2(a, c) = O(n^{-2(a+c)})$ , to finish the proof, it remains to prove

$$(B.4.2) \quad \sum_{\substack{\mathbf{i}, \tilde{\mathbf{i}} \in \mathcal{P}(n, a+c); \\ (j_1, j_2), (j_3, j_4) \in J_A^c}} Q_c(\mathbf{i}, j_1, j_2, \tilde{\mathbf{i}}, j_3, j_4) = o(n^{2(a+c)-a} p^2).$$

We note that  $\mathbb{E}(x_{1,j}) = 0$  and  $\mathbb{E}(x_{1,j_1} x_{1,j_2}) = \mathbb{E}(x_{1,j_3} x_{1,j_4}) = 0$  for  $(j_1, j_2), (j_3, j_4) \in J_A^c$ . Similarly to Section B.4.1.1,  $Q_c(\mathbf{i}, j_1, j_2, \tilde{\mathbf{i}}, j_3, j_4) = 0$  if  $\{\mathbf{i}\} \neq \{\tilde{\mathbf{i}}\}$ , and

$$(B.4.3) \quad \sum_{\mathbf{i}, \tilde{\mathbf{i}} \in \mathcal{P}(n, a+c)} \mathbf{1}_{\{Q_c(\mathbf{i}, j_1, j_2, \tilde{\mathbf{i}}, j_3, j_4) \neq 0\}} = \sum_{\mathbf{i}, \tilde{\mathbf{i}} \in \mathcal{P}(n, a+c)} \mathbf{1}_{\{\{\mathbf{i}\} = \{\tilde{\mathbf{i}}\}\}} = O(n^{a+c}).$$

To prove (B.4.2), it remains to prove for given  $\mathbf{i}, \tilde{\mathbf{i}} \in \mathcal{P}(n, a + c)$ ,

$$(B.4.4) \quad \left| \sum_{(j_1, j_2), (j_3, j_4) \in J_A^c} Q_c(\mathbf{i}, j_1, j_2, \tilde{\mathbf{i}}, j_3, j_4) \right| = O(p^2).$$

We next prove (B.4.4) by discussing the value of  $Q_c(\mathbf{i}, j_1, j_2, \tilde{\mathbf{i}}, j_3, j_4)$ . To facilitate the discussion, for given  $\mathbf{i}, \tilde{\mathbf{i}} \in \mathcal{P}(n, a + c)$ , we decompose the sets  $\{\mathbf{i}\}$  and  $\{\tilde{\mathbf{i}}\}$  into three disjoint sets respectively, defined as

$$\begin{aligned} \{\mathbf{i}\}_{(1)} &= \{i_1, \dots, i_{a-c}\}, \quad \{\mathbf{i}\}_{(2)} = \{i_{a-c+1}, \dots, i_a\}, \quad \{\mathbf{i}\}_{(3)} = \{i_{a+1}, \dots, i_{a+c}\}, \\ \{\tilde{\mathbf{i}}\}_{(1)} &= \{\tilde{i}_1, \dots, \tilde{i}_{a-c}\}, \quad \{\tilde{\mathbf{i}}\}_{(2)} = \{\tilde{i}_{a-c+1}, \dots, \tilde{i}_a\}, \quad \{\tilde{\mathbf{i}}\}_{(3)} = \{\tilde{i}_{a+1}, \dots, \tilde{i}_{a+c}\}, \end{aligned}$$

which satisfy that  $\{\mathbf{i}\} = \cup_{l=1}^3 \{\mathbf{i}\}_{(l)}$  and  $\{\tilde{\mathbf{i}}\} = \cup_{l=1}^3 \{\tilde{\mathbf{i}}\}_{(l)}$ .

When  $c \leq a - 1$ ,  $\{\mathbf{i}\}_{(1)} \neq \emptyset$ . We consider an index  $i \in \{\mathbf{i}\}_{(1)}$ , and discuss four different cases. First, if  $i \notin \{\tilde{\mathbf{i}}\}$ ,

$$Q_c(\mathbf{i}, j_1, j_2, \tilde{\mathbf{i}}, j_3, j_4) = E(x_{i, j_1} x_{i, j_2}) E(\text{other terms}) = 0,$$

where the last equation follows from  $E(x_{i, j_1} x_{i, j_2}) = 0$  when  $(j_1, j_2) \in J_A$ . Second, if  $i \in \{\tilde{\mathbf{i}}\}_{(2)}$ ,

$$Q_c(\mathbf{i}, j_1, j_2, \tilde{\mathbf{i}}, j_3, j_4) = E(x_{i, j_1} x_{i, j_2} x_{i, j_3}) E(\text{other terms}) = 0$$

where the last equation is obtained by Condition A.1. Third, if  $i \in \{\tilde{\mathbf{i}}\}_{(3)}$ , similarly by Condition A.1, we also know

$$(B.4.5) \quad Q_c(\mathbf{i}, j_1, j_2, \tilde{\mathbf{i}}, j_3, j_4) = E(x_{i, j_1} x_{i, j_2} x_{i, j_4}) E(\text{other terms}) = 0.$$

Fourth, if  $i \in \{\tilde{\mathbf{i}}\}_{(1)}$ ,

$$(B.4.6) \quad Q_c(\mathbf{i}, j_1, j_2, \tilde{\mathbf{i}}, j_3, j_4) = E(x_{i, j_1} x_{i, j_2} x_{i, j_3} x_{i, j_4}) E(\text{other terms}).$$

Under Condition A.1, as  $E(x_{i, j_1} x_{i, j_2}) = E(x_{i, j_3} x_{i, j_4}) = 0$  when  $(j_1, j_2)$  and  $(j_3, j_4) \in J_A^c$ ,

$$E\left(\prod_{t=1}^4 x_{i, j_t}\right) = \kappa_1 \left\{ E(x_{i, j_1} x_{i, j_3}) E(x_{i, j_2} x_{i, j_4}) + E(x_{i, j_1} x_{i, j_4}) E(x_{i, j_2} x_{i, j_3}) \right\}.$$

In addition, when  $c = a$ ,  $\{\mathbf{i}\}_{(1)} = \emptyset$  but  $\{\mathbf{i}\}_{(2)}$  and  $\{\mathbf{i}\}_{(3)} \neq \emptyset$ . We next consider an index  $i \in \{\mathbf{i}\}_{(2)}$  without loss of generality. Following similar analysis, we know  $Q_c(\mathbf{i}, j_1, j_2, \tilde{\mathbf{i}}, j_3, j_4) = 0$  when  $i \notin \{\tilde{\mathbf{i}}\}$ .



By symmetrically analyzing the indexes in  $\mathbf{i}$  and  $\tilde{\mathbf{i}}$  similarly as above, we know that  $Q_c(\mathbf{i}, j_1, j_2, \tilde{\mathbf{i}}, j_3, j_4) \neq 0$  only when  $\{\mathbf{i}\}_{(1)} = \{\tilde{\mathbf{i}}\}_{(1)}$  and  $\{\mathbf{i}\}_{(2)} \cup \{\tilde{\mathbf{i}}\}_{(3)} = \{\tilde{\mathbf{i}}\}_{(2)} \cup \{\mathbf{i}\}_{(3)}$ . When  $Q_c(\mathbf{i}, j_1, j_2, \tilde{\mathbf{i}}, j_3, j_4) \neq 0$ , suppose  $r = |\{\mathbf{i}\}_{(2)} \cap \{\tilde{\mathbf{i}}\}_{(2)}|$  then  $|\{\mathbf{i}\}_{(2)} \cap \{\tilde{\mathbf{i}}\}_{(3)}| = c-r$ ,  $|\{\mathbf{i}\}_{(3)} \cap \{\tilde{\mathbf{i}}\}_{(2)}| = c-r$ , and  $|\{\mathbf{i}\}_{(3)} \cap \{\tilde{\mathbf{i}}\}_{(3)}| = r$ . It follows that

$$\begin{aligned}
\text{(B.4.7)} \quad & Q_c(\mathbf{i}, j_1, j_2, \tilde{\mathbf{i}}, j_3, j_4) \\
&= \left\{ \mathbf{E} \left( \prod_{t=1}^4 x_{1,j_t} \right) \right\}^{a-c} \{ \mathbf{E}(x_{1,j_1} x_{1,j_3}) \mathbf{E}(x_{1,j_2} x_{1,j_4}) \}^r \\
&\quad \times \{ \mathbf{E}(x_{1,j_1} x_{1,j_4}) \mathbf{E}(x_{1,j_2} x_{1,j_3}) \}^{c-r} \\
&= \left\{ \mathbf{E} \left( \prod_{t=1}^4 x_{1,j_t} \right) \right\}^{a-c} (\sigma_{j_1, j_3} \sigma_{j_2, j_4})^r (\sigma_{j_1, j_4} \sigma_{j_2, j_3})^{c-r}.
\end{aligned}$$

To prove (B.4.4), we next examine the value of (B.4.7) with respect to three different cases of  $(j_1, j_2, j_3, j_4)$ .

**Case (1)** If  $|\{j_1, j_2\} \cap \{j_3, j_4\}| = 2$ , it means that  $\{j_1, j_2\} = \{j_3, j_4\}$ . Assume, without loss of generality, that  $j_1 = j_3$  and  $j_2 = j_4$ . Then (B.4.7) =  $O(1)(\sigma_{j_1, j_1} \sigma_{j_2, j_2})^{a-c+r} (\sigma_{j_1, j_2}^2)^{c-r}$ , which is nonzero only when  $r = c$  as  $\sigma_{j_1, j_2} = 0$ . By the symmetricity of  $j$  indexes and the boundedness of moments in Condition 2.1,

$$\left| \sum_{(j_1, j_2), (j_3, j_4) \in J_A^c} Q_c(\mathbf{i}, j_1, j_2, \tilde{\mathbf{i}}, j_3, j_4) \times \mathbf{1}_{\{|\{j_1, j_2\} \cap \{j_3, j_4\}|=2\}} \right| \leq Cp^2.$$

**Case (2)** If  $|\{j_1, j_2\} \cap \{j_3, j_4\}| = 1$ , we assume without loss of generality that  $j_1 = j_3$  but  $j_2 \neq j_4$ . Then (B.4.7) =  $O(1)(\sigma_{j_1, j_1} \sigma_{j_2, j_4})^{a-c+r} (\sigma_{j_1, j_4} \sigma_{j_1, j_2})^{c-r}$ , which is also nonzero only when  $r = c$ . By the symmetricity of  $j$  indexes and Condition 2.1, we have

$$\begin{aligned}
& \left| \sum_{(j_1, j_2), (j_3, j_4) \in J_A^c} Q_c(\mathbf{i}, j_1, j_2, \tilde{\mathbf{i}}, j_3, j_4) \times \mathbf{1}_{\{|\{j_1, j_2\} \cap \{j_3, j_4\}|=1\}} \right| \\
& \leq C \left| \sum_{(j_1, j_2), (j_3, j_4) \in J_A^c} (\sigma_{j_1, j_1} \sigma_{j_2, j_4})^a \right| \leq \sum_{1 \leq j \leq p, (j_2, j_4) \in J_A} O(\rho^a) = O(p|J_A|\rho^a),
\end{aligned}$$

where we use Condition 2.5 that  $\sigma_{j_2, j_4} = \rho$  when  $(j_2, j_4) \in J_A$  and  $\sigma_{j_2, j_4} = 0$  when  $(j_2, j_4) \notin J_A$ .

**Case (3)** If  $|\{j_1, j_2\} \cap \{j_3, j_4\}| = 0$ , it means that  $j_1 \neq j_2 \neq j_3 \neq j_4$ . Then

$$(B.4.7) = O(1)(\sigma_{j_1, j_3} \sigma_{j_2, j_4} + \sigma_{j_1, j_4} \sigma_{j_2, j_3})^{a-c} (\sigma_{j_1, j_3} \sigma_{j_2, j_4})^r (\sigma_{j_1, j_4} \sigma_{j_2, j_3})^{c-r},$$

which nonzero only when  $(j_1, j_3), (j_2, j_4) \in J_A^c$  or  $(j_1, j_4), (j_2, j_3) \in J_A^c$ . By the symmetricity of  $j$  indexes, Condition 2.1 and Condition 2.5,

$$\begin{aligned} & \left| \sum_{(j_1, j_2), (j_3, j_4) \in J_A^c} Q_c(\mathbf{i}, j_1, j_2, \tilde{\mathbf{i}}, j_3, j_4) \times \mathbf{1}_{\{|\{j_1, j_2\} \cap \{j_3, j_4\}|=0\}} \right| \\ & \leq C \sum_{(j_1, j_3), (j_2, j_4) \in J_A^c} \rho^{2a} = O(|J_A|^2 \rho^{2a}). \end{aligned}$$

In summary,

$$\left| \sum_{(j_1, j_2), (j_3, j_4) \in J_A^c} Q_c(\mathbf{i}, j_1, j_2, \tilde{\mathbf{i}}, j_3, j_4) \right| = O(p^2 + p|J_A|\rho^a + |J_A|^2 \rho^{2a}) = o(p^2),$$

as we assume  $|J_A|\rho^a = O(pn^{-a/2})$ .

*B.4.1.3.*  $\text{var}(T_{U,a,2}) = o(p^2 n^{-a})$ . Similarly to Section B.4.1.2, by the Cauchy-Schwarz inequality,

$$(B.4.8) \quad \text{var}(T_{U,a,2}) \leq C \sum_{c=0}^a \text{var}(T_{U,a,2,c}),$$

where  $T_{U,a,2,c} = \sum_{(j_1, j_2) \in J_A} K(c, j_1, j_2)$ . To prove  $\text{var}(T_{U,a,2}) = o(p^2 n^{-a})$ , it suffices to prove  $\text{var}(T_{U,a,2,c}) = o(p^2 n^{-a})$  for  $0 \leq c \leq a$ . Following the notation in Section B.4.1.2, we have

$$\mathbb{E}(T_{U,a,2,c}^2) = F^2(a, c) \sum_{\substack{\mathbf{i}, \tilde{\mathbf{i}} \in \mathcal{P}(n, a+c); \\ (j_1, j_2), (j_3, j_4) \in J_A}} Q_c(\mathbf{i}, j_1, j_2, \tilde{\mathbf{i}}, j_3, j_4).$$

When  $1 \leq c \leq a$ ,  $\mathbb{E}(T_{U,a,2,c}) = 0$ ; when  $c = 0$ ,  $\mathbb{E}(T_{U,a,2,0}) = \sum_{(j_1, j_2) \in J_A} \sigma_{j_1, j_2}^a$ . Then

$$(B.4.9) \quad \text{var}(T_{U,a,2,c}) = F^2(a, c) \sum_{\substack{\mathbf{i}, \tilde{\mathbf{i}} \in \mathcal{P}(n, a+c); \\ (j_1, j_2), (j_3, j_4) \in J_A}} \tilde{Q}_c(\mathbf{i}, j_1, j_2, \tilde{\mathbf{i}}, j_3, j_4),$$

where we define  $\tilde{Q}_c(\mathbf{i}, j_1, j_2, \tilde{\mathbf{i}}, j_3, j_4) = Q_c(\mathbf{i}, j_1, j_2, \tilde{\mathbf{i}}, j_3, j_4)$  when  $1 \leq c \leq a$ ; and  $\tilde{Q}_c(\mathbf{i}, j_1, j_2, \tilde{\mathbf{i}}, j_3, j_4) = Q_c(\mathbf{i}, j_1, j_2, \tilde{\mathbf{i}}, j_3, j_4) - (\sigma_{j_1, j_2} \sigma_{j_3, j_4})^a$  when  $c = 0$ .

To prove  $\text{var}(T_{U,a,2,c}) = o(p^2 n^{-a})$  for  $1 \leq c \leq a$ , we next examine the value of  $Q_c(\mathbf{i}, j_1, j_2, \tilde{\mathbf{i}}, j_3, j_4)$ . For given  $\mathbf{i}, \tilde{\mathbf{i}} \in \mathcal{P}(n, a+c)$ , we define  $\{\mathbf{i}\}_{(l)}$  and  $\{\tilde{\mathbf{i}}\}_{(l)}$  for  $l = 1, 2, 3$  same as in Section B.4.1.2. Consider an index  $i \in \{\mathbf{i}\}_{(2)}$ . If  $i \notin \{\tilde{\mathbf{i}}\}$ ,

$$Q_c(\mathbf{i}, j_1, j_2, \tilde{\mathbf{i}}, j_3, j_4) = E(x_{i,j_1})E(\text{other terms}) = 0.$$

If  $i \in \{\tilde{\mathbf{i}}\}_{(1)}$ , by Condition A.1,

$$Q_c(\mathbf{i}, j_1, j_2, \tilde{\mathbf{i}}, j_3, j_4) = E(x_{i,j_1} x_{i,j_3} x_{i,j_4})E(\text{other terms}) = 0.$$

Similarly, for an index  $i \in \{\mathbf{i}\}_{(3)}$ , we have  $Q_c(\mathbf{i}, j_1, j_2, \tilde{\mathbf{i}}, j_3, j_4) = 0$  if  $i \notin \{\tilde{\mathbf{i}}\}$  or  $i \in \{\tilde{\mathbf{i}}\}_{(1)}$ . Analyzing the indexes in  $\{\tilde{\mathbf{i}}\}$  symmetrically, we know that  $Q_c(\mathbf{i}, j_1, j_2, \tilde{\mathbf{i}}, j_3, j_4) \neq 0$  only when  $\{\mathbf{i}\}_{(2)} \cup \{\mathbf{i}\}_{(3)} = \{\tilde{\mathbf{i}}\}_{(2)} \cup \{\tilde{\mathbf{i}}\}_{(3)}$ . Suppose  $|\{\mathbf{i}\}_{(2)} \cap \{\tilde{\mathbf{i}}\}_{(2)}| = r$ , then  $|\{\mathbf{i}\}_{(2)} \cap \{\tilde{\mathbf{i}}\}_{(3)}| = c - r$ ,  $|\{\mathbf{i}\}_{(3)} \cap \{\tilde{\mathbf{i}}\}_{(2)}| = c - r$ , and  $|\{\mathbf{i}\}_{(3)} \cap \{\tilde{\mathbf{i}}\}_{(3)}| = r$ . Moreover, we let  $|\{\mathbf{i}\}_{(1)} \cap \{\tilde{\mathbf{i}}\}_{(1)}| = t_c$  then  $0 \leq t_c \leq a - c$ . It follows that

$$\begin{aligned} \text{(B.4.10)} \quad & Q_c(\mathbf{i}, j_1, j_2, \tilde{\mathbf{i}}, j_3, j_4) \\ &= \left\{ E\left( \prod_{t=1}^4 x_{i,j_t} \right) \right\}^{t_c} \left\{ E(x_{i,j_1} x_{i,j_2}) E(x_{i,j_3} x_{i,j_4}) \right\}^{a-c-t_c} \\ & \quad \times \left\{ E(x_{i,j_1} x_{i,j_3}) E(x_{i,j_2} x_{i,j_4}) \right\}^r \left\{ E(x_{i,j_1} x_{i,j_4}) E(x_{i,j_2} x_{i,j_3}) \right\}^{c-r}. \end{aligned}$$

To examine (B.4.2), we next analyze (B.4.10) with respect to different  $c$  and  $t_c$  values, where  $0 \leq c \leq a$ ,  $0 \leq r \leq c$ , and  $0 \leq t_c \leq a - c$ .

When  $c = 0$  and  $t_c = t_0 = 0$ , it means that  $\{\mathbf{i}\} = \{\mathbf{i}\}_{(1)}$ ,  $\{\tilde{\mathbf{i}}\} = \{\tilde{\mathbf{i}}\}_{(1)}$ ,  $\{\mathbf{i}\} \cap \{\tilde{\mathbf{i}}\} = \emptyset$ , and  $Q_0(\mathbf{i}, j_1, j_2, \tilde{\mathbf{i}}, j_3, j_4) = (\sigma_{j_1, j_2} \sigma_{j_3, j_4})^a$ . Then

$$\begin{aligned} \text{(B.4.11)} \quad & \sum_{\substack{\mathbf{i}, \tilde{\mathbf{i}} \in \mathcal{P}(n, a); \\ (j_1, j_2), (j_3, j_4) \in J_A}} \tilde{Q}_0(\mathbf{i}, j_1, j_2, \tilde{\mathbf{i}}, j_3, j_4) \times \mathbf{1}_{\{t_0=0\}} \\ &= \sum_{\substack{\mathbf{i}, \tilde{\mathbf{i}} \in \mathcal{P}(n, a); \\ (j_1, j_2), (j_3, j_4) \in J_A}} \left\{ Q_0(\mathbf{i}, j_1, j_2, \tilde{\mathbf{i}}, j_3, j_4) - (\sigma_{j_1, j_2} \sigma_{j_3, j_4})^a \right\} \mathbf{1}_{\{t_0=0\}} = 0. \end{aligned}$$

In the following, it remains to consider the cases when  $c \geq 1$  or  $t_c \geq 1$  in (B.4.10), which are examined by discussing three cases  $(j_1, j_2, j_3, j_4)$  below.

**Case (1)** If  $|\{j_1, j_2\} \cap \{j_3, j_4\}| = 2$ , we assume without loss of generality that  $j_1 = j_3$  and  $j_2 = j_4$ . Then by Condition A.1,  $E(x_{1,j_1} x_{1,j_2} x_{1,j_3} x_{1,j_4}) =$

$\kappa_1(2\sigma_{j_1, j_2}^2 + \sigma_{j_1, j_1} \sigma_{j_2, j_2})$ , and

$$(B.4.10) = \{\kappa_1(2\sigma_{j_1, j_2}^2 + \sigma_{j_1, j_1} \sigma_{j_2, j_2})\}^{t_c} \sigma_{j_1, j_2}^{2(a-c-t_c)} (\sigma_{j_1, j_1} \sigma_{j_2, j_2})^r (\sigma_{j_1, j_2})^{2(c-r)}.$$

**Case (1.1)** For  $c = 0$  and  $1 \leq t_c = t_0 \leq a$ , we have  $|\{\mathbf{i}\} \cup \{\tilde{\mathbf{i}}\}| \leq 2a - t_0$ , and

$$(B.4.12) \left| \sum_{\substack{\mathbf{i}, \tilde{\mathbf{i}} \in \mathcal{P}(n, a); \\ (j_1, j_2), (j_3, j_4) \in J_A}} \tilde{Q}_0(\mathbf{i}, j_1, j_2, \tilde{\mathbf{i}}, j_3, j_4) \mathbf{1}_{\{c=0, 1 \leq t_0 \leq a, |\{j_1, j_2\} \cap \{j_3, j_4\}|=2\}} \right| \\ \leq C \sum_{t_0=1}^a n^{2a-t_0} \sum_{(j_1, j_2) \in J_A} |\sigma_{j_1, j_2}|^{2(a-t_0)} |2\sigma_{j_1, j_2}^2 + \sigma_{j_1, j_1} \sigma_{j_2, j_2}|^{t_0} + |\sigma_{j_1, j_2}|^{2a} \\ = \sum_{t_0=1}^a O(1) n^{2a-t_0} |J_A| \times (\rho^{2a} + \rho^{2(a-t_0)}),$$

where we use Condition 2.5.

**Case (1.2)** For  $1 \leq c \leq a$  and  $0 \leq t_c \leq a - c$ , we have  $|\{\mathbf{i}\} \cup \{\tilde{\mathbf{i}}\}| \leq 2a - t_c$ , and for each  $c$  given,

$$(B.4.13) \left| \sum_{\substack{\mathbf{i}, \tilde{\mathbf{i}} \in \mathcal{P}(n, a); \\ (j_1, j_2), (j_3, j_4) \in J_A}} \tilde{Q}_c(\mathbf{i}, j_1, j_2, \tilde{\mathbf{i}}, j_3, j_4) \mathbf{1}_{\{1 \leq t_c \leq a-c, |\{j_1, j_2\} \cap \{j_3, j_4\}|=2\}} \right| \\ \leq C \sum_{\substack{0 \leq r \leq c; \\ 0 \leq t_c \leq a-c}} n^{2a-t_c} \sum_{(j_1, j_2) \in J_A} |\sigma_{j_1, j_2}|^{2(a-c-t_c)} \\ \times |2\sigma_{j_1, j_2}^2 + \sigma_{j_1, j_1} \sigma_{j_2, j_2}|^{t_c} |\sigma_{j_1, j_1} \sigma_{j_2, j_2}|^r |\sigma_{j_1, j_2}|^{2(c-r)} \\ = \sum_{\substack{0 \leq r \leq c; \\ 0 \leq t_c \leq a-c}} O(1) n^{2a-t_c} |J_A| \{\rho^{2(a-r)} + \rho^{2(a-t_c-r)}\}.$$

**Case (2)** If  $|\{j_1, j_2\} \cap \{j_3, j_4\}| = 1$ , we assume without loss of generality that  $j_1 = j_3$  and  $j_2 \neq j_4$ . Then by Condition A.1,  $E(x_{1, j_1} x_{1, j_2} x_{1, j_3} x_{1, j_4}) = \kappa_1(2\sigma_{j_1, j_2} \sigma_{j_1, j_4} + \sigma_{j_1, j_1} \sigma_{j_2, j_4})$ . We then know

$$(B.4.10) = \{\kappa_1(2\sigma_{j_1, j_2} \sigma_{j_1, j_4} + \sigma_{j_1, j_1} \sigma_{j_2, j_4})\}^{t_c} (\sigma_{j_1, j_2} \sigma_{j_1, j_4})^{a-c-t_c} \\ \times (\sigma_{j_1, j_1} \sigma_{j_2, j_4})^r (\sigma_{j_1, j_4} \sigma_{j_1, j_2})^{c-r}.$$

**Case (2.1)** For  $c = 0$  and  $1 \leq t_c = t_0 \leq a$ , we have  $|\{\mathbf{i}\} \cup \{\tilde{\mathbf{i}}\}| \leq 2a - t_0$ , and (B.4.10)  $\neq 0$  at least when  $(j_1, j_2), (j_1, j_4) \in J_A$ . Then

$$\begin{aligned}
\text{(B.4.14)} & \left| \sum_{\substack{\mathbf{i}, \tilde{\mathbf{i}} \in \mathcal{P}(n, a); \\ (j_1, j_2), (j_3, j_4) \in J_A}} \tilde{Q}_0(\mathbf{i}, j_1, j_2, \tilde{\mathbf{i}}, j_3, j_4) \mathbf{1}_{\{c=0, 1 \leq t_0 \leq a, |\{j_1, j_2\} \cap \{j_3, j_4\}|=1\}} \right| \\
& \leq C \sum_{t_0=1}^a n^{2a-t_0} \sum_{(j_1, j_2), (j_1, j_4) \in J_A} \left( |\sigma_{j_1, j_2} \sigma_{j_1, j_4}|^a + |\sigma_{j_2, j_4}|^{t_0} |\sigma_{j_1, j_2} \sigma_{j_1, j_4}|^{a-t_0} \right) \\
& = \sum_{t_0=1}^a O(1) n^{2a-t_0} \max_{1 \leq j_1 \leq p} |J_{j_1}| \times |J_A| (\rho^{2a} + \rho^{2a-t_0}).
\end{aligned}$$

**Case (2.2)** For  $c \geq 1$  and  $0 \leq t_c \leq a - c$ , we have  $|\{\mathbf{i}\} \cup \{\tilde{\mathbf{i}}\}| \leq 2a - t_c$ . (B.4.10)  $\neq 0$  when  $(j_1, j_2), (j_1, j_4) \in J_A$  or  $(j_2, j_4) \in J_A$ . For given  $c$ , the range of (B.4.10) is between  $O(\rho^{2a-t_c-r})$  and  $O(\rho^{2a-r})$ .

$$\begin{aligned}
\text{(B.4.15)} & \left| \sum_{\substack{\mathbf{i}, \tilde{\mathbf{i}} \in \mathcal{P}(n, a); \\ (j_1, j_2), (j_3, j_4) \in J_A}} \tilde{Q}_c(\mathbf{i}, j_1, j_2, \tilde{\mathbf{i}}, j_3, j_4) \mathbf{1}_{\{0 \leq t_c \leq a-c, |\{j_1, j_2\} \cap \{j_3, j_4\}|=1\}} \right| \\
& = \sum_{\substack{0 \leq r \leq c; \\ 0 \leq t_c \leq a-c}} O(1) n^{2a-t_c} \max_{1 \leq j_1 \leq p} |J_{j_1}| \times |J_A| (\rho^{2a-t_c-r} + \rho^{2a-r}).
\end{aligned}$$

**Case (3)** If  $|\{j_1, j_2\} \cap \{j_3, j_4\}| = 0$ , we know  $j_1 \neq j_2 \neq j_3 \neq j_4$ . Then by Condition A.1 and 2.5,  $E(x_{1, j_1} x_{1, j_2} x_{1, j_3} x_{1, j_4}) = \kappa_1(\sigma_{j_1, j_2} \sigma_{j_3, j_4} + \sigma_{j_1, j_3} \sigma_{j_2, j_4} + \sigma_{j_1, j_4} \sigma_{j_2, j_3}) = O(\rho^2)$ . Therefore, (B.4.10)  $= O(\rho^{2a})$ .

**Case (3.1)** For  $c = 0$  and  $1 \leq t_c = t_0 \leq a$ , we have  $|\{\mathbf{i}\} \cup \{\tilde{\mathbf{i}}\}| \leq 2a - t_0$ .

$$\begin{aligned}
\text{(B.4.16)} & \left| \sum_{\substack{\mathbf{i}, \tilde{\mathbf{i}} \in \mathcal{P}(n, a); \\ (j_1, j_2), (j_3, j_4) \in J_A}} \tilde{Q}_0(\mathbf{i}, j_1, j_2, \tilde{\mathbf{i}}, j_3, j_4) \mathbf{1}_{\{c=0, 1 \leq t_0 \leq a, |\{j_1, j_2\} \cap \{j_3, j_4\}|=0\}} \right| \\
& \leq C \sum_{t_0=1}^a \sum_{(j_1, j_2), (j_3, j_4) \in J_A} |\sigma_{j_1, j_2} \sigma_{j_3, j_4}|^a = \sum_{t_0=1}^a n^{2a-t_0} |J_A|^2 O(\rho^{2a}).
\end{aligned}$$

**Case (3.2)** For  $1 \leq c \leq a$  and  $0 \leq t_c \leq a$ , we have  $|\{\mathbf{i}\} \cup \{\tilde{\mathbf{i}}\}| \leq 2a - t_c$ .

Then for given  $c \geq 1$ ,

$$\begin{aligned}
\text{(B.4.17)} \quad & \left| \sum_{\substack{\mathbf{i}, \tilde{\mathbf{i}} \in \mathcal{P}(n, a); \\ (j_1, j_2), (j_3, j_4) \in J_A}} \tilde{Q}_c(\mathbf{i}, j_1, j_2, \tilde{\mathbf{i}}, j_3, j_4) \mathbf{1}_{\{0 \leq t_c \leq a-c, |\{j_1, j_2\} \cap \{j_3, j_4\}| = 0\}} \right| \\
& \leq C \sum_{\substack{0 \leq r \leq c; \\ 0 \leq t_c \leq a-c}} n^{2a-t_c} \sum_{(j_1, j_2), (j_3, j_4) \in J_A} |\sigma_{j_1, j_2} \sigma_{j_3, j_4}|^a \\
& = \sum_{t_c=0}^{a-c} n^{2a-t_c} |J_A|^2 O(\rho^{2a}),
\end{aligned}$$

where we use the symmetricity of indexes.

Combining (B.4.12)–(B.4.17) above, and by (B.4.8) and (B.4.9) and  $F(a, c) = O(n^{-(a+c)})$ , we know

$$\begin{aligned}
\text{(B.4.18)} \quad & \text{var}(T_{1,a,2}) \\
& = \sum_{t_0=1}^a O(1) \frac{1}{n^{t_0}} |J_A| \times \{\rho^{2a} + \rho^{2(a-t_0)}\} \\
& \quad + \sum_{c=1}^a \sum_{t_c=0}^{a-c} \sum_{r=0}^c O(1) |J_A| \frac{1}{n^{2c+t_c}} \{\rho^{2(a-r)} + \rho^{2(a-t_c-r)}\} \\
& \quad + \sum_{t_0=1}^a O(1) \frac{1}{n^{t_0}} \max_{1 \leq j_1 \leq p} |J_{j_1}| \times |J_A| (\rho^{2a} + \rho^{2a-t_0}) \\
& \quad + \sum_{c=1}^a \sum_{t_c=0}^{a-c} \sum_{r=0}^c O(1) \frac{1}{n^{2c+t_c}} \max_{1 \leq j_1 \leq p} |J_{j_1}| |J_A| (\rho^{2a-t_c-r} + \rho^{2a-r}) \\
& \quad + \sum_{t_0=1}^a O(1) \frac{1}{n^{t_0}} |J_A|^2 \rho^{2a} + \sum_{c=1}^a \sum_{t_c=0}^{a-c} O(1) \frac{1}{n^{2c+t_c}} |J_A|^2 \rho^{2a}.
\end{aligned}$$

We then examine the six summed terms in the right hand side of (B.4.18) and show that they are  $o(p^2 n^{-a})$  respectively.

(1) For the first term in (B.4.18), as  $|J_A| \rho^a = O(p n^{-a/2})$ ,

$$n^{-t_0} |J_A| \rho^{2a} = n^{-t_0} |J_A|^{-1} |J_A|^2 \rho^{2a} = o(p^2 n^{-a}),$$

and

$$\begin{aligned}
n^{-t_0} |J_A| \rho^{2(a-t_0)} & = n^{-t_0} |J_A|^{1-2(a-t_0)/a} (|J_A| \rho^a)^{2(a-t_0)/a} \\
& = O(1) n^{-t_0} |J_A|^{-1+2t_0/a} (p n^{-a/2})^{2(a-t_0)/a} \\
& = O(1) p^2 n^{-a} |J_A|^{-1+t_0/a} (|J_A|/p^2)^{t_0/a} = o(p^2 n^{-a}),
\end{aligned}$$

where we use  $1 \leq t_0 \leq a$  and  $|J_A| = o(p^2)$  in the last equation.

(2) For the second term in (B.4.18), as  $r \leq c \leq a$  and  $|J_A| = o(p^2)$ ,

$$\begin{aligned} n^{-(2c+t_c)} |J_A| \rho^{2(a-r)} &= n^{-(2c+t_c)} |J_A|^{1-2(a-r)/a} (|J_A| \rho^a)^{2(a-r)/a} \\ &= O(1) p^2 n^{-a+r-2c-t_c} |J_A|^{-1+r/a} (|J_A|/p^2)^{r/a} \\ &= o(p^2 n^{-a}), \end{aligned}$$

and similarly as  $r \leq c \leq a$ ,  $t_c + r \leq a$  and  $c \geq 1$ ,

$$\begin{aligned} n^{-(2c+t_c)} |J_A| \rho^{2(a-t_c-r)} \\ &= O(1) p^2 n^{-a+t_c+r-2c-t_c} |J_A|^{-1+(t_c+r)/a} (|J_A|/p^2)^{(t_c+r)/a} \\ &= o(p^2 n^{-a}). \end{aligned}$$

(3) For the third term in (B.4.18), as  $1 \leq t_0 \leq a$ , and  $|J_A| \rho^a = O(pn^{-a/2})$ ,

$$n^{-t_0} \max_{1 \leq j_1 \leq p} |J_{j_1}| \times |J_A| \rho^{2a} = \frac{\max_{1 \leq j_1 \leq p} |J_{j_1}|}{n^{t_0} |J_A|} |J_A|^2 \rho^{2a} = o(p^2 n^{-a}),$$

and

$$\begin{aligned} &n^{-t_0} \max_{1 \leq j_1 \leq p} |J_{j_1}| \times |J_A| \rho^{2a-t_0} \\ &= n^{-t_0} \max_{1 \leq j_1 \leq p} |J_{j_1}| \times |J_A|^{1-(2a-t_0)/a} (|J_A| \rho^a)^{(2a-t_0)/a} \\ &= O(1) p^2 n^{-a-t_0/2} \max_{1 \leq j_1 \leq p} |J_{j_1}| \times |J_A|^{-1+t_0/a} p^{-t_0/a} \\ &= O(1) \frac{p^2}{n^{a+t_0/2}} \frac{\max_{1 \leq j_1 \leq p} |J_{j_1}|}{|J_A|} \left( \frac{|J_A|}{\max_{1 \leq j_1 \leq p} |J_{j_1}|} \frac{\max_{1 \leq j_1 \leq p} |J_{j_1}|}{p} \right)^{t_0/a} \\ &= O(1) \frac{p^2}{n^{a+t_0/2}} \left( \frac{\max_{1 \leq j_1 \leq p} |J_{j_1}|}{|J_A|} \right)^{1-t_0/a} \left( \frac{\max_{1 \leq j_1 \leq p} |J_{j_1}|}{p} \right)^{t_0/a} = o(p^2 n^{-a}), \end{aligned}$$

where in the last equation, we use  $1 \leq t_0 \leq a$ ,  $\max_{1 \leq j_1 \leq p} |J_{j_1}| \leq |J_A|$  and  $\max_{1 \leq j_1 \leq p} |J_{j_1}| \leq p$ .

(4) For the fourth term in (B.4.18),

$$\begin{aligned} &n^{-(2c+t_c)} \max_{1 \leq j_1 \leq p} |J_{j_1}| |J_A| \rho^{2a-t_c-r} \\ &= n^{-(2c+t_c)} \max_{1 \leq j_1 \leq p} |J_{j_1}| |J_A|^{1-(2a-t_c-r)/a} (|J_A| \rho^a)^{(2a-t_c-r)/a} \\ &= O(1) \frac{p^2}{n^a} \frac{1}{n^{2c+t_c/2-r/2}} \frac{\max_{1 \leq j_1 \leq p} |J_{j_1}|}{|J_A|} \left( \frac{|J_A|}{p} \right)^{(t_c+r)/a} \\ &= O(1) \frac{p^2}{n^a} \frac{1}{n^{2c+t_c/2-r/2}} \left( \frac{\max_{1 \leq j_1 \leq p} |J_{j_1}|}{|J_A|} \right)^{1-(t_c+r)/a} \left( \frac{\max_{1 \leq j_1 \leq p} |J_{j_1}|}{p} \right)^{(t_c+r)/a} \\ &= o(p^2 n^{-a}), \end{aligned}$$

where we obtain the last equation by noting that  $t_c + r \leq a$ ,  $r \leq c$ , and  $c \geq 1$ . Similarly, we have

$$\begin{aligned} & n^{-(2c+t_c)} \max_{1 \leq j_1 \leq p} |J_{j_1}| |J_A| \rho^{2a-r} \\ &= O(1) \frac{p^2}{n^a} \frac{1}{n^{2c+t_c-r/2}} \left( \frac{\max_{1 \leq j_1 \leq p} |J_{j_1}|}{|J_A|} \right)^{1-r/a} \left( \frac{\max_{1 \leq j_1 \leq p} |J_{j_1}|}{p} \right)^{r/a} \\ &= o(p^2 n^{-a}). \end{aligned}$$

(5) For the fifth and sixth terms in (B.4.18), as  $|J_A| \rho^a = O(pn^{-a/2})$ ,  $t_0 \geq 1$  and  $c \geq 1$ , we know

$$\frac{1}{n^{t_0}} |J_A|^2 \rho^{2a} = o(p^2 n^{-a}), \quad \text{and} \quad \frac{1}{n^{2c+t_c}} |J_A|^2 \rho^{2a} = o(p^2 n^{-a}).$$

B.4.2. *Proof of Lemma A.5.2 (on Page 10, Section A.5).* The proof is similar to Section B.1.2. In particular, Lemma A.5.2 shows that  $\text{var}\{\mathcal{U}(a)\} \simeq \text{var}(T_{U,a,1,1})$ . By the Cauchy-schwarz inequality,

$$\text{cov}\{\mathcal{U}(a)/\sigma(a), \mathcal{U}(b)/\sigma(b)\} = \text{E}\{T_{U,a,1,1} T_{U,b,1,1}\} / \{\sigma(a)\sigma(b)\} + o(1),$$

where we use  $\text{E}(T_{U,a,1,1}) = \text{E}(T_{U,b,1,1}) = 0$ . For two integers  $a \neq b$ , we next prove  $\text{E}(T_{U,a,1,1} T_{U,b,1,1}) = 0$ . Specifically,

$$\begin{aligned} & \text{E}(T_{U,a,1,1} T_{U,b,1,1}) \\ &= (P_a^n P_b^n)^{-1} \sum_{\substack{\mathbf{i} \in \mathcal{P}(n,a), \tilde{\mathbf{i}} \in \mathcal{P}(n,b); \\ (j_1, j_2), (j_3, j_4) \in J_A^c}} \text{E} \left( \prod_{k=1}^a x_{i_k, j_1} x_{i_k, j_2} \prod_{\tilde{k}=1}^b x_{\tilde{i}_{\tilde{k}}, j_3} x_{\tilde{i}_{\tilde{k}}, j_4} \right). \end{aligned}$$

Since  $a \neq b$ ,  $\{\mathbf{i}\} \neq \{\tilde{\mathbf{i}}\}$ . Assume without loss of generality that  $a < b$  and index  $i \in \{\tilde{\mathbf{i}}\}$  but  $i \notin \{\mathbf{i}\}$ . Then

$$\text{E} \left( \prod_{k=1}^a x_{i_k, j_1} x_{i_k, j_2} \prod_{\tilde{k}=1}^b x_{\tilde{i}_{\tilde{k}}, j_3} x_{\tilde{i}_{\tilde{k}}, j_4} \right) = \text{E}(x_{1, j_3} x_{1, j_4}) \times \text{E}(\text{other terms}) = 0,$$

where we use the  $\sigma_{j_1, j_2} = \sigma_{j_3, j_4} = 0$  for  $(j_1, j_2), (j_3, j_4) \in J_A^c$ . Therefore  $\text{cov}(T_{U,a,1,1}, T_{U,b,1,1}) = 0$  and the lemma is proved.



B.4.3. *Proof of Lemma A.5.3 (on Page 10, Section A.5).* We prove Lemma A.5.3 similarly as in Section B.1.5. By the Cauchy-Schwarz inequality, for some constant  $C$ ,

$$\text{var}\left(\sum_{k=1}^n \pi_{n,k}^2\right) \leq Cn^2 \max_{1 \leq k \leq n; 1 \leq r_1, r_2 \leq m} \text{var}(\mathbb{T}_{k, a_{r_1}, a_{r_2}}),$$

where  $c(n, a) = [a \times \{\sigma(a)P_a^n\}^{-1}]^2$  and for two finite integers  $a_1$  and  $a_2$ ,  $\mathbb{T}_{k, a_1, a_2} = \mathbb{E}_{k-1}(A_{n, k, a_1} A_{n, k, a_2})$ . In particular, when  $k < \max\{a_1, a_2\}$ ,  $\mathbb{T}_{k, a_1, a_2} = 0$ ; when  $k \geq \max\{a_1, a_2\}$ ,

$$\begin{aligned} \mathbb{T}_{k, a_1, a_2} &= \mathbb{E}_{k-1}(A_{n, k, a_1} A_{n, k, a_2}) \\ &= \sum_{\substack{\mathbf{i}^{(l)} \in \mathcal{P}(k-1, a_l-1), l=1, 2; \\ (j_1, j_2), (j_3, j_4) \in J_A^c}} \left\{ \prod_{l=1}^2 c(n, a_l) \right\}^{1/2} \mathbb{X}(k, \mathbf{i}^{(l)}, j_{2l-1}, j_{2l} : l = 1, 2) \end{aligned}$$

with

$$\mathbb{X}(k, \mathbf{i}^{(l)}, j_{2l-1}, j_{2l} : l = 1, 2) = \mathbb{E}\left(\prod_{t=1}^4 x_{k, j_t}\right) \prod_{l=1}^2 \prod_{t=1}^{a_l-1} (x_{i_t^{(l)}, j_{2l-1}} x_{i_t^{(l)}, j_{2l}}).$$

To prove  $\text{var}(\sum_{k=1}^n \pi_{n,k}^2) \rightarrow 0$ , it suffices to prove  $\text{var}(\mathbb{T}_{k, a_{r_1}, a_{r_2}}) = o(n^{-2})$  for any  $1 \leq r_1, r_2 \leq m$ . Without loss of generality, we consider two finite integers  $a_1$  and  $a_2$ , and prove  $\text{var}(\mathbb{T}_{k, a_1, a_2}) = o(n^{-2})$  when  $\max\{a_1, a_2\} \leq k \leq n$ .

To prove  $\text{var}(\mathbb{T}_{k, a_1, a_2}) = o(n^{-2})$ , we decompose  $\mathbb{T}_{k, a_1, a_2} = \sum_{M=2}^4 \mathbb{T}_{k, a_1, a_2, (M)}$ , where

$$\begin{aligned} \mathbb{T}_{k, a_1, a_2, (M)} &= \sum_{\substack{\mathbf{i}^{(l)} \in \mathcal{P}(k-1, a_l-1), l=1, 2; \\ (j_1, j_2), (j_3, j_4) \in J_A^c}} \mathbf{1}_{\{|\{j_1, j_2\} \cup \{j_3, j_4\}|=M\}} \\ &\quad \times \left\{ \prod_{l=1}^2 c(n, a_l) \right\}^{1/2} \mathbb{X}(k, \mathbf{i}^{(l)}, j_{2l-1}, j_{2l} : l = 1, 2). \end{aligned}$$

Here  $2 \leq M \leq 4$  because  $2 \leq |\{j_1, j_2\} \cup \{j_3, j_4\}| \leq 4$  when  $(j_1, j_2), (j_3, j_4) \in J_A^c$ . By the Cauchy-Schwarz inequality, to prove  $\text{var}(\mathbb{T}_{k, a_1, a_2}) = o(n^{-2})$ , it suffices to prove  $\text{var}(\mathbb{T}_{k, a_1, a_2, (M)}) = o(n^{-2})$  for  $M = 2, 3, 4$ . For easy presentation, we let  $a_3 = a_1$  and  $a_4 = a_2$ , and then

$$\begin{aligned} \mathbb{T}_{k, a_1, a_2, (M)}^2 &= \sum_{\substack{\mathbf{i}^{(l)} \in \mathcal{P}(k-1, a_l-1), l=1, 2, 3, 4; \\ (j_1, j_2), (j_3, j_4), (j_5, j_6), (j_7, j_8) \in J_A^c}} \mathbf{1}_{\left\{ \begin{array}{l} |\{j_1, j_2\} \cup \{j_3, j_4\}|=M, \\ |\{j_5, j_6\} \cup \{j_7, j_8\}|=M \end{array} \right\}} \\ &\quad \times \left\{ \prod_{l=1}^2 c(n, a_l) \right\} \times \mathbb{X}(k, \mathbf{i}^{(l)}, j_{2l-1}, j_{2l} : l = 1, 2, 3, 4), \end{aligned}$$

where

$$\begin{aligned} & \mathbb{X}(k, \mathbf{i}^{(l)}, j_{2l-1}, j_{2l} : l = 1, 2, 3, 4) \\ &= \mathbb{E} \left( \prod_{t=1}^4 x_{k, j_t} \right) \mathbb{E} \left( \prod_{t=5}^8 x_{k, j_t} \right) \left( \prod_{l=1}^4 \prod_{t=1}^{a_l-1} x_{i_t^{(l)}, j_{2l-1}} x_{i_t^{(l)}, j_{2l}} \right). \end{aligned}$$

$$\text{By } \text{var}\{\mathbb{T}_{k, a_1, a_2, (M)}\} = \mathbb{E}\{\mathbb{T}_{k, a_1, a_2, (M)}^2\} - \{\mathbb{E}(\mathbb{T}_{k, a_1, a_2, (M)})\}^2,$$

$$\begin{aligned} & \text{var}\{\mathbb{T}_{k, a_1, a_2, (M)}\} \\ &= \sum_{\substack{\mathbf{i}^{(l)} \in \mathcal{P}(k-1, a_l-1), l=1, 2, 3, 4; \\ (j_1, j_2), (j_3, j_4), (j_5, j_6), (j_7, j_8) \in J_A^c}} \mathbf{1}_{\left\{ \begin{array}{l} |\{j_1, j_2\} \cup \{j_3, j_4\}| = M, \\ |\{j_5, j_6\} \cup \{j_7, j_8\}| = M \end{array} \right\}} \left\{ \prod_{l=1}^2 c(n, a_l) \right\} \\ & \times \left[ \mathbb{E} \left\{ \mathbb{X}(k, \mathbf{i}^{(l)}, j_{2l-1}, j_{2l} : l = 1, 2, 3, 4) \right\} \right. \\ & \quad \left. - \mathbb{E} \left\{ \mathbb{X}(k, \mathbf{i}^{(l)}, j_{2l-1}, j_{2l} : l = 1, 2) \right\} \times \mathbb{E} \left\{ \mathbb{X}(k, \mathbf{i}^{(l)}, j_{2l-1}, j_{2l} : l = 3, 4) \right\} \right], \end{aligned}$$

where we similarly define

$$\mathbb{X}(k, \mathbf{i}^{(l)}, j_{2l-1}, j_{2l} : l = 3, 4) = \mathbb{E} \left( \prod_{t=5}^8 x_{k, j_t} \right) \prod_{l=3}^4 \prod_{t=1}^{a_l-1} (x_{i_t^{(l)}, j_{2l-1}} x_{i_t^{(l)}, j_{2l}}).$$

To prove  $\text{var}(\mathbb{T}_{k, a_1, a_2, (M)}) = o(n^{-2})$ , we examine the value of

$$\begin{aligned} \text{(B.4.19)} \quad & \mathbb{E} \left\{ \mathbb{X}(k, \mathbf{i}^{(l)}, j_{2l-1}, j_{2l} : l = 1, 2, 3, 4) \right\} \\ & - \mathbb{E} \left\{ \mathbb{X}(k, \mathbf{i}^{(l)}, j_{2l-1}, j_{2l} : l = 1, 2) \right\} \mathbb{E} \left\{ \mathbb{X}(k, \mathbf{i}^{(l)}, j_{2l-1}, j_{2l} : l = 3, 4) \right\}. \end{aligned}$$

We next show that when (B.4.19)  $\neq 0$ , the following two claims hold:

$$\text{(B.4.20)} \quad \textit{Claim 1: } (\{\mathbf{i}^{(1)}\} \cup \{\mathbf{i}^{(2)}\}) \cap (\{\mathbf{i}^{(3)}\} \cup \{\mathbf{i}^{(4)}\}) \neq \emptyset,$$

$$\textit{Claim 2: } |\cup_{l=1}^4 \{\mathbf{i}^{(l)}\}| \leq a_1 + a_2 - 2.$$

*Claim 1* can be straightforwardly seen from the definition (B.4.19). We then prove *Claim 2*. Note that  $\mathbb{E}\{\mathbb{X}(k, \mathbf{i}^{(l)}, j_{2l-1}, j_{2l} : l = 1, 2, 3, 4)\} \neq 0$  only when  $|\cup_{l=1}^4 \{\mathbf{i}^{(l)}\}| \leq a_1 + a_2 - 2$  following similar analysis to Section B.1.5.2. In addition, as  $\sigma_{j_1, j_2} = \sigma_{j_3, j_4} = 0$  when  $(j_1, j_2), (j_3, j_4) \in J_A^c$ , we know that  $\mathbb{E}\{\mathbb{X}(k, \mathbf{i}^{(l)}, j_{2l-1}, j_{2l} : l = 1, 2)\} \neq 0$  only when  $\{\mathbf{i}^{(1)}\} = \{\mathbf{i}^{(2)}\}$ ; as  $\sigma_{j_5, j_6} = \sigma_{j_7, j_8} = 0$ , we similarly know that  $\mathbb{E}\{\mathbb{X}(k, \mathbf{i}^{(l)}, j_{2l-1}, j_{2l} : l = 3, 4)\} \neq 0$  only when  $\{\mathbf{i}^{(3)}\} = \{\mathbf{i}^{(4)}\}$ . It follows that if  $|\cup_{l=1}^4 \{\mathbf{i}^{(l)}\}| > a_1 + a_2 - 2$ , (B.4.19) = 0.

Thus to evaluate  $\text{var}\{\mathbb{T}_{k,a_1,a_2,(M)}\}$ , it remains to consider (B.4.19) under the cases when  $(\{\mathbf{i}^{(1)}\} \cup \{\mathbf{i}^{(2)}\}) \cap (\{\mathbf{i}^{(3)}\} \cup \{\mathbf{i}^{(4)}\}) \neq \emptyset$  and  $|\cup_{l=1}^4 \{\mathbf{i}^{(l)}\}| \leq a_1 + a_2 - 2$ .

Given the two claims above, we examine  $\text{var}\{\mathbb{T}_{k,a_1,a_2,(M)}\}$  for  $M = 2, 3, 4$  respectively. To facilitate the discussion, we decompose  $\text{var}\{\mathbb{T}_{k,a_1,a_2,(M)}\} = \text{var}\{\mathbb{T}_{k,a_1,a_2,(M)}\}_{(1)} + \text{var}\{\mathbb{T}_{k,a_1,a_2,(M)}\}_{(2)}$ , where

$$\begin{aligned} & \text{var}\{\mathbb{T}_{k,a_1,a_2,(M)}\}_{(1)} \\ = & \sum_{\substack{\mathbf{i}^{(l)} \in \mathcal{P}(k-1, a_l-1), l=1,2,3,4; \\ (j_1, j_2), (j_3, j_4), (j_5, j_6), (j_7, j_8) \in J_A^c}} \mathbf{1}_{\left\{ \begin{array}{l} |\cup_{l=1}^4 \{\mathbf{i}^{(l)}\}| = a_1 + a_2 - 2; \\ |\{j_1, j_2\} \cup \{j_3, j_4\}| = M; \\ |\{j_5, j_6\} \cup \{j_7, j_8\}| = M \end{array} \right\}} \prod_{l=1}^2 c(n, a_l) \times (\text{B.4.19}), \end{aligned}$$

and

$$\begin{aligned} & \text{var}\{\mathbb{T}_{k,a_1,a_2,(M)}\}_{(2)} \\ = & \sum_{\substack{\mathbf{i}^{(l)} \in \mathcal{P}(k-1, a_l-1), l=1,2,3,4; \\ (j_1, j_2), (j_3, j_4), (j_5, j_6), (j_7, j_8) \in J_A^c}} \mathbf{1}_{\left\{ \begin{array}{l} |\cup_{l=1}^4 \{\mathbf{i}^{(l)}\}| < a_1 + a_2 - 2; \\ |\{j_1, j_2\} \cup \{j_3, j_4\}| = M; \\ |\{j_5, j_6\} \cup \{j_7, j_8\}| = M \end{array} \right\}} \prod_{l=1}^2 c(n, a_l) \times (\text{B.4.19}). \end{aligned}$$

We next consider  $M = 2, 3, 4$  in the following **Cases (1)–(3)**, respectively. We assume without loss of generality that  $a_1 \leq a_2$  in the following.

**Case (1):** When  $M = 2$ , by the definition of  $\mathbb{T}_{k,a_1,a_2,(M)}$ , we know  $\{j_1, j_2\} = \{j_3, j_4\}$ ,  $\{j_5, j_6\} = \{j_7, j_8\}$ , and  $|\{j_t : t = 1, \dots, 8\}| \leq 4$ . It follows that  $\text{var}\{\mathbb{T}_{k,a_1,a_2,(M)}\}_{(2)} = O\{\prod_{l=1}^2 c(n, a_l) p^4 n^{a_1+a_2-3}\} = o(n^{-2})$  by the boundedness of moments in Condition 2.1 and the definition of  $\text{var}\{\mathbb{T}_{k,a_1,a_2,(M)}\}_{(2)}$ .

We next prove  $\text{var}\{\mathbb{T}_{k,a_1,a_2,(M)}\}_{(1)} = o(n^{-2})$ . Recall that we consider  $|\cup_{l=1}^4 \{\mathbf{i}^{(l)}\}| = a_1 + a_2 - 2$  here by the construction of  $\text{var}\{\mathbb{T}_{k,a_1,a_2,(M)}\}_{(1)}$ . Suppose  $|\{\mathbf{i}^{(1)}\} \cap \{\mathbf{i}^{(2)}\}| = s$ , where  $s \leq a_1 - 1$ . Then symmetrically  $|\{\mathbf{i}^{(3)}\} \cap \{\mathbf{i}^{(4)}\}| = s$ . Further assume  $|\{\mathbf{i}^{(1)}\} \cap \{\mathbf{i}^{(3)}\}| = s_1$ , then  $|\{\mathbf{i}^{(2)}\} \cap \{\mathbf{i}^{(3)}\}| = a_1 - 1 - s - s_1$ ,  $|\{\mathbf{i}^{(1)}\} \cap \{\mathbf{i}^{(4)}\}| = a_1 - 1 - s - s_1$  and  $|\{\mathbf{i}^{(2)}\} \cap \{\mathbf{i}^{(4)}\}| = a_2 - a_1 + s_1$ . It follows that  $|\{(\{\mathbf{i}^{(1)}\} \cup \{\mathbf{i}^{(2)}\}) \cap (\{\mathbf{i}^{(3)}\} \cup \{\mathbf{i}^{(4)}\})\}| = a_1 + a_2 - 2 - 2s$ . Note that (B.4.19) = 0 if  $a_1 + a_2 - 2 - 2s = 0$ , which can only be achieved when  $a_1 = a_2$  and  $s = a_1 - 1$ . It remains to consider  $a_1 + a_2 - 2 - 2s \geq 1$ , that is,

$0 \leq s \leq A_0$ , where  $A_0 = (a_1 + a_2 - 3)/2$ . Given  $s$  and  $s_1$ , we have

$$(B.4.21) \quad (B.4.19) = \left\{ \mathbb{E} \left( \prod_{t=1,2,5,6} x_{1,j_t} \right) \right\}^{s_1} \left\{ \mathbb{E} \left( \prod_{t=3,4,7,8} x_{1,j_t} \right) \right\}^{a_2 - a_1 + s_1} \\ \times \left\{ \mathbb{E} \left( \prod_{t=3,4,5,6} x_{1,j_t} \right) \mathbb{E} \left( \prod_{t=1,2,7,8} x_{1,j_t} \right) \right\}^{a_1 - 1 - s - s_1} \\ \times \left\{ \mathbb{E} \left( \prod_{t=1,2,3,4} x_{1,j_t} \right) \mathbb{E} \left( \prod_{t=5,6,7,8} x_{1,j_t} \right) \right\}^{s+1}.$$

Under the considered **Case (1)**,  $\{j_1, j_2\} = \{j_3, j_4\}$  and  $\{j_5, j_6\} = \{j_7, j_8\}$ . If  $|\{j_t : t = 1, \dots, 8\}| \leq 3$ , we know by Condition 2.1,

$$(B.4.22) \quad \left| \sum_{\substack{(j_1, j_2), (j_3, j_4), \\ (j_5, j_6), (j_7, j_8) \in J_A^c}} (\mathbf{B.4.19}) \times \mathbf{1}_{|\{j_t: t=1, \dots, 8\}| \leq 3} \right| = O(p^3).$$

If  $|\{j_t : t = 1, \dots, 8\}| = 4$ ,  $\{j_1, j_2\} \cap \{j_5, j_6\} = \emptyset$ . By Conditions 2.1, A.1 and 2.5, we know  $\mathbb{E}(\prod_{t=1}^4 x_{1,j_t}) = \kappa_1 \sigma_{j_1, j_1} \sigma_{j_2, j_2} = O(1)$  and similarly  $\mathbb{E}(\prod_{t=5}^8 x_{1,j_t}) = O(1)$ . By (B.4.21), (B.4.19)  $\neq 0$  only if  $\mathbb{E}(\prod_{t=1,2,5,6} x_{1,j_t}) \neq 0$ . This induces  $(j_1, j_5), (j_2, j_6) \in J_A$  or  $(j_1, j_6), (j_2, j_5) \in J_A$ , and then (B.4.19)  $= O(\rho^{2(a_1+a_2-2s)})$ . By the symmetricity of  $j$  indexes, we have

$$(B.4.23) \quad \left| \sum_{(j_1, j_2), (j_3, j_4), (j_5, j_6), (j_7, j_8) \in J_A^c} (\mathbf{B.4.19}) \times \mathbf{1}_{|\{j_t: t=1, \dots, 8\}|=4} \right| \\ \leq C \sum_{(j_1, j_5), (j_2, j_6) \in J_A} \rho^{2(a_1+a_2-2-2s)} \leq C |J_A|^2 \rho^{2(a_1+a_2-2-2s)}.$$

By (B.4.22) and (B.4.23),

$$\text{var}\{\mathbb{T}_{k, a_1, a_2, (M)}\}_{(1)} = \sum_{s=0}^{A_0} O\left\{p^3 + |J_A|^2 \rho^{2(a_1+a_2-2-2s)}\right\} n^{a_1+a_2-2} \prod_{l=1}^2 c(n, a_l).$$

Note that  $O(p^3 n^{a_1+a_2-2}) \prod_{l=1}^2 c(n, a_l) = o(n^{-2})$ , and

$$(B.4.24) \quad |J_A|^2 \rho^{2(a_1+a_2-2-2s)} n^{a_1+a_2-2} c(n, a_1) c(n, a_2) \\ = O(1) p^{-4} n^{-2} |J_A|^{2-\frac{2(a_1+a_2-2-2s)}{a_1+a_2}} (|J_A| \rho^{a_1} \times |J_A| \rho^{a_2})^{\frac{2(a_1+a_2-2-2s)}{a_1+a_2}} \\ = O(1) |J_A|^{2-\frac{2(a_1+a_2-2-2s)}{a_1+a_2}} p^{\frac{2(a_1+a_2-2-2s)}{a_1+a_2}-4} n^{-(a_1+a_2-2-2s)-2} \\ = O(1) |J_A|^{-\frac{a_1+a_2-2-2s}{a_1+a_2}} (|J_A|/p^2)^{2-\frac{a_1+a_2-2-2s}{a_1+a_2}} n^{-(a_1+a_2-2-2s)-2} \\ = o(n^{-2}).$$

Therefore  $\text{var}\{\mathbb{T}_{k,a_1,a_2,(M)}\}_{(1)} = o(n^{-2})$ .

**Case (2):** When  $M = 3$ , we assume without loss of generality that  $j_1 = j_3$  and  $j_5 = j_7$ , then

$$(B.4.25) \quad \{j_1, j_2, j_3, j_4\} = \{j_1, j_2, j_4\} \quad \text{and} \quad \{j_5, j_6, j_7, j_8\} = \{j_5, j_6, j_8\}.$$

It follows that  $E(\prod_{t=1}^4 x_{1,j_t}) = \kappa_1 \sigma_{j_1, j_1} \sigma_{j_2, j_4}$  and  $E(\prod_{t=5}^8 x_{1,j_t}) = \kappa_1 \sigma_{j_5, j_5} \sigma_{j_6, j_8}$ , which are 0 when  $(j_2, j_4)$  and  $(j_6, j_8) \in J_A^c$ ; and are  $O(\rho)$  when  $(j_2, j_4)$  and  $(j_6, j_8) \in J_A$ . This suggests that if (B.4.19)  $\neq 0$ ,  $(j_2, j_4)$  and  $(j_6, j_8) \in J_A$ .

We first examine  $\text{var}\{\mathbb{T}_{k,a_1,a_2,(3)}\}_{(1)}$ , which is the part of summation in  $\text{var}\{\mathbb{T}_{k,a_1,a_2,(3)}\}$  when  $|\cup_{l=1}^4 \{\mathbf{i}^{(l)}\}| = a_1 + a_2 - 2$ . Recall that the two claims in (B.4.20) also hold here. Similarly to **Case (1)** above, we still assume  $|\{\mathbf{i}^{(1)}\} \cap \{\mathbf{i}^{(2)}\}| = s$ , and  $|\{\mathbf{i}^{(1)}\} \cap \{\mathbf{i}^{(3)}\}| = s_1$ , then (B.4.21) holds. We next discuss several sub-cases based on the size of the set  $\{j_t : t = 1, \dots, 8\}$ .

**Case (2.1):** When  $|\{j_t : t = 1, \dots, 8\}| = 6$ , we know  $\{j_1, j_2, j_3, j_4\} \cap \{j_5, j_6, j_7, j_8\} = \emptyset$  by (B.4.25). Then by (B.4.21), we know if (B.4.19)  $\neq 0$ , then  $(j_2, j_4), (j_6, j_8), (j_1, j_5), (j_2, j_6) \in J_A$  or  $(j_2, j_4), (j_6, j_8), (j_1, j_6), (j_2, j_5) \in J_A$ . Thus by the symmetricity of the  $j$  indexes, we have

$$\sum_{\substack{(j_1, j_2), (j_3, j_4), \\ (j_5, j_6), (j_7, j_8) \in J_A^c}} \mathbf{1}_{(B.4.19) \neq 0} \times \mathbf{1}_{|\{j_t: t=1, \dots, 8\}|=6} \leq C \sum_{\substack{(j_1, j_5), (j_2, j_6), \\ (j_2, j_4), (j_6, j_8) \in J_A}} 1 \leq C |J_A|^3.$$

By Conditions A.1 and 2.5, (B.4.19)  $= O(\rho^{\tilde{A}_1})$ , where  $\tilde{A}_1 = 2(a_1 + a_2 - 2 - 2s) + 2(s + 1) = 2(a_1 + a_2) - 2(s + 1)$ . Thus

$$\left| \sum_{(j_1, j_2), (j_3, j_4), (j_5, j_6), (j_7, j_8) \in J_A^c} (B.4.19) \mathbf{1}_{|\{j_t: t=1, \dots, 8\}|=6} \right| = O(|J_A|^3 \rho^{\tilde{A}_1}).$$

**Case (2.2):** When  $|\{j_t : t = 1, \dots, 8\}| = 5$ , recall that we assume (B.4.25), where  $j_1 = j_3$  and  $j_5 = j_7$  without loss of generality. If we further assume  $j_1 = j_5$ ,  $\{j_t : t = 1, \dots, 8\} = \{j_1, j_2, j_4, j_6, j_8\}$ . Then for (B.4.19)  $\neq 0$ ,  $E(\prod_{t=1,2,3,4} x_{1,j_t}) \times E(\prod_{t=5,6,7,8} x_{1,j_t}) \neq 0$ , then  $(j_2, j_4), (j_6, j_8) \in J_A$  holds. In addition, under this case, (B.4.19)  $= O\{\rho^{(a_1+a_2-2-2s)+2(s+1)}\} = O(\rho^{a_1+a_2})$ , and we have

$$\left| \sum_{(j_1, j_2), (j_3, j_4), (j_5, j_6), (j_7, j_8) \in J_A^c} \mathbf{1}_{(B.4.19) = O(\rho^{a_1+a_2}), |\{j_t: t=1, \dots, 8\}|=5} \right| = O(p |J_A|^2).$$

If given  $j_1 = j_3$  and  $j_5 = j_7$ , instead, assume  $j_1 \neq j_5$ . We have  $j_1 \neq j_2$ ,  $j_1 \neq j_4$  and  $j_1 \neq j_5$ . Then for (B.4.19)  $\neq 0$ , by discussing different cases of  $j$  indexes, we know that (B.4.19) achieves the order between  $O(\rho^{\tilde{A}_1})$  and  $O(\rho^{\tilde{A}_2})$  where  $\tilde{A}_1$  is defined as above and  $\tilde{A}_2 = 2(s+1) + (1+2) \times (a_1 + a_2 - 2s - 2)/2 = 3(a_1 + a_2)/2 - (s+1)$ . Moreover, we have

$$\left| \sum_{\substack{(j_1, j_2), (j_3, j_4), \\ (j_5, j_6), (j_7, j_8) \in J_A^c}} \mathbf{1}_{\{(B.4.19)=O(\rho^u), \tilde{A}_2 \leq u \leq \tilde{A}_1, |\{j_t: t=1, \dots, 8\}|=5\}} \right| = O(D_{\max} |J_A|^2).$$

In summary,

$$\begin{aligned} & \left| \sum_{(j_1, j_2), (j_3, j_4), (j_5, j_6), (j_7, j_8) \in J_A^c} (B.4.19) \times \mathbf{1}_{|\{j_t: t=1, \dots, 8\}|=5} \right| \\ &= O(D_{\max} |J_A|^2 \rho^{\tilde{A}_1}) + O(D_{\max} |J_A|^2 \rho^{\tilde{A}_2}) + O(p |J_A|^2 \rho^{a_1+a_2}). \end{aligned}$$

**Case (2.3):** When  $|\{j_t : t = 1, \dots, 8\}| = 4$ , similarly as case (2.3), we can discuss  $j_1 = j_5$  and  $j_1 \neq j_5$  respectively. When  $j_1 = j_5$ , we note that (B.4.19) can achieve the orders between  $O(\rho^{a_1+a_2})$  and  $O(\rho^{\tilde{A}_3})$  with  $\tilde{A}_3 = (a_1 + a_2 - 2 - 2s)/2 + 2(s+1) = (a_1 + a_2)/2 + s + 1$ . Moreover,

$$\left| \sum_{\substack{(j_1, j_2), (j_3, j_4), \\ (j_5, j_6), (j_7, j_8) \in J_A^c}} \mathbf{1}_{(B.4.19)=O(\rho^u), \tilde{A}_3 \leq u \leq a_1+a_2, |\{j_t: t=1, \dots, 8\}|=4} \right| = O(p D_{\max} |J_A|).$$

In addition, when  $j_1 \neq j_5$ , we note that (B.4.19) can achieve the order between  $O(\rho^{a_1+a_2})$  and  $O(\rho^{\tilde{A}_1})$ . Under this case,

$$\left| \sum_{\substack{(j_1, j_2), (j_3, j_4), \\ (j_5, j_6), (j_7, j_8) \in J_A^c}} \mathbf{1}_{(B.4.19)=O(\rho^u), \tilde{A}_4 \leq u \leq a_1+a_2, |\{j_t: t=1, \dots, 8\}|=4} \right| = O(|J_A|^2).$$

In summary, by  $|J_A| \leq p D_{\max}$ ,

$$\begin{aligned} & \left| \sum_{(j_1, j_2), (j_3, j_4), (j_5, j_6), (j_7, j_8) \in J_A^c} (B.4.19) \times \mathbf{1}_{|\{j_t: t=1, \dots, 8\}|=4} \right| \\ &= O(p D_{\max} |J_A| \rho^{\tilde{A}_3}) + O(p D_{\max} |J_A| \rho^{a_1+a_2}) + O(|J_A|^2 \rho^{\tilde{A}_1}). \end{aligned}$$

**Case (2.4):** When  $|\{j_t : t = 1, \dots, 8\}| \leq 3$ , we know by Condition 2.1,

$$\left| \sum_{(j_1, j_2), (j_3, j_4), (j_5, j_6), (j_7, j_8) \in J_A^c} (B.4.19) \times \mathbf{1}_{|\{j_t: t=1, \dots, 8\}| \leq 3} \right| = O(p^3).$$

In summary, combining Cases (2.1)–(2.4) above, we know

$$\begin{aligned}
\text{(B.4.26)} \quad & \text{var}\{\mathbb{T}_{k,a_1,a_2,(3)}\}_{(1)} \\
&= \prod_{l=1}^2 c(n, a_l) n^{a_1+a_2-2} \sum_{s=0}^{A_0} \left\{ O(p^3) + O(|J_A|^3 \rho^{\tilde{A}_1}) \right. \\
&\quad + O(D_{\max} |J_A|^2 \rho^{\tilde{A}_1}) + O(D_{\max} |J_A|^2 \rho^{\tilde{A}_2}) + O(p |J_A|^2 \rho^{a_1+a_2}) \\
&\quad \left. + O(p D_{\max} |J_A| \rho^{\tilde{A}_3}) + O(p D_{\max} |J_A| \rho^{a_1+a_2}) + O(|J_A|^2 \rho^{\tilde{A}_1}) \right\},
\end{aligned}$$

where  $\tilde{A}_1 = 2(a_1 + a_2) - 2(s + 1)$ ,  $\tilde{A}_2 = 3(a_1 + a_2)/2 - (s + 1)$ , and  $\tilde{A}_3 = (a_1 + a_2)/2 + s + 1$ .

Note that

$$\begin{aligned}
& \prod_{l=1}^2 c(n, a_l) \times n^{a_1+a_2-2} |J_A|^3 \rho^{\tilde{A}_1} \\
&= p^{-4} n^{-2} |J_A|^3 \rho^{2(a_1+a_2-s-1)} \\
\text{(B.4.27)} \quad &= p^{-4} n^{-2} (|J_A| \rho^{a_1} \times |J_A| \rho^{a_2})^{\frac{2(a_1+a_2-s-1)}{a_1+a_2}} |J_A|^{3-\frac{4(a_1+a_2-s-1)}{a_1+a_2}} \\
\text{(B.4.28)} \quad &= O(1) n^{-2} p^{\frac{4(a_1+a_2-s-1)}{a_1+a_2}-4} n^{-(a_1+a_2-s-1)} |J_A|^{-1+\frac{4(s+1)}{a_1+a_2}} \\
&= O(1) n^{-2} p^{-\frac{4(s+1)}{a_1+a_2}} n^{-(a_1+a_2-s-1)} |J_A|^{-1+\frac{4(s+1)}{a_1+a_2}} \\
&= O(1) n^{-2} (|J_A|/p^2)^{\frac{2(s+1)}{a_1+a_2}} |J_A|^{-1+\frac{2(s+1)}{a_1+a_2}} \\
&= o(n^2),
\end{aligned}$$

where from (B.4.27) to (B.4.28), we use  $|J_A| \rho^a = O(pn^{-a/2})$ , and in the last equation, we use  $2(s+1) \leq a_1 + a_2 - 1$ . Following similar analysis, we know that all the terms in (B.4.26) are  $o(n^{-2})$  and  $\text{var}\{\mathbb{T}_{k,a_1,a_2,(3)}\}_{(1)} = o(n^{-2})$ .

We next examine  $\text{var}\{\mathbb{T}_{k,a_1,a_2,(3)}\}_{(2)}$ . Note that if (B.4.19)  $\neq 0$ ,  $(j_2, j_4)$  and  $(j_6, j_8) \in J_A$ . We can discuss different cases of  $\{j_1, \dots, j_8\}$  similarly as above. Then by Conditions 2.5 and A.1, as  $\rho = O(|J_A|^{-1/a_t} p^{1/a_t} n^{-1/2})$  for  $t = 1, 2$ , we have  $\sum_{(j_1, j_2), (j_3, j_4), (j_5, j_6), (j_7, j_8) \in J_A^c} \text{(B.4.19)} = O(p^4)$ . Given that  $|\cup_{l=1}^4 \{\mathbf{i}^{(l)}\}| < a_1 + a_2 - 2$  in  $\text{var}\{\mathbb{T}_{k,a_1,a_2,(3)}\}_{(2)}$ , we obtain  $\text{var}\{\mathbb{T}_{k,a_1,a_2,(3)}\}_{(2)} = \prod_{l=1}^2 c(n, a_l) \times O(p^4 n^{a_1+a_2-3}) = o(n^{-2})$ .

In summary, we have  $\text{var}\{\mathbb{T}_{k,a_1,a_2,(3)}\} = o(n^{-2})$ .

**Case (3):** When  $M = 4$ , we consider  $j_1 \neq j_2 \neq j_3 \neq j_4$  and  $j_5 \neq j_6 \neq$

$j_7 \neq j_8$  under this case. Since  $\sigma_{j_1, j_2} = \sigma_{j_3, j_4} = \sigma_{j_5, j_6} = \sigma_{j_7, j_8} = 0$ ,

$$\begin{aligned} \mathbb{E}(x_{1, j_1} x_{1, j_2} x_{1, j_3} x_{1, j_4}) &= \kappa_1(\sigma_{j_1, j_3} \sigma_{j_2, j_4} + \sigma_{j_1, j_4} \sigma_{j_2, j_3}), \\ \mathbb{E}(x_{1, j_5} x_{1, j_6} x_{1, j_7} x_{1, j_8}) &= \kappa_1(\sigma_{j_5, j_7} \sigma_{j_6, j_8} + \sigma_{j_5, j_8} \sigma_{j_6, j_7}), \end{aligned}$$

which are  $O(\rho^2)$ . Following similar analysis to **Case (2)**, we can examine the different cases when  $|\{j_t : t = 1, \dots, 8\}|$  is between 4 and 8, and obtain,

$$\begin{aligned} \text{(B.4.29)} \quad & \text{var}\{\mathbb{T}_{k, a_1, a_2, (4)}\}_{(1)} \\ &= O(1) \prod_{l=1}^2 c(n, a_l) \times n^{a_1+a_2-2} \sum_{s=0}^{A_0} \left[ |J_A|^2 \rho^{4(s+1)} \right. \\ & \quad + D_{\max} |J_A|^2 \rho^{4(s+1)} \left( \rho^{a_1-1-s} + \rho^{a_2-1-s} \right) \\ & \quad + \max\{|J_A|, D_{\max}^2\} \times |J_A|^2 \rho^{4(s+1)} \left( \rho^{2(a_1-1-s)} + \rho^{2(a_2-1-s)} \right) \\ & \quad + D_{\max} |J_A|^3 \left( \rho^{2(a_1+a_2)-(a_1-1-s)} + \rho^{2(a_1+a_2)-(a_2-1-s)} \right) \\ & \quad \left. + |J_A|^4 \rho^{2(a_1+a_2)} \right]. \end{aligned}$$

Note that  $\prod_{l=1}^2 c(n, a_l) n^{a_1+a_2-2} |J_A|^4 \rho^{2(a_1+a_2)} = O(1) p^{-4} n^{-2} p^4 n^{-(a_1+a_2)} = o(n^{-2})$ . Moreover,

$$\begin{aligned} \text{(B.4.30)} \quad & \prod_{l=1}^2 c(n, a_l) \times n^{a_1+a_2-2} D_{\max} |J_A|^2 \rho^{4(s+1)} \left( \rho^{a_1-1-s} + \rho^{a_2-1-s} \right) \\ &= p^{-4} n^{-2} D_{\max} |J_A|^2 \left( \rho^{a_1+3(s+1)} + \rho^{a_2+3(s+1)} \right). \end{aligned}$$

To show (B.4.30) =  $o(n^{-2})$  by symmetricity, it suffices to show for any integer  $a_1$ ,  $p^{-4} D_{\max} |J_A|^2 \rho^{a_1+3(s+1)} = o(1)$ .

$$\begin{aligned} & p^{-4} D_{\max} |J_A|^2 \rho^{a_1+3(s+1)} \\ \text{(B.4.31)} \quad &= p^{-4} D_{\max} (|J_A| \rho^{a_1})^{\frac{a_1+3(s+1)}{a_1}} |J_A|^{2-\frac{a_1+3(s+1)}{a_1}} \\ \text{(B.4.32)} \quad &= O(1) p^{-4} D_{\max} (pn^{-a_1/2})^{\frac{a_1+3(s+1)}{a_1}} |J_A|^{2-\frac{a_1+3(s+1)}{a_1}} \\ &= O(1) n^{-\frac{a_1+3(s+1)}{2}} (|J_A|/p^2)^{1-\frac{(s+1)}{a_1}} \\ & \quad \times (D_{\max}/p)^{1-\frac{s+1}{a_1}} (D_{\max}/|J_A|)^{\frac{s+1}{a_1}} |J_A|^{-\frac{s+1}{a_1}} \\ &= o(1), \end{aligned}$$

where from (B.4.31) to (B.4.32), we use  $|J_A| \rho^{a_1} = O(pn^{-a_1/2})$ , and in the last equation we use  $|J_A| = o(p^2)$ ,  $D_{\max} \leq p$  and  $D_{\max} \leq |J_A|$ . For other terms



in (B.4.29), similar analysis can be applied and we have  $\text{var}\{\mathbb{T}_{k,a_1,a_2,(4)}\}_{(1)} = o(n^{-2})$ .

In addition, similarly to the analysis of  $\text{var}\{\mathbb{T}_{k,a_1,a_2,(3)}\}_{(2)}$ , by Conditions 2.5 and A.1, we still have  $\sum_{(j_1,j_2),(j_3,j_4),(j_5,j_6),(j_7,j_8) \in J_A^c} (\text{B.4.19}) = O(p^4)$ . Since  $|\cup_{l=1}^4 \{\mathbf{i}^{(l)}\}| < a_1 + a_2 - 2$  in  $\text{var}\{\mathbb{T}_{k,a_1,a_2,(4)}\}_{(2)}$  by construction, we obtain  $\text{var}\{\mathbb{T}_{k,a_1,a_2,(4)}\}_{(2)} = \prod_{l=1}^2 c(n, a_l) \times O\{p^4 n^{a_1+a_2-3}\} = o(n^{-2})$ . In summary,  $\text{var}\{\mathbb{T}_{k,a_1,a_2,(4)}\} = o(n^{-2})$  is proved.

B.4.4. *Proof of Lemma A.5.4 (on Page 11, Section A.5).* Similarly to Section B.1.6,

$$\sum_{k=1}^n \mathbb{E}(D_{n,k}^4) = \sum_{k=1}^n \sum_{1 \leq r_1, r_2, r_3, r_4 \leq m} \prod_{l=1}^4 t_{r_l} \times \mathbb{E}\left(\prod_{l=1}^4 A_{n,k,a_{r_l}}\right),$$

where we use the redefined notation in Section A.5. To prove Lemma A.2.6, it suffices to show that for given  $1 \leq k \leq n$  and  $1 \leq r_1, r_2, r_3, r_4 \leq m$ , we have  $\mathbb{E}(\prod_{l=1}^4 A_{n,k,a_{r_l}}) = o(n^{-1})$ . Moreover by the Cauchy-Schwarz inequality, it suffices to show  $\mathbb{E}(A_{n,k,a}^4) = o(n^{-1})$  for  $a \in \{a_1, \dots, a_m\}$ . Following (B.1.61), we have  $A_{n,k,a} = 0$  when  $k < a$ ; and when  $k \geq a$ ,

$$\mathbb{E}(A_{n,k,a}^4) = c^2(n, a) \sum_{\substack{\mathbf{i}^{(l)} \in \mathcal{P}(k-1, a-1), l=1,2,3,4; \\ (j_1, j_2), (j_3, j_4), (j_5, j_6), (j_7, j_8) \in J_A^c}} Q^*(\mathbf{i}^{(1)}, \mathbf{i}^{(2)}, \mathbf{i}^{(3)}, \mathbf{i}^{(4)}, \mathbf{j}_8),$$

where  $\mathbf{i}^{(l)} = (i_1^{(l)}, \dots, i_a^{(l)})$  represents tuples  $1 \leq i_1^{(l)} \neq \dots \neq i_a^{(l)} \leq n$ , and

$$Q^*(\mathbf{i}^{(1)}, \mathbf{i}^{(2)}, \mathbf{i}^{(3)}, \mathbf{i}^{(4)}, \mathbf{j}_8) = \mathbb{E}\left(\prod_{r=1}^8 x_{k,j_r}\right) \mathbb{E}\left(\prod_{l=1}^4 \prod_{t=1}^{a-1} x_{i_t^{(l)}, j_{2l-1}} x_{i_t^{(l)}, j_{2l}}\right).$$

As  $c(n, a) = \Theta(p^{-1} n^{-a/2})$ , to prove  $\mathbb{E}(A_{n,k,a}^4) = o(n^{-1})$ , it suffices to show

$$\sum_{\substack{\mathbf{i}^{(l)} \in \mathcal{P}(k-1, a-1), l=1,2,3,4; \\ (j_1, j_2), (j_3, j_4), (j_5, j_6), (j_7, j_8) \in J_A^c}} Q^*(\mathbf{i}^{(1)}, \mathbf{i}^{(2)}, \mathbf{i}^{(3)}, \mathbf{i}^{(4)}, \mathbf{j}_8) = o(p^4 n^{2a-1}).$$

Since  $\sigma_{j_1, j_2} = 0$  if  $(j_1, j_2) \in J_A^c$ , then similarly to Section B.1.6, we have  $Q^*(\mathbf{i}^{(1)}, \mathbf{i}^{(2)}, \mathbf{i}^{(3)}, \mathbf{i}^{(4)}, \mathbf{j}_8) \neq 0$  only when  $|\cup_{l=1}^4 \{\mathbf{i}^{(l)}\}| \leq 2(a-1)$ , and similarly to (B.1.65),

$$\sum_{\mathbf{i}^{(l)} \in \mathcal{P}(k-1, a-1), l=1, \dots, 4} Q^*(\mathbf{i}^{(1)}, \mathbf{i}^{(2)}, \mathbf{i}^{(3)}, \mathbf{i}^{(4)}, \mathbf{j}_8) = O(n^{2a-2}).$$

It then remains to show

$$(B.4.33) \quad \sum_{(j_1, j_2), (j_3, j_4), (j_5, j_6), (j_7, j_8) \in J_A^c} Q^*(\mathbf{i}^{(1)}, \mathbf{i}^{(2)}, \mathbf{i}^{(3)}, \mathbf{i}^{(4)}, \mathbf{j}_8) = O(p^4).$$

We next prove by discussing  $|\{j_t : t = 1, \dots, 8\}|$  and the corresponding value of  $Q^*(\mathbf{i}^{(1)}, \mathbf{i}^{(2)}, \mathbf{i}^{(3)}, \mathbf{i}^{(4)}, \mathbf{j}_8)$ . By Condition A.1,  $Q^*(\mathbf{i}^{(1)}, \mathbf{i}^{(2)}, \mathbf{i}^{(3)}, \mathbf{i}^{(4)}, \mathbf{j}_8)$  can be written as certain linear combination of  $\prod_{t=1}^{4a} (\sigma_{j_{g_{2t-1}}, j_{g_{2t}}})$ , where  $j_{g_{2t-1}} \neq j_{g_{2t}}$  and  $(g_1, \dots, g_{8a})$  contain  $a$  number of  $1, \dots, 8$  respectively. If  $|\{j_t : t = 1, \dots, 8\}| \leq 4$ , by Condition 2.1,

$$\sum_{(j_1, j_2), (j_3, j_4), (j_5, j_6), (j_7, j_8) \in J_A^c} Q^*(\mathbf{i}^{(1)}, \mathbf{i}^{(2)}, \mathbf{i}^{(3)}, \mathbf{i}^{(4)}, \mathbf{j}_8) \times \mathbf{1}_{\{|\{j_t : t=1, \dots, 8\}| \leq 4\}} = O(p^4).$$

If  $|\{j_t : t = 1, \dots, 8\}| = 5$ , note that for  $j_1 \neq j_2$ ,  $\sigma_{j_1, j_2} \neq 0$  only when  $(j_1, j_2) \in J_A$ , then

$$\begin{aligned} & \left| \sum_{(j_1, j_2), (j_3, j_4), (j_5, j_6), (j_7, j_8) \in J_A^c} Q^*(\mathbf{i}^{(1)}, \mathbf{i}^{(2)}, \mathbf{i}^{(3)}, \mathbf{i}^{(4)}, \mathbf{j}_8) \times \mathbf{1}_{\{|\{j_t : t=1, \dots, 8\}| = 5\}} \right| \\ & \leq C \sum_{\substack{1 \leq j_1, j_2, j_5 \leq p, \\ (j_6, j_8) \in J_A}} \sigma_{j_1, j_1}^a \sigma_{j_2, j_2}^a \sigma_{j_5, j_5}^a \sigma_{j_6, j_8}^a = O(p^3 |J_A| \rho^a) = o(p^4), \end{aligned}$$

where in the last equation, we use  $|J_A| \rho^a = O(pn^{-a/2})$ . In addition, similarly, if  $|\{j_t : t = 1, \dots, 8\}| = 6$ ,

$$\begin{aligned} & \left| \sum_{(j_1, j_2), (j_3, j_4), (j_5, j_6), (j_7, j_8) \in J_A^c} Q^*(\mathbf{i}^{(1)}, \mathbf{i}^{(2)}, \mathbf{i}^{(3)}, \mathbf{i}^{(4)}, \mathbf{j}_8) \times \mathbf{1}_{\{|\{j_t : t=1, \dots, 8\}| = 6\}} \right| \\ & \leq C \sum_{\substack{1 \leq j_1, j_2 \leq p, \\ (j_5, j_7), (j_6, j_8) \in J_A}} \sigma_{j_1, j_1}^a \sigma_{j_2, j_2}^a \sigma_{j_5, j_7}^a \sigma_{j_6, j_8}^a = O(p^2 |J_A|^2 \rho^{2a}) = o(p^4). \end{aligned}$$

If  $|\{j_t : t = 1, \dots, 8\}| = 7$ ,

$$\begin{aligned} & \left| \sum_{(j_1, j_2), (j_3, j_4), (j_5, j_6), (j_7, j_8) \in J_A^c} Q^*(\mathbf{i}^{(1)}, \mathbf{i}^{(2)}, \mathbf{i}^{(3)}, \mathbf{i}^{(4)}, \mathbf{j}_8) \times \mathbf{1}_{\{|\{j_t : t=1, \dots, 8\}| = 7\}} \right| \\ & \leq C \sum_{\substack{1 \leq j_1 \leq p, \\ (j_2, j_4), (j_5, j_7), (j_6, j_8) \in J_A}} \sigma_{j_1, j_1}^a \sigma_{j_2, j_4}^a \sigma_{j_5, j_7}^a \sigma_{j_6, j_8}^a = O(p |J_A|^3 \rho^{3a}) = o(p^4). \end{aligned}$$

If  $|\{j_t : t = 1, \dots, 8\}| = 8$ ,

$$\begin{aligned} & \left| \sum_{(j_1, j_2), (j_3, j_4), (j_5, j_6), (j_7, j_8) \in J_A^c} Q^*(\mathbf{i}^{(1)}, \mathbf{i}^{(2)}, \mathbf{i}^{(3)}, \mathbf{i}^{(4)}, \mathbf{j}_8) \times \mathbf{1}_{\{|\{j_t : t=1, \dots, 8\}| = 8\}} \right| \\ & \leq C \sum_{(j_1, j_3), (j_2, j_4), (j_5, j_7), (j_6, j_8) \in J_A} \sigma_{j_1, j_3}^a \sigma_{j_2, j_4}^a \sigma_{j_5, j_7}^a \sigma_{j_6, j_8}^a = O(|J_A|^4 \rho^{4a}) = o(p^4). \end{aligned}$$

In summary, (B.4.33) is obtained and Lemma A.5.4 is proved.  $\square$

**B.5. Lemmas for the proof of Theorem 4.1.** In this section, we prove Lemma A.9.1 on Page 19, where we prove  $\text{var}(\sum_{k=1}^n \pi_{n,k}^2) \rightarrow 0$  and  $\sum_{k=1}^n \mathbb{E}(D_{n,k}^4) \rightarrow 0$  in the following Sections B.5.1.1 and B.5.1.2, respectively.

B.5.1. *Proof of Lemma A.9.1 (on Page 19, Section A.9).*

B.5.1.1. *Proof of  $\text{var}(\sum_{k=1}^n \pi_{n,k}^2) \rightarrow 0$ .* Similarly to Section B.1.5,  $D_{n,k} = \sum_{r=1}^m t_r A_{n,k,a_r}$ , and then  $\pi_{n,k}^2 = \sum_{1 \leq r_1, r_2 \leq m} t_{r_1} t_{r_2} \mathbb{E}_{k-1}(A_{n,k,a_{r_1}} A_{n,k,a_{r_2}})$ . Note that by the Cauchy-Schwarz inequality, for some constant  $C$ ,

$$\text{var}\left(\sum_{k=1}^n \pi_{n,k}^2\right) \leq Cn^2 \max_{1 \leq k \leq n; 1 \leq r_1, r_2 \leq m} \text{var}(\mathbb{T}_{k,a_{r_1},a_{r_2}}),$$

where  $c(n, a) = [a \times \{\sigma(a)P_a^n\}^{-1}]^2$  and for two integers  $a_1$  and  $a_2$  we still define  $\mathbb{T}_{k,a_1,a_2} = \mathbb{E}_{k-1}(A_{n,k,a_1} A_{n,k,a_2})$ . In particular, when  $k < \max\{a_1, a_2\}$ ,  $\mathbb{T}_{k,a_1,a_2} = 0$ ; when  $k \geq \max\{a_1, a_2\}$ ,

$$\begin{aligned} \mathbb{T}_{k,a_1,a_2} &= \mathbb{E}_{k-1}(A_{n,k,a_1} A_{n,k,a_2}) \\ &= \sum_{\substack{1 \leq j_1, j_2 \leq p; \\ \mathbf{i}^{(l)} \in \mathcal{P}(k-1, a_l-1): l=1,2}} \{c(n, a_1)c(n, a_2)\}^{1/2} \sigma_{j_1, j_2} \prod_{l=1}^2 \prod_{t=1}^{a_l-1} x_{i_t^{(l)}, j_l}. \end{aligned}$$

To prove Lemma  $\text{var}(\sum_{k=1}^n \pi_{n,k}^2) \rightarrow 0$ , it suffices to prove  $\text{var}(\mathbb{T}_{k,a_1,a_2}) = o(n^{-2})$ , where  $\text{var}(\mathbb{T}_{k,a_1,a_2}) = \mathbb{E}(\mathbb{T}_{k,a_1,a_2}^2) - \{\mathbb{E}(\mathbb{T}_{k,a_1,a_2})\}^2$ . We consider without loss of generality that  $k \geq \max\{a_1, a_2\}$ .

When  $\{\mathbf{i}^{(1)}\} \neq \{\mathbf{i}^{(2)}\}$ ,  $\mathbb{E}(\prod_{l=1}^2 \prod_{t=1}^{a_l} x_{i_t^{(l)}, j_t}) = 0$ ; and when  $\{\mathbf{i}^{(1)}\} = \{\mathbf{i}^{(2)}\}$ , it induces  $a_1 = a_2$  and  $\mathbb{E}(\prod_{l=1}^2 \prod_{t=1}^{a_l} x_{i_t^{(l)}, j_t}) = \sigma_{j_1, j_2}^a$  where we write  $a_1 = a_2 = a$ . It follows that when  $a_1 \neq a_2$ ,  $\mathbb{E}(\mathbb{T}_{k,a_1,a_2}) = 0$ ; when  $a_1 = a_2 = a$ ,

$$\mathbb{E}(\mathbb{T}_{k,a_1,a_2}) = \sum_{\substack{1 \leq j_1, j_2 \leq p; \\ \mathbf{i}^{(l)} \in \mathcal{P}(k-1, a_l-1): l=1,2}} \mathbf{1}_{\{\{\mathbf{i}^{(1)}\} = \{\mathbf{i}^{(2)}\}\}} \times \{c(n, a_1)c(n, a_2)\}^{1/2} \sigma_{j_1, j_2}^a.$$

Then

$$\{\mathbb{E}(\mathbb{T}_{k,a_1,a_2})\}^2 = \sum_{\substack{1 \leq j_1, j_2, j_3, j_4 \leq p; \\ \mathbf{i}^{(l)} \in \mathcal{P}(k-1, a_l-1): l=1,2,3,4}} \mathbf{1}_{\left\{ \begin{array}{l} \{\mathbf{i}^{(1)}\} = \{\mathbf{i}^{(2)}\} \\ \{\mathbf{i}^{(3)}\} = \{\mathbf{i}^{(4)}\} \end{array} \right\}} \prod_{l=1}^2 c(n, a_l) \times (\sigma_{j_1, j_2} \sigma_{j_3, j_4})^a.$$

In addition, we obtain

$$\mathbb{E}(\mathbb{T}_{k,a_1,a_2}^2) = \sum_{\substack{1 \leq j_1, j_2, j_3, j_4 \leq p; \\ \mathbf{i}^{(l)} \in \mathcal{P}(k-1, a_l-1): l=1,2,3,4}} \left\{ \prod_{l=1}^2 c(n, a_l) \sigma_{j_{2l-1}, j_{2l}} \right\} \mathbb{E} \left( \prod_{l=1}^4 \prod_{t=1}^{a_l-1} x_{i_t^{(l)}, j_l} \right),$$

where for simplicity of representation, we set  $a_3 = a_1$  and  $a_4 = a_2$ . Define

$$\begin{aligned} G_{k,a_1,a_2,1} = & \sum_{\substack{1 \leq j_1, j_2, j_3, j_4 \leq p; \\ \mathbf{i}^{(l)} \in \mathcal{P}(k-1, a_l-1): l=1,2,3,4}} \mathbf{1}_{\left\{ \begin{array}{l} \{\mathbf{i}^{(1)}\} = \{\mathbf{i}^{(2)}\}, \\ \{\mathbf{i}^{(3)}\} = \{\mathbf{i}^{(4)}\}, \\ \{\mathbf{i}^{(1)}\} \cap \{\mathbf{i}^{(3)}\} = \emptyset \end{array} \right\}} \\ & \times \left\{ \prod_{l=1}^2 c(n, a_l) \sigma_{j_{2l-1}, j_{2l}} \right\} \mathbb{E} \left( \prod_{l=1}^4 \prod_{t=1}^{a_l-1} x_{i_t^{(l)}, j_l} \right). \end{aligned}$$

Since  $|\mathbb{E}(\mathbb{T}_{k,a_1,a_2}^2) - \{\mathbb{E}(\mathbb{T}_{k,a_1,a_2})\}^2| \leq |\mathbb{E}(\mathbb{T}_{k,a_1,a_2}^2) - G_{k,a_1,a_2,1}| + |G_{k,a_1,a_2,1} - \{\mathbb{E}(\mathbb{T}_{k,a_1,a_2})\}^2|$ , we next prove  $\mathbb{E}(\mathbb{T}_{k,a_1,a_2}^2) - G_{k,a_1,a_2,1} = o(n^{-2})$  and  $G_{k,a_1,a_2,1} - \{\mathbb{E}(\mathbb{T}_{k,a_1,a_2})\}^2 = o(n^{-2})$  respectively.

*Step I:*  $\mathbb{E}(\mathbb{T}_{k,a_1,a_2}^2) - G_{k,a_1,a_2,1} = o(n^{-2})$ . When  $\{\mathbf{i}^{(1)}\} = \{\mathbf{i}^{(2)}\}$ ,  $\{\mathbf{i}^{(3)}\} = \{\mathbf{i}^{(4)}\}$ , and  $\{\mathbf{i}^{(1)}\} \cap \{\mathbf{i}^{(3)}\} = \emptyset$ , it implies that  $a_1 = a_2 = a$ ,  $|\cup_{l=1}^4 \{\mathbf{i}^{(l)}\}| \leq a_1 + a_2 - 3$ , and

$$\left( \prod_{l=1}^2 \sigma_{j_{2l-1}, j_{2l}} \right) \times \mathbb{E} \left( \prod_{l=1}^4 \prod_{t=1}^{a_l-1} x_{i_t^{(l)}, j_l} \right) = (\sigma_{j_1, j_2} \sigma_{j_3, j_4})^a.$$

It follows that if  $a_1 \neq a_2$ ,  $\{\mathbb{E}(\mathbb{T}_{k,a_1,a_2})\}^2 - G_{k,a_1,a_2,1} = 0$ ; if  $a_1 = a_2 = a$ ,

$$\begin{aligned} & \left| \{\mathbb{E}(\mathbb{T}_{k,a_1,a_2})\}^2 - G_{k,a_1,a_2,1} \right| \\ & = c(n, a_1) c(n, a_2) O(n^{a_1+a_2-3}) \left| \sum_{1 \leq j_1, j_2, j_3, j_4 \leq p} (\sigma_{j_1, j_2} \sigma_{j_3, j_4})^a \right| = o(n^{-2}) \end{aligned}$$

where we use  $c(n, a) = \Theta(p^{-1}n^{-a})$  and by Condition A.2,

$$(B.5.1) \quad \sum_{1 \leq j_1, j_2, j_3, j_4 \leq p} (\sigma_{j_1, j_2} \sigma_{j_3, j_4})^a = O(p^2).$$

*Step II:*  $G_{k,a_1,a_2,1} - \{\mathbb{E}(\mathbb{T}_{k,a_1,a_2})\}^2 = o(n^{-2})$ . We write  $\mathbb{E}(\mathbb{T}_{k,a_1,a_2}^2) - G_{k,a_1,a_2,1} = G_{k,a_1,a_2,2} + G_{k,a_1,a_2,3}$ , where

$$\begin{aligned} G_{k,a_1,a_2,2} = & \sum_{\substack{1 \leq j_1, j_2, j_3, j_4 \leq p; \\ \mathbf{i}^{(l)} \in \mathcal{P}(k-1, a_l-1): l=1,2,3,4}} \mathbf{1}_{\left\{ \begin{array}{l} \{\mathbf{i}^{(1)}\} = \{\mathbf{i}^{(2)}\}, \\ \{\mathbf{i}^{(3)}\} = \{\mathbf{i}^{(4)}\}, \\ \{\mathbf{i}^{(1)}\} \cap \{\mathbf{i}^{(3)}\} \neq \emptyset \end{array} \right\}} \\ & \times \left\{ \prod_{l=1}^2 c(n, a_l) \sigma_{j_{2l-1}, j_{2l}} \right\} \mathbb{E} \left( \prod_{l=1}^4 \prod_{t=1}^{a_l-1} x_{i_t^{(l)}, j_l} \right), \end{aligned}$$

and

$$G_{k,a_1,a_2,3} = \sum_{\substack{1 \leq j_1, j_2, j_3, j_4 \leq p; \\ \mathbf{i}^{(l)} \in \mathcal{P}(k-1, a_l-1): l=1,2,3,4}} \mathbf{1}_{\left\{ \begin{array}{l} \{\mathbf{i}^{(1)}\} \neq \{\mathbf{i}^{(2)}\} \text{ or } \\ \{\mathbf{i}^{(3)}\} \neq \{\mathbf{i}^{(4)}\} \end{array} \right\}} \times \left\{ \prod_{l=1}^2 c(n, a_l) \sigma_{j_{2l-1}, j_{2l}} \right\} \mathbb{E} \left( \prod_{l=1}^4 \prod_{t=1}^{a_l-1} x_{i_t^{(l)}, j_l} \right).$$

For  $G_{k,a_1,a_2,2}$ , it is a summation over the indexes satisfying  $\{\mathbf{i}^{(1)}\} = \{\mathbf{i}^{(2)}\}$ ,  $\{\mathbf{i}^{(3)}\} = \{\mathbf{i}^{(4)}\}$  and  $\{\mathbf{i}^{(1)}\} \cap \{\mathbf{i}^{(3)}\} \neq \emptyset$ . Thus  $|\cup_{l=1}^4 \{\mathbf{i}^{(l)}\}| \leq a_1 + a_2 - 3$ , and by  $c(n, a) = \Theta(p^{-1}n^{-a})$  and (B.5.1),

$$|G_{k,a_1,a_2,2}| \leq Cp^{-2}n^{-(a_1+a_2)}n^{a_1+a_2-3} \sum_{1 \leq j_1, j_2, j_3, j_4 \leq p} \sigma_{j_1, j_2} \sigma_{j_3, j_4} = o(n^{-2}).$$

For  $G_{k,a_1,a_2,3}$ , it is a summation over the indexes satisfying  $\{\mathbf{i}^{(1)}\} \neq \{\mathbf{i}^{(2)}\}$  or  $\{\mathbf{i}^{(3)}\} \neq \{\mathbf{i}^{(4)}\}$ . We assume without loss of generality that  $\{\mathbf{i}^{(1)}\} \neq \{\mathbf{i}^{(2)}\}$  and there exists an index  $m \in \{\mathbf{i}^{(1)}\}$  but  $m \notin \{\mathbf{i}^{(2)}\}$ . Similarly to Section B.1.5, we know

$$(B.5.2) \quad \left( \prod_{l=1}^2 \sigma_{j_{2l-1}, j_{2l}} \right) \times \mathbb{E} \left( \prod_{l=1}^4 \prod_{t=1}^{a_l-1} x_{i_t^{(l)}, j_l} \right)$$

is nonzero only when  $|\cup_{l=1}^4 \{\mathbf{i}^{(l)}\}| \leq a_1 + a_2 - 2$ , that is, each index appears at least twice among the four sets  $\{\mathbf{i}^{(l)}\}, l = 1, 2, 3, 4$ . Therefore, we know if (B.5.2)  $\neq 0$ ,  $m \in \{\mathbf{i}^{(3)}\} \cup \{\mathbf{i}^{(4)}\}$ . If  $m \in \{\mathbf{i}^{(3)}\}$  but  $m \notin \{\mathbf{i}^{(4)}\}$ , (B.5.2) =  $\sigma_{j_1, j_2} \sigma_{j_3, j_4} \sigma_{j_1, j_3} \mathbb{E}(\text{other terms})$ . Under this case, we define  $\tilde{K}_0 = -(2 + \epsilon)(4 + \gamma) \log p / (\epsilon \log \delta)$ , where  $\gamma$  and  $\epsilon$  are some positive constants and  $\delta$  is from Condition A.2. Then we have

$$(B.5.3) \quad \sum_{1 \leq j_1, j_2, j_3, j_4 \leq p} (B.5.2) \leq C \sum_{1 \leq j_1, j_2, j_3, j_4 \leq p} \sigma_{j_1, j_2} \sigma_{j_3, j_4} \sigma_{j_1, j_3} \\ \leq C \sum_{\substack{|j_1 - j_2| \leq \tilde{K}_0, \\ |j_3 - j_4| \leq \tilde{K}_0, \\ |j_1 - j_3| \leq \tilde{K}_0}} 1 + C \sum_{|j_1 - j_2| \geq \tilde{K}_0} \delta^{|j_1 - j_2| \epsilon / (2 + \epsilon)} \\ = O(p \tilde{K}_0^2) + O(p^4 p^{-(4 + \gamma)}),$$

where in the second inequality, we use the symmetry of  $j$  indexes and also use Lemma B.0.1 similarly as in Section A.9. If  $m \in \{\mathbf{i}^{(4)}\}$  but  $m \notin \{\mathbf{i}^{(3)}\}$ , (B.5.3) also holds similarly. If  $m \in \{\mathbf{i}^{(3)}\}$  and  $m \in \{\mathbf{i}^{(4)}\}$ , (B.5.2) =

$\sigma_{j_1, j_2} \sigma_{j_3, j_4} \mathbb{E}(x_{m, j_1} x_{m, j_3} x_{m, j_4}) \mathbb{E}(\text{other terms})$ . Similarly to (B.5.3), as  $\mathbb{E}(\mathbf{x}) = \mathbf{0}$ , if  $|j_1 - j_3| > \tilde{K}_0$  and  $|j_1 - j_4| > \tilde{K}_0$ , (B.5.2)  $\leq C\delta^{|j_1 - j_2|/\epsilon/(2+\epsilon)}$ . Thus under this case, we also have  $\sum_{1 \leq j_1, j_2, j_3, j_4 \leq p}$  (B.5.2)  $= O(p\tilde{K}_0^2) + O(p^{-\gamma})$ . Recall that (B.5.2)  $\neq 0$  only when  $|\cup_{l=1}^4 \{\mathbf{i}^{(l)}\}| \leq a_1 + a_2 - 2$ . By  $c(n, a) = \Theta(p^{-1}n^{-a})$  and  $\tilde{K}_0 = O(\log p)$ ,

$$\begin{aligned} |G_{k, a_1, a_2, 3}| &\leq Cp^{-2}n^{-(a_1+a_2)}n^{a_1+a_2-2} \sum_{1 \leq j_1, j_2, j_3, j_4 \leq p} |(\text{B.5.2})| \\ &= n^{-2}p^{-2} \left\{ O(p\tilde{K}_0^2) + O(p^{-\gamma}) \right\} = o(n^{-2}). \end{aligned}$$

In summary,

$$\text{var}(\mathbb{T}_{k, a_1, a_2}) \leq |\mathbb{E}(\mathbb{T}_{k, a_1, a_2}^2) - G_{k, a_1, a_2, 1}| + |G_{k, a_1, a_2, 2}| + |G_{k, a_1, a_2, 3}| = o(n^{-2}),$$

and then  $\text{var}(\sum_{k=1}^n \pi_{n, k}^2) \rightarrow 0$  is proved.

*B.5.1.2. Proof of  $\sum_{k=1}^n \mathbb{E}(D_{n, k}^4) \rightarrow 0$ .* Similarly to Section B.1.6,

$$\sum_{k=1}^n \mathbb{E}(D_{n, k}^4) = \sum_{k=1}^n \sum_{1 \leq r_1, r_2, r_3, r_4 \leq m} \prod_{l=1}^4 t_{r_l} \times \mathbb{E}\left(\prod_{l=1}^4 A_{n, k, a_{r_l}}\right).$$

To prove  $\sum_{k=1}^n \mathbb{E}(D_{n, k}^4) \rightarrow 0$ , it suffices to show that for given  $1 \leq k \leq n$  and finite integers  $(a_1, a_2, a_3, a_4)$ , we have  $\mathbb{E}(\prod_{l=1}^4 A_{n, k, a_l}) = o(n^{-1})$ .

In particular,

$$\begin{aligned} \mathbb{E}\left(\prod_{l=1}^4 A_{n, k, a_l}\right) &= \left\{ \prod_{l=1}^4 c(n, a_l) \right\}^{1/2} \sum_{\substack{\mathbf{i}^{(l)} \in \mathcal{P}(k-1, a_l-1), l=1, \dots, 4; \\ 1 \leq j_1, j_2, j_3, j_4 \leq p}} \\ &\quad \mathbb{E}\left(\prod_{l=1}^4 x_{k, j_l}\right) \mathbb{E}\left(\prod_{l=1}^4 \prod_{t=1}^{a_l-1} x_{i_t, j_l}\right). \end{aligned}$$

Similarly to Section B.1.6, we have  $\mathbb{E}(\prod_{l=1}^4 \prod_{t=1}^{a_l-1} x_{i_t, j_l}) \neq 0$  only when  $|\cup_{l=1}^4 \{\mathbf{i}^{(l)}\}| \leq \sum_{l=1}^4 (a_l - 1)/2$ . We will prove that

$$(B.5.4) \quad \sum_{1 \leq j_1, j_2, j_3, j_4 \leq p} \mathbb{E}\left(\prod_{l=1}^4 x_{k, j_l}\right) = O(p^2).$$

Then as  $c(n, a) = \Theta(p^{-1}n^{-a})$ ,

$$\mathbb{E}\left(\prod_{l=1}^4 A_{n, k, a_l}\right) = O(1)p^{-2}n^{-\sum_{l=1}^4 a_l/2}n^{\sum_{l=1}^4 (a_l-1)/2}p^2 = o(n^{-1}).$$

To finish the proof, it remains to show (B.5.4). When  $|\{j_1, j_2, j_3, j_4\}| \leq 2$ ,

$$\sum_{1 \leq j_1, j_2, j_3, j_4 \leq p} \mathbb{E} \left( \prod_{l=1}^4 x_{k, j_l} \right) \mathbf{1}_{\{|\{j_1, j_2, j_3, j_4\}| \leq 2\}} = O(p^2).$$

When  $|\{j_1, j_2, j_3, j_4\}| \geq 3$ , we assume without loss of generality that  $j_1 \leq j_2 \leq j_3 \leq j_4$ . For  $\tilde{K}_0$  defined in Section B.5.1.1, if  $|j_1 - j_2| > \tilde{K}_0$  or  $|j_3 - j_4| > \tilde{K}_0$ ,  $|\mathbb{E}(\prod_{l=1}^4 x_{k, j_l})| \leq C\delta^{|j_1 - j_2| \epsilon / (2 + \epsilon)} = O(p^{-(4 + \gamma)})$ . If  $|j_1 - j_2| \leq \tilde{K}_0$  and  $|j_3 - j_4| \leq \tilde{K}_0$ , but  $|j_2 - j_3| > K_0$ , by Lemma B.0.1,

$$\left| \mathbb{E} \left( \prod_{l=1}^4 x_{k, j_l} \right) \right| \leq \sigma_{j_1, j_2} \sigma_{j_3, j_4} + C\delta^{|j_1 - j_2| \epsilon / (2 + \epsilon)} = \sigma_{j_1, j_2} \sigma_{j_3, j_4} + O(p^{-(4 + \gamma)}).$$

Therefore

$$\begin{aligned} & \sum_{1 \leq j_1, j_2, j_3, j_4 \leq p} \mathbb{E} \left( \prod_{l=1}^4 x_{k, j_l} \right) \mathbf{1}_{\{|\{j_1, j_2, j_3, j_4\}| \geq 3\}} \\ &= O(p\tilde{K}_0^3) + O(p^4 p^{-(4 + \gamma)}) + \sum_{1 \leq j_1, j_2, j_3, j_4 \leq p} \sigma_{j_1, j_2} \sigma_{j_3, j_4} = O(p^2), \end{aligned}$$

where in the last equation, we use Condition A.2 (2). In summary, (B.5.4) is proved and the proof is finished.

## B.6. Lemmas for the proof of Theorem 4.3.

B.6.1. *Proof of Lemma A.10.1 (on Page 20, Section A.10).* Under  $H_0 : \boldsymbol{\mu} = \boldsymbol{\nu}$ , we assume  $\boldsymbol{\mu} = \boldsymbol{\nu} = \mathbf{0}$  without loss of generality by Proposition A.1. To derive  $\text{var}\{\mathcal{U}(a)\}$ , we write  $\mathcal{U}(a) = \sum_{j=1}^p \mathcal{U}^{(j)}(a)$ , where we define  $G(a, c) = (-1)^{a-c} \binom{a}{c} (P_c^{n_x})^{-1} (P_{a-c}^{n_y})^{-1}$ , and

$$(B.6.1) \quad \mathcal{U}^{(j)}(a) = \sum_{c=0}^a G(a, c) \sum_{\substack{\mathbf{k} \in \mathcal{P}(n_x, c), \\ \mathbf{s} \in \mathcal{P}(n_y, a-c)}} \prod_{t=1}^c x_{k_t, j} \prod_{m=1}^{a-c} y_{s_m, j}.$$

Since  $\mathbb{E}\{\mathcal{U}(a)\} = 0$  under  $H_0$ ,

$$(B.6.2) \quad \text{var}\{\mathcal{U}(a)\} = \mathbb{E}\{\mathcal{U}^2(a)\} = \sum_{1 \leq j_1, j_2 \leq p} \mathbb{E}\{\mathcal{U}^{(j_1)}(a) \times \mathcal{U}^{(j_2)}(a)\}.$$

Note that for given  $1 \leq j_1, j_2 \leq p$ ,

$$\mathbb{E}\{\mathcal{U}^{(j_1)}(a) \mathcal{U}^{(j_2)}(a)\} = \sum_{\substack{0 \leq c \leq a, \\ \mathbf{k} \in \mathcal{P}(n_x, c), \\ \mathbf{s} \in \mathcal{P}(n_y, a-c)}} \sum_{\substack{0 \leq \tilde{c} \leq a, \\ \tilde{\mathbf{k}} \in \mathcal{P}(n_x, \tilde{c}), \\ \tilde{\mathbf{s}} \in \mathcal{P}(n_y, a-\tilde{c})}} G(a, c) G(a, \tilde{c}) Q(\mathbf{k}, \mathbf{s}, \tilde{\mathbf{k}}, \tilde{\mathbf{s}}, \mathbf{j}).$$

where we define

$$Q(\mathbf{k}, \mathbf{s}, \tilde{\mathbf{k}}, \tilde{\mathbf{s}}, \mathbf{j}) = \mathbb{E} \left( \prod_{t=1}^c x_{k_t, j_1} \prod_{\tilde{t}=1}^{\tilde{c}} x_{\tilde{k}_{\tilde{t}}, j_2} \right) \mathbb{E} \left( \prod_{m=1}^{a-c} y_{s_m, j_1} \prod_{\tilde{m}=1}^{a-\tilde{c}} y_{\tilde{s}_{\tilde{m}}, j_2} \right).$$

Since we assume the  $n = n_x + n_y$  copies are independent from each other and  $\boldsymbol{\mu} = \boldsymbol{\nu} = \mathbf{0}$ , then  $Q(\mathbf{k}, \mathbf{s}, \tilde{\mathbf{k}}, \tilde{\mathbf{s}}) = 0$  if  $\{\mathbf{k}\} \neq \{\tilde{\mathbf{k}}\}$  or  $\{\mathbf{s}\} \neq \{\tilde{\mathbf{s}}\}$ . If  $\{\mathbf{k}\} = \{\tilde{\mathbf{k}}\}$  and  $\{\mathbf{s}\} = \{\tilde{\mathbf{s}}\}$ , it induces  $c = \tilde{c}$  and  $Q(\mathbf{k}, \mathbf{s}, \tilde{\mathbf{k}}, \tilde{\mathbf{s}}, \mathbf{j}) = \sigma_{x, j_1, j_2}^c \sigma_{y, j_1, j_2}^{a-c}$ . It follows that

$$\begin{aligned} \text{(B.6.3)} \quad \mathbb{E}\{\mathcal{U}^{(j_1)}(a)\mathcal{U}^{(j_2)}(a)\} &= \sum_{c=0}^a G^2(c) P_c^{n_x} P_{a-c}^{n_y} c! (a-c)! \sigma_{x, j_1, j_2}^c \sigma_{y, j_1, j_2}^{a-c} \\ &= a! \sum_{c=0}^a \binom{a}{c} (P_c^{n_x})^{-1} (P_{a-c}^{n_y})^{-1} \sigma_{x, j_1, j_2}^c \sigma_{y, j_1, j_2}^{a-c} \\ &\simeq a! \left( \frac{\sigma_{x, j_1, j_2}}{n_x} + \frac{\sigma_{y, j_1, j_2}}{n_y} \right)^a. \end{aligned}$$

Combining (B.6.2) and (B.6.3), we obtain  $\text{var}\{\mathcal{U}(a)\}$ . By Condition A.4,  $\text{var}\{\mathcal{U}(a)\} = \Theta(pn^{-a})$ .

**B.6.2. Proof of Lemma A.10.2 (on Page 20, Section A.10).** Since under  $H_0$ ,  $\mathbb{E}\{\mathcal{U}(a)\} = \mathbb{E}\{\mathcal{U}(b)\} = 0$ , we have  $\text{cov}\{\mathcal{U}(a), \mathcal{U}(b)\} = \mathbb{E}\{\mathcal{U}(a) \times \mathcal{U}(b)\}$ . Following (B.6.1),

$$\text{(B.6.4)} \quad \mathbb{E}\{\mathcal{U}(a) \times \mathcal{U}(b)\} = \sum_{1 \leq j_1, j_2 \leq p} \mathbb{E}\{\mathcal{U}^{(j_1)}(a) \times \mathcal{U}^{(j_2)}(b)\},$$

where

$$\begin{aligned} \mathbb{E}\{\mathcal{U}^{(j_1)}(a) \times \mathcal{U}^{(j_2)}(b)\} &= \sum_{\substack{0 \leq c \leq a, \\ \mathbf{k} \in \mathcal{P}(n_x, c), \\ \mathbf{s} \in \mathcal{P}(n_y, a-c)}} \sum_{\substack{0 \leq \tilde{c} \leq b, \\ \tilde{\mathbf{k}} \in \mathcal{P}(n_x, \tilde{c}), \\ \tilde{\mathbf{s}} \in \mathcal{P}(n_y, b-\tilde{c})}} G(a, c) G(b, \tilde{c}) \\ &\quad \times \mathbb{E} \left( \prod_{t=1}^c x_{k_t, j_1} \prod_{\tilde{t}=1}^{\tilde{c}} x_{\tilde{k}_{\tilde{t}}, j_2} \right) \mathbb{E} \left( \prod_{m=1}^{a-c} y_{s_m, j_1} \prod_{\tilde{m}=1}^{b-\tilde{c}} y_{\tilde{s}_{\tilde{m}}, j_2} \right). \end{aligned}$$

As  $a \neq b$ ,  $\{\mathbf{k}\} \neq \{\tilde{\mathbf{k}}\}$  and  $\{\mathbf{s}\} \neq \{\tilde{\mathbf{s}}\}$  always hold. Then as  $\boldsymbol{\mu} = \boldsymbol{\nu} = \mathbf{0}$ ,  $\mathbb{E}(\prod_{t=1}^c x_{k_t, j_1} \prod_{\tilde{t}=1}^{\tilde{c}} x_{\tilde{k}_{\tilde{t}}, j_2}) = 0$  and  $\mathbb{E}(\prod_{m=1}^{a-c} y_{s_m, j_1} \prod_{\tilde{m}=1}^{b-\tilde{c}} y_{\tilde{s}_{\tilde{m}}, j_2}) = 0$ , similarly to Section B.1.2. It follows that (B.6.4) = 0 and the lemma is proved.



**B.6.3. Proof of Lemma A.10.3 (on Page 21, Section A.10).** By the Cramér-Wold Theorem, to prove the asymptotic joint normality of the U-statistics, it suffices to prove that any of their fixed converges to normal. For illustration, we first prove the asymptotic normality for each  $\mathcal{U}(a)$  of finite  $a$ . The similar arguments can be applied to the linear combination of finite U-statistics and then the joint normality is obtained.

Recall  $\mathcal{U}(a) = \sum_{j=1}^p \mathcal{U}^{(j)}(a)$  from (B.6.1). To derive the limiting distribution of  $\mathcal{U}(a)$ , we use Bernstein's block method in [17, page 338]; see also [7, 28]. Specifically, we partition the sequence,  $\sigma^{-1}(a) \times \mathcal{U}^{(j)}(a)$ ,  $j = 1, \dots, p$ , into  $r$  blocks, where each block contains  $b$  variables such that  $rb \leq p < (r+1)b$ . For each  $1 \leq k \leq r$ , we partition the  $k$ th block into two sub-blocks with a larger one  $A_{k,1}$  and a smaller one  $A_{k,2}$ . Suppose each  $A_{k,1}$  has  $b_1$  variables and each  $A_{k,2}$  has  $b_2 = b - b_1$  variables. We require  $r \rightarrow \infty$ ,  $b_1 \rightarrow \infty$ ,  $b_2 \rightarrow \infty$ ,  $rb_1/p \rightarrow 1$  and  $rb_2/p \rightarrow 0$  as  $p \rightarrow \infty$ . We write

$$A_{k,1}(a) = \sum_{i=1}^{b_1} \mathcal{U}^{(k-1)b+i}(a), \quad A_{k,2}(a) = \sum_{i=1}^{b_2} \mathcal{U}^{(k-1)b+b_1+i}(a),$$

and further define  $\mathcal{U}_1 = \sigma^{-1}(a) \sum_{k=1}^r A_{k,1}(a)$ ,  $\mathcal{U}_2 = \sigma^{-1}(a) \sum_{k=1}^r A_{k,2}(a)$ , and  $\mathcal{U}_3 = \sigma^{-1}(a) \sum_{j=rb+1}^p \mathcal{U}^{(j)}(a)$ . Thus we have the decomposition:  $\sigma^{-1}(a) \times \mathcal{U}(a) = \mathcal{U}_1 + \mathcal{U}_2 + \mathcal{U}_3$ .

The Bernstein's block method makes  $A_{k,1}$  "almost" independent, thus the study of  $\mathcal{U}_1$  may be related to the cases of sums of independent random variables. In addition, since  $b_2$  is small compared with  $b_1$ , we will show that the sums  $\mathcal{U}_2$  and  $\mathcal{U}_3$  will be small compared with the total sum of variables in the sequence, i.e.,  $\sigma^{-1}(a) \times \mathcal{U}(a)$ . In particular, we first show

$$\sigma^{-1}(a) \times \mathcal{U}(a) = \mathcal{U}_1 + o_p(1),$$

where  $o_p(1)$  represents that the remaining term converges to 0 in probability. Since  $E(\mathcal{U}_2) = E(\mathcal{U}_3) = 0$ , it suffices to prove that  $\text{var}(\mathcal{U}_2) = \text{var}(\mathcal{U}_3) = o(1)$ .

For  $\mathcal{U}_2$ , note that  $\mathcal{U}_2 = \sigma^{-1}(a) \sum_{k=1}^r A_{k,2}(a)$ . Then

$$(B.6.5) \quad \text{var}(\mathcal{U}_2) \leq \sigma^{-2}(a) \sum_{\substack{1 \leq k_1, k_2 \leq r; \\ 1 \leq i_1, i_2 \leq b_2}} \left| \text{cov} \left\{ \mathcal{U}^{((k_1-1)b+b_1+i_1)}(a), \mathcal{U}^{((k_2-1)b+b_1+i_2)}(a) \right\} \right|.$$

Recall  $\alpha_x(s)$  and  $\alpha_y(s)$  in Condition A.4. Define  $\alpha(s) = \alpha_x(s) + \alpha_y(s)$ , then  $\alpha(s) \leq C\delta^s$ , where  $\delta = \max\{\delta_x, \delta_y\} \in (0, 1)$ . By the  $\alpha$ -mixing inequality in Lemma B.0.1,

$$\left| \text{cov} \left\{ n^{a/2} \mathcal{U}^{(i)}(a), n^{a/2} \mathcal{U}^{(j)}(a) \right\} \right| \leq 8 \{ \alpha(|i-j|) \}^{\frac{\epsilon}{2+\epsilon}} \max_{1 \leq j \leq p} \left[ E \left| n^{a/2} \mathcal{U}^{(j)}(a) \right|^{2+\epsilon} \right]^{\frac{2}{2+\epsilon}}.$$

We take  $\epsilon = 2$ , and by Lemma B.6.1 (on Page 132, Section B.6.4), we have  $\max_{1 \leq j \leq p} \mathbb{E}\{n^{a/2}\mathcal{U}^{(j)}(a)\}^{2+\epsilon} < \infty$ . It follows that

$$\begin{aligned}
\text{(B.6.6)} \quad & \left| \text{cov} \left\{ \mathcal{U}^{((k_1-1)b+b_1+i_1)}(a), \mathcal{U}^{((k_2-1)b+b_1+i_2)}(a) \right\} \right| \\
&= n^{-a} \left| \text{cov} \left\{ n^{a/2}\mathcal{U}^{((k_1-1)b+b_1+i_1)}(a), n^{a/2}\mathcal{U}^{((k_2-1)b+b_1+i_2)}(a) \right\} \right| \\
&\leq Cn^{-a} \alpha \left\{ |(k_1-1)b+b_1+i_1 - ((k_2-1)b+b_1+i_2)| \right\}^{\frac{2}{4}} \\
&\leq Cn^{-a} \delta^{|k_1b+i_1-k_2b-i_2|/2}.
\end{aligned}$$

By (B.6.5), (B.6.6) and  $\sigma^2(a) = \Theta(pn^{-a})$  from Lemma A.10.1,

$$\begin{aligned}
& \text{var}(\mathcal{U}_2) \\
&\leq \sigma^{-2}(a) \sum_{\substack{1 \leq k_1, k_2 \leq r; \\ 1 \leq i_1, i_2 \leq b_2}} \left| \text{cov} \left\{ \mathcal{U}^{((k_1-1)b+b_1+i_1)}(a), \mathcal{U}^{((k_2-1)b+b_1+i_2)}(a) \right\} \right| \\
&\leq \sigma^{-2}(a) \sum_{\substack{1 \leq k_1, k_2 \leq r; \\ 1 \leq i_1, i_2 \leq b_2}} n^{-a} C \delta^{|k_1b+i_1-k_2b-i_2|/2} \\
&= O(1)p^{-1}n^a r b_2 n^{-a} = O(1) r b_2 p^{-1},
\end{aligned}$$

which converges to 0 by our construction, i.e.,  $r b_2/p \rightarrow 0$ . This shows that  $\text{var}(\mathcal{U}_2) = o(1)$ . Next we examine  $\mathcal{U}_3 = \sigma^{-1}(a) \sum_{j=rb+1}^p \mathcal{U}^{(j)}(a)$ . Similarly, by Lemmas B.0.1 and B.6.1, and  $\epsilon = 2$ ,

$$\begin{aligned}
\text{var}(\mathcal{U}_3) &= \sigma^{-2}(a) n^{-a} \sum_{i=rb+1}^p \sum_{j=rb+1}^p \text{cov} \left\{ n^{a/2}\mathcal{U}^{(i)}(a), n^{a/2}\mathcal{U}^{(j)}(a) \right\} \\
&\leq O(1)p^{-1}n^a n^{-a} \sum_{i=rb+1}^p \sum_{j=rb+1}^p C \alpha (|i-j|)^{\frac{\epsilon}{2+\epsilon}} \\
&\leq O(1)p^{-1} \sum_{i=rb+1}^p \sum_{j=rb+1}^p \delta^{|i-j|/2} \\
&\leq O(1)p^{-1}(p-rb-1) \\
&\leq O(1)p^{-1}b.
\end{aligned}$$

Since  $b/p \rightarrow 0$ ,  $\text{var}(\mathcal{U}_3) = o(1)$ .

Given  $\text{var}(\mathcal{U}_2) = o(1)$  and  $\text{var}(\mathcal{U}_3) = o(1)$  above, next we focus on  $\mathcal{U}_1$ . By the  $\alpha$ -mixing assumption in Condition A.4, and following the similar arguments in [17, page 338], we have for properly chosen  $r$  and  $b_2$ ,

$$\left| \mathbb{E} \{ \exp(it\mathcal{U}_1) \} - \prod_{k=1}^r \mathbb{E} [ \exp \{ it\sigma^{-1}(a)A_{k,1}(a) \} ] \right| \leq 16r\alpha(b_2) \rightarrow 0.$$

This suggests there exist independent random variables  $\{\xi_k : k = 1, \dots, r\}$  such that  $\xi_k$  and  $A_{k,1}(a)$  are identically distributed and  $\mathcal{U}_1$  has the same asymptotic distribution as  $\sigma^{-1}(a) \sum_{k=1}^r \xi_k$ . To prove the asymptotic normality of  $\sigma^{-1}(a)\mathcal{U}_1$ , now it remains to show that central limit theorem holds for  $\sigma^{-1}(a) \sum_{k=1}^r \xi_k$ . Then we check the Lyapunov condition, i.e., check that the moments of  $\xi_k$  satisfy

$$(B.6.7) \quad s_r^{-4} \sum_{k=1}^r \mathbb{E} \{ \sigma^{-1}(a) |\xi_k| \}^4 \rightarrow 0,$$

where we define  $s_r^2 = \sum_{k=1}^r \text{var} \{ \sigma^{-1}(a) \xi_k \}$ . By Lemma B.6.1, for even  $\epsilon > 0$ ,

$$(B.6.8) \quad M_{4+\epsilon} := \max_{1 \leq j \leq p} \left\{ \left\| n^{a/2} \{ \mathcal{U}^{(j)}(a) \} \right\|_{4+\epsilon} \right\} < \infty.$$

Then by the moment bounds in [20, Theorem 1], and the  $\alpha$ -mixing assumption in Condition A.4, for  $g(2, \epsilon) = \epsilon/(4 + \epsilon)$ ,

$$\mathbb{E} \left( \left[ \sum_{j=1}^{b_1} n^{a/2} \{ \mathcal{U}^{(j)}(a) \} \right]^4 \right) \leq C b_1^2 \left\{ C + M_{4+\epsilon}^4 \sum_{j=1}^{b_1} j^{2-1} \alpha(j)^{g(2, \epsilon)} \right\}$$

As  $\delta \in (0, 1)$  and  $0 < g(2, \epsilon) < 1$ ,

$$\sum_{j=1}^{\infty} j \alpha(j)^{g(2, \epsilon)} \leq C \sum_{j=1}^{\infty} j \times (\delta^{g(2, \epsilon)})^j < \infty.$$

It follows that

$$\begin{aligned} \mathbb{E} \{ \sigma^{-1}(a) A_{1,1}(a) \}^4 &= \sigma^{-4}(a) n^{-2a} \mathbb{E} \left[ \sum_{j=1}^{b_1} n^{a/2} \{ \mathcal{U}^{(j)}(a) \} \right]^4 \\ &\leq O(1) p^{-2} n^{2a} n^{-2a} \times b_1^2 \left\{ C + M_{4+\epsilon}^4 \sum_{j=1}^{b_1} j^{2-1} \alpha(j)^{g(2, \epsilon)} \right\} \\ &= O(1) p^{-2} \times b_1^2. \end{aligned}$$

Similarly, for other  $k > 1$ ,  $\mathbb{E} \{ \sigma^{-1}(a) A_{k,1}(a) \}^4$  have the same bound. Thus,

$$(B.6.9) \quad \sum_{k=1}^r \sigma^{-4}(a) \mathbb{E} |\xi_k|^4 = O(1) r p^{-2} b_1^2.$$

In addition,

$$\begin{aligned}
\text{var}\{\sigma^{-1}(a)\xi_k\} &= \sigma^{-2}(a)\text{var}\left\{\sum_{i=1}^{b_1}\mathcal{U}^{((k-1)b+i)}(a)\right\} \\
&= \sigma^{-2}(a)\sum_{1\leq i_1, i_2\leq b_1}\text{cov}\left\{\mathcal{U}^{((k-1)b+i_1)}(a), \mathcal{U}^{((k-1)b+i_2)}(a)\right\} \\
&= \sigma^{-2}(a)\sum_{1\leq i_1, i_2\leq b_1} \quad (\text{B.6.3}).
\end{aligned}$$

By Condition A.4 and  $rb_1/p \rightarrow 1$ , we have

$$\begin{aligned}
(\text{B.6.10}) \quad s_r^4 &= \left[\sum_{j=1}^r \text{var}\{\xi_j/\sigma(a)\}\right]^2 \\
&= \Theta(1)p^{-2}n^{2a}(r \times b_1n^{-a})^2 = \Theta(1)p^{-2}r^2b_1^2.
\end{aligned}$$

Combine (B.6.9) and (B.6.10), (B.6.7) is proved as  $r \rightarrow \infty$ .

In summary, for any finite integer  $a$ , we prove the asymptotic normality of  $\mathcal{U}(a)/\sigma(a)$ . For any linear combination of U-statistics  $Z_n := \sum_{r=1}^m t_r \mathcal{U}(a_r)/\sigma(a_r)$ , we can similarly decompose  $Z_n$  into three parts and apply the analysis above. The similar conclusion holds for finite  $m$  and the asymptotic joint normality is obtained by the Cramér-Wold Theorem.

#### B.6.4. Proof of Lemma B.6.1 (on Page 132, Section B.6.3).

LEMMA B.6.1. For  $\forall$  finite even  $\omega > 0$  any  $\forall$  finite integer  $a > 0$ ,

$$\max_{1\leq j\leq p} \mathbb{E}\left\{n^{a/2}\mathcal{U}^{(j)}(a)\right\}^\omega < \infty.$$

PROOF. Recall the definition of  $\mathcal{U}^{(j)}(a)$  in (B.6.1). For positive even  $\omega$ ,

$$\begin{aligned}
(\text{B.6.11}) \quad &\mathbb{E}[\{\mathcal{U}^{(j)}(a)\}^\omega] \\
&= \sum_{l=1}^{\omega} \sum_{\substack{0\leq c_l\leq a, \\ \mathbf{k}^{(l)}\in\mathcal{P}(n_x, c_l), \\ \mathbf{s}^{(l)}\in\mathcal{P}(n_y, a-c_l)}} G(c_l)\mathbb{E}\left(\prod_{l=1}^{\omega}\prod_{t_l=1}^{c_l} x_{k_{t_l}^{(l)}, j}\right)\mathbb{E}\left(\prod_{l=1}^{\omega}\prod_{m_l=1}^{a-c_l} y_{s_{m_l}^{(l)}, j}\right).
\end{aligned}$$

Define the index tuple  $(\mathbf{k}^{(1)}, \dots, \mathbf{k}^{(\omega)}) = (k_1^{(1)}, \dots, k_{c_1}^{(1)}, \dots, k_1^{(\omega)}, \dots, k_{c_\omega}^{(\omega)})$ . When  $|\{(\mathbf{k}^{(1)}, \dots, \mathbf{k}^{(\omega)})\}| > \sum_{l=1}^{\omega} c_l/2$ , it means that one of the index appears only once. Suppose index  $i \in \{(\mathbf{k}^{(1)}, \dots, \mathbf{k}^{(\omega)})\}$  only appears once,

then under  $H_0$ ,

$$(B.6.12) \quad \mathbb{E} \left( \prod_{l=1}^{\omega} \prod_{t_l=1}^{c_l} x_{k_{t_l}^{(l)}, j} \right) = \mathbb{E}(x_{i,j}) \times \mathbb{E}(\text{other terms}) = 0.$$

Thus (B.6.12)  $\neq 0$  only when  $|\{(\mathbf{k}^{(1)}, \dots, \mathbf{k}^{(\omega)})\}| \leq \sum_{l=1}^{\omega} c_l/2$ . By the boundedness of moments in Condition A.4,

$$\max_{1 \leq j \leq p} \sum_{0 \leq c_l \leq a, \mathbf{k}^{(l)} \in \mathcal{P}(n_x, c_l)} \mathbb{E} \left( \prod_{l=1}^{\omega} \prod_{t_l=1}^{c_l} x_{k_{t_l}^{(l)}, j} \right) = O \left( n_x^{\sum_{l=1}^{\omega} c_l/2} \right).$$

Similarly, we have

$$\max_{1 \leq j \leq p} \sum_{0 \leq c_l \leq a, \mathbf{s}^{(l)} \in \mathcal{P}(n_y, a-c_l)} \mathbb{E} \left( \prod_{l=1}^{\omega} \prod_{m_l=1}^{a-c_l} y_{s_{m_l}^{(l)}, j} \right) = O \left( n_y^{\sum_{l=1}^{\omega} (a-c_l)/2} \right).$$

As  $G(a, c) = \Theta(n_x^{-c} n_y^{-(a-c)})$ , by (B.6.11),  $\max_{1 \leq j \leq p} \mathbb{E}[\{n^{a/2} \mathcal{U}^{(j)}(a)\}^\omega] < \infty$ .  $\square$

## B.7. Lemmas for the proof of Theorem 4.4.

B.7.1. *Proof of Lemma A.11.1 (on Page 21, Section A.11).* Recall  $\mathcal{U}^{(j)}(a)$  defined in (B.6.1). Similarly to  $\tilde{\mathcal{U}}_c(a)$ , we define  $\tilde{\mathcal{U}}_c^{(j)}(a)$  as the sequence of random variables on the conditional probability measure  $\tilde{P}$ , given the event  $n_x n_y \mathcal{U}(\infty)/(n_x + n_y) - \tau_p \leq u$  such that

$$\begin{aligned} & \tilde{P} \left\{ \tilde{\mathcal{U}}_c^{(j)}(a) \leq u_j : 1 \leq j \leq p \right\} \\ &= P \left\{ \mathcal{U}^{(j)}(a) \leq u_j : 1 \leq j \leq p \mid \frac{n_x n_y}{n_x + n_y} \mathcal{U}(\infty) \leq \tau_p + u \right\}. \end{aligned}$$

Then  $\sigma^{-1}(a) \tilde{\mathcal{U}}_c(a) = \sigma^{-1}(a) \sum_{j=1}^p \tilde{\mathcal{U}}_c^{(j)}(a)$ , and we prove the asymptotic normality of  $\sigma^{-1}(a) \tilde{\mathcal{U}}_c(a)$  similarly to Section B.6.3. In particular, we partition the sequence  $\{\sigma^{-1}(a) \times \tilde{\mathcal{U}}_c^{(j)}(a) : 1 \leq j \leq p\}$  into  $r$  blocks, where each block contains  $b$  variables such that  $rb \leq p < (r+1)b$ . For each  $1 \leq k \leq r$ , we further partition the  $k$ th block into two sub-blocks such that a larger one  $\tilde{A}_{k,1}$  contains the first  $b_1$  variables and a smaller one  $\tilde{A}_{k,2}$  contains the last  $b_2 = b - b_1$  variables. Similarly, for  $1 \leq k \leq r$ , we write

$$\tilde{A}_{k,1}(a) = \sum_{i=1}^{b_1} \tilde{\mathcal{U}}_c^{(k-1)b+i}(a), \quad \tilde{A}_{k,2}(a) = \sum_{i=1}^{b_2} \tilde{\mathcal{U}}_c^{(k-1)b+b_1+i}(a).$$

Correspondingly, define  $\tilde{\mathcal{U}}_1 = \sigma^{-1}(a) \sum_{k=1}^r \tilde{A}_{k,1}(a)$ ,  $\tilde{\mathcal{U}}_2 = \sigma^{-1}(a) \sum_{k=1}^r \tilde{A}_{k,2}(a)$  and  $\tilde{\mathcal{U}}_3 = \sigma^{-1}(a) \sum_{j=rb+1}^p \tilde{\mathcal{U}}_c^{(j)}(a)$ . Then we have the decomposition:  $\sigma^{-1}(a) \times \tilde{\mathcal{U}}_c(a) = \tilde{\mathcal{U}}_1 + \tilde{\mathcal{U}}_2 + \tilde{\mathcal{U}}_3$ . To show that  $\sigma^{-1}(a) \times \tilde{\mathcal{U}}_c(a)$  satisfies the central limit theorem, we first show that  $\tilde{\mathbb{E}}(\tilde{\mathcal{U}}_2^2) = o(1)$  and  $\tilde{\mathbb{E}}(\tilde{\mathcal{U}}_3^2) = o(1)$ .

$$\begin{aligned} \tilde{\mathbb{E}}(\tilde{\mathcal{U}}_2^2) &= \sigma^{-2}(a) \tilde{\mathbb{E}}\left\{\left(\sum_{k=1}^r \tilde{A}_{k,2}(a)\right)^2\right\} \\ &\leq \sigma^{-2}(a) \left(\sum_{1 \leq k_1, k_2 \leq r} \left[\tilde{\mathbb{E}}\left\{\tilde{A}_{k_1,2}^2(a)\right\}\right]^{1/2} \left[\tilde{\mathbb{E}}\left\{\tilde{A}_{k_2,2}^2(a)\right\}\right]^{1/2}\right) \\ &\leq \sigma^{-2}(a) \left[P\left\{\frac{n_x n_y}{n_x + n_y} \mathcal{U}(\infty) < \tau_p\right\}\right]^{-1} \\ &\quad \times \left(\sum_{1 \leq k_1, k_2 \leq r} \left[\mathbb{E}\left\{A_{k_1,2}^2(a)\right\}\right]^{1/2} \left[\mathbb{E}\left\{A_{k_2,2}^2(a)\right\}\right]^{1/2}\right), \end{aligned}$$

where in the last inequality we use the fact that

$$\begin{aligned} \tilde{\mathbb{E}}\left\{\tilde{A}_{k,2}^2(a)\right\} &= \frac{\mathbb{E}\left\{A_{k,2}^2(a) \mathbf{1}_{\{n_x n_y \mathcal{U}(\infty)/(n_x + n_y) < \tau_p + u\}}\right\}}{P\{n_x n_y \mathcal{U}(\infty)/(n_x + n_y) < \tau_p + u\}} \\ &\leq \frac{\mathbb{E}\left\{A_{k,2}^2(a)\right\}}{P\{n_x n_y \mathcal{U}(\infty)/(n_x + n_y) < \tau_p + u\}}. \end{aligned}$$

The upper bound above converges to 0 under the  $\alpha$ -mixing condition by choosing proper convergence rate  $b_2$ ; see Eq. (18.4.8) of [17]. Similarly, we can also show  $\tilde{\mathbb{E}}(\tilde{\mathcal{U}}_3^2) = o(1)$ . It remains to examine the  $\tilde{\mathcal{U}}_1$ . Define  $\alpha(s)$  as the mixing coefficient of  $\{(x_{1,j}, \dots, x_{n_x,j}, y_{1,j}, \dots, y_{n_y,j} : j = 1, \dots, p)\}$  and define  $\tilde{\alpha}(s)$  as the corresponding mixing coefficient on the conditional probability measure. Following a similar argument to that in [16, Lemma 2.2], we have

$$\tilde{\alpha}(d) \leq 4 \frac{\max_{1 \leq h \leq p-d} P\{U_{h,d}^0(\infty) > \tau_p + u\} + \alpha(d)}{[P\{n_x n_y \mathcal{U}(\infty)/(n_x + n_y) < \tau_p + u\}]^3},$$

where  $U_{h,d}^0(\infty) = \max_{h \leq j \leq h+d} U^{(j)}(\infty)$ ,  $U^{(j)}(\infty) = \sigma_{j,j}^{-1} \times (\bar{x}_j - \bar{y}_j)^2 \times n_x n_y / (n_x + n_y)$ , and recall  $\tau_p = 2 \log p - \log \log p$ . Since  $x_{i,j}$  and  $y_{i,j}$  are sub-gaussian random variables by Condition A.4 [26, Proposition 2.5.2], we know  $\sigma_{j,j}^{-1/2} \times (\bar{x}_j - \bar{y}_j) \times \sqrt{n_x n_y} / \sqrt{n_x + n_y}$  is a sub-gaussian variable with variance 1. Therefore,  $\max_{1 \leq h \leq p-d} P\{U_{h,d}^0(\infty) > \tau_p + u\} \leq d \max_{1 \leq j \leq p} P\{U^{(j)}(\infty) > \tau_p + u\} \leq Cd \exp\{-(\tau_p + u)/2\} \leq Cdp^{-1} \sqrt{\log p}$ . Then similarly to [17, page

338], we have

$$\begin{aligned} & \left| \tilde{\mathbb{E}} \left\{ \exp(it\tilde{\mathcal{U}}_1) \right\} - \prod_{k=1}^r \tilde{\mathbb{E}} \left[ \exp \left\{ it\sigma^{-1}(a)\tilde{A}_{k,1}(a) \right\} \right] \right| \\ & \leq 16r\tilde{\alpha}(b_2) \\ & \leq 64r \frac{\max_{1 \leq h \leq p-b_2} P\{U_{h,b_2}^0(\infty) > \tau_p + u\} + \alpha(b_2)}{[P\{n_x n_y \mathcal{U}(\infty)/(n_x + n_y) < \tau_p + u\}]^3}, \end{aligned}$$

which converges to 0 for properly chosen  $r$  and  $b_2$  such that  $rb_2\sqrt{\log p}/p \rightarrow 0$ . Thus there exist independent  $\{\tilde{\xi}_k : k = 1, \dots, r\}$  such that  $\tilde{\xi}_k$  and  $\tilde{A}_{k,1}(a)$  are identically distributed on probability measure  $\tilde{P}$ . Similarly to [16, Lemma 2.4, Lemma 2.5], we have  $\tilde{\mathbb{E}}\{\sigma^{-1}(a)\sum_{k=1}^r \tilde{\xi}_k\} \rightarrow 0$  and  $\tilde{\mathbb{E}}[\{\sigma^{-1}(a)\sum_{k=1}^r \tilde{\xi}_k\}^2] \rightarrow 1$ . To show the asymptotic normality on the conditional probability measure, it remains to check the Lyapunov condition that

$$\sum_{k=1}^r \tilde{\mathbb{E}} \left\{ \sigma^{-1}(a)|\tilde{\xi}_k| \right\}^4 \leq \sigma^{-4}(a) \frac{\sum_{k=1}^r \mathbb{E}(\xi_k^4)}{P\{n_x n_y \mathcal{U}(\infty)/(n_x + n_y) < \tau_p + u\}} \rightarrow 0,$$

where  $\xi_k$  are define same as in Appendix Section B.6.3, and the convergence result follows from (B.6.7). This implies the asymptotic normality of conditional distribution given  $\{n_x n_y \mathcal{U}(\infty)/(n_x + n_y) < \tau_p + u\}$ . Thus we obtain the asymptotic independence between  $\mathcal{U}(a)/\sigma(a)$  and  $\mathcal{U}(\infty)$ .

### B.8. Lemmas for the proof of Theorem 4.5.

B.8.1. *Proof of Lemma A.12.1.* Recall the definitions in (A.12.1).  $T_{a,2}$  is the summation over  $j$  indexes in the set  $\{k_0, \dots, p\}$  such that  $\mu_j = \nu_j = 0$ . Then  $\mathbb{E}(T_{a,2}) = 0$ . Following the argument in Section B.6.1, we obtain

$$\text{var}(T_{a,2}) \simeq \sum_{k_0+1 \leq j_1, j_2 \leq p} a! \left( \frac{\sigma_{x,j_1,j_2}}{n_x} + \frac{\sigma_{y,j_1,j_2}}{n_y} \right)^a.$$

Let  $\mathcal{V}_{a,j_1,j_2} = \{\sigma_{x,j_1,j_2}/\gamma + \sigma_{y,j_1,j_2}/(1-\gamma)\}^a$ . By the mixing assumption in Condition A.4 and Lemma B.0.1, we know there exist some constants  $C$  and  $\tilde{\delta}$  such that  $|\mathcal{V}_{a,j_1,j_2}| \leq C\tilde{\delta}^{|j_1-j_2|}$ . Note that

$$\begin{aligned} & \left| \sum_{1 \leq j_1, j_2 \leq p} \mathcal{V}_{a,j_1,j_2} - \sum_{k_0+1 \leq j_1, j_2 \leq p} \mathcal{V}_{a,j_1,j_2} \right| \\ & = \left| \left( \sum_{1 \leq j_1, j_2 \leq k_0} + \sum_{1 \leq j_1 \leq k_0, k_0+1 \leq j_2 \leq p} + \sum_{1 \leq j_2 \leq k_0, k_0+1 \leq j_1 \leq p} \right) \mathcal{V}_{a,j_1,j_2} \right| \\ & \leq C \left( \sum_{1 \leq j_1, j_2 \leq k_0} + \sum_{1 \leq j_1 \leq k_0, k_0+1 \leq j_2 \leq p} + \sum_{1 \leq j_2 \leq k_0, k_0+1 \leq j_1 \leq p} \right) \tilde{\delta}^{|j_1-j_2|} = O(k_0). \end{aligned}$$

Since  $k_0 = o(p)$  and Condition A.4 assumes that  $\sum_{1 \leq j_1, j_2 \leq p} \mathcal{V}_{a, j_1, j_2} = \Theta(p)$ , then  $\sum_{k_0+1 \leq j_1, j_2 \leq p} \mathcal{V}_{a, j_1, j_2} = \Theta(p)$ . It follows that  $\text{var}(T_{a,2}) = \Theta(p^2 n^{-a})$ .

It remains to prove  $\text{var}(T_{a,1}) = o(pn^{-a})$ . Note that  $\text{var}(T_{a,1}) = \text{E}(T_{a,1}^2) - \{\text{E}(T_{a,1})\}^2$ , and  $\text{E}(T_{a,1}) = k_0 \rho^a$ . Following the definition in (A.12.1),

$$\text{E}(T_{a,1}^2) = \sum_{1 \leq j_1, j_2 \leq k_0} \sum_{\substack{0 \leq c \leq a, \\ \mathbf{k} \in \mathcal{P}(n_x, c), \\ \mathbf{s} \in \mathcal{P}(n_y, a-c)}} \sum_{\substack{0 \leq \tilde{c} \leq a, \\ \tilde{\mathbf{k}} \in \mathcal{P}(n_x, \tilde{c}), \\ \tilde{\mathbf{s}} \in \mathcal{P}(n_y, a-\tilde{c})}} G(a, c) G(a, \tilde{c}) Q(\mathbf{k}, \mathbf{s}, \tilde{\mathbf{k}}, \tilde{\mathbf{s}}, \mathbf{j}),$$

where similarly to Section B.6.1,

$$Q(\mathbf{k}, \mathbf{s}, \tilde{\mathbf{k}}, \tilde{\mathbf{s}}, \mathbf{j}) = \text{E} \left( \prod_{t=1}^c x_{k_t, j_1} \prod_{\tilde{t}=1}^{\tilde{c}} x_{\tilde{k}_{\tilde{t}}, j_2} \right) \text{E} \left( \prod_{m=1}^{a-c} y_{s_m, j_1} \prod_{\tilde{m}=1}^{a-\tilde{c}} y_{\tilde{s}_{\tilde{m}}, j_2} \right).$$

Since  $\text{E}(\mathbf{y}) = \boldsymbol{\nu} = \mathbf{0}$ , if  $\{\mathbf{s}\} \neq \{\tilde{\mathbf{s}}\}$ ,  $Q(\mathbf{k}, \mathbf{s}, \tilde{\mathbf{k}}, \tilde{\mathbf{s}}, \mathbf{j}) = 0$ . If  $\{\mathbf{s}\} = \{\tilde{\mathbf{s}}\}$ , it induces  $c = \tilde{c}$ . When  $\{\mathbf{s}\} = \{\tilde{\mathbf{s}}\}$ , let  $b = |\{\mathbf{k}\} \cap \{\tilde{\mathbf{k}}\}|$ , then  $0 \leq b \leq c$ ,

$$\text{E}\{Q(\mathbf{k}, \mathbf{s}, \tilde{\mathbf{k}}, \tilde{\mathbf{s}}, \mathbf{j})\} = \mu_{j_1}^{c-b} \mu_{j_2}^{c-b} \varphi_{j_1, j_2}^b \sigma_{j_1, j_2}^{a-c} = \rho^{2(c-b)} \varphi_{j_1, j_2}^b \sigma_{j_1, j_2}^{a-c},$$

and

$$\text{E}(T_{a,1}^2) = \sum_{1 \leq j_1, j_2 \leq k_0} \sum_{\substack{0 \leq c \leq a, \\ \mathbf{k}, \tilde{\mathbf{k}} \in \mathcal{P}(n_x, c); \\ \mathbf{s}, \tilde{\mathbf{s}} \in \mathcal{P}(n_y, a-c)}} G^2(a, c) \times \rho^{2(c-b)} \varphi_{j_1, j_2}^b \sigma_{j_1, j_2}^{a-c} \times \mathbf{1}_{\{\{\mathbf{s}\} = \{\tilde{\mathbf{s}}\}\}}.$$

We next decompose  $\text{E}(T_{1,a}^2) = G_{t,1,a,1} + G_{t,1,a,2} + G_{t,1,a,3}$ , where

$$G_{t,1,a,1} = \sum_{1 \leq j_1, j_2 \leq k_0} \sum_{\substack{0 \leq c \leq a, \\ \mathbf{k}, \tilde{\mathbf{k}} \in \mathcal{P}(n_x, c); \\ \mathbf{s}, \tilde{\mathbf{s}} \in \mathcal{P}(n_y, a-c)}} G^2(a, c) \rho^{2(c-b)} \varphi_{j_1, j_2}^b \sigma_{j_1, j_2}^{a-c} \mathbf{1}_{\{\{\mathbf{s}\} = \{\tilde{\mathbf{s}}\}, c=a, b=0\}},$$

$$G_{t,1,a,2} = \sum_{1 \leq j_1, j_2 \leq k_0} \sum_{\substack{0 \leq c \leq a, \\ \mathbf{k}, \tilde{\mathbf{k}} \in \mathcal{P}(n_x, c); \\ \mathbf{s}, \tilde{\mathbf{s}} \in \mathcal{P}(n_y, a-c)}} G^2(a, c) \rho^{2(c-b)} \varphi_{j_1, j_2}^b \sigma_{j_1, j_2}^{a-c} \mathbf{1}_{\{\{\mathbf{s}\} = \{\tilde{\mathbf{s}}\}, c \leq a-1, b=0\}},$$

and

$$G_{t,1,a,3} = \sum_{1 \leq j_1, j_2 \leq k_0} \sum_{\substack{0 \leq c \leq a, \\ \mathbf{k}, \tilde{\mathbf{k}} \in \mathcal{P}(n_x, c); \\ \mathbf{s}, \tilde{\mathbf{s}} \in \mathcal{P}(n_y, a-c)}} G^2(a, c) \rho^{2(c-b)} \varphi_{j_1, j_2}^b \sigma_{j_1, j_2}^{a-c} \mathbf{1}_{\{\{\mathbf{s}\} = \{\tilde{\mathbf{s}}\}, 1 \leq b \leq c\}}.$$



Note that  $|\text{var}(T_{a,1})| \leq |G_{t,1,a,1} - \{\mathbb{E}(T_{a,1})\}^2| + |G_{t,1,a,2}| + |G_{t,1,a,3}|$ . To prove  $\text{var}(T_{a,1}) = o(pn^{-a})$ , we will next show  $|G_{t,1,a,1} - \{\mathbb{E}(T_{a,1})\}^2|$ ,  $|G_{t,1,a,2}|$  and  $|G_{t,1,a,3}|$  are  $o(pn^{-a})$  respectively.

First, as  $\sum_{\mathbf{k}, \tilde{\mathbf{k}} \in \mathcal{P}(n_x, a); \mathbf{s}, \tilde{\mathbf{s}} \in \mathcal{P}(n_y, a-c)} \mathbf{1}_{\{\{\mathbf{s}\} = \{\tilde{\mathbf{s}}\}, c=a, b=0\}} = P_{2a}^{n_x}$  and  $G(a, a) = (P_a^{n_x})^{-1}$ ,

$$G_{t,1,a,1} = \sum_{1 \leq j_1, j_2 \leq k_0} \sum_{\substack{0 \leq c \leq a, \\ \mathbf{k}, \tilde{\mathbf{k}} \in \mathcal{P}(n_x, c); \\ \mathbf{s}, \tilde{\mathbf{s}} \in \mathcal{P}(n_y, a-c)}} G^2(a, c) \rho^{2a} \mathbf{1}_{\{\{\mathbf{s}\} = \{\tilde{\mathbf{s}}\}, c=a, b=0\}} = \frac{P_{2a}^{n_x}}{(P_a^{n_x})^2} k_0^2 \rho^{2a}.$$

Then  $|G_{t,1,a,1} - \{\mathbb{E}(T_{a,1})\}^2| = o(1)k_0^2 n^{-2a} n^{2a} \rho^{2a} = o(pn^{-a})$ , where we use  $\mathbb{E}(T_{a,1}) = k_0 \rho^a$ . In addition, as  $\sum_{\mathbf{k}, \tilde{\mathbf{k}} \in \mathcal{P}(n_x, c); \mathbf{s}, \tilde{\mathbf{s}} \in \mathcal{P}(n_y, a-c)} \mathbf{1}_{\{\{\mathbf{s}\} = \{\tilde{\mathbf{s}}\}, c \leq a-1, b=0\}} = O(n^{2c+a-c})$  and  $G(a, c) = \Theta(n^{-a})$ , we have

$$|G_{t,1,a,2}| \leq C \sum_{1 \leq j_1, j_2 \leq k_0} \sum_{c=0}^{a-1} n^{-(a-c)} \rho^{2c} \sigma_{j_1, j_2}^{a-c}.$$

Since  $\sum_{1 \leq j_1, j_2 \leq k_0} \sigma_{j_1, j_2} = O(k_0)$  by Condition A.4 and Lemma B.0.1, we further know  $|G_{t,1,a,2}| = \sum_{c=0}^{a-1} O(k_0 \rho^{2c} n^{-(a-c)})$ . As  $\rho = O(k_0^{-1/a} p^{1/(2a)} n^{-1/2})$  and  $k_0 = o(p)$ , we obtain  $|G_{t,1,a,2}| = o(pn^{-a})$ . Moreover, as  $G(a, c) = \Theta(n^{-a})$ ,  $\varphi_{j_1, j_2} = \rho^2 + \sigma_{j_1, j_2}$ , and  $\sum_{\mathbf{k}, \tilde{\mathbf{k}} \in \mathcal{P}(n_x, c); \mathbf{s}, \tilde{\mathbf{s}} \in \mathcal{P}(n_y, a-c)} \mathbf{1}_{\{\{\mathbf{s}\} = \{\tilde{\mathbf{s}}\}, b \geq 1\}} = O(n^{2c-b+a-c})$ ,

$$|G_{t,1,a,3}| \leq C \sum_{\substack{0 \leq c \leq a, \\ 1 \leq b \leq c}} \sum_{1 \leq j_1, j_2 \leq k_0} n^{-(b+a-c)} \rho^{2(c-b)} (\sigma_{j_1, j_2} + \rho^2)_{j_1, j_2}^b \sigma_{j_1, j_2}^{a-c}.$$

For given  $c$  and  $b$ , the maximum order of  $\sum_{1 \leq j_1, j_2 \leq k_0} n^{-(b+a-c)} \rho^{2(c-b)} (\sigma_{j_1, j_2} + \rho^2)_{j_1, j_2}^b \sigma_{j_1, j_2}^{a-c}$  is bounded by the following two quantities:

$$(B.8.1) \quad \sum_{1 \leq j_1, j_2 \leq k_0} C n^{-(b+a-c)} \rho^{2c} \sigma_{j_1, j_2}^{a-c},$$

$$(B.8.2) \quad \sum_{1 \leq j_1, j_2 \leq k_0} C n^{-(b+a-c)} \sigma_{j_1, j_2}^{b+a-c} \rho^{2(c-b)}.$$

For (B.8.1), when  $c = a$ , (B.8.1) =  $O(k_0^2 n^{-b} \rho^{2a}) = o(pn^{-a})$ . When  $c \leq a - 1$ , since  $\sum_{1 \leq j_1, j_2 \leq k_0} \sigma_{j_1, j_2} = O(k_0)$  by Condition A.4 and Lemma B.0.1, then (B.8.1) =  $O(k_0 n^{-(b+a-c)} \rho^{2c}) = o(pn^{-a})$ . For (B.8.2), as  $b \geq 1$ ,  $b + a - c \geq 1$ . Then similarly by Condition A.4 and Lemma B.0.1, (B.8.2) =  $O(k_0 n^{-(b+a-c)} \rho^{2(c-b)}) = o(pn^{-a})$ .

In summary, we obtain  $\text{var}(T_{a,1}) = o(pn^{-a}) = o(1)\text{var}(T_{a,2})$ . Then

$$\text{var}\{\mathcal{U}(a)\} \simeq \text{var}(T_{a,2}) \simeq \sum_{k_0+1 \leq j_1, j_2 \leq p} a! \left( \frac{\sigma_{x,j_1,j_2}}{n_x} + \frac{\sigma_{y,j_1,j_2}}{n_y} \right)^a.$$

By Markov's inequality,  $\{T_{a,1} - \mathbb{E}(T_{a,1})\}/\sigma(a) \xrightarrow{P} 0$ .

**B.8.2. Proof of Lemma A.12.2.** Note that

$$\{\sigma(a)\sigma(b)\}^{-1} \text{cov}\{\mathcal{U}(a), \mathcal{U}(b)\} = \{\sigma(a)\sigma(b)\}^{-1} \times \sum_{1 \leq l_1, l_2 \leq 2} \text{cov}(T_{a,l_1}, T_{b,l_2}).$$

Lemma A.12.1 suggests that  $\text{var}(T_{a,1}) = o(1)\sigma^2(a)$ . By the Cauchy-Schwarz inequality,  $\{\sigma(a)\sigma(b)\}^{-1} \text{cov}\{\mathcal{U}(a), \mathcal{U}(b)\} = \{\sigma(a)\sigma(b)\}^{-1} \text{cov}(T_{a,2}, T_{b,2}) + o(1)$ . To finish the proof, it suffices to show  $\text{cov}(T_{a,2}, T_{b,2}) = 0$ . Note that  $T_{a,2}$  and  $T_{b,2}$  are summation over  $j$  indexes in the set  $\{k_0, \dots, p\}$  such that  $\mu_j = \nu_j = 0$ . Then the proof in Section B.6.2 applies similarly and we have  $\text{cov}(T_{a,2}, T_{b,2}) = 0$ .

## B.9. Lemmas for the proof of Theorem 4.6.

**B.9.1. Proof of Lemma A.13.1 (on Page 25, Section A.13).** In the following, we will first derive the form of  $\text{var}\{\tilde{\mathcal{U}}(a)\}$  and then prove that  $\text{var}\{\tilde{\mathcal{U}}(a)\} = o(1)\text{var}\{\tilde{\mathcal{U}}^*(a)\}$ .

As we assume  $\mathbb{E}(\mathbf{x}) = \mathbb{E}(\mathbf{y}) = \mathbf{0}$ , then  $\text{cov}(x_{1,j_1}, x_{1,j_2}) = \mathbb{E}(x_{1,j_1}x_{1,j_2})$  and  $\text{cov}(y_{1,j_1}, y_{1,j_2}) = \mathbb{E}(y_{1,j_1}y_{1,j_2})$ . It follows that  $\mathbb{E}\{\mathcal{U}(a)\} = 0$  and  $\text{var}\{\mathcal{U}(a)\} = \mathbb{E}\{\mathcal{U}^2(a)\}$ . By definition,

$$\tilde{\mathcal{U}}(a) = (P_a^{n_x} P_a^{n_y})^{-1} \sum_{1 \leq j_1, j_2 \leq p} \sum_{\substack{\mathbf{i} \in \mathcal{P}(n_x, a); \\ \mathbf{w} \in \mathcal{P}(n_y, a)}} \mathbb{D}_{\mathbf{x}, \mathbf{y}}(\mathbf{i}, \mathbf{w}, j_1, j_2),$$

where we define  $\mathbb{D}_{\mathbf{x}, \mathbf{y}}(\mathbf{i}, \mathbf{w}, j_1, j_2) = \prod_{t=1}^a (x_{i_t, j_1} x_{i_t, j_2} - y_{w_t, j_1} y_{w_t, j_2})$ . Then

$$\text{var}\{\tilde{\mathcal{U}}(a)\} = \frac{1}{(P_a^{n_x} P_a^{n_y})^2} \sum_{\substack{1 \leq j_1, j_2, j_3, j_4 \leq p; \\ \mathbf{i}, \tilde{\mathbf{i}} \in \mathcal{P}(n_x, a); \\ \mathbf{w}, \tilde{\mathbf{w}} \in \mathcal{P}(n_y, a)}} \mathbb{E}\left\{ \mathbb{D}_{\mathbf{x}, \mathbf{y}}(\mathbf{i}, \mathbf{w}, j_1, j_2) \mathbb{D}_{\mathbf{x}, \mathbf{y}}(\tilde{\mathbf{i}}, \tilde{\mathbf{w}}, j_3, j_4) \right\}.$$

Under  $H_0$ ,  $\Sigma_x = \Sigma_y = \Sigma = (\sigma_{j_1, j_2})_{p \times p}$ , then  $\mathbb{E}(x_{1,j_1}x_{1,j_2} - \sigma_{j_1, j_2}) = 0$  and  $\mathbb{E}(y_{1,j_1}y_{1,j_2} - \sigma_{j_1, j_2}) = 0$ . If  $|\{\mathbf{i}\} \cap \{\tilde{\mathbf{i}}\}| + |\{\mathbf{w}\} \cap \{\tilde{\mathbf{w}}\}| < a$ , it means that the common indexes between  $(\mathbf{i}, \mathbf{w})$  and  $(\tilde{\mathbf{i}}, \tilde{\mathbf{w}})$  is smaller than  $a$ , then we know  $\mathbb{E}\{\mathbb{D}_{\mathbf{x}, \mathbf{y}}(\mathbf{i}, \mathbf{w}, j_1, j_2) \mathbb{D}_{\mathbf{x}, \mathbf{y}}(\tilde{\mathbf{i}}, \tilde{\mathbf{w}}, j_3, j_4)\} = 0$ . If  $|\{\mathbf{i}\} \cap \{\tilde{\mathbf{i}}\}| + |\{\mathbf{w}\} \cap \{\tilde{\mathbf{w}}\}| \geq$

$a$ , we know  $\mathbb{E}\{\mathbb{D}_{\mathbf{x},\mathbf{y}}(\mathbf{i}, \mathbf{w}, j_1, j_2)\mathbb{D}_{\mathbf{x},\mathbf{y}}(\tilde{\mathbf{i}}, \tilde{\mathbf{w}}, j_3, j_4)\}$  is a linear combination of  $(\mathbf{X}_{j_1, j_2, j_3, j_4})^m (\mathbf{Y}_{j_1, j_2, j_3, j_4})^{a-m}$ , where  $a - |\{\mathbf{w}\} \cap \{\tilde{\mathbf{w}}\}| \leq m \leq |\{\mathbf{i}\} \cap \{\tilde{\mathbf{i}}\}|$  and

$$\begin{aligned}\mathbf{X}_{j_1, j_2, j_3, j_4} &= \mathbb{E}\{(x_{1, j_1} x_{1, j_2} - \sigma_{j_1, j_2})(x_{1, j_3} x_{1, j_4} - \sigma_{j_3, j_4})\}, \\ \mathbf{Y}_{j_1, j_2, j_3, j_4} &= \mathbb{E}\{(y_{1, j_1} y_{1, j_2} - \sigma_{j_1, j_2})(y_{1, j_3} y_{1, j_4} - \sigma_{j_3, j_4})\}.\end{aligned}$$

And if  $|\{\mathbf{i}\} \cap \{\tilde{\mathbf{i}}\}| + |\{\mathbf{w}\} \cap \{\tilde{\mathbf{w}}\}| = t_0$ ,

$$\sum_{\substack{\mathbf{i}, \tilde{\mathbf{i}} \in \mathcal{P}(n_x, a); \\ \mathbf{w}, \tilde{\mathbf{w}} \in \mathcal{P}(n_y, a)}} \mathbf{1}_{\{|\{\mathbf{i}\} \cap \{\tilde{\mathbf{i}}\}| + |\{\mathbf{w}\} \cap \{\tilde{\mathbf{w}}\}| = t_0\}} = O(n^{4a-t_0}),$$

which achieves the largest order at  $t_0 = a$  when  $t_0 \geq a$ . Therefore,

$$\begin{aligned}\text{var}\{\tilde{\mathcal{U}}(a)\} &\simeq \frac{1}{(P_a^{n_x} P_a^{n_y})^2} \sum_{\substack{1 \leq j_1, j_2, j_3, j_4 \leq p; \\ \mathbf{i}, \tilde{\mathbf{i}} \in \mathcal{P}(n_x, a); \\ \mathbf{w}, \tilde{\mathbf{w}} \in \mathcal{P}(n_y, a)}} \mathbf{1}_{\{|\{\mathbf{i}\} \cap \{\tilde{\mathbf{i}}\}| + |\{\mathbf{w}\} \cap \{\tilde{\mathbf{w}}\}| = a\}} \\ &\quad \times \mathbb{E}\left\{\mathbb{D}_{\mathbf{x},\mathbf{y}}(\mathbf{i}, \mathbf{w}, j_1, j_2)\mathbb{D}_{\mathbf{x},\mathbf{y}}(\tilde{\mathbf{i}}, \tilde{\mathbf{w}}, j_3, j_4)\right\}.\end{aligned}$$

It follows that

$$\begin{aligned}\text{(B.9.1)} \quad \text{var}\{\tilde{\mathcal{U}}(a)\} &\simeq \sum_{1 \leq j_1, j_2, j_3, j_4 \leq p} \sum_{m=0}^a \frac{P_{2a-m}^{n_x} P_{a+m}^{n_y}}{(P_a^{n_x} P_a^{n_y})^2} \binom{a}{m}^2 \binom{a-m}{a-m}^2 \\ &\quad \times m!(a-m)! (\mathbf{X}_{j_1, j_2, j_3, j_4})^m (\mathbf{Y}_{j_1, j_2, j_3, j_4})^{a-m},\end{aligned}$$

and then (B.9.1)  $\simeq \sum_{1 \leq j_1, j_2, j_3, j_4 \leq p} a! (\mathbf{X}_{j_1, j_2, j_3, j_4}/n_x + \mathbf{Y}_{j_1, j_2, j_3, j_4}/n_y)^a$ .

We next prove  $\text{var}\{\tilde{\mathcal{U}}(a)\} = o(1)\text{var}\{\tilde{\mathcal{U}}^*(a)\}$  under Conditions A.5 and A.6 in the following Sections B.9.1.1 and B.9.1.2 respectively.

*B.9.1.1. Under Condition A.5.* To prove  $\text{var}\{\tilde{\mathcal{U}}(a)\} = o(1)\text{var}\{\tilde{\mathcal{U}}^*(a)\}$  under Condition A.5, we will first show  $\text{var}\{\tilde{\mathcal{U}}(a)\} = \Theta(p^2 n^{-a})$ . Note that  $P_{2a-m}^{n_x} P_{a+m}^{n_y} / (P_a^{n_x} P_a^{n_y})^2 \simeq C n^a$ . By (B.9.1), it remains to show that for any  $m \in \{0, 1, \dots, a\}$ ,

$$\text{(B.9.2)} \quad \sum_{1 \leq j_1, j_2, j_3, j_4 \leq p} (\mathbf{X}_{j_1, j_2, j_3, j_4})^m (\mathbf{Y}_{j_1, j_2, j_3, j_4})^{a-m} = \Theta(p^2).$$

We next prove (B.9.2) by discussing different cases of  $\{j_1, j_2, j_3, j_4\}$ , and using  $K_0 = -(2 + \epsilon)(8 + 2\mu)(\log p) / (\epsilon \log \delta)$  similarly to (B.1.46), where  $\epsilon$  and  $\mu$  are positive constants and  $\delta = \max\{\delta_x, \delta_y\}$  from Condition A.5.

**Case 1:** If  $|j_1 - j_2| \leq K_0$  and  $|j_3 - j_4| \leq K_0$ , we define a distance  $\kappa_d = \min\{|j_1 - j_3|, |j_1 - j_4|, |j_2 - j_3|, |j_2 - j_4|\}$ , and discuss when  $\kappa_d > K_0$  and  $\kappa_d \leq K_0$  respectively. For the simplicity of notation, define two indicator functions  $I_1 = \mathbf{1}_{\{|j_1 - j_2| \leq K_0, |j_3 - j_4| \leq K_0, \kappa_d > K_0\}}$  and  $I_2 = \mathbf{1}_{\{|j_1 - j_2| \leq K_0, |j_3 - j_4| \leq K_0, \kappa_d \leq K_0\}}$ . By definition, we have  $\mathbf{X}_{j_1, j_2, j_3, j_4} = \text{cov}(x_{1, j_1} x_{1, j_2}, x_{1, j_3} x_{1, j_4})$  and  $\mathbf{Y}_{j_1, j_2, j_3, j_4} = \text{cov}(y_{1, j_1} y_{1, j_2}, y_{1, j_3} y_{1, j_4})$ . When  $\kappa_d > K_0$ , we know  $\mathbf{X}_{j_1, j_2, j_3, j_4} \leq C\delta^{\frac{K_0\epsilon}{2+\epsilon}}$  by Condition A.5 (2) and (3) and Lemma B.0.1. It follows that

$$(B.9.3) \quad \left| \sum_{1 \leq j_1, j_2, j_3, j_4 \leq p} (\mathbf{X}_{j_1, j_2, j_3, j_4})^m (\mathbf{Y}_{j_1, j_2, j_3, j_4})^{a-m} \times I_1 \right| \\ \leq Cp^4 \delta^{\frac{K_0\epsilon}{2+\epsilon}} = O(1)p^4 \times p^{-(8+2\mu)} = o(1).$$

In addition, note that  $\sum_{1 \leq j_1, j_2, j_3, j_4 \leq p} I_2 = O(pK_0^3) = O(p \log^3 p)$ . By Condition A.5 (2), we know

$$\left| \sum_{1 \leq j_1, j_2, j_3, j_4 \leq p} (\mathbf{X}_{j_1, j_2, j_3, j_4})^m (\mathbf{Y}_{j_1, j_2, j_3, j_4})^{a-m} \times I_2 \right| = O(p \log^3 p).$$

**Case 2:** If  $|j_1 - j_2| > K_0$  or  $|j_3 - j_4| > K_0$ , by Lemma B.0.1, we know that  $|\sigma_{j_1, j_2} \sigma_{j_3, j_4}| \leq C\delta^{\frac{K_0\epsilon}{2+\epsilon}}$ . We consider  $|j_1 - j_2| > K_0$  without loss of generality and discuss the following cases (i)–(iv).

(i) When  $|j_2 - j_3| > K_0/2$  and  $|j_2 - j_4| > K_0/2$ ,

$$|\mathbf{X}_{j_1, j_2, j_3, j_4}| = |\text{cov}(x_{1, j_1} x_{1, j_3} x_{1, j_4}, x_{1, j_2}) - \sigma_{j_1, j_2} \sigma_{j_3, j_4}| \leq C\delta^{\frac{K_0\epsilon}{2(2+\epsilon)}}.$$

(ii) When  $|j_2 - j_3| \leq K_0/2$  and  $|j_2 - j_4| \leq K_0/2$ , we know that  $|j_1 - j_3| \geq |j_1 - j_2| - |j_2 - j_3| > K_0/2$  and  $|j_1 - j_4| \geq |j_1 - j_2| - |j_2 - j_4| > K_0/2$ . Then

$$(B.9.4) \quad |\mathbf{X}_{j_1, j_2, j_3, j_4}| = |\text{cov}(x_{1, j_1}, x_{1, j_2} x_{1, j_3} x_{1, j_4}) - \sigma_{j_1, j_2} \sigma_{j_3, j_4}| \leq C\delta^{\frac{K_0\epsilon}{2(2+\epsilon)}}.$$

(iii) When  $|j_2 - j_3| \leq K_0/2$  and  $|j_2 - j_4| > K_0/2$ , as we know  $|j_1 - j_2| > K_0$ , then  $|j_1 - j_3| > K_0/2$ . We next discuss three sub-cases.

(iiia) If  $|j_1 - j_4| > K_0/2$ , we know (B.9.4) also holds.

For easy presentation, let  $I_3$  be an indicator function when  $\{j_1, j_2, j_3, j_4\}$  satisfies the sub-cases (i), (ii) and (iiia) above. Then similarly to (B.9.3),

$$\left| \sum_{1 \leq j_1, j_2, j_3, j_4 \leq p} (\mathbf{X}_{j_1, j_2, j_3, j_4})^m (\mathbf{Y}_{j_1, j_2, j_3, j_4})^{a-m} \times I_3 \right| = o(1).$$

(iiib) If  $|j_1 - j_4| \leq K_0/2$ , and  $|j_3 - j_4| \leq K_0/2$ , we know under this case  $|j_2 - j_3|, |j_1 - j_4|, |j_3 - j_4| \leq K_0$ . Let  $I_4 = \mathbf{1}_{\{|j_2-j_3|, |j_1-j_4|, |j_3-j_4| \leq K_0\}}$ . We have  $\sum_{1 \leq j_1, j_2, j_3, j_4 \leq p} I_4 = O(pK_0^3)$ . By Condition A.5 (2), we know

$$\left| \sum_{1 \leq j_1, j_2, j_3, j_4 \leq p} (\mathbf{X}_{j_1, j_2, j_3, j_4})^m (\mathbf{Y}_{j_1, j_2, j_3, j_4})^{a-m} \times I_4 \right| = O(p \log^3 p).$$

(iiic) If  $|j_1 - j_4| \leq K_0/2$ , and  $|j_3 - j_4| > K_0/2$ , we know

$$\mathbf{X}_{j_1, j_2, j_3, j_4} \geq \mathbf{E}(x_{1, j_1} x_{1, j_4}) \mathbf{E}(x_{1, j_2} x_{1, j_3}) - C \delta^{\frac{K_0 \epsilon}{2(2+\epsilon)}}.$$

Let  $I_5$  be an indicator function of the sub-case (iiic) above. Then

$$\begin{aligned} & \left| \sum_{1 \leq j_1, j_2, j_3, j_4 \leq p} (\mathbf{X}_{j_1, j_2, j_3, j_4})^m (\mathbf{Y}_{j_1, j_2, j_3, j_4})^{a-m} \times I_5 \right| \\ &= \left| \sum_{1 \leq j_1, j_2, j_3, j_4 \leq p} (\sigma_{j_1, j_4} \sigma_{j_2, j_3})^a \times I_5 \right| + O(p^4 p^{-(4+\mu)}) \\ &= \left| \sum_{|j_1-j_4| \leq K_0/2, |j_2-j_3| \leq K_0/2} (\sigma_{j_1, j_4} \sigma_{j_2, j_3})^a \right| + o(1) \\ &= \left| \sum_{1 \leq j_1, j_2, j_3, j_4 \leq p} (\sigma_{j_1, j_4} \sigma_{j_2, j_3})^a - \sum_{|j_1-j_4| > K_0 \text{ or } |j_2-j_3| > K_0} (\sigma_{j_1, j_4} \sigma_{j_2, j_3})^a \right| + o(1) \\ &= \Theta(p^2). \end{aligned}$$

where the last equation uses Conditions A.5 (3) and (4) and Lemma B.0.1.

(iv) When  $|j_2 - j_3| > K_0/2$  and  $|j_2 - j_4| \leq K_0/2$ , this is symmetric to the sub-case (iii) discussed above. Define an indicator function  $I_6 = \mathbf{1}_{\{|j_2-j_3| > K_0/2, |j_2-j_4| \leq K_0/2\}}$ . We then have

$$\left| \sum_{1 \leq j_1, j_2, j_3, j_4 \leq p} (\mathbf{X}_{j_1, j_2, j_3, j_4})^m (\mathbf{Y}_{j_1, j_2, j_3, j_4})^{a-m} \times I_6 \right| = \Theta(p^2).$$

In summary, (B.9.2) is proved and thus  $\text{var}\{\tilde{\mathcal{U}}(a)\} = \Theta(p^2 n^{-a})$  is obtained. To prove  $\text{var}\{\tilde{\mathcal{U}}(a)\} = o(1) \text{var}\{\tilde{\mathcal{U}}^*(a)\}$ , it remains to show that  $\text{var}\{\tilde{\mathcal{U}}^*(a)\} = o(p^2 n^{-a})$ .

We write  $\mathcal{U}(a) = \sum_{c=0}^a \sum_{b_1=0}^c \sum_{b_2=0}^{a-c} C_{a,c,b_1,b_2} T_{b_1,b_2,c}$ , where we define

$C_{a,c,b_1,b_2} = (-1)^{c-b_1+b_2} a! / \{b_1! b_2! (c-b_1)! (a-c-b_2)!\}$ , and

$$(B.9.5) \quad T_{b_1,b_2,c} = \sum_{1 \leq j_1, j_2 \leq p} \sum_{\substack{\mathbf{i} \in \mathcal{P}(n_x, 2c-b_1); \\ \mathbf{w} \in \mathcal{P}(n_y, 2(a-c)-b_2)}} (P_{2c-b_1}^{n_x} P_{2(a-c)-b_2}^{n_y})^{-1} \\ \times \prod_{k=1}^{b_1} (x_{i_k, j_1} x_{i_k, j_2} - \sigma_{j_1, j_2}) \prod_{k=b_1+1}^c x_{i_k, j_1} \prod_{k=c+1}^{2c-b_1} x_{i_k, j_2} \\ \times \prod_{m=1}^{b_2} (y_{w_m, j_1} y_{w_m, j_2} - \sigma_{j_1, j_2}) \prod_{l=b_2+1}^{a-c} y_{w_l, j_1} \prod_{q=a-c+1}^{2(a-c)-b_2} y_{w_q, j_2}.$$

Then  $\tilde{\mathcal{U}}(a) = \sum_{c=0}^a (-1)^{a-c} T_{c, a-c, c}$  and  $\tilde{\mathcal{U}}^*(a) = \sum_{c=0}^a \sum_{b_1=0}^c \sum_{b_2=0}^{a-c} C_{a,c,b_1,b_2} \times T_{b_1,b_2,c} \mathbf{1}_{b_1+b_2 \leq a-1}$ . Note that  $\text{var}\{\tilde{\mathcal{U}}^*(a)\} \leq C \max_{b_1, b_2, c; b_1+b_2 \leq a-1} \{\text{var}(T_{b_1,b_2,c})\}$ , where  $C$  is some constant. When  $a$  is finite, to prove  $\text{var}\{\tilde{\mathcal{U}}^*(a)\} = o(p^2 n^{-a})$ , it suffices to show that  $\text{var}(T_{b_1,b_2,c}) = o(p^2 n^{-a})$  for each  $(b_1, b_2, c)$  satisfying  $b_1 + b_2 \leq a - 1$ . Note that  $E(T_{b_1,b_2,c}) = 0$  under  $H_0$ , then  $\text{var}(T_{b_1,b_2,c}) = E(T_{b_1,b_2,c}^2)$  and

$$(B.9.6) \quad \text{var}(T_{b_1,b_2,c}) = (P_{2c-b_1}^{n_x} P_{2(a-c)-b_2}^{n_y})^{-2} \sum_{\substack{1 \leq j_1, j_2 \leq p; \\ 1 \leq \tilde{j}_1, \tilde{j}_2 \leq p}} \sum_{\substack{\mathbf{i}, \tilde{\mathbf{i}} \in \mathcal{P}(n_x, 2c-b_1); \\ \mathbf{w}, \tilde{\mathbf{w}} \in \mathcal{P}(n_y, 2(a-c)-b_2)}} \\ \mathbb{T}(\mathbf{i}, \tilde{\mathbf{i}}, \mathbf{w}, \tilde{\mathbf{w}}, j_1, j_2, \tilde{j}_1, \tilde{j}_2),$$

where we let

$$\mathbb{T}(\mathbf{i}, \tilde{\mathbf{i}}, \mathbf{w}, \tilde{\mathbf{w}}, j_1, j_2, \tilde{j}_1, \tilde{j}_2) \\ = E \left\{ \prod_{k=1}^{b_1} (x_{i_k, j_1} x_{i_k, j_2} - \sigma_{j_1, j_2}) (x_{\tilde{i}_k, \tilde{j}_1} x_{\tilde{i}_k, \tilde{j}_2} - \sigma_{\tilde{j}_1, \tilde{j}_2}) \prod_{k=b_1+1}^c (x_{i_k, j_1} x_{\tilde{i}_k, \tilde{j}_1}) \right. \\ \times \prod_{k=c+1}^{2c-b_1} (x_{i_k, j_2} x_{\tilde{i}_k, \tilde{j}_2}) \left. \right\} E \left\{ \prod_{m=1}^{b_2} (y_{w_m, j_1} y_{w_m, j_2} - \sigma_{j_1, j_2}) (y_{\tilde{w}_m, \tilde{j}_1} y_{\tilde{w}_m, \tilde{j}_2} - \sigma_{\tilde{j}_1, \tilde{j}_2}) \right. \\ \times \prod_{m=b_2+1}^{a-c} (y_{w_m, j_1} y_{\tilde{w}_m, \tilde{j}_1}) \prod_{m=a-c+1}^{2(a-c)-b_2} (y_{w_m, j_2} y_{\tilde{w}_m, \tilde{j}_2}) \left. \right\}.$$

Since we assume without loss of generality that  $E(\mathbf{x}) = E(\mathbf{y}) = \mathbf{0}$ , then  $E(x_{1,j_1} x_{1,j_2} - \sigma_{j_1, j_2}) = E(y_{1,j_1} x_{1,j_2} - \sigma_{j_1, j_2}) = 0$ . It follows that when  $\{\mathbf{i}\} \neq \{\tilde{\mathbf{i}}\}$  or  $\{\mathbf{w}\} \neq \{\tilde{\mathbf{w}}\}$ ,  $\mathbb{T}(\mathbf{i}, \tilde{\mathbf{i}}, \mathbf{w}, \tilde{\mathbf{w}}, j_1, j_2, \tilde{j}_1, \tilde{j}_2) = 0$ . When  $\{\mathbf{i}\} = \{\tilde{\mathbf{i}}\}$  and  $\{\mathbf{w}\} = \{\tilde{\mathbf{w}}\}$ , we have  $|\{\mathbf{i}\} \cup \{\tilde{\mathbf{i}}\}| + |\{\mathbf{w}\} \cup \{\tilde{\mathbf{w}}\}| = 2c - b_1 + 2(a - c) - b_2$ . By Condition

A.5 (1) and (2), for any given  $\{j_1, j_2, \tilde{j}_1, \tilde{j}_2\}$ ,

$$(B.9.7) \quad (P_{2c-b_1}^{n_x} P_{2(a-c)-b_2}^{n_y})^{-2} \sum_{\substack{\mathbf{i}, \tilde{\mathbf{i}} \in \mathcal{P}(n_x, 2c-b_1); \\ \mathbf{w}, \tilde{\mathbf{w}} \in \mathcal{P}(n_y, 2(a-c)-b_2)}} \mathbb{T}(\mathbf{i}, \tilde{\mathbf{i}}, \mathbf{w}, \tilde{\mathbf{w}}, j_1, j_2, \tilde{j}_1, \tilde{j}_2) \\ = O(n^{-2(2a+b_1+b_2)} \times n^{2a-b_1-b_2}) = O(n^{-2a+b_1+b_2}) = o(n^{-a-1})$$

where in the last equation, we use  $b_1 + b_2 \leq a - 1$ . In addition, similarly to (B.9.2), we have that for any given  $(\mathbf{i}, \tilde{\mathbf{i}}, \mathbf{w}, \tilde{\mathbf{w}})$ ,

$$(B.9.8) \quad \sum_{1 \leq j_1, j_2, \tilde{j}_1, \tilde{j}_2 \leq p} \mathbb{T}(\mathbf{i}, \tilde{\mathbf{i}}, \mathbf{w}, \tilde{\mathbf{w}}, j_1, j_2, \tilde{j}_1, \tilde{j}_2) = O(p^2).$$

In summary, by (B.9.7) and (B.9.8), we know  $\text{var}\{\tilde{\mathcal{U}}^*(a)\} = O(p^2 n^{-a-1}) = o(p^2 n^{-a})$ .

*B.9.1.2. Under Condition A.6.* In this section, we prove that  $\text{var}\{\tilde{\mathcal{U}}(a)\} = o(1)\text{var}\{\tilde{\mathcal{U}}^*(a)\}$  under Condition A.6. Recall that we have already obtained  $\text{var}\{\tilde{\mathcal{U}}(a)\}$  in (B.9.1). By Condition A.6 (3), we have

$$(B.9.9) \quad \mathbf{X}_{j_1, j_2, j_3, j_4} = \kappa_x (\sigma_{j_1, j_3} \sigma_{j_2, j_4} + \sigma_{j_1, j_4} \sigma_{j_2, j_3}) + (\kappa_x - 1) \sigma_{j_1, j_2} \sigma_{j_3, j_4}, \\ \mathbf{Y}_{j_1, j_2, j_3, j_4} = \kappa_y (\sigma_{j_1, j_3} \sigma_{j_2, j_4} + \sigma_{j_1, j_4} \sigma_{j_2, j_3}) + (\kappa_y - 1) \sigma_{j_1, j_2} \sigma_{j_3, j_4}.$$

Then by Condition A.6 (1) and (4), we know  $(\mathbf{X}_{j_1, j_2, j_3, j_4})^m (\mathbf{Y}_{j_1, j_2, j_3, j_4})^{a-m}$  is a linear combination of

$$(B.9.10) \quad \prod_{t=1}^a \left\{ \sigma_{g_1^{(t)}, j_{g_2^{(t)}}} \times \sigma_{j_{g_3^{(t)}}, j_{g_4^{(t)}}} \right\},$$

where  $\{(g_1^{(t)}, g_2^{(t)}), (g_3^{(t)}, g_4^{(t)}) : t = 1, \dots, a\}$  are  $a$  allocations of the set  $\{1, 2, 3, 4\}$  into 2 (unordered) pairs. When the  $a$  allocations are the same, by the symmetricity of  $j$  indexes,

$$\sum_{1 \leq j_1, j_2, j_3, j_4 \leq p} \prod_{t=1}^a \sigma_{g_1^{(t)}, j_{g_2^{(t)}}} \sigma_{j_{g_3^{(t)}}, j_{g_4^{(t)}}} = \sum_{1 \leq j_1, j_2, j_3, j_4 \leq p} (\sigma_{j_1, j_3} \sigma_{j_2, j_4})^a.$$

When the  $a$  allocations are different, by Condition A.6 (4),

$$(B.9.11) \quad \sum_{1 \leq j_1, j_2, j_3, j_4 \leq p} \prod_{t=1}^a \sigma_{g_1^{(t)}, j_{g_2^{(t)}}} \sigma_{j_{g_3^{(t)}}, j_{g_4^{(t)}}} = o(1) \sum_{1 \leq j_1, j_2, j_3, j_4 \leq p} (\sigma_{j_1, j_3} \sigma_{j_2, j_4})^a,$$

which can be obtained by taking square of both sides of (B.9.11) and using Condition A.6 (4). It follows that by (B.9.1), Condition A.6 (1) and (4) and the symmetricity of  $j$  indexes,

$$(B.9.12) \quad \text{var}\{\tilde{\mathcal{U}}(a)\} = \Theta(n^{-a}) \sum_{1 \leq j_1, j_2, j_3, j_4 \leq p} (\sigma_{j_1, j_3} \sigma_{j_2, j_4})^a.$$

We next show  $\text{var}\{\tilde{\mathcal{U}}^*(a)\} = o(1)\text{var}\{\tilde{\mathcal{U}}(a)\}$ . Similarly to Section B.9.1.1, we know it suffices to prove  $\text{var}(T_{b_1, b_2, c}) = o(1)\text{var}\{\tilde{\mathcal{U}}(a)\}$  for  $0 \leq c \leq a$ ,  $0 \leq b_1 \leq c$ ,  $0 \leq b_2 \leq a - c$  and  $b_1 + b_2 \leq a - 1$ . Note that (B.9.6) still holds here, and when  $\{\mathbf{i}\} \neq \{\tilde{\mathbf{i}}\}$  or  $\{\mathbf{w}\} \neq \{\tilde{\mathbf{w}}\}$ ,  $\mathbb{T}(\mathbf{i}, \tilde{\mathbf{i}}, \mathbf{w}, \tilde{\mathbf{w}}, j_1, j_2, \tilde{j}_1, \tilde{j}_2) = 0$ . Therefore, (B.9.7) also holds. By Condition A.6 (3) and (4), similarly to the analysis of (B.9.12), we have for any given  $(\mathbf{i}, \tilde{\mathbf{i}}, \mathbf{w}, \tilde{\mathbf{w}})$ ,

$$(B.9.13) \quad \begin{aligned} & \sum_{1 \leq j_1, j_2, j_3, j_4 \leq p} \mathbb{T}(\mathbf{i}, \tilde{\mathbf{i}}, \mathbf{w}, \tilde{\mathbf{w}}, j_1, j_2, \tilde{j}_1, \tilde{j}_2) \\ &= O(1) \sum_{1 \leq j_1, j_2, j_3, j_4 \leq p} (\sigma_{j_1, j_3} \sigma_{j_2, j_4})^a. \end{aligned}$$

Combining (B.9.7) and (B.9.13),

$$\text{var}(T_{b_1, b_2, c}) = O(n^{-a-1}) \sum_{1 \leq j_1, j_2, j_3, j_4 \leq p} (\sigma_{j_1, j_3} \sigma_{j_2, j_4})^a = o(1)\text{var}\{\tilde{\mathcal{U}}(a)\}.$$

**B.9.2. Proof of Lemma A.13.2 (on Page 25, Section A.13).** Since  $\mathbb{E}\{\mathcal{U}(a)\} = \mathbb{E}\{\mathcal{U}(b)\} = 0$  under  $H_0$ ,  $\text{cov}\{\mathcal{U}(a)/\sigma(a), \mathcal{U}(b)/\sigma(b)\} = \mathbb{E}\{\mathcal{U}(a)\mathcal{U}(b)\}/\{\sigma(a)\sigma(b)\}$ . Recall that  $\mathcal{U}(a) = \tilde{\mathcal{U}}(a) + \tilde{\mathcal{U}}^*(a)$  and  $\mathcal{U}(b) = \tilde{\mathcal{U}}(b) + \tilde{\mathcal{U}}^*(b)$ . Then

$$(B.9.14) \quad \begin{aligned} \mathbb{E}\left\{\frac{\mathcal{U}(a)}{\sigma(a)} \times \frac{\mathcal{U}(b)}{\sigma(b)}\right\} &= \mathbb{E}\left\{\frac{\tilde{\mathcal{U}}(a) + \tilde{\mathcal{U}}^*(a)}{\sigma(a)} \times \frac{\tilde{\mathcal{U}}(b) + \tilde{\mathcal{U}}^*(b)}{\sigma(b)}\right\} \\ &= \mathbb{E}\left\{\frac{\tilde{\mathcal{U}}(a)\tilde{\mathcal{U}}(b)}{\sigma(a)\sigma(b)}\right\} + o(1), \end{aligned}$$

where the last equation follows by Lemma A.13.1. By the definition and notation in Section B.9.1,

$$\tilde{\mathcal{U}}(a) = \tilde{C}_a \sum_{\substack{1 \leq j_1, j_2 \leq p; \\ \mathbf{i} \in \mathcal{P}(n_x, a); \\ \mathbf{w} \in \mathcal{P}(n_y, a)}} \mathbb{D}_{\mathbf{x}, \mathbf{y}}(\mathbf{i}, \mathbf{w}, j_1, j_2), \quad \tilde{\mathcal{U}}(b) = \tilde{C}_b \sum_{\substack{1 \leq \tilde{j}_1, \tilde{j}_2 \leq p; \\ \tilde{\mathbf{i}} \in \mathcal{P}(n_x, b); \\ \tilde{\mathbf{w}} \in \mathcal{P}(n_y, b)}} \mathbb{D}_{\mathbf{x}, \mathbf{y}}(\tilde{\mathbf{i}}, \tilde{\mathbf{w}}, \tilde{j}_1, \tilde{j}_2),$$

where we let  $\tilde{C}_a = (P_a^{n_x} P_a^{n_y})^{-1}$ ,  $\tilde{C}_b = (P_b^{n_x} P_b^{n_y})^{-1}$ ,  $\mathbb{D}_{\mathbf{x}, \mathbf{y}}(\mathbf{i}, \mathbf{w}, j_1, j_2) = \prod_{t=1}^a (x_{i_t, j_1} x_{i_t, j_2} - y_{w_t, j_1} y_{w_t, j_2})$  and  $\mathbb{D}_{\mathbf{x}, \mathbf{y}}(\tilde{\mathbf{i}}, \tilde{\mathbf{w}}, \tilde{j}_1, \tilde{j}_2) = \prod_{t=1}^b (x_{\tilde{i}_t, \tilde{j}_1} x_{\tilde{i}_t, \tilde{j}_2} - y_{\tilde{w}_t, \tilde{j}_1} y_{\tilde{w}_t, \tilde{j}_2})$ .



$y_{\tilde{w}_t, \tilde{j}_1} y_{\tilde{w}_t, \tilde{j}_2}$ ). It follows that

$$\mathbb{E}\{\tilde{\mathcal{U}}(a)\tilde{\mathcal{U}}(b)\} = \tilde{C}_a \tilde{C}_b \sum_{\substack{1 \leq j_1, j_2, \tilde{j}_1, \tilde{j}_2 \leq p; \\ \mathbf{i} \in \mathcal{P}(n_x, a); \tilde{\mathbf{i}} \in \mathcal{P}(n_x, b) \\ \mathbf{w} \in \mathcal{P}(n_y, a); \tilde{\mathbf{w}} \in \mathcal{P}(n_y, b)}} \mathbb{E}\left\{\mathbb{D}_{\mathbf{x}, \mathbf{y}}(\mathbf{i}, \mathbf{w}, j_1, j_2) \mathbb{D}_{\mathbf{x}, \mathbf{y}}(\tilde{\mathbf{i}}, \tilde{\mathbf{w}}, \tilde{j}_1, \tilde{j}_2)\right\}.$$

As  $a \neq b$ , we know  $\{\mathbf{i}\} \neq \{\tilde{\mathbf{i}}\}$  and  $\{\mathbf{w}\} \neq \{\tilde{\mathbf{w}}\}$ . It follows that similarly to Section B.1.2,  $\mathbb{E}\{\mathbb{D}_{\mathbf{x}, \mathbf{y}}(\mathbf{i}, \mathbf{w}, j_1, j_2) \mathbb{D}_{\mathbf{x}, \mathbf{y}}(\tilde{\mathbf{i}}, \tilde{\mathbf{w}}, \tilde{j}_1, \tilde{j}_2)\} = 0$ . Therefore  $\mathbb{E}\{\tilde{\mathcal{U}}(a)\tilde{\mathcal{U}}(b)\} = 0$  and  $\text{cov}\{\mathcal{U}(a)/\sigma(a), \mathcal{U}(b)/\sigma(b)\} = o(1)$ .

**B.9.3. Derivation of  $D_{n,k}$  and  $\pi_{n,k}^2$ .** To prove Lemmas A.13.3 and A.13.4, we derive the forms of  $D_{n,k}$  and  $\pi_{n,k}^2$  in this section. By construction,  $D_{n,k} = \sum_{r=1}^m t_r A_{n,k,a_r}$ , where  $A_{n,k,a_r} = (\mathbb{E}_k - \mathbb{E}_{k-1})[\tilde{\mathcal{U}}(a_r)/\sigma(a_r)]$ . In addition,  $\pi_{n,k}^2 = \sum_{1 \leq r_1, r_2 \leq m} t_{r_1} t_{r_2} \mathbb{E}_{k-1}(A_{n,k,a_{r_1}} A_{n,k,a_{r_2}})$ . It then suffices to derive the form of  $A_{n,k,a}$  for a given integer  $a$ , and also derive  $\mathbb{E}_{k-1}(A_{n,k,a_1} A_{n,k,a_2})$  for two given integers  $a_1$  and  $a_2$ .

For easy presentation, we define  $\mathcal{X}_{i,j_1,j_2} = x_{i,j_1} x_{i_t, j_2} - \sigma_{j_1, j_2}$  and  $\mathcal{Y}_{i,j_1,j_2} = y_{i,j_1} y_{i_t, j_2} - \sigma_{j_1, j_2}$  in the following. Then under  $H_0$ ,

$$\tilde{\mathcal{U}}(a) = (P_a^{n_x} P_a^{n_y})^{-1} \sum_{\substack{1 \leq j_1, j_2 \leq p; \\ \mathbf{i} \in \mathcal{P}(n_x, a); \mathbf{w} \in \mathcal{P}(n_y, a)}} \prod_{t=1}^a (\mathcal{X}_{w_t, j_1, j_2} - \mathcal{Y}_{i_t, j_1, j_2}).$$

**B.9.3.1. Part I:  $1 \leq k \leq n_x$ .** When  $1 \leq k \leq n_x$ , similarly to Section B.1.4, as  $\mathbb{E}(\mathcal{X}_{1, j_1, j_2}) = 0$  under  $H_0$ , we have

$$(\mathbb{E}_k - \mathbb{E}_{k-1}) \left\{ \prod_{t=1}^a (\mathcal{X}_{i_t, j_1, j_2} - \mathcal{Y}_{w_t, j_1, j_2}) \right\} = (\mathbb{E}_k - \mathbb{E}_{k-1}) \left( \prod_{t=1}^a \mathcal{X}_{i_t, j_1, j_2} \right),$$

which is nonzero only when  $i_1, \dots, i_a \leq k$  and  $k \in \{i_1, \dots, i_a\}$ . Then we know when  $k < a$ ,  $A_{n,k,a} = 0$  and when  $k \geq a$ ,

$$(B.9.15) \quad A_{n,k,a} = c_1(n, a) \sum_{\substack{1 \leq j_1, j_2 \leq p; \\ \mathbf{i} \in \mathcal{P}(k-1, a-1)}} \left( \prod_{t=1}^{a-1} \mathcal{X}_{i_t, j_1, j_2} \right) \mathcal{X}_{k, j_1, j_2},$$

where  $c_1(n, a) = a! / \{P_a^{n_x} \sigma(a)\}$ . For two integers  $a_1$  and  $a_2$ ,

$$\begin{aligned} & \mathbb{E}_{k-1}(A_{n,k,a_1} A_{n,k,a_2}) \\ &= \prod_{l=1}^2 c(n, a_l) \sum_{\substack{1 \leq j_1, j_2, j_3, j_4 \leq p; \\ \mathbf{i}^{(l)} \in \mathcal{P}(k-1, a_l-1), l=1,2}} \mathbb{M}_{\mathbf{x}, \mathbf{y}, 1}(k, \mathbf{i}^{(l)}, j_{2l-1}, j_{2l} : l=1, 2), \end{aligned}$$

where

$$\begin{aligned} & \mathbb{M}_{\mathbf{x},\mathbf{y},1}(k, \mathbf{i}^{(l)}, j_{2l-1}, j_{2l} : l = 1, 2) \\ &= \prod_{l=1}^2 \left( \prod_{t=1}^{a_l-1} \mathcal{X}_{i_t^{(l)}, j_{2l-1}, j_{2l}} \right) \mathbb{E}(\mathcal{X}_{k, j_1, j_2} \mathcal{X}_{k, j_3, j_4}). \end{aligned}$$

*B.9.3.2. Part II:*  $n_x + 1 \leq k \leq n_x + n_y$ . When  $n_x + 1 \leq k \leq n_x + n_y$ , we have

$$\prod_{t=1}^a (\mathcal{X}_{i_t, j_1, j_2} - \mathcal{Y}_{i_t, j_1, j_2}) = \sum_{s=0}^a \sum_{\substack{\mathbf{i}^* \in \mathcal{S}(\mathbf{i}, s); \\ \mathbf{w}^* \in \mathcal{S}(\mathbf{w}, a-s)}} \left( \prod_{t=1}^s \mathcal{X}_{i_t^*, j_1, j_2} \right) \left( \prod_{\tilde{t}=1}^{a-s} \mathcal{Y}_{w_{\tilde{t}}^*, j_1, j_2} \right),$$

where  $\mathcal{S}(\mathbf{i}, s)$  represents the collection of sub-tuples of  $\mathbf{i}$  with length  $s$  and  $\mathcal{S}(\mathbf{w}, a-s)$  represents the collection of sub-tuples of  $\mathbf{w}$  with length  $a-s$ , which is similarly used in Section B.3.1. When  $n_x + 1 \leq k \leq n_x + n_y$ , similarly to Section B.1.4,  $(\mathbb{E}_k - \mathbb{E}_{k-1}) \{ \prod_{t=1}^s (x_{i_t^*, j_1} x_{i_t^*, j_2} - \sigma_{j_1, j_2}) \prod_{\tilde{t}=1}^{a-s} (y_{w_{\tilde{t}}^*, j_1} y_{w_{\tilde{t}}^*, j_2} - \sigma_{j_1, j_2}) \} \neq 0$  only when  $w_1^*, \dots, w_{a-s}^* \leq k - n_x$  and  $k - n_x \in \{w_1^*, \dots, w_{a-s}^*\}$ , and then

$$(\mathbb{E}_k - \mathbb{E}_{k-1}) \left( \prod_{t=1}^s \mathcal{X}_{i_t^*, j_1, j_2} \prod_{\tilde{t}=1}^{a-s} \mathcal{Y}_{w_{\tilde{t}}^*, j_1, j_2} \right) = \mathcal{Y}_{k-n_x, j_1, j_2} \prod_{t=1}^s \mathcal{X}_{i_t^*, j_1, j_2} \prod_{\tilde{t}=1}^{a-s-1} \mathcal{Y}_{w_{\tilde{t}}^*, j_1, j_2}.$$

It follows that

$$A_{n,k,a} = \sum_{s=L_k}^{a-1} \sum_{\substack{1 \leq j_1, j_2 \leq p; \\ \mathbf{i} \in \mathcal{P}(n_x, s); \\ \mathbf{w} \in \mathcal{P}(k-n_x-1, a-s-1)}} c_2(n, a, s) \mathcal{Y}_{k-n_x, j_1, j_2} \prod_{t=1}^s \mathcal{X}_{i_t, j_1, j_2} \prod_{\tilde{t}=1}^{a-s-1} \mathcal{Y}_{w_{\tilde{t}}, j_1, j_2},$$

where  $L_k = \max\{n_x - k + a, 0\}$  and  $c_2(n, a, s) = P_{a-s}^{n_x-s} P_s^{n_y-a+s} \{P_a^{n_x} P_a^{n_y} \sigma(a)\}^{-1}$ . Thus for two constants  $a_1$  and  $a_2$ ,

$$\begin{aligned} & \mathbb{E}_{k-1}(A_{n,k,a_1} A_{n,k,a_2}) \\ &= \sum_{\substack{1 \leq j_1, j_2, j_3, j_4 \leq p; \\ L_k \leq s_l \leq a_l : l=1,2; \\ \mathbf{i}^{(l)} \in \mathcal{P}(n_x, s_l) : l=1,2; \\ \mathbf{w}^{(l)} \in \mathcal{P}(k-n_x-1, a_l-s_l-1) : l=1,2}} \prod_{l=1}^2 c_2(n, a_l, s_l) \mathbb{M}_{\mathbf{x},\mathbf{y},2}(k - n_x, \mathbf{i}^{(l)}, j_{2l-1}, j_{2l} : l = 1, 2), \end{aligned}$$

where

$$\begin{aligned} & \mathbb{M}_{\mathbf{x},\mathbf{y},2}(k - n_x, \mathbf{i}^{(l)}, j_{2l-1}, j_{2l} : l = 1, 2) \\ &= \prod_{l=1}^2 \left( \prod_{t=1}^{s_l} \mathcal{X}_{i_t^{(l)}, j_{2l-1}, j_{2l}} \prod_{\tilde{t}=1}^{a_l-s_l-1} \mathcal{Y}_{w_{\tilde{t}}^{(l)}, j_{2l-1}, j_{2l}} \right) \mathbb{E}(\mathcal{Y}_{k-n_x, j_1, j_2} \mathcal{Y}_{k-n_x, j_3, j_4}). \end{aligned}$$

B.9.4. *Proof of Lemma A.13.3 (on Page 26, Section A.13).* Note that by the Cauchy-Schwarz inequality, for some constant  $C$ ,

$$\text{var}\left(\sum_{k=1}^n \pi_{n,k}^2\right) \leq Cn^2 \max_{1 \leq k \leq n; 1 \leq r_1, r_2 \leq m} \text{var}(\mathbb{T}_{k, a_{r_1}, a_{r_2}}),$$

where for two integers  $a_1$  and  $a_2$ ,  $\mathbb{T}_{k, a_1, a_2} = \mathbb{E}_{k-1}(A_{n, k, a_1} A_{n, k, a_2})$  is given in Section B.9.3. Therefore to prove Lemma A.13.3, it suffices to prove  $\text{var}(\mathbb{T}_{k, a_{r_1}, a_{r_2}}) = o(n^{-2})$  for every  $1 \leq k \leq n$  and  $1 \leq r_1, r_2 \leq m$ . We next prove  $\text{var}(\mathbb{T}_{k, a_1, a_2}) = o(n^{-2})$  when  $a \leq k \leq n_x$  and  $n_x + 1 \leq k \leq n_x + n_y$  in the following Parts I and II respectively.

*B.9.4.1. Part I:  $a \leq k \leq n_x$ .* We first derive the form of  $\text{var}(\mathbb{T}_{k, a_1, a_2})$  when  $a \leq k \leq n_x$ . As  $\text{var}(\mathbb{T}_{k, a_1, a_2}) = \mathbb{E}(\mathbb{T}_{k, a_1, a_2}^2) - \{\mathbb{E}(\mathbb{T}_{k, a_1, a_2})\}^2$ , we next derive  $\mathbb{E}(\mathbb{T}_{k, a_1, a_2})$  and  $\mathbb{E}(\mathbb{T}_{k, a_1, a_2}^2)$ . In particular,

$$\mathbb{E}(\mathbb{T}_{k, a_1, a_2}) = \prod_{l=1}^2 c(n, a_l) \sum_{\substack{1 \leq j_1, j_2, j_3, j_4 \leq p; \\ \mathbf{i}^{(l)} \in \mathcal{P}(k-1, a_l-1), l=1,2}} \mathbb{E}\left\{\mathbb{M}_{\mathbf{x}, \mathbf{y}, 1}(k, \mathbf{i}^{(l)}, j_{2l-1}, j_{2l} : l = 1, 2)\right\}.$$

For easy presentation, we let  $a_3 = a_1$  and  $a_4 = a_2$ , and have

$$\begin{aligned} & \left\{\mathbb{E}(\mathbb{T}_{k, a_1, a_2})\right\}^2 \\ &= \prod_{l=1}^4 c(n, a_l) \sum_{\substack{1 \leq j_1, j_2, j_3, j_4, j_5, j_6, j_7, j_8 \leq p; \\ \mathbf{i}^{(l)} \in \mathcal{P}(k-1, a_l-1), l=1,2,3,4}} \mathbb{E}\left\{\mathbb{M}_{\mathbf{x}, \mathbf{y}, 1}(k, \mathbf{i}^{(l)}, j_{2l-1}, j_{2l} : l = 1, 2)\right\} \\ & \quad \times \mathbb{E}\left\{\mathbb{M}_{\mathbf{x}, \mathbf{y}, 1}(k, \mathbf{i}^{(l)}, j_{2l-1}, j_{2l} : l = 3, 4)\right\}. \end{aligned}$$

In addition, we have

$$\begin{aligned} \mathbb{E}(\mathbb{T}_{k, a_1, a_2}^2) &= \prod_{l=1}^4 c(n, a_l) \sum_{\substack{1 \leq j_1, j_2, j_3, j_4, j_5, j_6, j_7, j_8 \leq p; \\ \mathbf{i}^{(l)} \in \mathcal{P}(k-1, a_l-1), l=1,2,3,4}} \\ & \quad \mathbb{E}\left\{\mathbb{M}_{\mathbf{x}, \mathbf{y}, 1}(k, \mathbf{i}^{(l)}, j_{2l-1}, j_{2l} : l = 1, 2, 3, 4)\right\}, \end{aligned}$$

where we define

$$\begin{aligned} & \mathbb{M}_{\mathbf{x}, \mathbf{y}, 1}(k, \mathbf{i}^{(l)}, j_{2l-1}, j_{2l} : l = 1, 2, 3, 4) \\ &= \prod_{l=1}^4 \left( \prod_{t=1}^{a_l-1} \mathcal{X}_{i_t^{(l)}, j_{2l-1}, j_{2l}} \right) \mathbb{E}(\mathcal{X}_{k, j_1, j_2} \mathcal{X}_{k, j_3, j_4}) \mathbb{E}(\mathcal{X}_{k, j_5, j_6} \mathcal{X}_{k, j_7, j_8}). \end{aligned}$$

Let  $\mathbf{1}_E$  be an indicator function of the event that  $(\{\mathbf{i}^{(1)}\} \cup \{\mathbf{i}^{(2)}\}) \cap (\{\mathbf{i}^{(3)}\} \cup \{\mathbf{i}^{(4)}\}) = \emptyset$ . Then define

$$G_{a_1, a_2, 1} = \prod_{l=1}^4 c(n, a_l) \sum_{\substack{1 \leq j_1, j_2, j_3, j_4, j_5, j_6, j_7, j_8 \leq p; \\ \mathbf{i}^{(l)} \in \mathcal{P}(k-1, a_l-1), l=1, 2, 3, 4}} \times \mathbf{1}_E \\ \times \mathbb{E} \left\{ \mathbb{M}_{\mathbf{x}, \mathbf{y}, 1}(k, \mathbf{i}^{(l)}, j_{2l-1}, j_{2l} : l = 1, 2, 3, 4) \right\}.$$

We also note that

$$(B.9.16) \quad \mathbb{E} \left\{ \mathbb{M}_{\mathbf{x}, \mathbf{y}, 1}(k, \mathbf{i}^{(l)}, j_{2l-1}, j_{2l} : l = 1, 2, 3, 4) \right\} \times \mathbf{1}_E \\ = \mathbb{E} \left\{ \mathbb{M}_{\mathbf{x}, \mathbf{y}, 1}(k, \mathbf{i}^{(l)}, j_{2l-1}, j_{2l} : l = 1, 2) \right\} \\ \times \mathbb{E} \left\{ \mathbb{M}_{\mathbf{x}, \mathbf{y}, 1}(k, \mathbf{i}^{(l)}, j_{2l-1}, j_{2l} : l = 3, 4) \right\} \times \mathbf{1}_E.$$

Since  $|\text{var}(\mathbb{T}_{k, a_1, a_2})| \leq |\mathbb{E}(\mathbb{T}_{k, a_1, a_2}^2) - G_{a_1, a_2, 1}| + |\{\mathbb{E}(\mathbb{T}_{k, a_1, a_2})\}^2 - G_{a_1, a_2, 1}|$ , to prove  $\text{var}(\mathbb{T}_{k, a_1, a_2}) = o(n^{-2})$ , we will next show that  $|\{\mathbb{E}(\mathbb{T}_{k, a_1, a_2})\}^2 - G_{a_1, a_2, 1}| = o(n^{-2})$  and  $|\mathbb{E}(\mathbb{T}_{k, a_1, a_2}^2) - G_{a_1, a_2, 1}| = o(n^{-2})$ . In particular, we present the proof under Conditions A.5 and A.6 in the following Sections B.9.4.1.1 and B.9.4.1.2, respectively.

#### B.9.4.1.1. Proof under Condition A.5.

*Step I:*  $|\{\mathbb{E}(\mathbb{T}_{k, a_1, a_2})\}^2 - G_{a_1, a_2, 1}| = o(n^{-2})$ . If  $a_1 \neq a_2$ , we have  $\mathbb{E}(\mathbb{T}_{k, a_1, a_2}) = G_{a_1, a_2, 1} = 0$ . It remains to consider  $a_1 = a_2$  below. Note that

$$(B.9.17) \quad \mathbb{E} \left\{ \mathbb{M}_{\mathbf{x}, \mathbf{y}, 1}(k, \mathbf{i}^{(l)}, j_{2l-1}, j_{2l} : l = 1, 2) \right\} \\ \times \mathbb{E} \left\{ \mathbb{M}_{\mathbf{x}, \mathbf{y}, 1}(k, \mathbf{i}^{(l)}, j_{2l-1}, j_{2l} : l = 3, 4) \right\}$$

satisfies that (B.9.17)  $\neq 0$  only if  $\{\mathbf{i}^{(1)}\} = \{\mathbf{i}^{(2)}\}$  and  $\{\mathbf{i}^{(3)}\} = \{\mathbf{i}^{(4)}\}$ . Thus,

$$\{\mathbb{E}(\mathbb{T}_{k, a_1, a_2})\}^2 = \prod_{l=1}^4 c(n, a_l) \sum_{\substack{1 \leq j_1, j_2, j_3, j_4, j_5, j_6, j_7, j_8 \leq p; \\ \mathbf{i}^{(l)} \in \mathcal{P}(k-1, a_l-1), l=1, 2, 3, 4}} \mathbf{1}_{\left\{ \begin{array}{l} \{\mathbf{i}^{(1)}\} = \{\mathbf{i}^{(2)}\}, \\ \{\mathbf{i}^{(3)}\} = \{\mathbf{i}^{(4)}\} \end{array} \right\}} \times (B.9.17).$$

Similarly,  $\mathbb{E} \left\{ \mathbb{M}_{\mathbf{x}, \mathbf{y}, 1}(k, \mathbf{i}^{(l)}, j_{2l-1}, j_{2l} : l = 1, 2, 3, 4) \right\} \times \mathbf{1}_E \neq 0$  only when  $\{\mathbf{i}^{(1)}\} = \{\mathbf{i}^{(2)}\}$  and  $\{\mathbf{i}^{(3)}\} = \{\mathbf{i}^{(4)}\}$ . Therefore, by (B.9.16),

$$G_{a_1, a_2, 1} = \prod_{l=1}^4 c(n, a_l) \sum_{\substack{1 \leq j_1, j_2, j_3, j_4, j_5, j_6, j_7, j_8 \leq p; \\ \mathbf{i}^{(l)} \in \mathcal{P}(k-1, a_l-1), l=1, 2, 3, 4}} \mathbf{1}_{\left\{ \begin{array}{l} \{\mathbf{i}^{(1)}\} = \{\mathbf{i}^{(2)}\}, \\ \{\mathbf{i}^{(3)}\} = \{\mathbf{i}^{(4)}\}, \\ \{\mathbf{i}^{(1)}\} \cap \{\mathbf{i}^{(3)}\} = \emptyset \end{array} \right\}} \times (B.9.17),$$

and then

$$(B.9.18) \quad \left| \{E(\mathbb{T}_{k,a_1,a_2})\}^2 - G_{a_1,a_2,1} \right| \\ \leq \prod_{l=1}^4 c(n, a_l) \sum_{\substack{1 \leq j_1, j_2, j_3, j_4, j_5, j_6, j_7, j_8 \leq p; \\ \mathbf{i}^{(l)} \in \mathcal{P}(k-1, a_l-1), l=1,2,3,4}} \mathbf{1}_{\left\{ \begin{array}{l} \{\mathbf{i}^{(1)}\} = \{\mathbf{i}^{(2)}\}, \\ \{\mathbf{i}^{(3)}\} = \{\mathbf{i}^{(4)}\}, \\ \{\mathbf{i}^{(1)}\} \cap \{\mathbf{i}^{(3)}\} \neq \emptyset \end{array} \right\}} \times |(B.9.17)|.$$

Note that

$$(B.9.19) \quad \sum_{\mathbf{i}^{(l)} \in \mathcal{P}(k-1, a_l-1), l=1,2,3,4} \mathbf{1}_{\left\{ \begin{array}{l} \{\mathbf{i}^{(1)}\} = \{\mathbf{i}^{(2)}\}, \\ \{\mathbf{i}^{(3)}\} = \{\mathbf{i}^{(4)}\}, \\ \{\mathbf{i}^{(1)}\} \cap \{\mathbf{i}^{(3)}\} \neq \emptyset \end{array} \right\}} = O(n^{a_1+a_2-3}).$$

In addition, by Condition A.5 (2),

$$(B.9.20) \quad \sum_{1 \leq j_1, j_2, j_3, j_4, j_5, j_6, j_7, j_8 \leq p} |(B.9.17)| \\ \leq C \sum_{1 \leq j_1, j_2, j_3, j_4, j_5, j_6, j_7, j_8 \leq p} \left| E(\mathcal{X}_{k,j_1,j_2} \mathcal{X}_{k,j_3,j_4}) E(\mathcal{X}_{k,j_5,j_6} \mathcal{X}_{k,j_7,j_8}) \right|.$$

Recall that  $E(\mathcal{X}_{k,j_1,j_2} \mathcal{X}_{k,j_3,j_4}) = \mathbf{X}_{j_1,j_2,j_3,j_4}$  and  $E(\mathcal{X}_{k,j_5,j_6} \mathcal{X}_{k,j_7,j_8}) = \mathbf{X}_{j_5,j_6,j_7,j_8}$  following the notation in Section B.9.1. Following the similar analysis for the proof of (B.9.2), we obtain  $\sum_{1 \leq j_1, j_2, j_3, j_4 \leq p} |\mathbf{X}_{j_1,j_2,j_3,j_4}| = O(p^2)$  and  $\sum_{1 \leq j_5, j_6, j_7, j_8 \leq p} |\mathbf{X}_{j_5,j_6,j_7,j_8}| = O(p^2)$ . It follows that (B.9.20) =  $O(p^4)$ . Note that  $c(n, a) = \Theta(p^{-1}n^{-a/2})$  by Lemma A.13.1. Combining (B.9.19) and (B.9.20), we obtain  $\{E(\mathbb{T}_{k,a_1,a_2})\}^2 - G_{a_1,a_2,1} = o(n^{-2})$ .

*Step II:*  $|E(\mathbb{T}_{k,a_1,a_2}^2) - G_{a_1,a_2,1}| = o(n^{-2})$ . By construction, we have

$$(B.9.21) \quad E(\mathbb{T}_{k,a_1,a_2}^2) - G_{a_1,a_2,1} = \prod_{l=1}^4 c(n, a_l) \sum_{\substack{1 \leq j_1, j_2, j_3, j_4, j_5, j_6, j_7, j_8 \leq p; \\ \mathbf{i}^{(l)} \in \mathcal{P}(k-1, a_l-1), l=1,2,3,4}} (1 - \mathbf{1}_E) \\ \times E\left\{ \mathbb{M}_{\mathbf{x},\mathbf{y},1}(k, \mathbf{i}^{(l)}, j_{2l-1}, j_{2l} : l = 1, 2, 3, 4) \right\}.$$

When  $|\cup_{l=1}^4 \{\mathbf{i}^{(l)}\}| > a_1 + a_2 - 2$ , which means that there exists one index that only appears once among the four sets  $\{\mathbf{i}^{(l)}\}$ ,  $l = 1, 2, 3, 4$ , then similarly to Section B.1.5,

$$(B.9.22) \quad E\left\{ \mathbb{M}_{\mathbf{x},\mathbf{y},1}(k, \mathbf{i}^{(l)}, j_{2l-1}, j_{2l} : l = 1, 2) \right\} \times (1 - \mathbf{1}_E)$$

satisfies that (B.9.22) = 0. When  $|\cup_{l=1}^4 \{\mathbf{i}^{(l)}\}| < a_1 + a_2 - 2$ ,

$$(B.9.23) \quad \sum_{\mathbf{i}^{(l)} \in \mathcal{P}(k-1, a_l-1), l=1,2,3,4} \mathbf{1}_{\{|\cup_{l=1}^4 \{\mathbf{i}^{(l)}\}| < a_1 + a_2 - 2\}} = O(n^{a_1 + a_2 - 3}).$$

Similarly to the analysis of (B.9.20) above, by Condition A.5, we have

$$(B.9.24) \quad \sum_{1 \leq j_1, j_2, j_3, j_4, j_5, j_6, j_7, j_8 \leq p} (B.9.22) = O(p^4).$$

Therefore, by (B.9.23), (B.9.24) and  $c(n, a) = \Theta(p^{-1}n^{-a/2})$ ,

$$\begin{aligned} & \prod_{l=1}^4 c(n, a_l) \sum_{\substack{1 \leq j_1, j_2, j_3, j_4, j_5, j_6, j_7, j_8 \leq p; \\ \mathbf{i}^{(l)} \in \mathcal{P}(k-1, a_l-1), l=1,2,3,4}} (1 - \mathbf{1}_E) \mathbf{1}_{\{|\cup_{l=1}^4 \{\mathbf{i}^{(l)}\}| < a_1 + a_2 - 2\}} \\ & \quad \times \mathbb{E} \left\{ \mathbb{M}_{\mathbf{x}, \mathbf{y}, 1}(k, \mathbf{i}^{(l)}, j_{2l-1}, j_{2l} : l = 1, 2) \right\} \\ & = O(1)n^{-a_1 - a_2} p^{-4} n^{a_1 + a_2 - 3} p^4 = o(n^{-2}). \end{aligned}$$

Last, we consider  $|\cup_{l=1}^4 \{\mathbf{i}^{(l)}\}| = a_1 + a_2 - 2$ . Note that  $1 - \mathbf{1}_E \neq 0$  indicates that  $(\{\mathbf{i}^{(1)}\} \cup \{\mathbf{i}^{(2)}\}) \cap (\{\mathbf{i}^{(3)}\} \cup \{\mathbf{i}^{(4)}\}) \neq \emptyset$  under this case. By the symmetricity of the  $j$  indexes, we have

$$(B.9.25) \quad \left| \sum_{1 \leq j_1, j_2, j_3, j_4, j_5, j_6, j_7, j_8 \leq p} (B.9.22) \right| \\ \leq C \sum_{1 \leq j_1, j_2, j_3, j_4, j_5, j_6, j_7, j_8 \leq p} \left| \mathbb{E}(\mathcal{X}_{k, j_1, j_2} \mathcal{X}_{k, j_3, j_4}) \mathbb{E}(\mathcal{X}_{k, j_5, j_6} \mathcal{X}_{k, j_7, j_8}) \right. \\ \left. \times \mathbb{E}(\mathcal{X}_{k, j_1, j_2} \mathcal{X}_{k, j_5, j_6}) \mathbb{E}(\mathcal{X}_{k, j_3, j_4} \mathcal{X}_{k, j_7, j_8}) \right|.$$

Following similar arguments to that in Sections B.1.5.2 and B.9.1.1, by discussing different cases of  $j$  indexes, we have (B.9.25) =  $o(p^4)$ . Thus,

$$\begin{aligned} & \prod_{l=1}^4 c(n, a_l) \sum_{\substack{1 \leq j_1, j_2, j_3, j_4, j_5, j_6, j_7, j_8 \leq p; \\ \mathbf{i}^{(l)} \in \mathcal{P}(k-1, a_l-1), l=1,2,3,4}} (1 - \mathbf{1}_E) \mathbf{1}_{\{|\cup_{l=1}^4 \{\mathbf{i}^{(l)}\}| = a_1 + a_2 - 2\}} \\ & \quad \times \mathbb{E} \left\{ \mathbb{M}_{\mathbf{x}, \mathbf{y}, 1}(k, \mathbf{i}^{(l)}, j_{2l-1}, j_{2l} : l = 1, 2) \right\} \\ & = o(1)n^{-a_1 - a_2} p^{-4} n^{a_1 + a_2 - 2} p^4 = o(n^{-2}). \end{aligned}$$

In summary, we obtain  $\mathbb{E}(\mathbb{T}_{k, a_1, a_2}^2) - G_{a_1, a_2, 1} = o(n^{-2})$ .

*B.9.4.1.2. Proof under Condition A.6.* Similarly to Section B.9.4.1.1, we next prove  $|\{E(\mathbb{T}_{k,a_1,a_2})\}^2 - G_{a_1,a_2,1}| = o(n^{-2})$  and  $|\mathbb{E}(\mathbb{T}_{k,a_1,a_2}^2) - G_{a_1,a_2,1}| = o(n^{-2})$ .

*Step I:*  $|\{E(\mathbb{T}_{k,a_1,a_2})\}^2 - G_{a_1,a_2,1}| = o(n^{-2})$ . Following the same analysis in Section B.9.4.1.1, we obtain (B.9.18) and (B.9.19). By Condition A.6 (2) and (4), we have

$$(B.9.26) \quad \sum_{1 \leq j_1, j_2, j_3, j_4, j_5, j_6, j_7, j_8 \leq p} \quad (B.9.17) \\ = O(1) \left\{ \sum_{1 \leq j_1, j_2, j_3, j_4 \leq p} (\sigma_{j_1, j_2} \sigma_{j_3, j_4})^{a_1} \right\} \left\{ \sum_{1 \leq j_5, j_6, j_7, j_8 \leq p} (\sigma_{j_5, j_6} \sigma_{j_7, j_8})^{a_2} \right\}.$$

Note that  $\sigma^2(a) = \Theta(n^{-a}) \times \sum_{1 \leq j_1, j_2, j_3, j_4 \leq p} (\sigma_{j_1, j_3} \sigma_{j_2, j_4})^a$  by Lemma A.13.1, and  $c(n, a) = \Theta(1) \{n^a \sigma(a)\}^{-1}$ . Combining (B.9.19) and (B.9.26), we have  $|\{E(\mathbb{T}_{k,a_1,a_2})\}^2 - G_{a_1,a_2,1}| = o(n^{-2})$ .

*Step II:*  $|\mathbb{E}(\mathbb{T}_{k,a_1,a_2}^2) - G_{a_1,a_2,1}| = o(n^{-2})$ . Similarly to Section B.9.4.1.1, we have (B.9.21) and  $\mathbb{E}\{\mathbb{M}_{\mathbf{x},\mathbf{y},1}(k, \mathbf{i}^{(l)}, j_{2l-1}, j_{2l} : l = 1, 2, 3, 4)\} \neq 0$  only when  $|\cup_{l=1}^4 \{\mathbf{i}^{(l)}\}| \leq a_1 + a_2 - 2$ .

When  $|\cup_{l=1}^4 \{\mathbf{i}^{(l)}\}| < a_1 + a_2 - 2$ , (B.9.23) still holds. By Condition A.6 (2) and (4), similarly to (B.9.26), we have

$$\sum_{1 \leq j_1, j_2, j_3, j_4, j_5, j_6, j_7, j_8 \leq p} \mathbb{E}\left\{\mathbb{M}_{\mathbf{x},\mathbf{y},1}(k, \mathbf{i}^{(l)}, j_{2l-1}, j_{2l} : l = 1, 2, 3, 4)\right\} \\ = O(1) \left\{ \sum_{1 \leq j_1, j_2, j_3, j_4 \leq p} (\sigma_{j_1, j_2} \sigma_{j_3, j_4})^{a_1} \right\} \left\{ \sum_{1 \leq j_5, j_6, j_7, j_8 \leq p} (\sigma_{j_5, j_6} \sigma_{j_7, j_8})^{a_2} \right\}.$$

Note that  $\sigma^2(a) = \Theta(n^{-a}) \times \sum_{1 \leq j_1, j_2, j_3, j_4 \leq p} (\sigma_{j_1, j_3} \sigma_{j_2, j_4})^a$  by Lemma A.13.1, and  $c(n, a) = \Theta(1) \{n^a \sigma(a)\}^{-1}$ . Then we have

$$\prod_{l=1}^4 c(n, a_l) \sum_{\substack{1 \leq j_1, j_2, j_3, j_4, j_5, j_6, j_7, j_8 \leq p; \\ \mathbf{i}^{(l)} \in \mathcal{P}(k-1, a_l-1), l=1, 2, 3, 4}} \mathbf{1}_{\{|\cup_{l=1}^4 \{\mathbf{i}^{(l)}\}| < a_1 + a_2 - 2\}} \\ \times \mathbb{E}\left\{\mathbb{M}_{\mathbf{x},\mathbf{y},1}(k, \mathbf{i}^{(l)}, j_{2l-1}, j_{2l} : l = 1, 2, 3, 4)\right\} = o(n^{-2}).$$

When  $|\cup_{l=1}^4 \{\mathbf{i}^{(l)}\}| = a_1 + a_2 - 2$ , by the construction of  $\mathbf{1}_E$ , we know

$$(B.9.27) \quad \mathbb{E}\left\{\mathbb{M}_{\mathbf{x},\mathbf{y},1}(k, \mathbf{i}^{(l)}, j_{2l-1}, j_{2l} : l = 1, 2, 3, 4)\right\} \times (1 - \mathbf{1}_E)$$

satisfies that (B.9.27)  $\neq 0$  if  $(\{\mathbf{i}^{(1)}\} \cup \{\mathbf{i}^{(2)}\}) \cap (\{\mathbf{i}^{(3)}\} \cup \{\mathbf{i}^{(4)}\}) \neq \emptyset$ . Then by Condition A.6 (3) and (4), we know (B.9.27) is a linear combination of  $\sum_{1 \leq j_1, \dots, j_8 \leq p} \prod_{t=1}^{a+b} \sigma_{j_{g_{2t-1}}, j_{g_{2t}}}$  with  $S_{\mathcal{G}} > 4$ , where we recall that  $S_{\mathcal{G}}$  is the number of distinct sets among  $\{g_{2t-1}, g_{2t}\}, t = 1, \dots, a+b$ , induced by  $\mathcal{G} = (g_1, \dots, g_{2(a+b)})$ . Therefore,

$$\begin{aligned} & \prod_{l=1}^4 c(n, a_l) \sum_{\substack{1 \leq j_1, j_2, j_3, j_4, j_5, j_6, j_7, j_8 \leq p; \\ \mathbf{i}^{(l)} \in \mathcal{P}(k-1, a_l-1), l=1,2,3,4}} (1 - \mathbf{1}_E) \times \mathbf{1}_{\{|\cup_{l=1}^4 \{\mathbf{i}^{(l)}\}| = a_1 + a_2 - 2\}} \\ & \times \mathbb{E} \left\{ \mathbb{M}_{\mathbf{x}, \mathbf{y}, 1}(k, \mathbf{i}^{(l)}, j_{2l-1}, j_{2l} : l = 1, 2, 3, 4) \right\} \\ & \leq C \left\{ \prod_{l=1}^4 c(n, a_l) \right\} \times n^{a_1 + a_2 - 2} \sum_{\mathcal{G}: S_{\mathcal{G}} > 4} \left| \sum_{1 \leq j_1, \dots, j_8 \leq p} \prod_{t=1}^{a+b} \sigma_{j_{g_{2t-1}}, j_{g_{2t}}} \right| \\ & = o(n^{-2}), \end{aligned}$$

where the last equation follows by Condition A.6 (4),  $\sigma^2(a) = \Theta(n^{-a}) \times \sum_{1 \leq j_1, j_2, j_3, j_4 \leq p} (\sigma_{j_1, j_3} \sigma_{j_2, j_4})^a$ , and  $c(n, a) = \Theta(1) \{n^a \sigma(a)\}^{-1}$ . In summary, we obtain  $\mathbb{E}(\mathbb{T}_{k, a_1, a_2}^2) - G_{a_1, a_2, 1} = o(n^{-2})$ .

*B.9.4.2. Part II:  $n_x \leq k \leq n_x + n_y$ .* In this section, we prove that when  $n_x \leq k \leq n_x + n_y$ ,  $\text{var}(\mathbb{T}_{k, a_1, a_2}) = o(n^{-2})$ . Recall the form derived in Section B.9.3.2. We have  $\mathbb{T}_{k, a_1, a_2} = \sum_{L_1 \leq s_1 \leq a_1, L_2 \leq s_2 \leq a_2} \mathbb{T}_{k, a_1, a_2, s_1, s_2}$ , where

$$\begin{aligned} \mathbb{T}_{k, a_1, a_2, s_1, s_2} &= \sum_{\substack{1 \leq j_1, j_2, j_3, j_4 \leq p; \\ \mathbf{i}^{(l)} \in \mathcal{P}(n_x, s_l): l=1,2; \\ \mathbf{w}^{(l)} \in \mathcal{P}(k-n_x-1, a_l-s_l-1): l=1,2}} \prod_{l=1}^2 c_2(n, a_l, s_l) \\ & \times \mathbb{M}_{\mathbf{x}, \mathbf{y}, 2}(k - n_x, \mathbf{i}^{(l)}, j_{2l-1}, j_{2l} : l = 1, 2). \end{aligned}$$

To prove  $\text{var}(\mathbb{T}_{k, a_1, a_2}) = o(n^{-2})$ , it suffices to prove  $\text{var}(\mathbb{T}_{k, a_1, a_2, s_1, s_2}) = o(n^{-2})$ . In particular, for easy presentation, we set  $a_3 = a_1, a_4 = a_2, s_3 = s_1$ , and  $s_4 = s_2$ , and then have

$$\begin{aligned} \{\mathbb{E}(\mathbb{T}_{k, a_1, a_2, s_1, s_2})\}^2 &= \sum_{\substack{1 \leq j_1, j_2, j_3, j_4, j_5, j_6, j_7, j_8 \leq p; \\ \mathbf{i}^{(l)} \in \mathcal{P}(n_x, s_l): l=1,2,3,4; \\ \mathbf{w}^{(l)} \in \mathcal{P}(k-n_x-1, a_l-s_l-1): l=1,2,3,4}} \prod_{l=1}^4 c_2(n, a_l, s_l) \\ & \mathbb{E} \left\{ \mathbb{M}_{\mathbf{x}, \mathbf{y}, 2}(k - n_x, \mathbf{i}^{(l)}, j_{2l-1}, j_{2l} : l = 1, 2) \right\} \\ & \times \mathbb{E} \left\{ \mathbb{M}_{\mathbf{x}, \mathbf{y}, 2}(k - n_x, \mathbf{i}^{(l)}, j_{2l-1}, j_{2l} : l = 3, 4) \right\}. \end{aligned}$$



In addition, we have

$$\begin{aligned} \mathbb{E}(\mathbb{T}_{k,a_1,a_2,s_1,s_2}^2) &= \sum_{\substack{1 \leq j_1, j_2, j_3, j_4, j_5, j_6, j_7, j_8 \leq p; \\ \mathbf{i}^{(l)} \in \mathcal{P}(n_x, s_l): l=1,2,3,4; \\ \mathbf{w}^{(l)} \in \mathcal{P}(k-n_x-1, a_l-s_l-1): l=1,2,3,4}} \prod_{l=1}^4 c_2(n, a_l, s_l) \\ &\quad \times \mathbb{E}\left\{ \mathbb{M}_{\mathbf{x},\mathbf{y},2}(k-n_x, \mathbf{i}^{(l)}, j_{2l-1}, j_{2l} : l=1,2,3,4) \right\}, \end{aligned}$$

where we define

$$\begin{aligned} &\mathbb{M}_{\mathbf{x},\mathbf{y},2}(k-n_x, \mathbf{i}^{(l)}, j_{2l-1}, j_{2l} : l=1,2,3,4) \\ &= \prod_{l=1}^4 \left( \prod_{t=1}^{s_l} \mathcal{X}_{i_t^{(l)}, j_{2l-1}, j_{2l}} \prod_{\tilde{t}=1}^{a_l-s_l-1} \mathcal{Y}_{w_{\tilde{t}}^{(l)}, j_{2l-1}, j_{2l}} \right) \\ &\quad \mathbb{E}(\mathcal{Y}_{k-n_x, j_1, j_2} \mathcal{Y}_{k-n_x, j_3, j_4}) \times \mathbb{E}(\mathcal{Y}_{k-n_x, j_5, j_6} \mathcal{Y}_{k-n_x, j_7, j_8}). \end{aligned}$$

Therefore  $\text{var}(\mathbb{T}_{k,a_1,a_2,s_1,s_2}) = \mathbb{E}(\mathbb{T}_{k,a_1,a_2,s_1,s_2}^2) - \{\mathbb{E}(\mathbb{T}_{k,a_1,a_2,s_1,s_2})\}^2$  is derived. We note that the form of  $\text{var}(\mathbb{T}_{k,a_1,a_2,s_1,s_2})$  is very similar to the  $\text{var}(\mathbb{T}_{k,a_1,a_2})$  in Section B.9.4.1. In particular, we can write  $\mathcal{Z}_{i,j_1,j_2} = \mathcal{X}_{i,j_1,j_2}$  if  $i \leq n_x$  and  $\mathcal{Z}_{i,j_1,j_2} = \mathcal{Y}_{i-n_x,j_1,j_2}$  if  $i > n_x$ . Then we let  $\mathbf{q}^{(l)} = (\mathbf{i}^{(l)}, \tilde{\mathbf{w}}^{(l)})$  to be a joint index tuple of  $\mathbf{i}^{(l)}$  and  $\mathbf{w}^{(l)}$ , where  $\tilde{\mathbf{w}}^{(l)}$  is transformed from  $\mathbf{w}^{(l)}$  by adding each index with  $n_x$ . Also let  $\mathbf{1}_{\tilde{E}}$  be an indicator function of the event that  $(\{\mathbf{q}^{(1)}\} \cup \{\mathbf{q}^{(2)}\}) \cap (\{\mathbf{q}^{(3)}\} \cup \{\mathbf{q}^{(4)}\}) = \emptyset$ . Then define

$$\begin{aligned} G_{a_1,a_2,2} &= \prod_{l=1}^4 c(n, a_l) \sum_{\substack{1 \leq j_1, j_2, j_3, j_4, j_5, j_6, j_7, j_8 \leq p; \\ \mathbf{i}^{(l)} \in \mathcal{P}(n_x, s_l): l=1,2,3,4; \\ \mathbf{w}^{(l)} \in \mathcal{P}(k-n_x-1, a_l-s_l-1): l=1,2,3,4}} \times \mathbf{1}_{\tilde{E}} \\ &\quad \times \mathbb{E}\left\{ \mathbb{M}_{\mathbf{x},\mathbf{y},2}(k, \mathbf{i}^{(l)}, j_{2l-1}, j_{2l} : l=1,2,3,4) \right\}. \end{aligned}$$

Similarly to Section B.9.4.1, we also note that

$$\begin{aligned} &\mathbb{E}\left\{ \mathbb{M}_{\mathbf{x},\mathbf{y},2}(k, \mathbf{i}^{(l)}, j_{2l-1}, j_{2l} : l=1,2,3,4) \right\} \times \mathbf{1}_{\tilde{E}} \\ &= \mathbb{E}\left\{ \mathbb{M}_{\mathbf{x},\mathbf{y},2}(k, \mathbf{i}^{(l)}, j_{2l-1}, j_{2l} : l=1,2) \right\} \\ &\quad \times \mathbb{E}\left\{ \mathbb{M}_{\mathbf{x},\mathbf{y},2}(k, \mathbf{i}^{(l)}, j_{2l-1}, j_{2l} : l=3,4) \right\} \times \mathbf{1}_{\tilde{E}}. \end{aligned}$$

Given Conditions A.5 and A.6, we know that similarly to Section B.9.4.1, we can show  $|\{\mathbb{E}(\mathbb{T}_{k,a_1,a_2,s_1,s_2})\}^2 - G_{a_1,a_2,2}| = o(n^{-2})$  and  $|\mathbb{E}(\mathbb{T}_{k,a_1,a_2,s_1,s_2}^2) - G_{a_1,a_2,2}| = o(n^{-2})$  respectively. Finally we obtain  $\text{var}(\mathbb{T}_{k,a_1,a_2,s_1,s_2}) = o(n^{-2})$ . The proof is very similar and the details is thus skipped.

B.9.5. *Proof of Lemma A.13.4 (on Page 26, Section A.13).* Recall the form of  $D_{n,k}$  derived in Section B.9.3:

$$\sum_{k=1}^n \mathbb{E}(D_{n,k}^4) = \sum_{k=1}^n \sum_{1 \leq r_1, r_2, r_3, r_4 \leq m} \prod_{l=1}^4 t_{r_l} \times \mathbb{E}\left(\prod_{l=1}^4 A_{n,k,a_{r_l}}\right).$$

To prove Lemma A.13.4, it suffices to show that for given  $1 \leq k \leq n$  and  $1 \leq r_1, r_2, r_3, r_4 \leq m$ , we have  $\mathbb{E}(\prod_{l=1}^4 A_{n,k,a_{r_l}}) = o(n^{-1})$ . In addition, by the Cauchy-Schwarz inequality, it suffices to show  $\mathbb{E}(A_{n,k,a}^4) = o(n^{-1})$  for each given finite  $a$ .

B.9.5.1. *Part I:  $1 \leq k \leq n_x$ .* We consider without loss of generality that  $k \geq a$  and

$$\begin{aligned} \mathbb{E}\left(\prod_{l=1}^4 A_{n,k,a}^4\right) &= c^4(n, a) \sum_{\substack{1 \leq j_1, \dots, j_8 \leq p; \\ \mathbf{i}^{(l)} \in \mathcal{P}(k-1, a-1), l=1, \dots, 4}} \mathbb{E}\left(\prod_{l=1}^4 \prod_{t_l=1}^{a-1} \mathcal{X}_{i_{t_l}^{(l)}, j_{2l-1}, j_{2l}}\right) \\ &\quad \times \mathbb{E}\left(\prod_{l=1}^4 \mathcal{X}_{j_{2l-1}, j_{2l}}\right). \end{aligned}$$

As  $\mathbb{E}(\mathcal{X}_{j_1, j_2}) = 0$  under  $H_0$ , we know

$$\mathbb{E}\left(\prod_{l=1}^4 \prod_{t_l=1}^{a-1} \mathcal{X}_{i_{t_l}^{(l)}, j_{2l-1}, j_{2l}}\right) \neq 0$$

only when  $|\cup_{l=1}^4 \{\mathbf{i}^{(l)}\}| \leq 2(a-1)$ . Note that  $c(n, a) = \Theta(1)\{n^a \sigma(a)\}^{-1}$ . To finish the proof, it suffices to show that for given  $(\mathbf{i}^{(1)}, \mathbf{i}^{(2)}, \mathbf{i}^{(3)}, \mathbf{i}^{(4)})$ , we have

$$(B.9.28) \quad \sum_{1 \leq j_1, \dots, j_8 \leq p} \mathbb{E}\left(\prod_{l=1}^4 \prod_{t_l=1}^{a-1} \mathcal{X}_{i_{t_l}^{(l)}, j_{2l-1}, j_{2l}}\right) \mathbb{E}\left(\prod_{l=1}^4 \mathcal{X}_{j_{2l-1}, j_{2l}}\right) = O(n^{2a}) \sigma^4(a).$$

We next prove (B.9.28) under Conditions A.5 and A.6 in the following Sections B.9.5.1.1 and B.9.5.1.2, respectively.

B.9.5.1.1. *Under Condition A.5.* Recall that  $\mathcal{X}_{i, j_1, j_2} = x_{i, j_1} x_{i, j_2} - \sigma_{j_1, j_2}$ . By the symmetricity of the  $j$  indexes, we have

$$\begin{aligned} \sum_{1 \leq j_1, \dots, j_8 \leq p} \left| \mathbb{E}\left(\prod_{l=1}^4 \mathcal{X}_{j_{2l-1}, j_{2l}}\right) \right| &\leq C \sum_{1 \leq j_1, \dots, j_8 \leq p} \left\{ \left| \mathbb{E}\left(\prod_{l=1}^8 x_{1, j_l}\right) \right| \right. \\ &\quad \left. + \left| \mathbb{E}\left(\prod_{l=1}^6 x_{1, j_l}\right) \sigma_{j_7, j_8} \right| + \left| \mathbb{E}\left(\prod_{l=1}^4 x_{1, j_l}\right) \sigma_{j_5, j_6} \sigma_{j_7, j_8} \right| + \left| \prod_{l=1}^4 \sigma_{j_{2l-1}, j_{2l}} \right| \right\}. \end{aligned}$$

Under Condition A.5 with the mixing-type assumption, following similar analysis in Sections B.1.5.2 and B.1.6.2, we know  $\sum_{1 \leq j_1, \dots, j_8 \leq p} |\mathbb{E}(\prod_{l=1}^8 x_{1,j_l})|$ ,  $\sum_{1 \leq j_1, \dots, j_8 \leq p} |\mathbb{E}(\prod_{l=1}^6 x_{1,j_l}) \sigma_{j_7, j_8}|$ ,  $\sum_{1 \leq j_1, \dots, j_8 \leq p} |\mathbb{E}(\prod_{l=1}^4 x_{1,j_l}) \sigma_{j_5, j_6} \sigma_{j_7, j_8}|$  and  $\sum_{1 \leq j_1, \dots, j_8 \leq p} |\prod_{l=1}^4 \sigma_{j_{2l-1}, j_{2l}}|$  are all  $O(p^4)$ . It follows that

$$(B.9.29) \quad \sum_{1 \leq j_1, \dots, j_8 \leq p} \left| \mathbb{E} \left( \prod_{l=1}^4 \mathcal{X}_{j_{2l-1}, j_{2l}} \right) \right| = O(p^4).$$

Recall that Lemma A.13.1 shows that  $\sigma^2(a) = \Theta(p^2 n^{-a})$ . By (B.9.29) and Condition A.5 (2), we have (B.9.28) holds and  $\mathbb{E}(A_{n,k,a}^4) = o(n^{-1})$ .

*B.9.5.1.2. Under Condition A.6.* By Condition A.6 (3), we know that  $\mathbb{E}(\prod_{l=1}^4 \prod_{t_l=1}^{a-1} \mathcal{X}_{i_{t_l}^{(l)}, j_{2l-1}, j_{2l}}) \times \mathbb{E}(\prod_{l=1}^4 \mathcal{X}_{j_{2l-1}, j_{2l}})$  is a linear combination of  $\mathbb{E}(\prod_{t=1}^{4a} \sigma_{j_{g_{2t-1}}, j_{g_{2t}}})$ , where  $\mathcal{G} = (g_1, \dots, g_{8a}) \in \{1, \dots, 8\}^{8a}$  satisfies that  $g_{2t-1} \neq g_{2t}$  for  $t = 1, \dots, 4a$  and the number of  $g$ 's equal to  $m$  is  $a$  for each  $m \in \{1, \dots, 8\}$ . By Condition A.6 (4), for given  $\mathcal{G}$  satisfying the constraints,  $\sum_{1 \leq j_1, \dots, j_8 \leq p} \sigma_{j_{g_{2t-1}}, j_{g_{2t}}} = O(1) \sum_{1 \leq j_1, \dots, j_8 \leq p} (\sigma_{j_1, j_2} \sigma_{j_3, j_4} \sigma_{j_5, j_6} \sigma_{j_7, j_8})^a$ . Then we have

$$\begin{aligned} & \sum_{1 \leq j_1, \dots, j_8 \leq p} \mathbb{E} \left( \prod_{l=1}^4 \prod_{t_l=1}^{a-1} \mathcal{X}_{i_{t_l}^{(l)}, j_{2l-1}, j_{2l}} \right) \times \mathbb{E} \left( \prod_{l=1}^4 \mathcal{X}_{j_{2l-1}, j_{2l}} \right) \\ &= O(1) \sum_{1 \leq j_1, \dots, j_8 \leq p} (\sigma_{j_1, j_2} \sigma_{j_3, j_4} \sigma_{j_5, j_6} \sigma_{j_7, j_8})^a = O(1) \left( \sum_{1 \leq j_1, j_2 \leq p} \sigma_{j_1, j_2}^a \right)^4. \end{aligned}$$

Recall that Lemma A.13.1 shows that  $\sigma^2(a) = \Theta(n^{-a}) (\sum_{1 \leq j_1, j_2 \leq p} \sigma_{j_1, j_2}^a)^2$ . Therefore, (B.9.28) is obtained and Lemma A.13.4 is proved.

*B.9.5.2. Part II:  $n_x + 1 \leq k \leq n_x + n_y$ .* Section B.9.3.2 derives that  $A_{n,k,a} = \sum_{s=L_k}^{a-1} A_{n,k,a,s}$ , where

$$A_{n,k,a,s} = \sum_{\substack{1 \leq j_1, j_2 \leq p; \\ \mathbf{i} \in \mathcal{P}(n_x, s); \\ \mathbf{w} \in \mathcal{P}(k - n_x - 1, a - s - 1)}} c_2(n, a, s) \mathcal{Y}_{k - n_x, j_1, j_2} \prod_{t=1}^s \mathcal{X}_{i_t, j_1, j_2} \prod_{\tilde{t}=1}^{a-s-1} \mathcal{Y}_{w_{\tilde{t}}, j_1, j_2}.$$

Similarly to Section B.9.5.1, it suffices to show that for given finite integers  $a$  and  $s$ ,  $\mathbb{E}(A_{n,k,a,s}^4) = o(n^{-1})$ . Following the arguments in Section B.9.4.2, we know  $A_{n,k,a,s}$  takes a similar form to  $A_{n,k,a}$  in Section B.9.5.1. Therefore the proof in Section B.9.5.1.1 can be applied similarly to show  $\mathbb{E}(A_{n,k,a,s}^4) = o(n^{-1})$  in this section. The proof will be very similar and the details are thus skipped.

### B.10. Lemmas for the proof of Theorem 4.7.

B.10.1. *Proof of Lemma A.14.1 (on Page 28, Section A.14).* In this section, to prove Lemma A.14.1, we study  $\text{var}(T_{D,a,1})$ ,  $\text{var}(T_{D,a,2})$  and  $\text{var}\{\tilde{\mathcal{U}}^*(a)\}$  respectively.

*Part I:*  $\text{var}(T_{D,a,1})$ . We first derive  $\text{var}(T_{D,a,1})$ . Note that  $T_{D,a,1}$  is a summation over  $j$  indexes in  $\mathbb{J}_0$ , and  $\sigma_{x,j_1,j_2} = \sigma_{y,j_1,j_2}$  for  $j_1, j_2 \in \mathbb{J}_0$ . Following the arguments in Section B.9.1, similarly to (B.9.1), we have

$$\text{var}(T_{D,a,1}) \simeq \sum_{1 \leq j_1, j_2, j_3, j_4 \in \mathbb{J}_0} a! (\mathbf{X}_{j_1, j_2, j_3, j_4} / n_x + \mathbf{Y}_{j_1, j_2, j_3, j_4} / n_y)^a.$$

By Condition A.7 (3), (B.9.9) still holds. Then by Condition A.8 and the symmetricity of  $j$  indexes,

$$(B.10.1) \quad \text{var}(T_{D,a,1}) \simeq C_{\kappa,a} \sum_{1 \leq j_1, j_2, j_3, j_4 \in \mathbb{J}_0} a! \sigma_{j_1, j_2}^a \sigma_{j_3, j_4}^a,$$

where  $C_{\kappa,a} = \{(\kappa_x - 1)/n_x + (\kappa_y - 1)/n_y\}^a + 2(\kappa_x/n_x + \kappa_y/n_y)^a$ , and  $\text{var}(T_{D,a,1})$  is of order  $\Theta(n^{-a} \mathbb{V}_{a,a,0,0}^{1/2})$  with  $\mathbb{V}_{a,a,0,0}^{1/2} = \sum_{j_1, \dots, j_4 \in \mathbb{J}_0} (\sigma_{x,j_1,j_2} \sigma_{x,j_3,j_4})^a$  defined on Page 27.

*Part II:*  $\text{var}(T_{D,a,2})$ . We show  $\text{var}(T_{D,a,2}) = o(1)\text{var}(T_{D,a,1})$ . Particularly,

$$T_{D,a,2} = \sum_{(j_1, j_2) \in J_{0,D}} \frac{1}{P_a^{n_x} P_a^{n_y}} \sum_{\substack{\mathbf{i} \in \mathcal{P}(n_x, a), \\ \mathbf{w} \in \mathcal{P}(n_y, a)}} \prod_{t=1}^a (\mathcal{X}_{i_t, j_1, j_2} - \mathcal{Y}_{w_t, j_1, j_2}),$$

where we redefine  $\mathcal{X}_{i,j_1,j_2} = x_{i,j_1} x_{i,j_2} - \sigma_{y,j_1,j_2}$  and  $\mathcal{Y}_{i,j_1,j_2} = y_{i,j_1} y_{i,j_2} - \sigma_{y,j_1,j_2}$ . Moreover, we define

$$G_{D,a} = \sum_{(j_1, j_2), (j_3, j_4) \in J_{0,D}} (P_a^{n_x} P_a^{n_y})^{-2} \sum_{\substack{\mathbf{i}, \tilde{\mathbf{i}} \in \mathcal{P}(n_x, a), \\ \mathbf{w}, \tilde{\mathbf{w}} \in \mathcal{P}(n_y, a)}} \mathbf{1}_{\{\{\mathbf{i}\} \cap \{\tilde{\mathbf{i}}\} = \emptyset\}} (D_{j_1, j_2} D_{j_3, j_4})^a.$$

To prove  $\text{var}(T_{D,a,2}) = \mathbb{E}(T_{D,a,2}^2) - \{\mathbb{E}(T_{D,a,2})\}^2$  is  $o(1)\text{var}(T_{D,a,1})$ , we next show  $|\mathbb{E}(T_{D,a,2}^2) - G_{D,a}|$  and  $|\{\mathbb{E}(T_{D,a,2})\}^2 - G_{D,a}|$  are both  $o(1)\text{var}(T_{D,a,1})$ .

Note that  $\mathbb{E}(\mathcal{X}_{i,j_1,j_2}) = D_{j_1,j_2}$  and  $\mathbb{E}(\mathcal{Y}_{i,j_1,j_2}) = 0$ . We have

$$\{\mathbb{E}(T_{D,a,2})\}^2 = \sum_{(j_1, j_2), (j_3, j_4) \in J_{0,D}} (P_a^{n_x} P_a^{n_y})^{-2} \sum_{\substack{\mathbf{i}, \tilde{\mathbf{i}} \in \mathcal{P}(n_x, a), \\ \mathbf{w}, \tilde{\mathbf{w}} \in \mathcal{P}(n_y, a)}} (D_{j_1, j_2} D_{j_3, j_4})^a.$$

Then

$$\begin{aligned}
& |\{E(T_{D,a,2})\}^2 - G_{D,a}| \\
& \leq \left| \sum_{(j_1,j_2),(j_3,j_4) \in J_{0,D}} (P_a^{n_x} P_a^{n_y})^{-2} \sum_{\substack{\mathbf{i}, \tilde{\mathbf{i}} \in \mathcal{P}(n_x,a), \\ \mathbf{w}, \tilde{\mathbf{w}} \in \mathcal{P}(n_y,a)}} \mathbf{1}_{\{\{\mathbf{i}\} \cap \{\tilde{\mathbf{i}}\} \neq \emptyset\}} (D_{j_1,j_2} D_{j_3,j_4})^a \right| \\
& \leq C n^{-1} \sum_{(j_1,j_2),(j_3,j_4) \in J_{0,D}} |D_{j_1,j_2} D_{j_3,j_4}|^a,
\end{aligned}$$

where we use  $\sum_{\mathbf{i}, \tilde{\mathbf{i}} \in \mathcal{P}(n_x,a), \mathbf{w}, \tilde{\mathbf{w}} \in \mathcal{P}(n_y,a)} \mathbf{1}_{\{\{\mathbf{i}\} \cap \{\tilde{\mathbf{i}}\} \neq \emptyset\}} = O(n^{4a-1})$ . In addition,

$$\begin{aligned}
& |E(T_{D,a,2}^2) - G_{D,a}| \\
& \leq C \sum_{(j_1,j_2),(j_3,j_4) \in J_{0,D}} (P_a^{n_x} P_a^{n_y})^{-2} \sum_{\substack{\mathbf{i}, \tilde{\mathbf{i}} \in \mathcal{P}(n_x,a), \\ \mathbf{w}, \tilde{\mathbf{w}} \in \mathcal{P}(n_y,a)}} \\
& \left( \mathbf{1}_{\{\{\mathbf{i}\} \cap \{\tilde{\mathbf{i}}\} = \emptyset\}} \left| E \left\{ \prod_{t=1}^a (\mathcal{X}_{i_t, j_1, j_2} - \mathcal{Y}_{w_t, j_1, j_2}) (\mathcal{X}_{\tilde{i}_t, j_3, j_4} - \mathcal{Y}_{\tilde{w}_t, j_3, j_4}) \right\} - (D_{j_1, j_2} D_{j_3, j_4})^a \right| \right. \\
& \left. + \mathbf{1}_{\{\{\mathbf{i}\} \cap \{\tilde{\mathbf{i}}\} \neq \emptyset\}} \left| E \left\{ \prod_{t=1}^a (\mathcal{X}_{i_t, j_1, j_2} - \mathcal{Y}_{w_t, j_1, j_2}) (\mathcal{X}_{\tilde{i}_t, j_3, j_4} - \mathcal{Y}_{\tilde{w}_t, j_3, j_4}) \right\} \right| \right).
\end{aligned}$$

We redefine  $\mathbf{X}_{j_1, j_2, j_3, j_4} = E(\mathcal{X}_{i, j_1, j_2} \mathcal{X}_{i, j_3, j_4})$  and  $\mathbf{Y}_{j_1, j_2, j_3, j_4} = E(\mathcal{Y}_{i, j_1, j_2} \mathcal{Y}_{i, j_3, j_4})$ . Then

$$\begin{aligned}
& |E(T_{D,a,2}^2) - G_{D,a}| \\
& \leq C \sum_{1 \leq m_1 + m_2 \leq a} n^{-m_1 - m_2} \\
& \quad \times \sum_{(j_1, j_2), (j_3, j_4) \in J_{0,D}} \left| \mathbf{X}_{j_1, j_2, j_3, j_4}^{m_1} \mathbf{Y}_{j_1, j_2, j_3, j_4}^{m_2} (D_{j_1, j_2} D_{j_3, j_4})^{a - m_1 - m_2} \right|.
\end{aligned}$$

Note that  $\mathbf{Y}_{j_1, j_2, j_3, j_4} = \sigma_{y, j_1, j_3} \sigma_{y, j_2, j_4} + \sigma_{y, j_1, j_4} \sigma_{y, j_2, j_3}$  and  $\sigma_{y, j_1, j_2} = \sigma_{x, j_1, j_2} - D_{j_1, j_2}$ . By Conditions A.7 and A.8, Hölder's inequality, and definitions in (A.14.1), we have

$$\text{var}(T_{D,a,2}) \leq C \max_{\substack{\mathcal{H} \in \mathbb{H}, \\ t=1,2}} \left\{ \sum_{m=1}^a (n^{-a} \mathbb{V}_{a, \mathcal{H}, x, t})^{m/a} (\mathbb{V}_{a, \mathcal{H}, D, 3})^{1-m/a}, n^{-1} \mathbb{V}_{a, \mathcal{H}, D, 3} \right\}.$$

Therefore by Condition A.8 and (B.10.1),  $\text{var}(T_{D,a,2}) = o(1) n^{-a} \mathbb{V}_{a, a, 0, 0}^{1/2} = o(1) \text{var}(T_{D,a,1})$ .

*Part III:*  $\text{var}\{\tilde{\mathcal{U}}^*(a)\}$ . Last, we prove  $\text{var}\{\tilde{\mathcal{U}}^*(a)\} = o(1)\text{var}(T_{D,a,1})$ . Similarly to Section B.9.1, we write  $\tilde{\mathcal{U}}^*(a) = \sum_{c=0}^a \sum_{b_1=0}^c \sum_{b_2=0}^{a-c} C_{a,c,b_1,b_2} \times T_{b_1,b_2,c} \mathbf{1}_{b_1+b_2 \leq a-1}$ , where  $T_{b_1,b_2,c}$  is defined in (B.9.5). For finite  $a$ , to prove  $\text{var}\{\tilde{\mathcal{U}}^*(a)\} = o(1)\text{var}(T_{D,a,1})$ , it suffices to prove  $\text{var}(T_{b_1,b_2,c}) = o(1)\text{var}(T_{D,a,1})$  for  $0 \leq c \leq a$  and  $b_1 + b_2 \leq a - 1$ . As  $\mathbb{E}(\mathcal{Y}_{i,j_1,j_2}) = 0$  and  $\mathbb{E}(\mathbf{x}) = \mathbb{E}(\mathbf{y}) = 0$ , we know that if  $b_1 + b_2 \leq a - 1$ ,  $\mathbb{E}(T_{b_1,b_2,c}) = 0$ . Then  $\text{var}(T_{b_1,b_2,c}) = \mathbb{E}(T_{b_1,b_2,c}^2)$ , which takes a similar form to (B.9.6). Specifically, we can write  $\text{var}(T_{b_1,b_2,c}) = \text{var}(T_{b_1,b_2,c})_{(1)} + \text{var}(T_{b_1,b_2,c})_{(2)}$ , where

$$\begin{aligned} \text{var}(T_{b_1,b_2,c})_{(1)} &= \sum_{j_1, j_2, \tilde{j}_1, \tilde{j}_2 \in \mathbb{J}_0} (P_{2c-b_1}^{n_x} P_{2(a-c)-b_2}^{n_y})^{-2} \sum_{\substack{\mathbf{i}, \tilde{\mathbf{i}} \in \mathcal{P}(n_x, 2c-b_1); \\ \mathbf{w}, \tilde{\mathbf{w}} \in \mathcal{P}(n_y, 2(a-c)-b_2)}} \\ &\quad \mathbb{T}(\mathbf{i}, \tilde{\mathbf{i}}, \mathbf{w}, \tilde{\mathbf{w}}, j_1, j_2, \tilde{j}_1, \tilde{j}_2), \end{aligned}$$

and

$$\begin{aligned} \text{var}(T_{b_1,b_2,c})_{(2)} &= \sum_{\substack{(j_1, j_2), \\ (\tilde{j}_1, \tilde{j}_2) \in J_{0,D}}} (P_{2c-b_1}^{n_x} P_{2(a-c)-b_2}^{n_y})^{-2} \sum_{\substack{\mathbf{i}, \tilde{\mathbf{i}} \in \mathcal{P}(n_x, 2c-b_1); \\ \mathbf{w}, \tilde{\mathbf{w}} \in \mathcal{P}(n_y, 2(a-c)-b_2)}} \\ &\quad \mathbb{T}(\mathbf{i}, \tilde{\mathbf{i}}, \mathbf{w}, \tilde{\mathbf{w}}, j_1, j_2, \tilde{j}_1, \tilde{j}_2), \end{aligned}$$

and  $\mathbb{T}(\mathbf{i}, \tilde{\mathbf{i}}, \mathbf{w}, \tilde{\mathbf{w}}, j_1, j_2, \tilde{j}_1, \tilde{j}_2)$  is defined same as in (B.9.6).

Note that  $\text{var}(T_{b_1,b_2,c})_{(1)}$  is a summation over  $j$  indexes in  $\mathbb{J}_0$ , and  $\sigma_{x,j_1,j_2} = \sigma_{y,j_1,j_2}$  for  $j_1, j_2 \in \mathbb{J}_0$ . Therefore the arguments under  $H_0$  in Section B.9.1 can be applied similarly to  $\text{var}(T_{b_1,b_2,c})_{(1)}$ . Then we have  $\text{var}(T_{b_1,b_2,c})_{(1)} = o(n^{-a})(\sum_{j_1, j_2 \in \mathbb{J}_0} \sigma_{j_1, j_2}^a)^2$  which is  $o(1)\text{var}(T_{D,a,1})$ . We next consider  $\text{var}(T_{b_1,b_2,c})_{(2)}$ . As  $\mathbb{E}(\mathcal{Y}_{i,j_1,j_2}) = 0$  and  $\mathbb{E}(\mathbf{x}) = \mathbb{E}(\mathbf{y}) = 0$ , by the definition in (B.9.6), we know  $\mathbb{E}\{\mathbb{T}(\mathbf{i}, \tilde{\mathbf{i}}, \mathbf{w}, \tilde{\mathbf{w}}, j_1, j_2, \tilde{j}_1, \tilde{j}_2)\} \neq 0$  only when  $\{i_{b_1+1}, \dots, i_{2c-b_1}\} = \{\tilde{i}_{b_1+1}, \dots, \tilde{i}_{2c-b_1}\}$  and  $\{\mathbf{w}\} = \{\tilde{\mathbf{w}}\}$ . Let  $m_0 = b_1 - |\{i_1, \dots, i_{b_1}\} \cap \{\tilde{i}_1, \dots, \tilde{i}_{b_1}\}|$ . By Condition A.7 (3) and Hölder's inequality,

$$\begin{aligned} &\text{var}(T_{b_1,b_2,c})_{(2)} \\ &\leq C n_x^{-(c-b_1)} n_y^{-(a-c-b_2)} \max_{\substack{\mathcal{H} \in \mathbb{H}_0, \\ 0 \leq m_0 \leq b_1}} \left\{ \left( n_y^{-a} \sum_{(j_1, j_2), (j_3, j_4) \in J_{0,D}} |\sigma_{y, j_{h_1}, j_{h_2}} \sigma_{y, j_{h_3}, j_{h_4}}|^a \right)^{\frac{a-c}{a}} \right. \\ &\quad \times \left( n_x^{-a} \sum_{(j_1, j_2), (j_3, j_4) \in J_{0,D}} |\sigma_{x, j_{h_1}, j_{h_2}} \sigma_{x, j_{h_3}, j_{h_4}}|^a \right)^{\frac{c-m_0}{a}} \\ &\quad \left. \times \left( \sum_{(j_1, j_2), (j_3, j_4) \in J_{0,D}} |D_{j_{h_1}, j_{h_2}} D_{j_{h_3}, j_{h_4}}|^a \right)^{\frac{m_0}{a}} \right\} \\ &\leq C n^{-(a-b_1-b_2)} \max_{\mathcal{H} \in \mathbb{H}_0, t=1,2} \{n^{-a} \mathbb{V}_{a, \mathcal{H}, x, t}, \mathbb{V}_{a, \mathcal{H}, D, 3}\}, \end{aligned}$$

where the last inequality uses  $\sigma_{y,j_1,j_2} = \sigma_{x,j_1,j_2} - D_{j_1,j_2}$ . As  $b_1 + b_2 \leq a - 1$ ,  $\text{var}(T_{b_1,b_2,c})_{(2)} \leq Cn^{-1} \max_{\mathcal{H} \in \mathbb{H}_0; t=1,2} \{n^{-a} \nabla_{a,\mathcal{H},x,t}, \nabla_{a,\mathcal{H},D,3}\}$ . By Condition A.8 and (B.10.1), we know  $\text{var}(T_{b_1,b_2,c})_{(2)} = o(1)\text{var}(T_{D,a,1})$ .

**B.11. Proof of Remark 2.4.** In this section, we prove the conclusion in Remark 2.4. To be specific, we prove in the following that under the conditions of Theorem 2.3,

$$(B.11.1) \quad \left| P\left(n(M_n^\dagger)^2 > y_p, \frac{\mathcal{U}(a_1)}{\sigma(a_1)} \leq 2z_1, \dots, \frac{\mathcal{U}(a_m)}{\sigma(a_m)} \leq 2z_m\right) - P\left(n(M_n^\dagger)^2 > y_p\right) \prod_{r=1}^m P\left(\frac{\mathcal{U}(a_r)}{\sigma(a_r)} \leq 2z_r\right) \right| \rightarrow 0.$$

Note that we already know  $M_n/n$  and  $\mathcal{U}(a_r)/\sigma(a_r)$ 's for  $r = 1, \dots, m$  are asymptotically independent by the proof of Lemmas A.3.2 and A.3.3. In this section, the proof idea is that we show the difference between  $n(M_n^\dagger)^2$  and  $M_n/n$  is  $o_p(1)$  and then obtain (B.11.1). To prove that  $n(M_n^\dagger)^2 - M_n/n$  is  $o_p(1)$ , we introduce an intermediate variable  $\tilde{M}_n/n$  defined below, and show that  $\tilde{M}_n/n - n(M_n^\dagger)^2 = o_p(1)$  and  $\tilde{M}_n/n - M_n/n = o_p(1)$  respectively.

Specifically, we define

$$\tilde{M}_n/n = \max_{1 \leq j_1 \neq j_2 \leq p} |n\tilde{\sigma}_{j_1,j_2}^2/\theta_{j_1,j_2}|,$$

where  $\tilde{\sigma}_{j_1,j_2} = \sum_{i=1}^n \{(x_{i,j_1} - \bar{x}_{j_1})(x_{i,j_2} - \bar{x}_{j_2})\}/n$  and  $\theta_{j_1,j_2} = \text{var}\{(x_{i,j_1} - \mu_{j_1})(x_{i,j_2} - \mu_{j_2})\}$ . Moreover, by (A.3.3), we have

$$M_n/n = \max_{1 \leq j_1 \neq j_2 \leq p} |n\tilde{\sigma}_{j_1,j_2}^2/\theta_{j_1,j_2}|,$$

where we use the fact that  $\theta_{j_1,j_2} = \sigma_{j_1,j_1}\sigma_{j_2,j_2}$  by Condition 2.3 and define  $\tilde{\sigma}_{j_1,j_2} = \sum_{i=1}^n \{(x_{i,j_1} - \mu_{j_1})(x_{i,j_2} - \mu_{j_2})\}/n$ . In addition, we have

$$M_n^\dagger = \max_{1 \leq j_1 \neq j_2 \leq p} |\hat{\sigma}_{j_1,j_2}|/(\hat{\theta}_{j_1,j_2})^{1/2},$$

where we let  $\hat{\theta}_{j_1,j_2} = \widehat{\text{var}}(\hat{\sigma}_{j_1,j_2}) = n^{-1} \sum_{i=1}^n \{(x_{i,j_1} - \bar{x}_{j_1})(x_{i,j_2} - \bar{x}_{j_2}) - \hat{\sigma}_{j_1,j_2}\}^2$ . In the following, we will first compare  $\tilde{M}_n/n$  and  $n(M_n^\dagger)^2$ , and then compare  $\tilde{M}_n/n$  and  $M_n/n$ . Also for simplicity, we assume without loss of generality that  $\mu_j = 0$  and  $\sigma_{j,j} = 1$ .

Note that  $n(M_n^\dagger)^2 = \max_{1 \leq j_1 \neq j_2 \leq p} |n\tilde{\sigma}_{j_1,j_2}^2/\hat{\theta}_{j_1,j_2}|$ , which differs from  $\tilde{M}_n/n$  only by replacing  $\theta_{j_1,j_2}$  with  $\hat{\theta}_{j_1,j_2}$ . By the proof of Lemma 3 in [5], we know that for any  $C_2 > 0$ , there exists some constant  $C_1$  such that

$$P\left(\max_{1 \leq j_1 \neq j_2 \leq p} |\hat{\theta}_{j_1,j_2} - \theta_{j_1,j_2}|/\theta_{j_1,j_2} \geq C_1 \sqrt{\log p/n}\right) = O(p^{-C_2}).$$

Under the event  $|\hat{\theta}_{j_1, j_2}/\theta_{j_1, j_2} - 1| \leq C_1 \sqrt{\log p/n}$ , we have

$$\begin{aligned} & |\tilde{M}_n/n - n(M_n^\dagger)^2| \\ &= \left| \max_{1 \leq j_1 \neq j_2 \leq p} n\hat{\sigma}_{j_1, j_2}^2/\theta_{j_1, j_2} - \max_{1 \leq j_1 \neq j_2 \leq p} n\hat{\sigma}_{j_1, j_2}^2/\hat{\theta}_{j_1, j_2} \right| \\ &\leq \max_{1 \leq j_1 \neq j_2 \leq p} |n\hat{\sigma}_{j_1, j_2}^2/\theta_{j_1, j_2}| \times \max_{1 \leq j_1 \neq j_2 \leq p} |1 - \theta_{j_1, j_2}/\hat{\theta}_{j_1, j_2}| \\ &\leq \max_{1 \leq j_1 \neq j_2 \leq p} |n\hat{\sigma}_{j_1, j_2}^2/\theta_{j_1, j_2}| C_1 \sqrt{\log p/n}. \end{aligned}$$

It follows that  $n(M_n^\dagger)^2 = \tilde{M}_n/n\{1 + O(\sqrt{\log p/n})\}$ . Since  $\log p/n \rightarrow 0$ , and  $\tilde{M}_n/n$  has a limit by Theorem 3 in Cai and Jiang [4], then  $|\tilde{M}_n/n - n(M_n^\dagger)^2| = o_p(1)$ .

We next compare  $\tilde{M}_n/n$  and  $M_n/n$ . by Lemma B.0.3,

$$\begin{aligned} & |\tilde{M}_n/n - M_n/n| \\ &\leq C \max_{1 \leq j_1 \neq j_2 \leq p} \left| \sum_{i=1}^n (x_{i, j_1} - \bar{x}_{j_1})(x_{i, j_2} - \bar{x}_{j_2}) - \sum_{i=1}^n x_{i, j_1} x_{i, j_2} \right|^2 / n \\ &\quad + C \sqrt{M_n/n} \max_{1 \leq j_1 \neq j_2 \leq p} \left| \sum_{i=1}^n (x_{i, j_1} - \bar{x}_{j_1})(x_{i, j_2} - \bar{x}_{j_2}) - \sum_{i=1}^n x_{i, j_1} x_{i, j_2} \right| / \sqrt{n} \\ &\leq C \max_{1 \leq j \leq p} n\bar{x}_j^4 + Cn^{1/2} \sqrt{M_n/n} \max_{1 \leq j \leq p} \bar{x}_j^2, \end{aligned}$$

where in the last inequality we use  $\max_{1 \leq j_1 \neq j_2 \leq p} \bar{x}_{j_1} \bar{x}_{j_2} \leq \max_{1 \leq j_1 \neq j_2 \leq p} (\bar{x}_{j_1}^2 + \bar{x}_{j_2}^2)/2 \leq \max_{1 \leq j \leq p} \bar{x}_j^2$ . By Eq. (27) in Lemma 2 of Cai and Liu [3], we know that  $\max_{1 \leq j \leq p} |\bar{x}_j| = O_p(\sqrt{\log p/n})$ . Since we assume  $\log p = o(n^{1/7})$ , and Proposition 6.3 in [4] shows that  $M_n/n$  has a limit, we know  $|\tilde{M}_n/n - M_n/n| = o_p(1)$ .

In summary,  $|M_n/n - n(M_n^\dagger)^2| \leq |M_n/n - \tilde{M}_n/n| + |\tilde{M}_n/n - n(M_n^\dagger)^2| = o_p(1)$ . Since  $|M_n/n - n(M_n^\dagger)^2| = o_p(1)$  and  $M_n/n$  and  $\mathcal{U}(a_r)/\sigma(a_r)$ 's for  $r = 1, \dots, m$  are asymptotically independent, similarly to the proof of Lemma A.3.3, we know (B.11.1) is proved.

**B.12. Proof of Corollary 4.1.** Since the proofs in Sections A.10 and A.12 do not rely on  $\Sigma_x = \Sigma_y$ , the proof of Corollary 4.1 follows from Sections A.10 and A.12 directly. We also obtain  $\text{var}\{\mathcal{U}(a)\}$  under the null and alternative hypotheses by Lemma A.10.1 (on Page 20) and Lemma A.12.1 (on Page A.12.1), respectively.

## APPENDIX C: COMPUTATION & SUPPLEMENTARY SIMULATIONS

### C.1. Computation.



C.1.1. *Formulae for (2.15).* Note that  $\mathcal{U}_l(a) = U_l^{1a}$  by the definitions in (2.16), and for different  $l$ 's, the computation methods of  $U_l^{1a}$ 's are the same. Therefore in the following, for simplicity, we give the formulae of  $U_l^{1a}$  without the subscript  $l$ :

$$\begin{aligned}
U^{1_1} &= V^{(1)}, \\
U^{1_2} &= V^{(1,1)} - V^{(2)}, \\
U^{1_3} &= V^{1_3} - 3V^{(2,1)} + 2V^{(3)}, \\
U^{1_4} &= V^{1_4} - 6V^{(2,1,1)} + 8V^{(3,1)} + 3V^{(2,2)} - 6V^{(4)}, \\
U^{1_5} &= V^{1_5} - 10V^{(2,1_3)} + 20V^{(3,1_2)} + 15V^{(2,2,1)} - 30V^{(4,1)} \\
&\quad - 20V^{(2,3)} + 24V^{(5)}, \\
U^{1_6} &= V^{1_6} - 15V^{(1_4,2)} + 40V^{(3,1_3)} + 45V^{(1,1,2,2)}, \\
&\quad - 90V^{(1,1,4)} - 120V^{(1,2,3)} + 144V^{(1,5)} - 15V^{(2,2,2)} \\
&\quad + 90V^{(2,4)} + 40V^{(3,3)} - 120V^{(6)},
\end{aligned}$$

where  $U^{1a}$  and  $V^{(t_1, \dots, t_k)}$  are defined as in (2.16).

C.1.2. *Computation with unknown mean.* In this section, we provide the details of the computation of  $\mathcal{U}(a)$  when  $E(x_{i,j})$  is unknown. We note that  $\mathcal{U}(a)$  is some linear combination of

$$(C.1.1) \quad \sum_{1 \leq i_1 \neq \dots \neq i_k \leq n} \prod_{t=1}^k x_{i_t, j_1}^{r_{t,1}} x_{i_t, j_2}^{r_{t,2}},$$

where  $a \leq k \leq 2a$ ,  $r_{t,1}, r_{t,2} \geq 0$  and  $r_{t,1} + r_{t,2} \geq 1$ . A direct calculation of (C.1.1) has computational cost  $O(n^k)$ , which is large when  $k$  is large. But following the discussion in Section 2.3, we can similarly reduce the computational cost of (C.1.1) to order  $O(n)$  with an iterative method. In particular, we note that

$$\begin{aligned}
(C.1.2) \quad & \sum_{1 \leq i_1 \neq \dots \neq i_k \leq n} \prod_{t=1}^k x_{i_t, j_1}^{r_{t,1}} x_{i_t, j_2}^{r_{t,2}} \\
&= \left( \sum_{1 \leq i_1 \neq \dots \neq i_{k-1} \leq n} \prod_{t=1}^{k-1} x_{i_t, j_1}^{r_{t,1}} x_{i_t, j_2}^{r_{t,2}} \right) \left( \sum_{i=1}^n x_{i, j_1}^{r_{k,1}} x_{i, j_2}^{r_{k,2}} \right) \\
&\quad - \sum_{m=1}^{k-1} \sum_{1 \leq i_1 \neq \dots \neq i_{k-1} \leq n} \left( \prod_{t=1}^{k-1} x_{i_t, j_1}^{r_{t,1}} x_{i_t, j_2}^{r_{t,2}} \right) x_{i_m, j_1}^{r_{k,1}} x_{i_m, j_2}^{r_{k,2}}.
\end{aligned}$$

Suppose we can compute  $\sum_{1 \leq i_1 \neq \dots \neq i_{k-1} \leq n} \prod_{t=1}^{k-1} x_{i_t, j_1}^{r_{t,1}} x_{i_t, j_2}^{r_{t,2}}$  with cost  $O(n)$  for any  $(r_{t,1}, r_{t,2}), t = 1, \dots, k-1$ . Then by the relationship in (C.1.2), we can obtain (C.1.1) with cost  $O(n)$  iteratively.

We then illustrate the iterative method with some examples. When  $k = 1$ , for any given  $(r_{1,1}, r_{1,2})$ , we know  $\sum_{i=1}^n x_{i, j_1}^{r_{1,1}} x_{i, j_2}^{r_{1,2}}$  can be computed with cost  $O(n)$ . When  $k = 2$ , by (C.1.2), we have  $\sum_{1 \leq i_1 \neq i_2 \leq n} \prod_{t=1}^2 x_{i_t, j_1}^{r_{t,1}} x_{i_t, j_2}^{r_{t,2}} = (\sum_{i=1}^n x_{i, j_1}^{r_{1,1}} x_{i, j_2}^{r_{1,2}})(\sum_{i=1}^n x_{i, j_1}^{r_{2,1}} x_{i, j_2}^{r_{2,2}}) - \sum_{i=1}^n x_{i, j_1}^{r_{1,1}+r_{2,1}} x_{i, j_2}^{r_{1,2}+r_{2,2}}$ , which can be computed with cost  $O(n)$ . For a general  $k$ , suppose for any given  $(r_{t,1}, r_{t,2}), t = 1, \dots, k-1$ , we can compute  $\sum_{1 \leq i_1 \neq \dots \neq i_{k-1} \leq n} \prod_{t=1}^{k-1} x_{i_t, j_1}^{r_{t,1}} x_{i_t, j_2}^{r_{t,2}}$  with cost  $O(n)$ . Then by (C.1.2), we can obtain (C.1.1) with computational cost  $O(n)$ .

Given the iterative method discussed above, we can compute  $\mathcal{U}(a)$  with cost  $O(p^2 n)$ . For example, we can write  $\mathcal{U}(1)$  as

$$\sum_{1 \leq j_1 \neq j_2 \leq p} \left\{ n^{-1} \sum_{i=1}^n x_{i, j_1} x_{i, j_2} - (P_2^n)^{-1} \left( \sum_{i_1=1}^n x_{i_1, j_1} \sum_{i_2=1}^n x_{i_2, j_2} - \sum_{i=1}^n x_{i, j_1} x_{i, j_2} \right) \right\}.$$

For  $a = 2$ , similar analysis holds. Note that

$$\mathcal{U}(2) = \sum_{1 \leq j_1 \neq j_2 \leq p} \left\{ (P_2^n)^{-1} \mathcal{U}_1(2) - 2(P_3^n)^{-1} \mathcal{U}_2(2) + (P_4^n)^{-1} \mathcal{U}_3(2) \right\},$$

where

$$\begin{aligned} \mathcal{U}_1(2) &= \sum_{1 \leq i_1 \neq i_2 \leq n} \prod_{t=1}^2 x_{i_t, j_1} x_{i_t, j_2}, \\ \mathcal{U}_2(2) &= \sum_{1 \leq i_1 \neq i_2 \neq i_3 \leq n} (x_{i_1, j_1} x_{i_1, j_2})(x_{i_2, j_1})(x_{i_3, j_2}), \\ \mathcal{U}_3(2) &= \sum_{1 \leq i_1 \neq i_2 \neq i_3 \neq i_4 \leq n} \prod_{t=1}^2 x_{i_t, j_1} \prod_{t=3}^4 x_{i_t, j_2}. \end{aligned}$$

We then find that  $\mathcal{U}_1(2), \mathcal{U}_2(2)$  and  $\mathcal{U}_3(2)$  can be computed with cost  $O(n)$  using the following formulae.

$$\mathcal{U}_1(2) = \left( \sum_{i=1}^n x_{i, j_1} x_{i, j_2} \right)^2 - \sum_{i=1}^n (x_{i, j_1} x_{i, j_2})^2.$$

$$\begin{aligned} \mathcal{U}_2(2) &= \left( \sum_{i=1}^n x_{i, j_1} x_{i, j_2} \right) \left( \sum_{1 \leq i_1 \neq i_2 \leq n} x_{i_1, j_1} x_{i_2, j_2} \right) \\ &\quad - \sum_{1 \leq i_1 \neq i_2 \leq n} (x_{i_1, j_1}^2 x_{i_1, j_2}) x_{i_2, j_2} - \sum_{1 \leq i_1 \neq i_2 \leq n} (x_{i_1, j_1} x_{i_1, j_2}^2) x_{i_2, j_1}, \end{aligned}$$

where we use  $\sum_{1 \leq i_1 \neq i_2 \leq n} x_{i_1, j_1} x_{i_2, j_2} = (\sum_{i=1}^n x_{i, j_1})(\sum_{i=1}^n x_{i, j_2}) - \sum_{i=1}^n x_{i, j_1} x_{i, j_2}$ ,  
and  $\sum_{1 \leq i_1 \neq i_2 \leq n} (x_{i_1, j_1}^2 x_{i_1, j_2}) x_{i_2, j_2} = (\sum_{i=1}^n x_{i, j_1}^2 x_{i, j_2})(\sum_{i=1}^n x_{i, j_2}) - \sum_{i=1}^n x_{i, j_1}^2 x_{i, j_2}^2$ .

$$\mathcal{U}_3(2) = \left( \sum_{1 \leq i_1 \neq i_2 \leq n} x_{i_1, j_1} x_{i_2, j_1} \right) \left( \sum_{1 \leq i_3 \neq i_4 \leq n} x_{i_3, j_2} x_{i_4, j_2} \right) - 2\mathcal{U}_1(2) - 4\mathcal{U}_3(2),$$

where we use  $\sum_{1 \leq i_1 \neq i_2 \leq n} x_{i_1, k} x_{i_2, k} = (\sum_{i=1}^n x_{i, k})^2 - \sum_{i=1}^n x_{i, k}^2$  for  $k = j_1, j_2$ .

When  $a \geq 3$ , the similar iterative method can be applied. But the closed form for computation might be hard to derive directly. Alternatively, we introduce a simplified form of U-statistics:  $\mathcal{U}_c(a) = (P_a^n)^{-1} \sum_{1 \leq i_1 \neq \dots \neq i_a \leq n} \sum_{1 \leq j_1 \neq j_2 \leq p} \prod_{t=1}^a (x_{i_t, j_1} - \bar{x}_{j_1})(x_{i_t, j_2} - \bar{x}_{j_2})$ . We note that  $\mathcal{U}_c(a)$  takes a similar form to  $\tilde{\mathcal{U}}(a)$  in (2.5), but replacing each observation  $x_{i, j}$  with the centered correspondence  $x_{i, j} - \bar{x}_j$ . Therefore,  $\mathcal{U}_c(a)$  can be computed with cost  $O(n)$  using Algorithm 1, if we set  $s_{i, l} = (x_{i, j_1} - \bar{x}_{j_1})(x_{i, j_2} - \bar{x}_{j_2})$  in Algorithm 1 for  $l \in \{(j_1, j_2) : 1 \leq j_1 \neq j_2 \leq p\}$ . We then show that we can substitute  $\mathcal{U}(a)$  with  $\mathcal{U}_c(a)$  when  $a \geq 3$  in computation under certain conditions.

**PROPOSITION C.1.** *Under the Conditions of Theorem 2.4, consider  $a \geq 3$ . If  $a$  is odd,  $p = o(n^{1+a/2})$ ; if  $a$  is even,  $p = o(n^{a/2})$ . Then  $\{\mathcal{U}(a) - \mathcal{U}_c(a)\}/\sigma(a) \xrightarrow{P} 0$ .*

Proposition C.1 is proved in the following Section C.1.3. It implies that the results in Theorem 2.4 still hold by replacing  $\mathcal{U}(a)$  with  $\mathcal{U}_c(a)$ . As discussed above, we recommend including U-statistics of orders  $\{1, 2, 3, \dots, 6, \infty\}$  in the adaptive testing procedure. Then Proposition C.1 requires that  $p = o(n^2)$ , which suits a wide range of applications. Combining Theorem 2.4 and Proposition C.1, we can conduct the test with quick computation of cost  $O(p^2 n)$ .

On the other hand, we can conduct the test more generally without Condition 2.4 and the requirement  $p = o(n^2)$ . Specifically, we compute  $\tilde{\mathcal{U}}(a)$  in (2.5) with cost  $O(p^2 n)$ . Then  $[\tilde{\mathcal{U}}(a) - E\{\tilde{\mathcal{U}}(a)\}]/\sqrt{\text{var}\{\tilde{\mathcal{U}}(a)\}} \xrightarrow{D} \mathcal{N}(0, 1)$  by Lemma A.2.1 in Supplementary Material and Theorem 2.4. To test  $H_0$  in (2.1), it suffices to estimate  $E\{\tilde{\mathcal{U}}(a)\}$  and  $\text{var}\{\tilde{\mathcal{U}}(a)\}$  with permutation. This may have higher computational cost than the method above due to permutation, but is computationally more efficient than estimating  $p$ -values directly via permutation or bootstrap, especially when evaluating small  $p$ -values.

**C.1.3. Proof of Proposition C.1 (on Page 163).** In this section, we prove Proposition C.1. As both  $\mathcal{U}_c(a)$  and  $\mathcal{U}(a)$  are location invariant in the sense of Proposition 2.1, similarly to the proof of Theorem 2.4, we assume  $E(\mathbf{x}) = \mathbf{0}$  in the proofs in this section.

Let  $\mathcal{U}_{c,1} = \tilde{\mathcal{U}}(a)$  in (2.5), and  $\mathcal{U}_{c,2}(a) = \mathcal{U}_c(a) - \mathcal{U}_{c,1}(a)$ . By the proof of Theorem 2.1, we know  $\{\mathcal{U}(a) - \mathcal{U}_{c,1}(a)\}/\sqrt{\text{var}\{\mathcal{U}(a)\}} \xrightarrow{P} 0$ . To finish the proof of Proposition C.1, it suffices to prove  $\mathcal{U}_{c,2}(a)/\sqrt{\text{var}\{\mathcal{U}(a)\}} \xrightarrow{P} 0$ . By Lemma A.2.1,  $\text{var}\{\mathcal{U}(a)\} = \Theta(p^2 n^{-a})$ . Then it suffices to prove  $E\{\mathcal{U}_{c,2}^2(a)\} = o(p^2 n^{-a})$  by Markov's inequality. To derive  $\mathcal{U}_{c,2}(a)$ , we similarly use the notation in Section B.3. Specifically, given tuple  $\mathbf{i} \in \mathcal{P}(n, a)$ , let  $\mathbf{i}_{(s_1+s_2+s_3)}$  represent a sub-tuple of  $\mathbf{i}$  with length  $s_1 + s_2 + s_3$ , and define  $\mathcal{S}(\mathbf{i}, s_1 + s_2 + s_3)$  to be the collection of sub-tuples of  $\mathbf{i}$  with length  $s_1 + s_2 + s_3$ . Then we write

$$\begin{aligned} & \mathcal{U}_{c,2}(a) \\ = & \sum_{\substack{\mathbf{i} \in \mathcal{P}(n, a); \\ 1 \leq j_1 \neq j_2 \leq p}} \sum_{\substack{0 \leq s_1, s_2 \leq a; \\ 0 \leq s_3 < a}} \sum_{\mathbf{i}_{(s_1+s_2+s_3)} \in \mathcal{S}(\mathbf{i}, s_1+s_2+s_3)} (\bar{x}_{j_1} \bar{x}_{j_2})^{a-s_1-s_2-s_3} \\ & \times \left\{ (-\bar{x}_{j_2})^{s_1} \prod_{t=1}^{s_1} x_{i_t, j_1} \right\} \left\{ (-\bar{x}_{j_1})^{s_2} \prod_{t=s_1+1}^{s_1+s_2} x_{i_t, j_2} \right\} \left\{ \prod_{t=s_1+s_2+1}^{s_1+s_2+s_3} x_{i_t, j_1} x_{i_t, j_2} \right\} \\ = & \sum_{0 \leq s_1, s_2 \leq a; 0 \leq s_3 < a} C_{s_1, s_2, s_3} T_{s_1, s_2, s_3}, \end{aligned}$$

where  $C_{s_1, s_2, s_3}$  are some constants that only depend on  $s_1, s_2, s_3$  and  $a$ , and

$$\begin{aligned} T_{s_1, s_2, s_3} = & \sum_{1 \leq j_1 \neq j_2 \leq p; \mathbf{i} \in \mathcal{P}(n, s_1+s_2+s_3)} \frac{1}{P^{n_{s_1+s_2+s_3}}} \times (\bar{x}_{j_1} \bar{x}_{j_2})^{a-s_1-s_2-s_3} \\ & \times \left\{ (-\bar{x}_{j_2})^{s_1} \prod_{t=1}^{s_1} x_{i_t, j_1} \right\} \left\{ (-\bar{x}_{j_1})^{s_2} \prod_{t=s_1+1}^{s_1+s_2} x_{i_t, j_2} \right\} \left\{ \prod_{t=s_1+s_2+1}^{s_1+s_2+s_3} x_{i_t, j_1} x_{i_t, j_2} \right\}. \end{aligned}$$

When  $a$  is finite, it suffices to prove  $E(T_{s_1, s_2, s_3}^2) = o(p^2 n^{-a})$ .

Particularly,

$$\begin{aligned}
\text{(C.1.3)} \quad & \mathbb{E}(T_{s_1, s_2, s_3}^2) \\
&= \sum_{\substack{1 \leq j_1 \neq j_2 \leq p \\ 1 \leq \tilde{j}_1 \neq \tilde{j}_2 \leq p}} \sum_{\mathbf{i}, \tilde{\mathbf{i}} \in \mathcal{P}(n, s_1 + s_2 + s_3)} \left( \frac{1}{P_{s_1 + s_2 + s_3}^n} \right)^2 \\
&\times \mathbb{E} \left[ (\bar{x}_{j_1} \bar{x}_{j_2})^{a - s_1 - s_2 - s_3} \left\{ (-\bar{x}_{j_2})^{s_1} \prod_{t=1}^{s_1} x_{i_t, j_1} \right\} \left\{ (-\bar{x}_{j_1})^{s_2} \prod_{t=s_1+1}^{s_1+s_2} x_{i_t, j_2} \right\} \right. \\
&\times \left. \left\{ \prod_{t=s_1+s_2+1}^{s_1+s_2+s_3} x_{i_t, j_1} x_{i_t, j_2} \right\} (\bar{x}_{\tilde{j}_1} \bar{x}_{\tilde{j}_2})^{a - s_1 - s_2 - s_3} \left\{ (-\bar{x}_{\tilde{j}_2})^{s_1} \prod_{t=1}^{s_1} x_{i_t, \tilde{j}_1} \right\} \right. \\
&\times \left. \left\{ (-\bar{x}_{\tilde{j}_1})^{s_2} \prod_{t=s_1+1}^{s_1+s_2} x_{i_t, \tilde{j}_2} \right\} \left\{ \prod_{t=s_1+s_2+1}^{s_1+s_2+s_3} x_{i_t, \tilde{j}_1} x_{i_t, \tilde{j}_2} \right\} \right] \\
&= \sum_{\substack{1 \leq j_1 \neq j_2 \leq p \\ 1 \leq \tilde{j}_1 \neq \tilde{j}_2 \leq p}} \sum_{\mathbf{i}, \tilde{\mathbf{i}} \in \mathcal{P}(n, s_1 + s_2 + s_3); \mathbf{w}, \tilde{\mathbf{w}} \in \mathcal{C}(n, 2a - s_1 - s_2 - 2s_3)} C_{n, s_1, s_2, s_3} M(\mathbf{i}, \tilde{\mathbf{i}}, \mathbf{w}, \tilde{\mathbf{w}}, \mathbf{j}),
\end{aligned}$$

where we define on Page 35 that  $\mathbf{w} \in \mathcal{C}(n, s)$  represents tuples  $i_1, \dots, i_s$  satisfying  $1 \leq i_1, \dots, i_s \leq n$ , and  $C_{n, s_1, s_2, s_3} = (P_{s_1 + s_2 + s_3}^n n^{2a - s_1 - s_2 - s_3})^{-2}$  and

$$\begin{aligned}
\text{(C.1.4)} \quad & M(\mathbf{i}, \tilde{\mathbf{i}}, \mathbf{w}, \tilde{\mathbf{w}}, \mathbf{j}) \\
&= \prod_{t=1}^{s_1} x_{i_t, j_1} x_{i_t, \tilde{j}_1} \prod_{t=s_1+1}^{s_1+s_2} x_{i_t, j_2} x_{i_t, \tilde{j}_2} \prod_{t=s_1+s_2+1}^{s_1+s_2+s_3} (x_{i_t, j_1} x_{i_t, j_2}) (x_{i_t, \tilde{j}_1} x_{i_t, \tilde{j}_2}) \\
&\times \prod_{k=1}^{a-s_1-s_3} x_{w_k, j_1} x_{\tilde{w}_k, \tilde{j}_1} \prod_{k=a-s_1-s_3+1}^{2a-s_1-s_2-2s_3} x_{w_k, j_2} x_{\tilde{w}_k, \tilde{j}_2}.
\end{aligned}$$

We write  $M(\mathbf{i}, \tilde{\mathbf{i}}, \mathbf{w}, \tilde{\mathbf{w}}, \mathbf{j}) = M_{j_1} M_{j_2} M_{\tilde{j}_1} M_{\tilde{j}_2}$ , where

$$\begin{aligned}
M_{j_1} &= \prod_{t=1}^{s_1} x_{i_t, j_1} \prod_{t=s_1+s_2+1}^{s_1+s_2+s_3} x_{i_t, j_1} \prod_{k=1}^{a-s_1-s_3} x_{w_k, j_1}, \quad M_{j_2} = \prod_{t=s_1+1}^{s_1+s_2+s_3} x_{i_t, j_2} \prod_{k=a-s_1-s_3+1}^{2a-s_1-s_2-2s_3} x_{w_k, j_2}, \\
M_{\tilde{j}_1} &= \prod_{t=1}^{s_1} x_{i_t, \tilde{j}_1} \prod_{t=s_1+s_2+1}^{s_1+s_2+s_3} x_{i_t, \tilde{j}_1} \prod_{k=1}^{a-s_1-s_3} x_{\tilde{w}_k, \tilde{j}_1}, \quad M_{\tilde{j}_2} = \prod_{t=s_1+1}^{s_1+s_2+s_3} x_{i_t, \tilde{j}_2} \prod_{k=a-s_1-s_3+1}^{2a-s_1-s_2-2s_3} x_{\tilde{w}_k, \tilde{j}_2}.
\end{aligned}$$

As  $\mathbb{E}(\mathbf{x}) = \mathbf{0}$ , when  $a = 1$ ,  $\mathbb{E}(M_{j_1}) = \mathbb{E}(M_{j_2}) = \mathbb{E}(M_{\tilde{j}_1}) = \mathbb{E}(M_{\tilde{j}_2}) = 0$ . We then consider  $a \geq 2$ . As  $\mathbb{E}(\mathbf{x}) = \mathbf{0}$ ,  $i_1 \neq \dots \neq i_{s_1+s_2+s_3}$  and  $\tilde{i}_1 \neq \dots \neq$

$\tilde{i}_{s_1+s_2+s_3}$ , we know that  $E(M_{j_1}) \neq 0$  only when  $\{i_1, \dots, i_{s_1}, i_{s_1+s_2+1}, \dots, i_{s_1+s_2+s_3}\} \subseteq \{w_1, \dots, w_{a-s_1-s_3}\}$  and

$$(C.1.5) \quad |S_{j_1}| \leq s_1 + s_3 + \lfloor (a - 2s_1 - 2s_3)/2 \rfloor = \lfloor a/2 \rfloor,$$

where  $S_{j_1} = \{i_1, \dots, i_{s_1}, i_{s_1+s_2+1}, \dots, i_{s_1+s_2+s_3}, w_1, \dots, w_{a-s_1-s_3}\}$ . Similarly, when  $E(M_{j_2}) \neq 0$ , we know  $\{i_{s_1+1}, \dots, i_{s_1+s_2+s_3}\} \subseteq \{w_{a-s_1-s_3+1}, \dots, w_{2a-s_1-s_2-2s_3}\}$ , and

$$(C.1.6) \quad |S_{j_2}| \leq s_2 + s_3 + \lfloor (a - 2s_2 - 2s_3)/2 \rfloor = \lfloor a/2 \rfloor,$$

where  $S_{j_2} = \{i_{s_1+1}, \dots, i_{s_1+s_2+s_3}, w_{a-s_1-s_3+1}, \dots, w_{2a-s_1-s_2-2s_3}\}$ . As  $|S_{j_1} \cap S_{j_2}| = s_3$ , combining (C.1.5) and (C.1.6), we know that if  $E(M_{j_1}) \neq 0$  and  $E(M_{j_2}) \neq 0$ ,

$$(C.1.7) \quad |S_{j_1} \cup S_{j_2}| \leq 2\lfloor a/2 \rfloor - s_3$$

Similarly, if  $E(M_{\tilde{j}_1}) \neq 0$ , we know

$$(C.1.8) \quad |S_{\tilde{j}_1}| \leq \lfloor a/2 \rfloor,$$

where  $S_{\tilde{j}_1} = \{\tilde{i}_1, \dots, \tilde{i}_{s_1}, \tilde{i}_{s_1+s_2+1}, \dots, \tilde{i}_{s_1+s_2+s_3}, \tilde{w}_1, \dots, \tilde{w}_{a-s_1-s_3}\}$ . If  $E(M_{\tilde{j}_2}) \neq 0$ , we know

$$(C.1.9) \quad |S_{\tilde{j}_2}| \leq \lfloor a/2 \rfloor,$$

where  $S_{\tilde{j}_2} = \{\tilde{i}_{s_1+1}, \dots, \tilde{i}_{s_1+s_2+s_3}, \tilde{w}_{a-s_1-s_3+1}, \dots, \tilde{w}_{2a-s_1-s_2-2s_3}\}$ . If  $E(M_{\tilde{j}_1}) \neq 0$  and  $E(M_{\tilde{j}_2}) \neq 0$ , we know

$$(C.1.10) \quad |S_{\tilde{j}_1} \cup S_{\tilde{j}_2}| \leq 2\lfloor a/2 \rfloor - s_3.$$

To evaluate  $E(T_{s_1, s_2, s_3}^2)$  in (C.1.3), for the simplicity of representation, in the following we write

$$\sum_{\text{ALL SUM}} = \sum_{1 \leq j_1 \neq j_2 \leq p; 1 \leq \tilde{j}_1 \neq \tilde{j}_2 \leq p} \sum_{\mathbf{i}, \tilde{\mathbf{i}} \in \mathcal{P}(n, s_1 + s_2 + s_3); \mathbf{w}, \tilde{\mathbf{w}} \in \mathcal{C}(n, 2a - s_1 - s_2 - 2s_3)}.$$

We next evaluate  $E(T_{s_1, s_2, s_3}^2)$  by discussing the indexes  $\{j_1, j_2, \tilde{j}_1, \tilde{j}_2\}$ . We first consider  $|\{j_1, j_2, \tilde{j}_1, \tilde{j}_2\}| = 4$ , and the summation

$$\sum_{\text{ALL SUM}} \mathbf{1}_{\{|\{j_1, j_2, \tilde{j}_1, \tilde{j}_2\}|=4\}} \times C_{n, s_1, s_2, s_3} \times E\{M(\mathbf{i}, \tilde{\mathbf{i}}, \mathbf{w}, \tilde{\mathbf{w}}, \mathbf{j})\}.$$

Note that  $|\{j_1, j_2, \tilde{j}_1, \tilde{j}_2\}| = 4$  implies that  $j_1 \neq j_2 \neq \tilde{j}_1 \neq \tilde{j}_2$ . Without loss of generality, we assume  $j_1 < j_2 < \tilde{j}_1 < \tilde{j}_2$ , while the other cases can follow similar analysis. Define  $\kappa_1 = j_2 - j_1$ ,  $\kappa_2 = \tilde{j}_1 - j_2$  and  $\kappa_3 = \tilde{j}_2 - \tilde{j}_1$ . In addition, for some small positive constants  $\mu$  and  $\epsilon$  and  $\delta$  in Condition 2.2, define  $K_0 = -(2 + \epsilon)(4 + \mu)(\log p)/(\epsilon \log \delta)$ . If  $\kappa_m = \max\{\kappa_1, \kappa_2, \kappa_3\} \geq K_0$ , we can write

$$|\mathbb{E}\{M(\mathbf{i}, \tilde{\mathbf{i}}, \mathbf{w}, \tilde{\mathbf{w}}, \mathbf{j})\}| \leq C\delta^{K_0\epsilon/(2+\epsilon)} + \Delta_{j, \tilde{j}}.$$

We next evaluate  $\Delta_{j, \tilde{j}}$  by discussing the following cases (a)–(c).

**Case (a)** If all three  $\kappa_1, \kappa_2, \kappa_3 > K_0$ , we have

$$\Delta_{j, \tilde{j}} = |\mathbb{E}(M_{j_1})\mathbb{E}(M_{j_2})\mathbb{E}(M_{\tilde{j}_1})\mathbb{E}(M_{\tilde{j}_2})|.$$

Then if  $\Delta_{j, \tilde{j}} \neq 0$ , we know  $\mathbb{E}(M_{j_1}), \mathbb{E}(M_{j_2}), \mathbb{E}(M_{\tilde{j}_1})$  and  $\mathbb{E}(M_{\tilde{j}_2}) \neq 0$ , which implies that (C.1.7) and (C.1.10) hold. By Condition 2.4, we know that

$$\sum_{\text{ALL SUM}} \Delta_{j, \tilde{j}} \mathbf{1}_{\{|\{j_1, j_2, \tilde{j}_1, \tilde{j}_2\}|=4, \kappa_1, \kappa_2, \kappa_3 > K_0\}} = O(1)p^4 n^{4\lfloor a/2 \rfloor - 2s_3}.$$

In addition,  $\mathbb{E}\{M(\mathbf{i}, \tilde{\mathbf{i}}, \mathbf{w}, \tilde{\mathbf{w}}, \mathbf{j})\} \neq 0$  only if  $|\{\mathbf{i}\} \cup \{\tilde{\mathbf{i}}\} \cup \{\mathbf{w}\} \cup \{\tilde{\mathbf{w}}\}| \leq 2a - s_3$ . It follows that

$$\begin{aligned} \text{(C.1.11)} \quad & \left| \sum_{\text{ALL SUM}} C_{n, s_1, s_2, s_3} \mathbb{E}\{M(\mathbf{i}, \tilde{\mathbf{i}}, \mathbf{w}, \tilde{\mathbf{w}}, \mathbf{j})\} \mathbf{1}_{\left\{ \begin{array}{l} |\{j_1, j_2, \tilde{j}_1, \tilde{j}_2\}|=4; \\ \kappa_1, \kappa_2, \kappa_3 > K_0 \end{array} \right\}} \right| \\ & \leq C \sum_{s_3=0}^{a-1} n^{-2(2a-s_3)} n^{2a-s_3} p^4 C \delta^{K_0\epsilon/(2+\epsilon)} \\ & \quad + \sum_{\text{ALL SUM}} C n^{-2(2a-s_3)} \Delta_{j, \tilde{j}} \mathbf{1}_{\{|\{j_1, j_2, \tilde{j}_1, \tilde{j}_2\}|=4, \kappa_1, \kappa_2, \kappa_3 > K_0\}}, \\ & = o(n^{-(a+1)}) + O(1)p^4 n^{4\lfloor a/2 \rfloor - 4a}, \end{aligned}$$

where we use  $\sum_{\text{ALL SUM}} \mathbf{1}_{\{\mathbb{E}\{M(\mathbf{i}, \tilde{\mathbf{i}}, \mathbf{w}, \tilde{\mathbf{w}}, \mathbf{j})\} \neq 0\}} = \sum_{s_3=0}^{a-1} n^{2a-s_3} p^4$ ,  $\delta^{K_0\epsilon/(2+\epsilon)} = O(1)p^{-(4+\mu)}$ , and  $C_{n, a, s_1, s_2, s_3} = \Theta(1)n^{-2(2a-s_3)}$ . If  $a$  is even, (C.1.11) =  $O(1)p^4 n^{-2a} = o(1)p^2 n^{-a}$ . If  $a$  is odd, (C.1.11) =  $O(1)p^4 n^{-2a-2} = o(1)p^2 n^{-a}$ .

**Case (b.1)** If  $\kappa_1 \leq K_0$ ,  $\kappa_2 > K_0$  and  $\kappa_3 > K_0$ ,

$$\Delta_{j, \tilde{j}} = |\mathbb{E}(M_{j_1} M_{j_2})\mathbb{E}(M_{\tilde{j}_1})\mathbb{E}(M_{\tilde{j}_2})|$$

If  $E(M_{\tilde{j}_1})$  and  $E(M_{\tilde{j}_2}) \neq 0$ , we know (C.1.10) holds. We then consider  $E(M_{j_1}M_{j_2})$  with  $j_1 \neq j_2$ . Note that

$$\begin{aligned} & M_{j_1}M_{j_2} \\ &= \prod_{t=1}^{s_1} x_{i_t, j_1} \prod_{t=s_1+1}^{s_1+s_2} x_{i_t, j_2} \prod_{t=s_1+s_2+1}^{s_1+s_2+s_3} (x_{i_t, j_1} x_{i_t, j_2}) \prod_{k=1}^{a-s_1-s_3} x_{w_k, j_1} \prod_{k=a-s_1-s_3+1}^{2a-s_1-s_2-2s_3} x_{w_k, j_2}. \end{aligned}$$

As  $E(\mathbf{x}) = \mathbf{0}$  and  $E(x_{1, j_1} x_{1, j_2}) = 0$  under  $H_0$  when  $j_1 \neq j_2$ , we know  $E(M_{j_1}M_{j_2}) \neq 0$  only when  $\{i_1, \dots, i_{s_1+s_2+s_3}\} \subseteq \{w_1, \dots, w_{2a-s_1-s_2-2s_3}\}$  and

$$(C.1.12) \quad |S_{j_1} \cup S_{j_2}| \leq \lfloor (2a - s_3)/2 \rfloor$$

We then know  $\Delta_{j, \tilde{j}} \neq 0$  only when (C.1.10) and (C.1.12) hold, and thus

$$\begin{aligned} & \sum_{\text{ALL SUM}} \Delta_{j, \tilde{j}} \times \mathbf{1}_{\{|\{j_1, j_2, \tilde{j}_1, \tilde{j}_2\}|=4, \kappa_1 \leq K_0, \kappa_2, \kappa_3 > K_0\}} \\ &= \sum_{s_3=0}^{a-1} O(1)p^3 K_0 n^{2\lfloor a/2 \rfloor - s_3 + \lfloor (2a-s_3)/2 \rfloor}. \end{aligned}$$

Then similarly to (C.1.11), we have

$$\begin{aligned} (C.1.13) \quad & \left| \sum_{\text{ALL SUM}} C_{n, a, s_1, s_2, s_3} E\{M(\mathbf{i}, \tilde{\mathbf{i}}, \mathbf{w}, \tilde{\mathbf{w}}, \mathbf{j})\} \mathbf{1}_{\left\{ \begin{array}{l} |\{j_1, j_2, \tilde{j}_1, \tilde{j}_2\}|=4; \\ \kappa_1 \leq K_0; \kappa_2, \kappa_3 > K_0 \end{array} \right\}} \right| \\ & \leq o(n^{-(a+1)}) + \sum_{\text{ALL SUM}} C_{n, a, s_1, s_2, s_3} \Delta_{j, \tilde{j}} \mathbf{1}_{\left\{ \begin{array}{l} |\{j_1, j_2, \tilde{j}_1, \tilde{j}_2\}|=4; \\ \kappa_1 \leq K_0; \kappa_2, \kappa_3 > K_0 \end{array} \right\}} \\ & = o(n^{-(a+1)}) + \sum_{s_3=0}^{a-1} O(1)p^3 K_0 n^{2\lfloor a/2 \rfloor - s_3 + \lfloor (2a-s_3)/2 \rfloor - 4a + 2s_3}. \end{aligned}$$

If  $a$  is even, we use  $2\lfloor a/2 \rfloor - s_3 + \lfloor (2a - s_3)/2 \rfloor - 4a + 2s_3 \leq -2a + s_3/2 \leq -a - (a+1)/2$  as  $s_3 \leq a-1$ . Then (C.1.13) =  $O(1)p^3 K_0 n^{-a-(a+1)/2} = o(1)p^2 n^{-a}$ . If  $a$  is odd, we use  $2\lfloor a/2 \rfloor - s_3 + \lfloor (2a - s_3)/2 \rfloor - 4a + 2s_3 \leq -2a + s_3/2 \leq -a - (a+3)/2$  as  $2\lfloor a/2 \rfloor = a-1$  and  $s_3 \leq a-1$ . Then (C.1.13) =  $O(1)p^3 K_0 n^{-a-(a+3)/2} = o(1)p^2 n^{-a}$ .

**Case (b.2)** If  $\kappa_1 > K_0$ ,  $\kappa_2 > K_0$  and  $\kappa_3 \leq K_0$ , similarly to Case (b.1), by symmetricity, we know

$$\begin{aligned} (C.1.14) \quad & \left| \sum_{\text{ALL SUM}} C_{n, a, s_1, s_2, s_3} E\{M(\mathbf{i}, \tilde{\mathbf{i}}, \mathbf{w}, \tilde{\mathbf{w}}, \mathbf{j})\} \mathbf{1}_{\left\{ \begin{array}{l} |\{j_1, j_2, \tilde{j}_1, \tilde{j}_2\}|=4; \\ \kappa_1, \kappa_2 > K_0; \kappa_3 \leq K_0 \end{array} \right\}} \right| \\ & = o(n^{-(a+1)}) + \sum_{s_3=0}^{a-1} O(1)p^3 K_0 n^{2\lfloor a/2 \rfloor - s_3 + \lfloor (2a-s_3)/2 \rfloor - 4a + 2s_3}. \end{aligned}$$



Then (C.1.16) =  $o(1)p^2n^{-a}$ .

**Case (b.3)** If  $\kappa_1 > K_0$ ,  $\kappa_2 \leq K_0$  and  $\kappa_3 > K_0$ ,

$$\Delta_{j,\tilde{j}} = |\mathbf{E}(M_{j_1})\mathbf{E}(M_{j_2}M_{\tilde{j}_1})\mathbf{E}(M_{\tilde{j}_2})|.$$

If  $\mathbf{E}(M_{j_1}), \mathbf{E}(M_{\tilde{j}_2}) \neq 0$ , we know (C.1.5) and (C.1.8) hold. We then consider  $\mathbf{E}(M_{j_2}M_{\tilde{j}_1})$ . Note that

$$\begin{aligned} & M_{j_2}M_{\tilde{j}_1} \\ &= \prod_{t=s_1+1}^{s_1+s_2+s_3} x_{i_t, j_2} \prod_{t=a-s_1-s_3+1}^{2a-s_1-s_2-2s_3} x_{w_t, j_2} \prod_{t=1}^{s_1} x_{i_t, \tilde{j}_1} \prod_{t=s_1+s_2+1}^{s_1+s_2+s_3} x_{i_t, \tilde{j}_1} \prod_{t=1}^{a-s_1-s_3} x_{\tilde{w}_t, \tilde{j}_1}. \end{aligned}$$

If  $\mathbf{E}(M_{j_2}M_{\tilde{j}_1}) \neq 0$ , we know that  $|S_{j_2} \cup S_{\tilde{j}_1}| \leq a$ . As  $|(S_{j_2} \cup S_{\tilde{j}_1}) \cap (S_{j_1} \cup S_{\tilde{j}_2})| = 2s_3$ , we have  $|S_{j_1} \cup S_{j_2} \cup S_{\tilde{j}_1} \cup S_{\tilde{j}_2}| \leq a + 2\lfloor a/2 \rfloor - 2s_3$ . We then know

$$\sum_{\text{ALL SUM}} \Delta_{j,\tilde{j}} \mathbf{1}_{\{|\{j_1, j_2, \tilde{j}_1, \tilde{j}_2\}|=4, \kappa_1, \kappa_3 > K_0, \kappa_2 \leq K_0\}} = \sum_{s_3=0}^{a-1} O(1)p^3 K_0 n^{a+2\lfloor a/2 \rfloor - 2s_3}.$$

Then similarly to (C.1.13), we have

$$\begin{aligned} \text{(C.1.15)} \quad & \left| \sum_{\text{ALL SUM}} C_{n,a,s_1,s_2,s_3} \mathbf{E}\{M(\mathbf{i}, \tilde{\mathbf{i}}, \mathbf{w}, \tilde{\mathbf{w}}, \mathbf{j})\} \mathbf{1}_{\left\{ \begin{array}{l} |\{j_1, j_2, \tilde{j}_1, \tilde{j}_2\}|=4; \\ \kappa_1, \kappa_3 > K_0; \kappa_2 \leq K_0 \end{array} \right\}} \right| \\ &= o(n^{-(a+1)}) + O(1)p^3 K_0 n^{2\lfloor a/2 \rfloor - 3a}. \end{aligned}$$

If  $a$  is even, we know (C.1.15) =  $p^3 K_0 n^{-2a} = o(1)p^2 n^{-a}$ . If  $a$  is odd, we know (C.1.15) =  $p^3 K_0 n^{-2a-1} = o(1)p^2 n^{-a}$ .

**Case (c)** If two of  $\kappa_1, \kappa_2, \kappa_3 \leq K_0$ , we know

$$\sum_{j_1, j_2, \tilde{j}_1, \tilde{j}_2} \mathbf{1}_{\{\text{two of } \kappa_1, \kappa_2, \kappa_3 \leq K_0\}} = O(p^2 K_0^2).$$

Following definition in (C.1.4), we know  $\mathbf{E}\{M(\mathbf{i}, \tilde{\mathbf{i}}, \mathbf{w}, \tilde{\mathbf{w}}, \mathbf{j})\} \neq 0$  only when  $|S_{j_1} \cup S_{j_2} \cup S_{\tilde{j}_1} \cup S_{\tilde{j}_2}| \leq 2a - s_3$ . It implies that

$$\sum_{\text{ALL SUM}} \Delta_{j,\tilde{j}} \mathbf{1}_{\{|\{j_1, j_2, \tilde{j}_1, \tilde{j}_2\}|=4, \text{ two of } \kappa_1, \kappa_2, \kappa_3 \leq K_0\}} = O(1)p^2 K_0^2 n^{2a-s_3}.$$

Similarly to (C.1.15), we have

$$(C.1.16) \quad \left| \sum_{\text{ALL SUM}} C_{n,a,s_1,s_2,s_3} E\{M(\mathbf{i}, \tilde{\mathbf{i}}, \mathbf{w}, \tilde{\mathbf{w}}, \mathbf{j})\} \mathbf{1}_{\left\{ \begin{array}{l} |\{j_1, j_2, \tilde{j}_1, \tilde{j}_2\}|=4; \\ \text{two of } \kappa_1, \kappa_2, \kappa_3 \leq K_0 \end{array} \right\}} \right| \\ = o(n^{-(a+1)}) + \sum_{s_3=0}^{a-1} O(1)p^2 K_0^2 n^{-2a+s_3}.$$

As  $s_3 \leq a - 1$  and  $K_0 = O(\log p)$ , we know (C.1.16) =  $O(1)p^2 K_0^2 n^{-a-1} = o(1)p^2 n^{-a}$ .

**Case (d)** If  $|\{j_1, j_2, j_3, j_4\}| = 3$  or  $2$ , similar analysis can be applied, and we know that

$$(C.1.17) \quad \left| \sum_{\text{ALL SUM}} C_{n,a,s_1,s_2,s_3} E\{M(\mathbf{i}, \tilde{\mathbf{i}}, \mathbf{w}, \tilde{\mathbf{w}}, \mathbf{j})\} \mathbf{1}_{\{|\{j_1, j_2, \tilde{j}_1, \tilde{j}_2\}|=2 \text{ or } 3\}} \right| \\ = o(n^{-(a+1)}) + o(1)p^2 n^{-2a}.$$

Summarizing Cases (a)–(d) above, we obtain  $E(T_{s_1, s_2, s_3}^2) = o(p^2 n^{-a})$ .

**C.2. Simulations on One-Sample Covariance Testing.** In this section, we provide extensive simulation studies for the one-sample covariance testing discussed in Section 2. We present the results of the five simulation settings introduced in Section 3.1 in the following Sections C.2.1–C.2.5.

**C.2.1. Study 1: Empirical Size.** In this study, we verify the theoretical results under  $H_0$  in Section 2 and the show validity of the adaptive testing procedure across different  $n$  and  $p$  values. In particular, we fix  $n = 100$  and take  $p \in \{50, 100, 200, 400, 600, 800, 1000\}$ . Then we generate  $n$  i.i.d.  $p$ -dimensional  $\mathbf{x}_i$  for  $i = 1, \dots, n$ , and each  $\mathbf{x}_i$  has i.i.d. entries of  $\mathcal{N}(0, 1)$  and Gamma(2, 0.5) respectively. The results are summarized in the following Tables S1 and S2 respectively.

In Tables S1 and S2, we provide the simulation results of all the single U-statistics with orders in  $\{1, \dots, 6\}$ . For  $\mathcal{U}(\infty)$ , we first use the test statistic (2.8) same as in Jiang [18], which is denoted as “ $\mathcal{U}(\infty)$  1” below. Since the convergence in [18] is slow, we use permutation to approximate the distribution in the simulations. We also use the standardized version  $M_n^\dagger$  given in Remark 2.4, which is denoted as “ $\mathcal{U}(\infty)$  2” below. Given “ $\mathcal{U}(\infty)$  1” and “ $\mathcal{U}(\infty)$  2”, we apply the adaptive testing with minimum combination and Fisher’s method respectively. The results are denoted as “adpUmin1”, “adpUf1”, “adpUmin2” and “adpUf2” respectively below. In addition, we also compare several methods in the literature. The identity and sphericity

TABLE S1  
*Empirical Type I errors under Gaussian distribution; n = 100.*

| $p$                     | 50    | 100   | 200   | 400   | 600   | 800   | 1000  |
|-------------------------|-------|-------|-------|-------|-------|-------|-------|
| $\mathcal{U}(1)$        | 0.054 | 0.055 | 0.045 | 0.053 | 0.048 | 0.052 | 0.036 |
| $\mathcal{U}(2)$        | 0.058 | 0.058 | 0.066 | 0.050 | 0.071 | 0.048 | 0.063 |
| $\mathcal{U}(3)$        | 0.057 | 0.066 | 0.061 | 0.055 | 0.051 | 0.063 | 0.052 |
| $\mathcal{U}(4)$        | 0.054 | 0.067 | 0.052 | 0.080 | 0.053 | 0.041 | 0.056 |
| $\mathcal{U}(5)$        | 0.049 | 0.054 | 0.059 | 0.070 | 0.045 | 0.049 | 0.053 |
| $\mathcal{U}(6)$        | 0.039 | 0.057 | 0.063 | 0.061 | 0.056 | 0.057 | 0.074 |
| $\mathcal{U}(\infty) 1$ | 0.046 | 0.055 | 0.049 | 0.067 | 0.064 | 0.042 | 0.044 |
| $\mathcal{U}(\infty) 2$ | 0.040 | 0.047 | 0.045 | 0.056 | 0.048 | 0.050 | 0.048 |
| adpUmin 1               | 0.056 | 0.066 | 0.067 | 0.064 | 0.067 | 0.056 | 0.051 |
| adpUf 1                 | 0.065 | 0.083 | 0.069 | 0.079 | 0.063 | 0.058 | 0.060 |
| adpUmin 2               | 0.054 | 0.069 | 0.065 | 0.060 | 0.062 | 0.055 | 0.057 |
| adpUf 2                 | 0.069 | 0.082 | 0.065 | 0.065 | 0.058 | 0.057 | 0.062 |
| Identity                | 0.055 | 0.053 | 0.058 | 0.053 | 0.061 | 0.049 | 0.053 |
| Sphericity              | 0.053 | 0.050 | 0.058 | 0.053 | 0.062 | 0.049 | 0.054 |
| LW                      | 0.058 | 0.051 | 0.053 | 0.045 | 0.067 | 0.048 | 0.058 |
| Schott                  | 0.052 | 0.055 | 0.050 | 0.052 | 0.050 | 0.044 | 0.051 |

TABLE S2  
*Empirical Type I errors under Gamma distribution; n = 100.*

| $p$                     | 50    | 100   | 200   | 400   | 600   | 800   | 1000  |
|-------------------------|-------|-------|-------|-------|-------|-------|-------|
| $\mathcal{U}(1)$        | 0.043 | 0.049 | 0.054 | 0.048 | 0.050 | 0.049 | 0.043 |
| $\mathcal{U}(2)$        | 0.057 | 0.075 | 0.062 | 0.054 | 0.057 | 0.055 | 0.061 |
| $\mathcal{U}(3)$        | 0.054 | 0.064 | 0.050 | 0.041 | 0.057 | 0.051 | 0.056 |
| $\mathcal{U}(4)$        | 0.047 | 0.056 | 0.061 | 0.056 | 0.052 | 0.053 | 0.045 |
| $\mathcal{U}(5)$        | 0.043 | 0.043 | 0.054 | 0.052 | 0.050 | 0.053 | 0.049 |
| $\mathcal{U}(6)$        | 0.032 | 0.035 | 0.059 | 0.045 | 0.046 | 0.053 | 0.044 |
| $\mathcal{U}(\infty) 1$ | 0.052 | 0.045 | 0.048 | 0.053 | 0.045 | 0.049 | 0.055 |
| $\mathcal{U}(\infty) 2$ | 0.044 | 0.052 | 0.052 | 0.053 | 0.044 | 0.051 | 0.045 |
| adpUmin 1               | 0.051 | 0.054 | 0.069 | 0.062 | 0.049 | 0.058 | 0.065 |
| adpUf 1                 | 0.055 | 0.060 | 0.075 | 0.067 | 0.054 | 0.058 | 0.067 |
| adpUmin 2               | 0.049 | 0.055 | 0.068 | 0.063 | 0.049 | 0.059 | 0.066 |
| adpUf 2                 | 0.063 | 0.067 | 0.070 | 0.058 | 0.047 | 0.057 | 0.061 |
| Identity                | 1.000 | 1.000 | 1.000 | 1.000 | 1.000 | 1.000 | 1.000 |
| Sphericity              | 0.088 | 0.065 | 0.071 | 0.056 | 0.060 | 0.059 | 0.050 |
| LW                      | 1.000 | 1.000 | 1.000 | 1.000 | 1.000 | 1.000 | 1.000 |
| Schott                  | 0.051 | 0.063 | 0.053 | 0.053 | 0.055 | 0.046 | 0.060 |

tests in Chen et al. [8] are denoted as “Equal” and “Spher” below; the methods in Ledoit and Wolf [21] and Schott [24], which are referred to as “LW” and “Schott” respectively.

C.2.2. *Study 2.* In this section, we provide the simulation results for the second setting in Section 3. In particular, we generate  $n$  i.i.d.  $p$ -dimensional  $\mathbf{x}_i$  for  $i = 1, \dots, n$ , and  $\mathbf{x}_i$  follows multivariate Gaussian distribution with mean zero and covariance  $\Sigma_A = (1 - \rho)I_p + \rho\mathbf{1}_{p,k_0}\mathbf{1}_{p,k_0}^\top$ .

Similarly to Figure 2, we conduct simulations on the adaptive procedure with U-statistics of orders in  $\{1, \dots, 6, \infty\}$ . We provide the simulation results of all the single U-statistics and the adaptive procedure, and also compare with some other methods in the literature. We take  $(n, p) \in \{(100, 300), (100, 600), (100, 1000)\}$ , and provide the results in the following Figures S1–S3 respectively.

In Figure S1, the first 7 plots are simulated with  $k_0 \in \{2, 5, 7, 10, 13, 20, 50\}$ . Particularly, we include results of  $\mathcal{U}(a)$  for  $a \in \{1, \dots, 6, \infty\}$ ; the adaptive procedure “adpU” by minimum combination of these single U-statistics; identity and sphericity tests in [8], which are denoted as “Equal” and “Sh-per”, respectively. We can see that when  $k_0 \in \{7, 10, 13\}$ , the results of “adpU” are better than all the other test statistics. For other cases, the results of “adpU” are close to the best results of single U-statistics. In addition, we also examine the case when the nonzero off-diagonal elements of  $\Sigma_A$ , i.e.,  $\sigma_{j_1, j_2}$  with  $1 \leq j_1 \neq j_2 \leq k_0$ , have same absolute value  $|\rho|$ , but can be positive or negative with equal probability. The results of powers versus different  $|\rho|$  values are given by 8th plot in Figure S1, which is consistent with Remark 2.6 in Section 2.2.

In Figures S2 and S3, the meanings of the legends are the same as in Tables S1 and S2, and are already explained in Section C.2.1. We can find similar patterns to that in Figure S1.

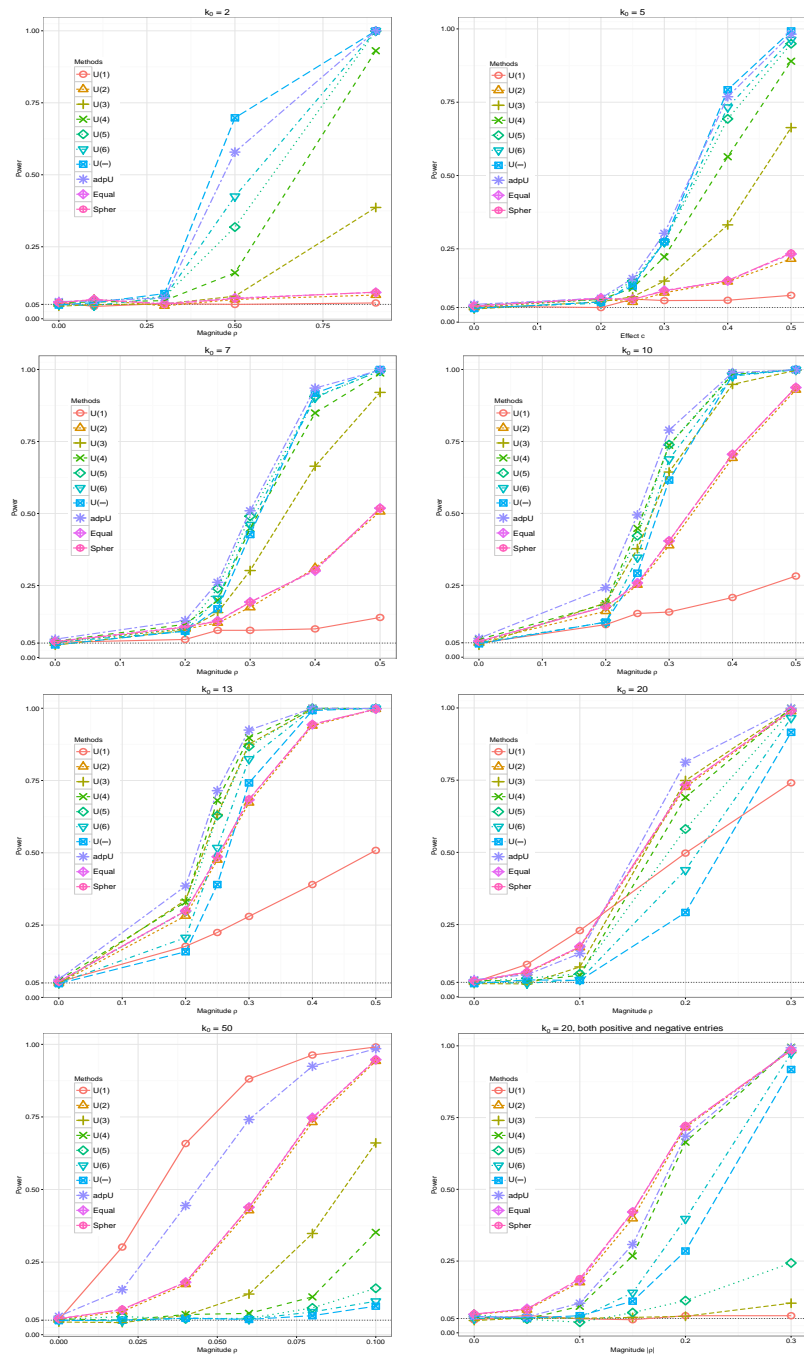Fig S1: Study 2:  $n = 100, p = 300$ .

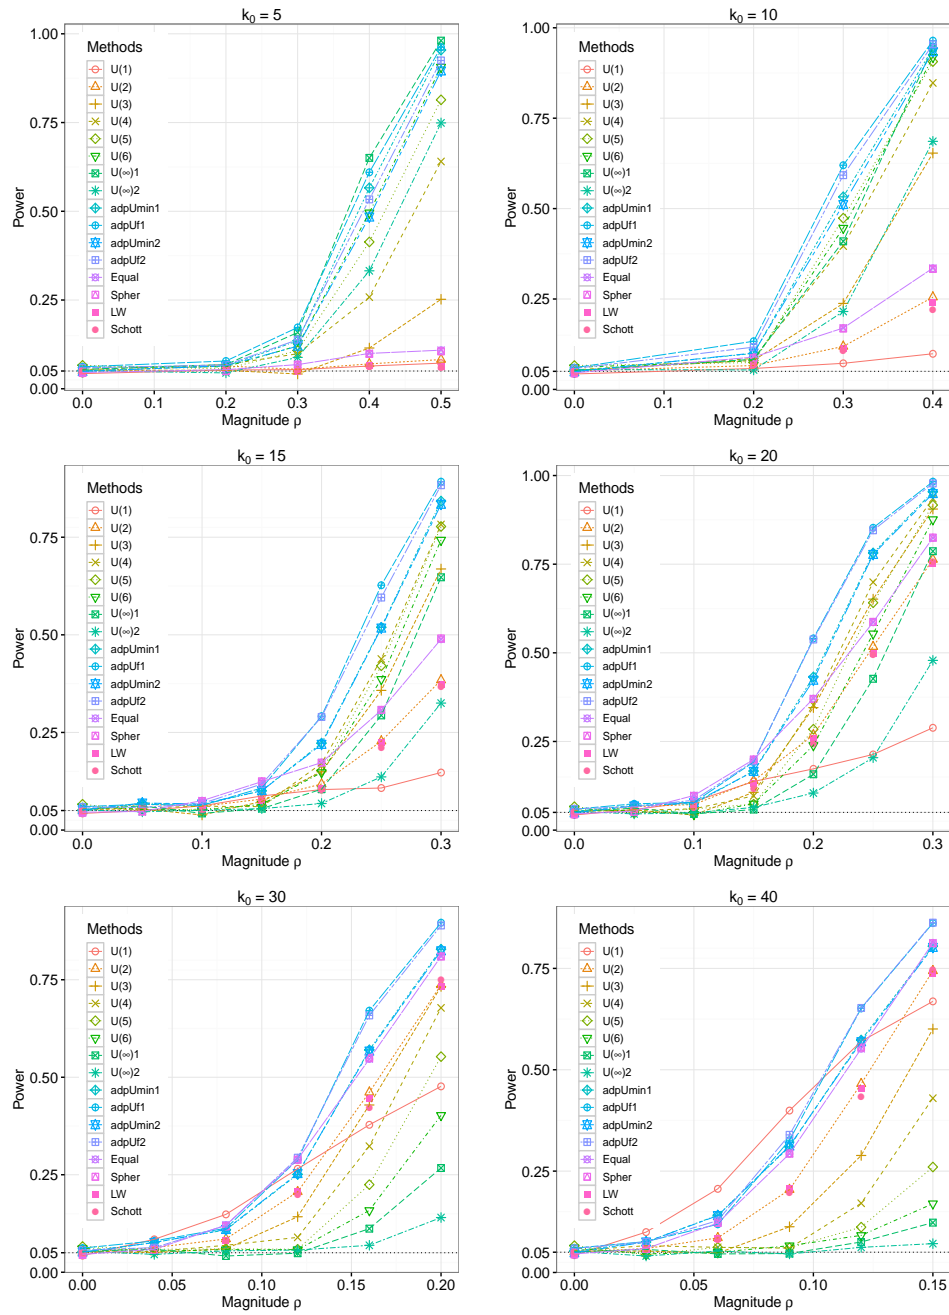Fig S2: Study 2:  $n = 100, p = 600$ .

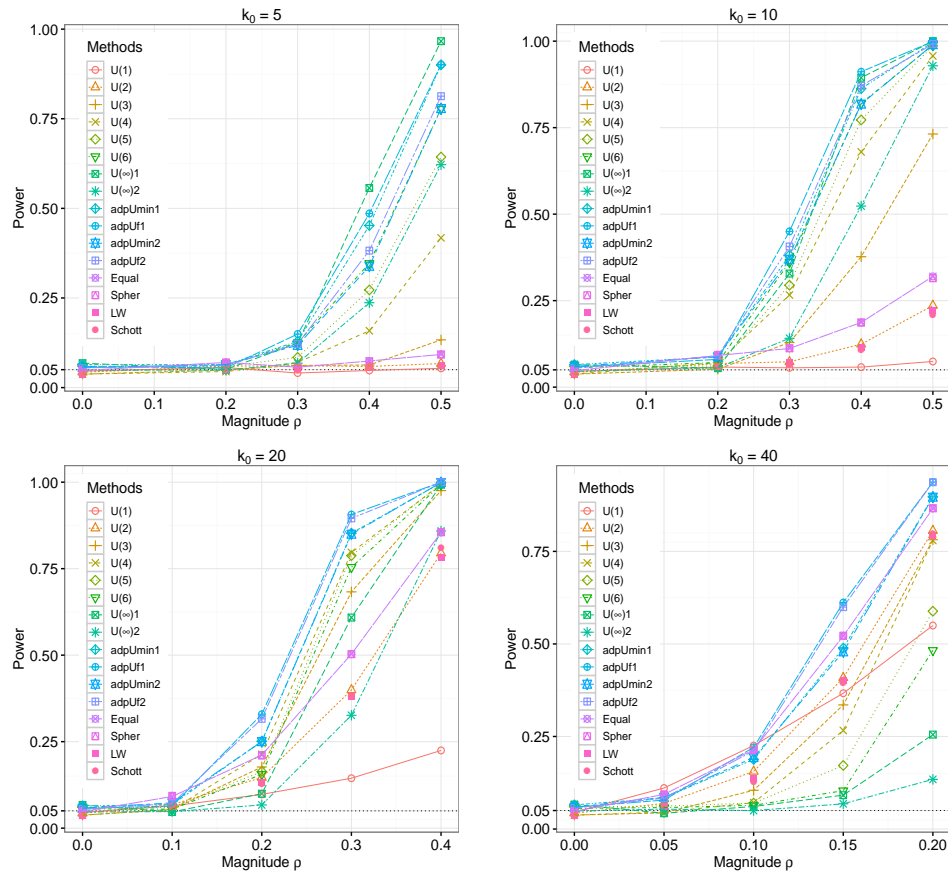Fig S3: Study 2:  $n = 100, p = 1000$ .

C.2.3. *Study 3.* We provide supplementary simulations for the third setting in Section 3.1. In particular, we generate  $n$  i.i.d.  $p$ -dimensional  $\mathbf{x}_i$  for  $i = 1, \dots, n$ , and  $\mathbf{x}_i$  follows multivariate Gaussian distribution with mean zero and covariance  $\Sigma_A$ . In this case,  $\Sigma_A$  is symmetric and positive definite, and has the diagonal being all one and only  $|J_A|$  random positions being nonzero with value  $\rho$ . Note that here  $\rho$  represents the magnitude of the alternative signal; and  $|J_A|$  represents its sparsity level with a larger value indicating a denser alternative, and vice versa. We let  $|J_A|$  and  $\rho$  vary to examine how the power changes correspondingly. We take  $(n, p) \in \{(100, 600), (100, 1000)\}$ , and provide the results in the following Figures S4–S5 respectively. The meanings of the legends are the same as in Tables S1 and S2, and are already explained in Section C.2.1. We observe similar patterns to that in the figures in Section C.2.2.

C.2.4. *Study 4.* In this section, we provide the simulation results of the fourth setting in Section 3.1. In particular, we generate  $n$  i.i.d.  $p$ -dimensional  $\mathbf{x}_i$  for  $i = 1, \dots, n$ , and  $\mathbf{x}_i$  follows multivariate Gaussian distribution with mean zero and covariance  $\Sigma_A$ . Under this setting,  $\Sigma_A$  is symmetric and positive definite and has the diagonal being all one and  $|J_A|$  random positions taking values uniformly in the range  $(0, 2\rho)$ . Therefore, the nonzero off-diagonal elements in  $\Sigma_A$  are different. Figure S6 below presents the power versus  $\rho$  when  $n = 100$  and  $p = 1000$ . The meanings of the legends are the same as in Tables S1 and S2, and are already explained in Section C.2.1. We observe similar patterns to that in the figures in Section C.2.2.

C.2.5. *Study 5.* In this section, we compare our methods with the methods in Chen et al. [8] following their multivariate models. Specifically, for each  $i = 1, \dots, n$ ,  $\mathbf{x}_i = \Xi \mathbf{z}_i + \boldsymbol{\mu}$ , where  $\Xi$  is a matrix of dimension  $p \times m$  with  $m \geq p$ . Under null hypothesis,  $m = p$ ,  $\Xi = I_p$ ,  $\boldsymbol{\mu} = \mu_0 \mathbf{1}_p$  with  $\mu_0 = 2$ ; under alternative hypothesis,  $m = p + 1$ ,  $\boldsymbol{\mu} = 2(\sqrt{1-\rho} + \sqrt{2\rho}) \mathbf{1}_p$ ,  $\Xi = (\sqrt{1-\rho} I_p, \sqrt{2\rho} \mathbf{1}_p)$ , thus  $\Sigma = (1-\rho)I_p + 2\rho \mathbf{1}_p \mathbf{1}_p^\top$ . Two settings are examined: first,  $\mathbf{z}_i$ 's are i.i.d. multivariate Gaussian random vectors with mean  $\mathbf{0}$  and covariance  $I_p$ ; second,  $\mathbf{z}_i = (z_{i,1}, \dots, z_{i,m})^\top$  consists of i.i.d. random variables  $z_{i,j}$  which are standardized Gamma(4, 0.5) random variables so that  $\mathbf{z}_i$  has mean  $\mathbf{0}$  and covariance  $I_p$ .

To mimic “large  $p$ , small  $n$ ” situation, [8] sets dimension  $p = c_1 \exp(n^\eta) + c_2$ , where  $\eta = 0.4$ , for  $(c_1, c_2) = (1, 10)$  and  $(c_1, c_2) = (2, 0)$  respectively. In particular, we consider  $(n, p) \in \{(40, 159), (40, 331), (80, 159), (80, 331), (80, 642)\}$ . The results are based on 1000 simulations and the nominal significance level of the tests is 5%.

In the tables S3–S10, results outside and inside parentheses are calculated



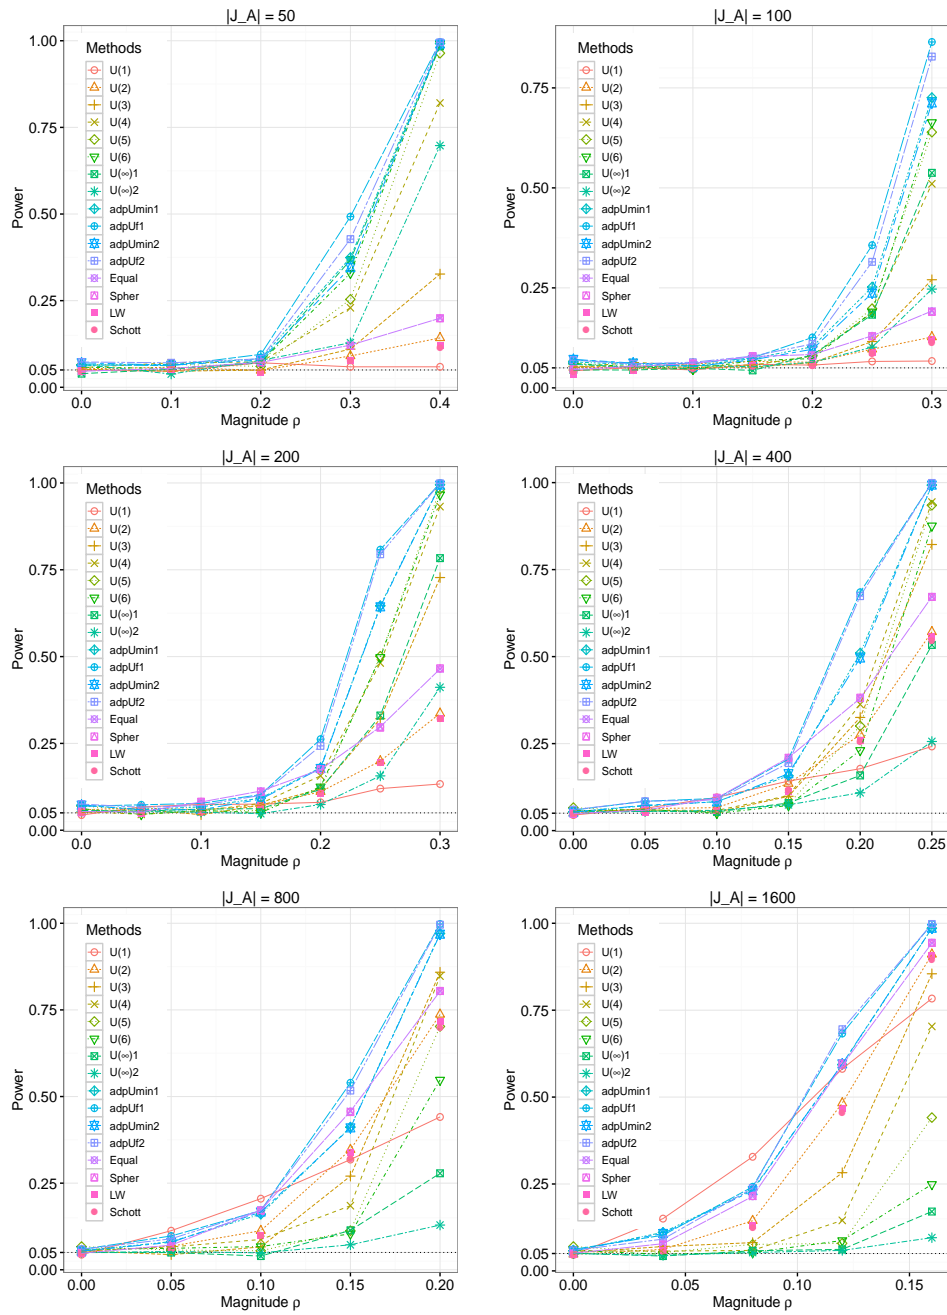Fig S4: Study 3:  $n = 100, p = 600$ .

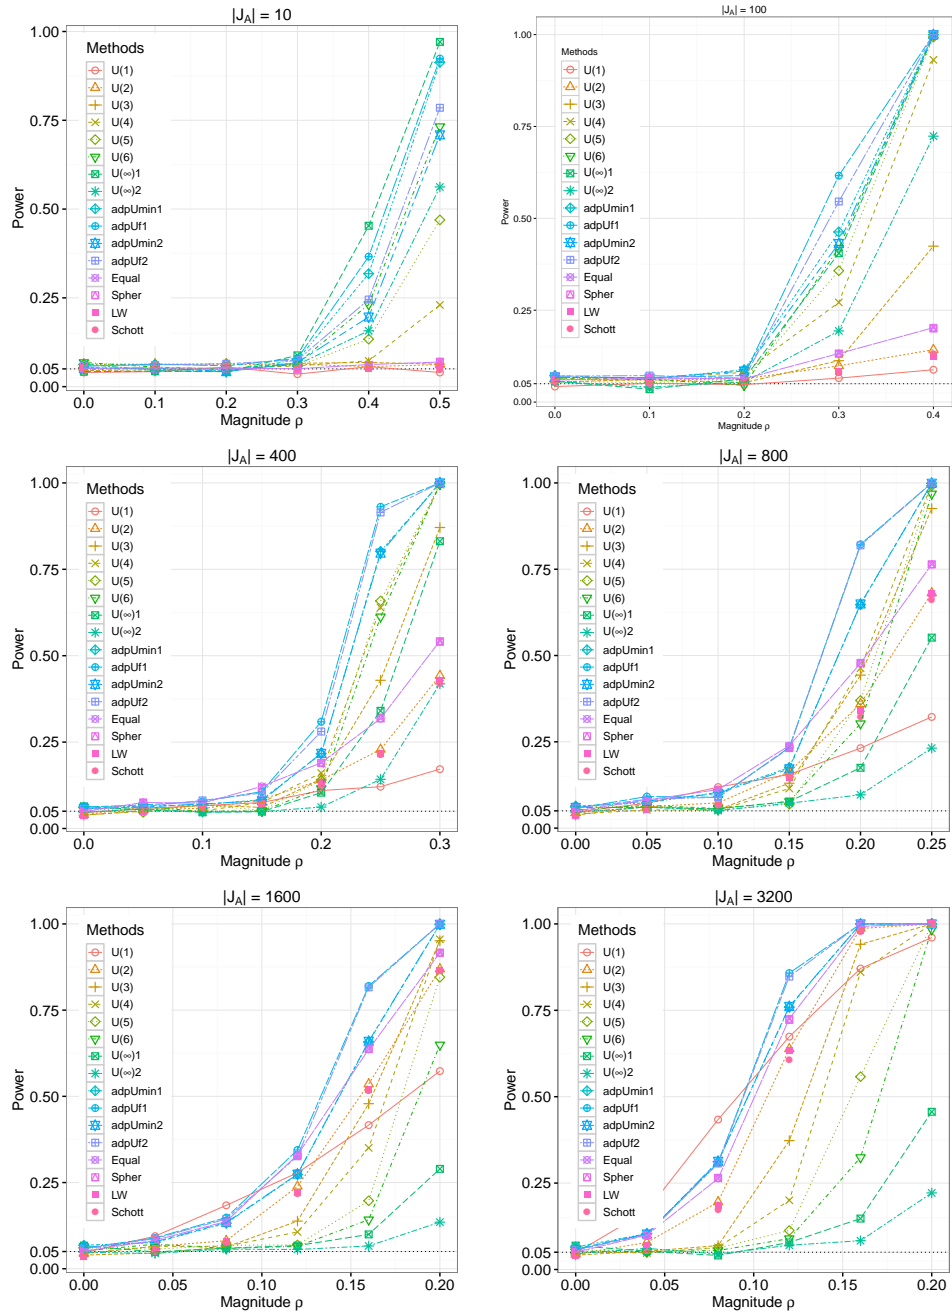Fig S5: Study 3:  $n = 100, p = 1000$ .

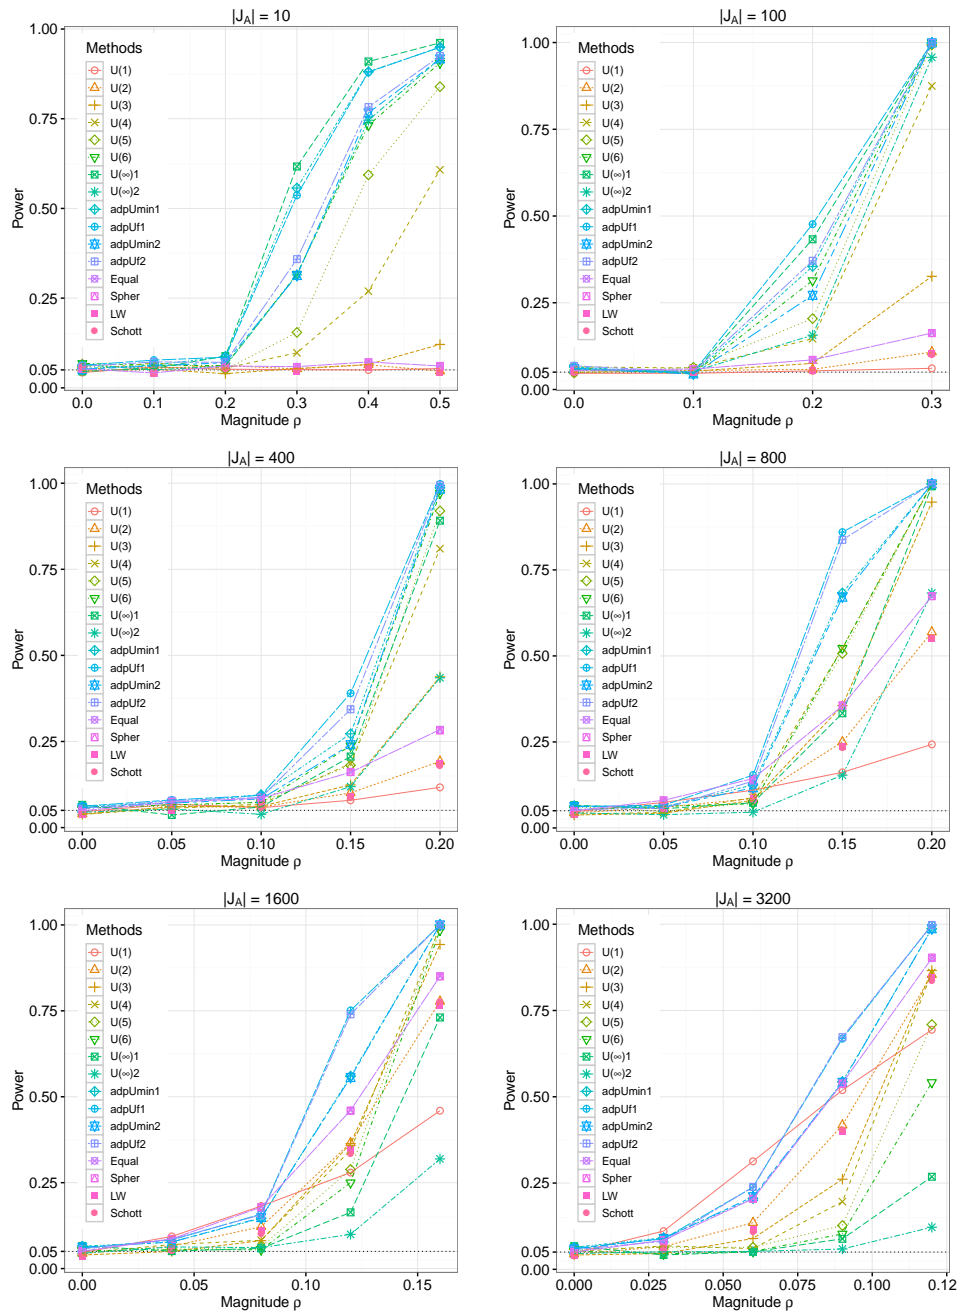Fig S6: Study 4:  $n = 100, p = 1000$ .

from parametric-permutation- and asymptotics-based methods, respectively. To be specific, psparametric-permutation-based method means estimating  $p$ -values or powers by permutation; and asymptotic-based method uses the asymptotic theoretical results and is described in Section 2.3. For each  $a \in \{1, \dots, 6, \infty\}$ , the row of “ $\mathcal{U}(a)$ ” has results using the single test statistic  $\mathcal{U}(a)$ ; and the row of “adpU” is obtained by the adaptive testing procedure which combines all single candidate U-statistics in the tables using the minimum combination. In addition, “Ident” and “Spher” rows denote the identity and sphericity tests in [8] separately.

In the tables S3–S8, we find that the empirical sizes of most tests are close to the nominal level, except  $\mathcal{U}(\infty)$  due to the slow convergence to extreme value distribution as pointed out in [13]. “Ident” and “Spher” tests perform similarly to  $\mathcal{U}(2)$  in both settings. This is reasonable because they are all sum-of-squares-type statistics. Moreover, for the  $\rho$ 's examined,  $\mathcal{U}(1)$  has higher power than  $\mathcal{U}(2)$ , as the constructed alternative is very dense and only has positive entries. In addition, “adpU” achieves high power for different cases, and its power converges to 1, as one of the test statistics has power converging to 1. In Tables S9 and S10, data are standardized with sample mean and variance. It can be seen that methods in [8] perform poorly in this case. Other than this, the results follow similar patterns to results in other tables.

TABLE S3  
Empirical Type I errors and power (%) under simulation setting 1.  $n = 80, p = 331$ .

| $\rho$                | 0         | 0.001       | 0.002       | 0.003       | 0.004       |
|-----------------------|-----------|-------------|-------------|-------------|-------------|
| $\mathcal{U}(1)$      | 4.4 (4)   | 93.4 (90.6) | 100 (99.9)  | 100 (100)   | 100 (100)   |
| $\mathcal{U}(2)$      | 5 (5.6)   | 5.5 (6)     | 7.2 (5.9)   | 13.1 (10.2) | 19.7 (14.4) |
| $\mathcal{U}(3)$      | 5.4 (6.1) | 4.5 (4)     | 6.3 (5.4)   | 6.9 (4.5)   | 9 (5.4)     |
| $\mathcal{U}(4)$      | 4.7 (5.1) | 6 (5.4)     | 3.7 (4.6)   | 4.2 (5.3)   | 6 (4.8)     |
| $\mathcal{U}(5)$      | 5.4 (6.3) | 4.9 (4.7)   | 5.3 (5.6)   | 6 (5.7)     | 6.1 (5.1)   |
| $\mathcal{U}(6)$      | 4.6 (4.9) | 5.8 (5.4)   | 4.9 (4.5)   | 5.2 (4.8)   | 4.8 (5)     |
| $\mathcal{U}(\infty)$ | 4.7 (0.3) | 5 (0.6)     | 5.5 (0.7)   | 5.1 (0.4)   | 5.9 (0.8)   |
| aSPU                  | 5 (5.4)   | 81 (81.8)   | 99.4 (99.4) | 100 (100)   | 100 (100)   |
| Ident                 | 5.5       | 5.7         | 8.2         | 14.4        | 21.8        |
| Spher                 | 5.6       | 5.7         | 8.1         | 14.2        | 21.4        |

TABLE S4  
*Empirical Type I errors and power (%) under simulation setting 2;  $n = 80, p = 331$ .*

| $\rho$                | 0         | 0.001       | 0.002       | 0.003       | 0.004       |
|-----------------------|-----------|-------------|-------------|-------------|-------------|
| $\mathcal{U}(1)$      | 5.3 (4.6) | 56.7 (50.3) | 92.5 (89.3) | 99.3 (99.1) | 100 (99.8)  |
| $\mathcal{U}(2)$      | 5.4 (5)   | 5.5 (5.7)   | 6.9 (5.4)   | 7.7 (5.8)   | 11.4 (7.3)  |
| $\mathcal{U}(3)$      | 5.6 (5.4) | 4.5 (3.5)   | 5.7 (4)     | 5.8 (4.8)   | 7.2 (5.1)   |
| $\mathcal{U}(4)$      | 4.8 (3.9) | 4.9 (4.1)   | 4.9 (5)     | 6.5 (6.8)   | 4.9 (5.1)   |
| $\mathcal{U}(5)$      | 6.1 (5.1) | 5.6 (6.1)   | 5.1 (5.2)   | 5.5 (5.7)   | 5.2 (5.5)   |
| $\mathcal{U}(6)$      | 6.4 (5.6) | 5.4 (4.1)   | 5.1 (5.3)   | 5.1 (5.4)   | 5.8 (5.3)   |
| $\mathcal{U}(\infty)$ | 5.5 (3)   | 5.3 (2.5)   | 6 (2.8)     | 5.5 (2.8)   | 6.8 (3.1)   |
| adpU                  | 6.4 (6.5) | 35 (36.3)   | 78.7 (79.2) | 96.1 (96.1) | 99.5 (99.6) |
| Ident                 | 6.7       | 6.5         | 7.4         | 9.2         | 13.5        |
| Spher                 | 6.2       | 6.2         | 7           | 9.1         | 12.9        |

TABLE S5  
*Empirical Type I errors and power (%) under simulation setting 1;  $n = 40, p = 159$ .*

| $\rho$                | 0         | 0.0005      | 0.001       | 0.0015      | 0.002       | 0.0025      |
|-----------------------|-----------|-------------|-------------|-------------|-------------|-------------|
| $\mathcal{U}(1)$      | 5.8 (4.6) | 16.6 (13.6) | 36.5 (32.3) | 57.4 (51.3) | 69.2 (65.1) | 83.3 (80)   |
| $\mathcal{U}(2)$      | 5.2 (4.9) | 4.6 (3.1)   | 4.6 (5.6)   | 5.3 (4.5)   | 5.5 (4.8)   | 5.9 (4.8)   |
| $\mathcal{U}(3)$      | 4.9 (4.8) | 5.8 (5.4)   | 5.6 (5.6)   | 5.6 (4.9)   | 4.6 (4.7)   | 5.6 (5)     |
| $\mathcal{U}(4)$      | 4.6 (5.7) | 4.2 (4.1)   | 5.6 (4.6)   | 4.7 (4.6)   | 4.5 (5.1)   | 5.3 (4.9)   |
| $\mathcal{U}(5)$      | 5.5 (5.6) | 5.3 (6.2)   | 5.7 (4.9)   | 3.1 (3.1)   | 4.7 (4.4)   | 5.5 (5.4)   |
| $\mathcal{U}(6)$      | 4.4 (4.3) | 4.8 (4.6)   | 4.4 (4.7)   | 4.3 (4.3)   | 4.8 (4.6)   | 5 (4.2)     |
| $\mathcal{U}(\infty)$ | 5.1 (0.1) | 5.1 (0.1)   | 4.2 (0)     | 4.6 (0.1)   | 4.6 (0)     | 5.5 (0.1)   |
| adpU                  | 5.7 (5.8) | 8.9 (10.6)  | 18.5 (21.1) | 31.5 (34.2) | 47.4 (50.8) | 63.2 (66.2) |
| Ident                 | 5.8       | 5.3         | 5.9         | 6.8         | 6.8         | 7.1         |
| Spher                 | 5.8       | 5.1         | 5.7         | 6.5         | 6.5         | 7.2         |

TABLE S6  
*Empirical Type I errors and power (%) under simulation setting 1;  $n = 40, p = 331$ .*

| $\rho$                | 0         | 0.0025      | 0.005       | 0.01        | 0.015       | 0.02        |
|-----------------------|-----------|-------------|-------------|-------------|-------------|-------------|
| $\mathcal{U}(1)$      | 5.9 (5.4) | 99.4 (99.3) | 100 (100)   | 100 (100)   | 100 (100)   | 100 (100)   |
| $\mathcal{U}(2)$      | 5.1 (4.4) | 7 (6.3)     | 15.5 (10.7) | 65.8 (60)   | 95.1 (93.1) | 99.3 (98.7) |
| $\mathcal{U}(3)$      | 5.4 (5.5) | 7.6 (4.6)   | 13 (7.5)    | 26.3 (19.7) | 53.9 (44.1) | 76.9 (68.9) |
| $\mathcal{U}(4)$      | 4.8 (5.1) | 4.9 (5.4)   | 6.8 (5.6)   | 6.3 (6.6)   | 11.4 (7.7)  | 14.4 (11.7) |
| $\mathcal{U}(5)$      | 5.9 (4.8) | 5.5 (4.9)   | 7 (6.6)     | 5.6 (4.9)   | 8.6 (7.3)   | 8.5 (8.2)   |
| $\mathcal{U}(6)$      | 4.1 (4.9) | 3.4 (4.5)   | 6.8 (4.6)   | 4.8 (6.5)   | 5.5 (6.6)   | 8 (8.6)     |
| $\mathcal{U}(\infty)$ | 4.2 (0)   | 4.1 (0)     | 6.1 (0)     | 4.9 (0)     | 6.6 (0)     | 7.3 (0.1)   |
| adpU                  | 5.2 (5.8) | 97.5 (98.5) | 100 (100)   | 100 (100)   | 100 (100)   | 100 (100)   |
| Ident                 | 6.2       | 8.3         | 19.2        | 68          | 95.5        | 99.3        |
| Spher                 | 6.3       | 8.2         | 18.6        | 67.6        | 95.4        | 99.3        |

TABLE S7  
*Empirical Type I errors and power (%) under simulation setting 1;  $n = 80, p = 159$ .*

| $\rho$                | 0         | 0.0025      | 0.005       | 0.01        | 0.015       | 0.02        |
|-----------------------|-----------|-------------|-------------|-------------|-------------|-------------|
| $\mathcal{U}(1)$      | 5.7 (4.7) | 98.1 (97)   | 100 (100)   | 100 (100)   | 100 (100)   | 100 (100)   |
| $\mathcal{U}(2)$      | 6.2 (5.1) | 6.8 (5.5)   | 16.5 (11.4) | 68.4 (60.6) | 96.7 (94.7) | 100 (99.9)  |
| $\mathcal{U}(3)$      | 6 (4.7)   | 6.2 (5.5)   | 7.4 (5.9)   | 15.2 (9.2)  | 34.8 (26.2) | 69.2 (61.4) |
| $\mathcal{U}(4)$      | 5.4 (5.6) | 4 (3.8)     | 4.7 (4.2)   | 7.6 (7.1)   | 10.6 (9)    | 18.2 (15.7) |
| $\mathcal{U}(5)$      | 4.5 (4.9) | 4.6 (4.2)   | 4.8 (4.5)   | 5.3 (5.3)   | 9.6 (7.6)   | 13.1 (13)   |
| $\mathcal{U}(6)$      | 5.6 (5.3) | 3.9 (4.7)   | 4 (3.3)     | 5.3 (4.9)   | 8.7 (8)     | 12 (12.4)   |
| $\mathcal{U}(\infty)$ | 4.5 (0.8) | 6.1 (1.1)   | 4.9 (1.4)   | 5.4 (1.7)   | 8 (1.5)     | 10.7 (3.3)  |
| adpU                  | 5.7 (7)   | 91.8 (92.6) | 99.8 (99.8) | 100 (100)   | 100 (100)   | 100 (100)   |
| Ident                 | 6.7       | 7.8         | 18.5        | 71.1        | 97.3        | 100         |
| Spher                 | 6.7       | 7.2         | 18          | 69.6        | 97          | 100         |

TABLE S8  
*Empirical Type I errors and power (%) under simulation setting 1;  $n = 80, p = 642$ .*

| $\rho$                | 0         | 0.0025      | 0.005       | 0.01        | 0.015      | 0.02        |
|-----------------------|-----------|-------------|-------------|-------------|------------|-------------|
| $\mathcal{U}(1)$      | 5.8 (4.8) | 100 (100)   | 100 (100)   | 100 (100)   | 100 (100)  | 100 (100)   |
| $\mathcal{U}(2)$      | 6.4 (6.2) | 17.9 (12.7) | 71.2 (63.4) | 99.8 (99.8) | 100 (100)  | 100 (100)   |
| $\mathcal{U}(3)$      | 5.2 (5.6) | 6.2 (3.6)   | 19.3 (13.3) | 68.4 (57.3) | 96.4 (94)  | 99.8 (99.6) |
| $\mathcal{U}(4)$      | 5.2 (5.2) | 6.2 (6.4)   | 5.2 (5.2)   | 8.5 (6.4)   | 25 (18.3)  | 57.9 (51.7) |
| $\mathcal{U}(5)$      | 6.4 (4.6) | 5 (5.2)     | 6.4 (5.4)   | 7.8 (7.2)   | 11.7 (9.9) | 21.1 (16.9) |
| $\mathcal{U}(6)$      | 4 (4.2)   | 5.8 (6.4)   | 6 (6)       | 4.2 (5.2)   | 9.3 (10.3) | 13.1 (15.3) |
| $\mathcal{U}(\infty)$ | 4.4 (0.6) | 5 (0.2)     | 5.6 (0.4)   | 7 (0.8)     | 9.3 (0.8)  | 15.3 (0.6)  |
| adpU                  | 6 (4.2)   | 100 (100)   | 100 (100)   | 100 (100)   | 100 (100)  | 100 (100)   |
| Ident                 | 6.8       | 18.9        | 72.6        | 100         | 100        | 100         |
| Spher                 | 6.6       | 18.7        | 72.6        | 100         | 100        | 100         |

TABLE S9  
*Empirical Type I errors and power (%) under simulation setting 2;  $n = 80, p = 159$ .*

| $\rho$                | 0         | 0.0005      | 0.001       | 0.002       | 0.003       | 0.004       |
|-----------------------|-----------|-------------|-------------|-------------|-------------|-------------|
| $\mathcal{U}(1)$      | 4.9 (4.2) | 26.1 (20.4) | 57.1 (49.7) | 95.2 (93.1) | 99.9 (99.8) | 100 (99.9)  |
| $\mathcal{U}(2)$      | 4.9 (4.4) | 3.9 (5.3)   | 5.9 (5.2)   | 6.7 (4.8)   | 8.3 (5.6)   | 12.2 (7.7)  |
| $\mathcal{U}(3)$      | 5.4 (5.2) | 4.7 (5.3)   | 4.3 (4.1)   | 6 (4)       | 5.9 (5.1)   | 7 (5)       |
| $\mathcal{U}(4)$      | 5.4 (4.9) | 5.5 (5.2)   | 4.8 (4.8)   | 5.9 (6.3)   | 6.7 (7.2)   | 4.6 (4.6)   |
| $\mathcal{U}(5)$      | 7.3 (6.2) | 5.4 (5.6)   | 5.8 (6.5)   | 5.3 (6.3)   | 5.8 (5.5)   | 5.6 (5.6)   |
| $\mathcal{U}(6)$      | 6.5 (5.6) | 4.9 (5)     | 5.5 (5.3)   | 4.9 (5.2)   | 5.5 (5.4)   | 4.2 (4.7)   |
| $\mathcal{U}(\infty)$ | 5.9 (3)   | 5.7 (2.1)   | 5.8 (2.5)   | 5.7 (2.6)   | 5.5 (2.9)   | 6.7 (3.3)   |
| adpU                  | 5.7 (5)   | 12.1 (13.1) | 34.8 (34.6) | 81.9 (82.6) | 98.1 (98.1) | 99.9 (99.8) |
| Ident                 | 0.2       | 0.1         | 0.1         | 0.2         | 0.1         | 0.1         |
| Spher                 | 0.2       | 0.1         | 0.1         | 0.2         | 0           | 0.1         |

TABLE S10  
*Empirical Type I errors and power (%) under simulation setting 2;  $n = 80, p = 642$ .*

| $\rho$                | 0         | 0.0005      | 0.001     | 0.002      | 0.003       | 0.004       |
|-----------------------|-----------|-------------|-----------|------------|-------------|-------------|
| $\mathcal{U}(1)$      | 2.8 (2.2) | 94.2 (93)   | 100 (100) | 100 (100)  | 100 (100)   | 100 (100)   |
| $\mathcal{U}(2)$      | 5.8 (4.2) | 4.2 (4.8)   | 6 (5.6)   | 11.9 (7.2) | 22.3 (14.5) | 45.9 (36.2) |
| $\mathcal{U}(3)$      | 3.6 (3.8) | 5.4 (5.2)   | 7.2 (5)   | 6 (3.6)    | 11.9 (7.6)  | 15.1 (9.3)  |
| $\mathcal{U}(4)$      | 4.4 (4.4) | 4.6 (4.4)   | 6.4 (6.2) | 4.8 (3.8)  | 5.4 (5.2)   | 7 (6.2)     |
| $\mathcal{U}(5)$      | 7 (5.6)   | 6 (5)       | 6.2 (5.4) | 7 (6.2)    | 6.6 (5.4)   | 7.4 (5.6)   |
| $\mathcal{U}(6)$      | 7 (5.4)   | 5 (4.6)     | 4.6 (5.6) | 6.8 (7.2)  | 5.4 (4.6)   | 5.6 (5.8)   |
| $\mathcal{U}(\infty)$ | 4.8 (2.2) | 6.2 (2.4)   | 4.8 (0.8) | 6.2 (3)    | 6.4 (2.6)   | 5.2 (1.6)   |
| adpU                  | 5 (4)     | 84.5 (85.9) | 100 (100) | 100 (100)  | 100 (100)   | 100 (100)   |
| Ident                 | 0         | 0.4         | 0.2       | 0.4        | 2.4         | 8.3         |
| Spher                 | 0         | 0.4         | 0.2       | 0.4        | 2.4         | 7.8         |

**C.3. Simulations on Other Testing Examples.** In this section, we provide the simulation results on other testing examples discussed in Section 4. We present simulations on generalized linear model in Section C.3.1. In addition, we provide simulations on two-sample covariance testing to examine the empirical type I error and power in Sections C.3.2 and C.3.3, respectively.

C.3.1. *Study 6: GLM.* In this study, we conduct simulations for generalized linear model considering the following model

$$(C.3.1) \quad y_i = \mathbf{z}_i^\top \boldsymbol{\alpha} + \mathbf{x}_i^\top \boldsymbol{\beta} + \epsilon_i,$$

for  $i = 1, \dots, n$ . We generate i.i.d.  $\mathbf{x}_i$  from the multivariate normal distribution  $\mathcal{N}(0, \Sigma)$ . We show the results with an equal variance and a first-order autoregressive correlation matrix case, that is,  $\Sigma = (0.4^{|i-j|})$ . We further generate  $\mathbf{z}_i$  of two covariates with entries i.i.d. from standard normal distribution  $\mathcal{N}(0, 1)$ , and  $\epsilon_i$  are the random errors following i.i.d. normal distribution  $\mathcal{N}(0, 0.5)$ . In (C.3.1), we take  $\boldsymbol{\alpha} = (0.3, 0.3)^\top$ ,  $\boldsymbol{\beta} = \mathbf{0}$  or  $\neq \mathbf{0}$  corresponded to the null hypothesis  $H_0$  and the alternative hypothesis  $H_A$ , respectively. Under  $H_A$ ,  $\lfloor ps \rfloor$  elements in  $\boldsymbol{\beta}$  are set to be non-zero, where  $s \in [0, 1]$  controls signal sparsity. We vary  $s$  to mimic varying sparsity situations, from sparse to dense signals with  $s \in \{0.001, 0.1, 0.3, 0.7, 0.9\}$ . The positions of non-zero elements in  $\boldsymbol{\beta}$  are assumed to be uniformly distributed in  $\{1, 2, \dots, p\}$ , and their values are constant  $c$ , where  $c$  is the effect of signals that vary in the simulations. The results are based on 1000 simulations with 5% nominal significance level,  $n = 500$  and  $p = 1000$ . We summarized the results in Figure S7. It shows similar patterns as in Study I.

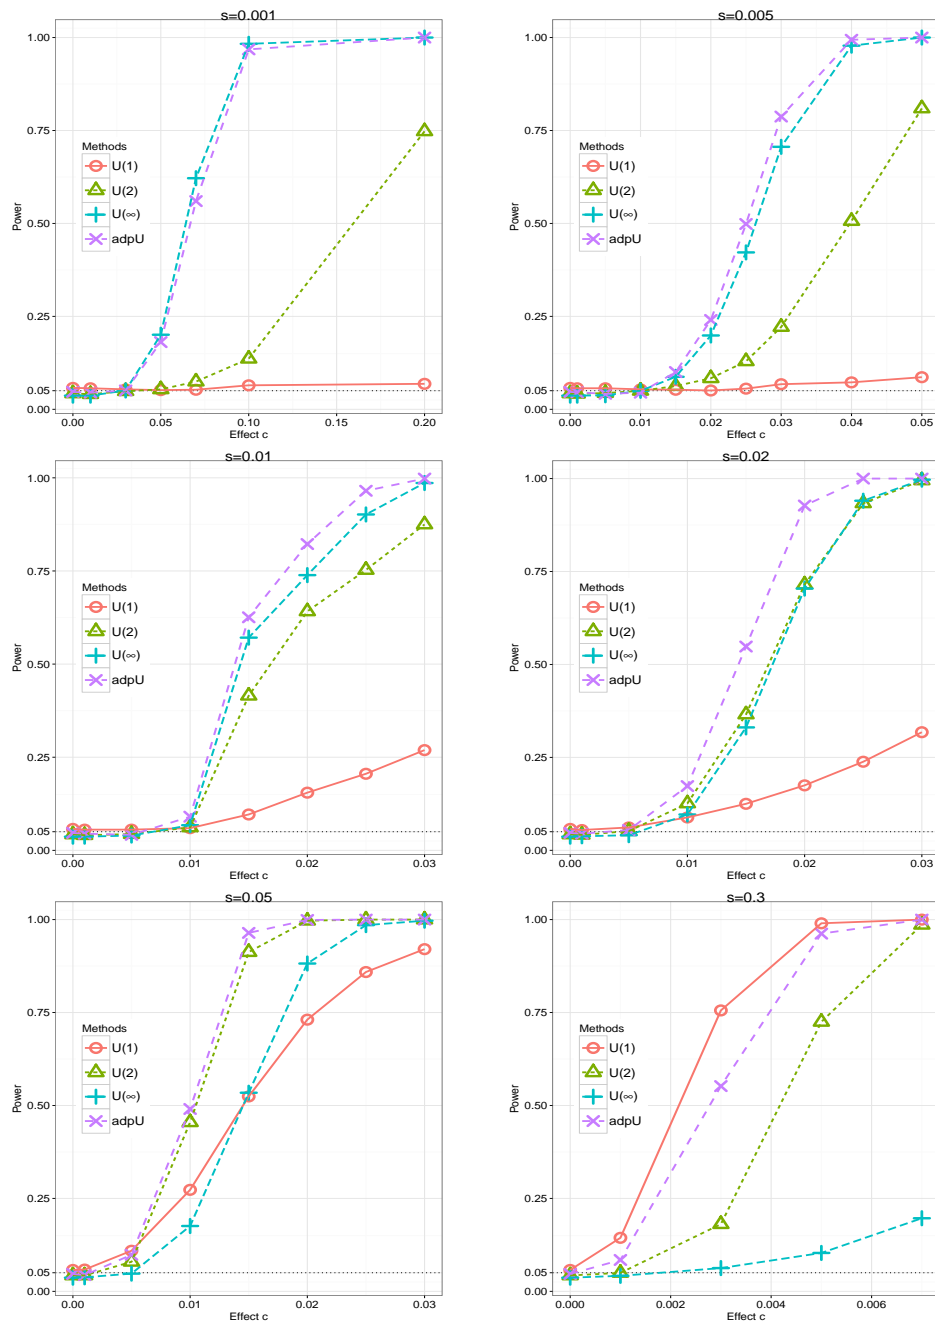

Fig S7: Power comparison under generalized linear model simulation setting.



C.3.2. *Study 7: Two-sample covariance testing under  $H_0$ .* In this section, we examine the empirical Type I errors of the proposed the adaptive testing procedure and compare it with the other methods.

We follow the simulation settings in Yang and Pan [29]. In particular, let  $A(s)$  be the  $s \times s$  covariance matrix of MA(1) model with the parameter  $\theta_1 = 0.4$ . In addition,  $B = 0.7I_{p-s}$  is a  $(p-s) \times (p-s)$  scaled identity matrix. We then define the matrix  $Q(s) = \text{BlkDiag}(A(s), B)$ , where “BlkDiag” indicates a block diagonal matrix. We take  $s = p^{1/2}$  and  $n = 100$ , and consider  $\Sigma_x = \Sigma_y = Q(s)$ . The results are presented in Table S11.

In Table S11, we provide the simulation results of the single U-statistics  $\mathcal{U}(a)$  with  $a \in \{1, \dots, 6\}$ . In addition, we provide the simulation results of  $\mathcal{U}(\infty)$  using permutation and the asymptotic distribution in Cai et al. [5], which are denoted as “ $\mathcal{U}(\infty)$  permutation” and “ $\mathcal{U}(\infty)$  Tony” respectively. Given the results of  $\mathcal{U}(1), \dots, \mathcal{U}(6)$  and “ $\mathcal{U}(\infty)$  (permutation)”, “adpUmin 1” and “adpUf 1” represent the results of the adaptive testing procedure using minimum combination and Fisher’s method respectively. Similarly, given the results of  $\mathcal{U}(1), \dots, \mathcal{U}(6)$  and “ $\mathcal{U}(\infty)$  (Tony)”, “adpUmin 2” and “adpUf 2” represent the results of the adaptive testing procedure using minimum combination and Fisher’s method respectively. Moreover, “Schott”, “Sriva” and “Chen” represent the methods in Schott [24], Srivastava and Yanagihara [25] and Li and Chen [22], respectively. In addition, we denote the tests without and with Micro term in Yang and Pan [29] as “Pan1” and “Pan2” respectively. The tests in [29] are time-consuming. Therefore we only provide the simulation results at  $p = 50$ , which takes about 100 times the time of the proposed adaptive testing procedure.

Based on our simulation results, we find that the empirical Type I errors of the single U-statistics are close the nominal levels, which verifies the theoretical results of Theorem 4.6. Moreover, comparing “ $\mathcal{U}(\infty)$  (permutation)” and “ $\mathcal{U}(\infty)$  (Tony)”, we find that using the asymptotic distribution in Cai et al. [5] gives conservative Type I errors that are smaller than the nominal levels. In addition, by examining the results of minimum combination and Fisher’s method, we find that both of the two methods give empirical Type I errors that are close to the nominal level, while the Fisher’s method may have slight size inflation compared to the minimum combination.

TABLE S11  
*Empirical Type-I errors under  $\Sigma_x = \Sigma_y = Q(s)$ ;  $n = 100$ ,  $s = p^{1/2}$*

| $p$                                 | 50    | 100   | 200   | 300   |
|-------------------------------------|-------|-------|-------|-------|
| $\mathcal{U}(1)$                    | 0.052 | 0.055 | 0.040 | 0.039 |
| $\mathcal{U}(2)$                    | 0.051 | 0.060 | 0.053 | 0.047 |
| $\mathcal{U}(3)$                    | 0.048 | 0.061 | 0.054 | 0.054 |
| $\mathcal{U}(4)$                    | 0.039 | 0.059 | 0.067 | 0.053 |
| $\mathcal{U}(5)$                    | 0.056 | 0.046 | 0.041 | 0.066 |
| $\mathcal{U}(6)$                    | 0.045 | 0.044 | 0.041 | 0.044 |
| $\mathcal{U}(\infty)$ (permutation) | 0.047 | 0.042 | 0.049 | 0.052 |
| adpUmin 1                           | 0.043 | 0.057 | 0.059 | 0.053 |
| adpUf 1                             | 0.076 | 0.081 | 0.060 | 0.076 |
| $\mathcal{U}(\infty)$ (Tony)        | 0.018 | 0.024 | 0.016 | 0.013 |
| adpUmin 2                           | 0.044 | 0.056 | 0.059 | 0.051 |
| adpUf 2                             | 0.051 | 0.056 | 0.040 | 0.050 |
| Chen                                | 0.050 | 0.049 | 0.049 | 0.050 |
| Sriva                               | 0.166 | 0.002 | 0.000 | 0.000 |
| Schott                              | 0.074 | 0.119 | 0.236 | 0.418 |
| Pan1                                | 0.055 | NA    | NA    | NA    |
| Pan2                                | 0.058 | NA    | NA    | NA    |

C.3.3. *Study 8: Two-sample covariance testing power.* In this section, we examine the power of the two-sample covariance testing.

We follow the covariance matrix models in Yang and Pan [29]. In particular, let  $H(\tau_0, \tau_1, r) = (h_{i,j})_{p \times p}$ , where  $h_{i,j} = 0$  except  $h_{i,i} = \tau_0$ ,  $i = 1, \dots, r$  and  $h_{i,i+1} = h_{i,i-1} = \tau_1$ ,  $i = 1, \dots, r-1$ . Here  $\tau_0$  and  $\tau_1$  are used to measure the level of faint alternatives and  $r$  is used to measure the sparsity level of alternative. We fix  $\Sigma_x = I_p$ , the  $p \times p$  identity matrix, and examine the following three representative covariance matrix models of  $\Sigma_y$ .

*Model 1:* (Extreme faint,  $\tau_0 = 0.04$ ,  $\tau_1 = 0.2$ ,  $r = p$ ).  $\Sigma_y = I_p + H(0.04, 0.2, p)$ . This matrix can also be considered as the covariance matrix of MA(1) model with the parameter  $\theta_1 = 0.2$ , which is also used in Li and Chen [22].

*Model 2:* (Extreme sparse,  $\tau_0 = 1$ ,  $\tau_1 = 1.5$ ,  $r = 2$ ).  $\Sigma_y = I_p + H(1, 1.5, 2)$ . This model only has four large disturbances compared with  $\Sigma_x$ , which is regarded as the extreme sparse (ES) alternative.

*Model 3:* (Reasonable faint and sparse,  $\tau_0 = 0.3$ ,  $\tau_1 = 0.3$ ,  $r = p/10$ )  $\Sigma_y = I_p + H(0.3, 0.3, p/10)$ . The value of  $r$  here is between 2 (in Model 2) and  $p$  (in Model 1), which is regarded as a moderately sparse setting.

Under each model above, we take  $n = 100$ ,  $p \in \{50, 100, 200, 300\}$ , and provide the simulation results of the Models 1–3 in the Tables S12–S14 respectively. The explanation of each row are the same as in Table S11, which is given in Section C.3.2. Similarly, we note that the tests in Yang and Pan [29] are very time-consuming. Therefore for “Pan 1” and “Pan 2”,

we only provide the simulation results at  $p = 50$ , which takes about 100 times the time of the proposed adaptive testing procedure.

TABLE S12  
*Empirical Power under Model 1 (Extreme faint);  $n = 100$ .*

| $p$                                 | 50    | 100   | 200   | 300   |
|-------------------------------------|-------|-------|-------|-------|
| $\mathcal{U}(1)$                    | 0.397 | 0.389 | 0.408 | 0.416 |
| $\mathcal{U}(2)$                    | 0.445 | 0.458 | 0.456 | 0.484 |
| $\mathcal{U}(3)$                    | 0.290 | 0.309 | 0.354 | 0.371 |
| $\mathcal{U}(4)$                    | 0.197 | 0.211 | 0.199 | 0.205 |
| $\mathcal{U}(5)$                    | 0.244 | 0.397 | 0.752 | 0.855 |
| $\mathcal{U}(6)$                    | 0.054 | 0.052 | 0.054 | 0.091 |
| $\mathcal{U}(\infty)$ (permutation) | 0.066 | 0.062 | 0.044 | 0.029 |
| adpUmin 1                           | 0.478 | 0.511 | 0.692 | 0.783 |
| adpUf 1                             | 0.600 | 0.648 | 0.843 | 0.886 |
| $\mathcal{U}(\infty)$ (Tony)        | 0.091 | 0.072 | 0.087 | 0.072 |
| adpUmin 2                           | 0.480 | 0.513 | 0.691 | 0.781 |
| adpUf 2                             | 0.619 | 0.669 | 0.855 | 0.903 |
| Chen                                | 0.573 | 0.574 | 0.569 | 0.623 |
| Sriva                               | 0.513 | 0.586 | 0.598 | 0.569 |
| Schott                              | 0.667 | 0.731 | 0.888 | 0.956 |
| Pan1                                | 0.640 | NA    | NA    | NA    |
| Pan2                                | 0.669 | NA    | NA    | NA    |

TABLE S13  
*Empirical Power under Model 2 (Extreme sparse);  $n = 100$ .*

| $p$                                 | 50    | 100   | 200   | 300   |
|-------------------------------------|-------|-------|-------|-------|
| $\mathcal{U}(1)$                    | 0.068 | 0.056 | 0.048 | 0.049 |
| $\mathcal{U}(2)$                    | 0.725 | 0.364 | 0.122 | 0.086 |
| $\mathcal{U}(3)$                    | 0.993 | 0.960 | 0.850 | 0.660 |
| $\mathcal{U}(4)$                    | 1.000 | 0.997 | 0.988 | 0.956 |
| $\mathcal{U}(5)$                    | 0.934 | 0.874 | 0.803 | 0.682 |
| $\mathcal{U}(6)$                    | 0.972 | 0.960 | 0.935 | 0.914 |
| $\mathcal{U}(\infty)$ (permutation) | 0.966 | 0.919 | 0.852 | 0.772 |
| adpUmin 1                           | 1.000 | 0.992 | 0.984 | 0.959 |
| adpUf 1                             | 1.000 | 0.996 | 0.989 | 0.970 |
| $\mathcal{U}(\infty)$ (Tony)        | 0.999 | 1.000 | 0.997 | 1.000 |
| adpUmin 2                           | 1.000 | 0.997 | 0.993 | 0.995 |
| adpUf 2                             | 1.000 | 0.999 | 0.992 | 0.992 |
| Chen                                | 0.800 | 0.457 | 0.196 | 0.127 |
| Sriva                               | 0.787 | 0.433 | 0.166 | 0.101 |
| Schott                              | 0.864 | 0.640 | 0.550 | 0.654 |
| Pan1                                | 0.673 | NA    | NA    | NA    |
| Pan2                                | 0.694 | NA    | NA    | NA    |

We then analyze the simulation results. Model 1 is the extreme faint case and  $\Sigma_y - \Sigma_x$  is dense. We find that under this case, the U-statistics of

TABLE S14  
*Empirical Power under Model 3 (Reasonable faint and sparse);  $n = 100$ .*

| $p$                                 | 50    | 100   | 200   | 300   |
|-------------------------------------|-------|-------|-------|-------|
| $\mathcal{U}(1)$                    | 0.072 | 0.067 | 0.069 | 0.070 |
| $\mathcal{U}(2)$                    | 0.090 | 0.096 | 0.096 | 0.083 |
| $\mathcal{U}(3)$                    | 0.155 | 0.151 | 0.152 | 0.145 |
| $\mathcal{U}(4)$                    | 0.175 | 0.162 | 0.162 | 0.154 |
| $\mathcal{U}(5)$                    | 0.347 | 0.582 | 0.868 | 0.946 |
| $\mathcal{U}(6)$                    | 0.308 | 0.494 | 0.732 | 0.854 |
| $\mathcal{U}(\infty)$ (permutation) | 0.028 | 0.034 | 0.027 | 0.018 |
| adpUmin 1                           | 0.337 | 0.496 | 0.797 | 0.901 |
| adpUf 1                             | 0.355 | 0.535 | 0.802 | 0.910 |
| $\mathcal{U}(\infty)$ (asymptotic)  | 0.254 | 0.319 | 0.409 | 0.403 |
| adpUmin 2                           | 0.348 | 0.508 | 0.798 | 0.901 |
| adpUf 2                             | 0.426 | 0.620 | 0.862 | 0.940 |
| Chen                                | 0.138 | 0.149 | 0.153 | 0.144 |
| Sriva                               | 0.092 | 0.096 | 0.097 | 0.100 |
| Schott                              | 0.189 | 0.283 | 0.486 | 0.712 |
| Pan1                                | 0.167 | NA    | NA    | NA    |
| Pan2                                | 0.186 | NA    | NA    | NA    |

small orders, e.g.,  $\mathcal{U}(1)$  and  $\mathcal{U}(2)$  are powerful. The tests based on the sum-of-squares type statistics including “Chen”, “Sriva” and “Schott” are also powerful under this case. Our proposed adaptive testing procedure using Fisher’s method has comparable power performance to “Pan 1” and “Pan 2”, and is computationally more efficient. Model 2 is the extreme sparse case. Under this case, we find that generally U-statistics of higher orders, e.g.,  $\mathcal{U}(4)$  and  $\mathcal{U}(\infty)$ , are more powerful than the U-statistics of smaller orders, e.g.,  $\mathcal{U}(1)$  and  $\mathcal{U}(2)$ . Model 3 is the moderately faint and sparse case. Under this case, we can see that a finite-order U-statistic  $\mathcal{U}(5)$  is the most powerful one. Neither the maximum-type test statistic  $\mathcal{U}(\infty)$  and the sum-of-squares type test statistic  $\mathcal{U}(2)$ , “Chen”, “Sriva” and “Schott” are very powerful. Tests in [29] considering only faint or sparse alternatives are not very powerful under this case. On the other hand, the proposed adaptive testing procedure maintains high power under this case.

## REFERENCES

- [1] Bai, Z. and H. Saranadasa (1996). Effect of high dimension: by an example of a two sample problem. *Statistica Sinica*, 311–329.
- [2] Billingsley, P. (1995). *Probability and Measure* (3 ed.). John Wiley & Sons.
- [3] Cai, T. and W. Liu (2011). Adaptive thresholding for sparse covariance matrix estimation. *Journal of the American Statistical Association* 106(494), 672–684.
- [4] Cai, T. T. and T. Jiang (2011). Limiting laws of coherence of random matrices with

- applications to testing covariance structure and construction of compressed sensing matrices. *Ann. Statist.* 39(3), 1496–1525.
- [5] Cai, T. T., W. Liu, and Y. Xia (2013). Two-sample covariance matrix testing and support recovery in high-dimensional and sparse settings. *Journal of the American Statistical Association* 108(501), 265–277.
- [6] Cai, T. T., W. Liu, and Y. Xia (2014). Two-sample test of high dimensional means under dependence. *Journal of the Royal Statistical Society: Series B (Statistical Methodology)* 76(2), 349–372.
- [7] Chen, S. X., J. Li, and P.-S. Zhong (2019). Two-sample and ANOVA tests for high dimensional means. *The Annals of Statistics* 47(3), 1443–1474.
- [8] Chen, S. X., L.-X. Zhang, and P.-S. Zhong (2010). Tests for high-dimensional covariance matrices. *Journal of the American Statistical Association* 105(490), 810–819.
- [9] Durrett, R. (2019). *Probability: theory and examples* (5 ed.). Cambridge university press.
- [10] Frahm, G. (2004). *Generalized elliptical distributions: theory and applications*. Ph. D. thesis, Universität zu Köln.
- [11] Guo, B. and S. X. Chen (2016). Tests for high dimensional generalized linear models. *Journal of the Royal Statistical Society: Series B (Statistical Methodology)* 78(5), 1079–1102.
- [12] Guyon, X. (1995). *Random fields on a network: modeling, statistics, and applications*. Springer-Verlag, New York.
- [13] Hall, P. (1979). On the rate of convergence of normal extremes. *Journal of Applied Probability* 16(2), 433–439.
- [14] Heyde, C. C. and B. M. Brown (1970). On the departure from normality of a certain class of martingales. *Ann. Math. Statist.* 41(6), 2161–2165.
- [15] Higham, N. J. (2008). *Functions of matrices: theory and computation*, Volume 104. Siam.
- [16] Hsing, T. (1995). A note on the asymptotic independence of the sum and maximum of strongly mixing stationary random variables. *Ann. Probab.* 23(2), 938–947.
- [17] Ibragimov, I. A. and Y. V. Linnik (1971). *Independent and stationary sequences of random variables*. Wolters-Noordhoff Publishing, Groningen.
- [18] Jiang, T. (2004). The asymptotic distributions of the largest entries of sample correlation matrices. *Ann. Appl. Probab.* 14(2), 865–880.
- [19] Kan, R. (2008). From moments of sum to moments of product. *Journal of Multivariate Analysis* 99(3), 542–554.
- [20] Kim, T. Y. (1994). Moment bounds for non-stationary dependent sequences. *Journal of Applied Probability* 31(3), 731–742.
- [21] Ledoit, O. and M. Wolf (2002). Some hypothesis tests for the covariance matrix when the dimension is large compared to the sample size. *Ann. Statist.* 30(4), 1081–1102.
- [22] Li, J. and S. X. Chen (2012). Two sample tests for high-dimensional covariance matrices. *Ann. Statist.* 40(2), 908–940.
- [23] Maruyama, Y. and T. Seo (2003). Estimation of moment parameter in elliptical distributions. *Journal of the Japan Statistical Society* 33(2), 215–229.
- [24] Schott, J. R. (2007). A test for the equality of covariance matrices when the dimension is large relative to the sample sizes. *Computational Statistics & Data Analysis* 51(12), 6535–6542.
- [25] Srivastava, M. S. and H. Yanagihara (2010). Testing the equality of several covariance matrices with fewer observations than the dimension. *Journal of Multivariate Analysis* 101(6), 1319–1329.
- [26] Vershynin, R. (2018). *High-dimensional probability: An introduction with applications*

*in data science*, Volume 47. Cambridge University Press.

- [27] Wu, C., G. Xu, and W. Pan (2019). An adaptive test on high-dimensional parameters in generalized linear models. *Statistica Sinica*.
- [28] Xu, G., L. Lin, P. Wei, and W. Pan (2016). An adaptive two-sample test for high-dimensional means. *Biometrika* 103(3), 609–624.
- [29] Yang, Q. and G. Pan (2017). Weighted statistic in detecting faint and sparse alternatives for high-dimensional covariance matrices. *Journal of the American Statistical Association* 112(517), 188–200.
- [30] Zaitsev, A. Y. (1987). On the Gaussian approximation of convolutions under multidimensional analogues of sn bernstein’s inequality conditions. *Probability theory and related fields* 74(4), 535–566.
